# Supplementary material for: Using trials of caloric restriction and bariatric surgery to explore the effects of body mass index on the circulating proteome
Source: Sci Rep. 2023 Nov 29;13:21077. doi: 10.1038/s41598-023-47030-x (PMC10686974; doi:10.1038/s41598-023-47030-x)
Supplement: Supplementary file 1 — Supplementary Information. [file 41598_2023_47030_MOESM1_ESM.xlsx]

## Sheet: ST1
Supplementary Table 1 - Baseline characteristics of the DiRECT participants and exploring sex differences among characteristics
Baseline variable		Female group mean ± SD or %	Female group N	Male group mean ± SD or %	Male group N	P-value for difference
Age		54.5 (8.3)	120	54.6 (6.9)	172	0.95
Treatment group	Control	0.46	120	0.53	172	0.28
	Intervention	0.54		0.47
BMI (kg/m2)		35.3 (4.6)	120	34.3 (4.2)	172	0.04
Systolic blood pressure (mmHg)		133 (16)	120	137 (17)	172	0.1
HbA1c (mmol/mol)		60 (15)	120	59 (11)	172	0.3
Glucose (mmol/l)		9.1 (3.2)	119	8.9 (2.7)	171	0.63
Insulin (mIU/ml)		23 (15)	118	24 (14.3)	171	0.61
Cholesterol (mmol/l)		4.6 (1.2)	118	4.1 (1.1)	171	0.0014
HDL (mmol/l)		1.2 (0.26)	118	1.1 (0.28)	171	4.1e-05
Triglycerides (mmol/l)		1.9 (0.84)	118	2.1 (1.3)	171	0.073
Diabetes duration (y)		3.0 (1.7)	120	3.0 (1.7)	172	0.084
Number of anti-diabetic medications		1.3 (1.0)	120	1.0 (0.8)	172	0.018
Centre	Scotland	0.66	120	0.69	172	0.71
	Tyneside	0.34		0.31
List size	>5700	0.57	120	0.55		0.9
	=<5700	0.43		0.45

## Sheet: ST2
Supplementary Table 2 - Linear mixed model results for the effect of timepoint on protein levels comparing the intervention group with the control group in the Diabetes Remision Clinical Trial (DiRECT).
TargetFullName	Target	UniProt	EntrezGeneID	EntrezGeneSymbol	Protein	SomaId	Intervention and visit interaction beta coefficient	Intervention and visit interaction SE	Intervention and visit interaction t statistic	95 % Confidence interval	Upper 95% confidence interval	Lower 95% confidence interval	N	P	Subject variance	Subject SD
Chondroadherin	CHAD	O15335	1101	CHAD	13460-4	SL012363	0.966005	0.0822396	11.7462	0.16119	1.12719	0.804815	292	3.20077e-26	0.611261	0.781832
Osteomodulin	OMD	Q99983	4958	OMD	5358-3	SL008574	0.868309	0.0795828	10.9108	0.155982	1.02429	0.712326	292	2.04717e-23	0.619663	0.787187
Immunoglobulin superfamily DCC subclass member 4	IGDC4	Q8TDY8	57722	IGDCC4	9793-145	SL019123	0.796256	0.073386	10.8502	0.143837	0.940093	0.65242	292	2.23969e-23	0.586672	0.765945
Aminoacylase-1	Aminoacylase-1	Q03154	95	ACY1	3343-1	SL005574	-0.973888	0.0897001	-10.8572	0.175812	-0.798076	-1.1497	292	2.60251e-23	0.554148	0.744411
Fatty acid-binding protein, heart	FABP	P05413	2170	FABP3	5437-63	SL001774	-0.893941	0.0853447	-10.4745	0.167276	-0.726665	-1.06122	292	2.75696e-22	0.44517	0.667211
Fumarylacetoacetase	FAAA	P16930	2184	FAH	11424-4	SL008049	-0.951638	0.0986438	-9.64721	0.193342	-0.758296	-1.14498	292	2.5531e-19	0.457099	0.676091
Leucine-rich repeat-containing protein 15	LRC15	Q8TF66	131578	LRRC15	6557-50	SL008774	0.854248	0.0893406	9.5617	0.175108	1.02936	0.67914	292	7.75065e-19	0.553265	0.743818
Adiponectin	Adiponectin	Q15848	9370	ADIPOQ	3554-24	SL004258	0.636867	0.0683959	9.31148	0.134056	0.770923	0.502811	292	2.73897e-18	0.661466	0.813306
Cathepsin Z	CATZ	Q9UBR2	1522	CTSZ	4971-1	SL008380	-0.735673	0.0792836	-9.279	0.155396	-0.580277	-0.891068	292	2.85777e-18	0.719054	0.84797
Apolipoprotein F	Apo F	Q13790	319	APOF	12370-30	SL006348	0.848581	0.0916886	9.25504	0.17971	1.02829	0.668872	292	5.37452e-18	0.586016	0.765517
E-selectin	sE-Selectin	P16581	6401	SELE	3470-1	SL001945	-0.703289	0.080398	-8.7476	0.15758	-0.545709	-0.860869	292	2.10724e-16	0.707594	0.841186
Scavenger receptor class A member 5	SCAR5	Q6ZMJ2	286133	SCARA5	10419-1	SL014110	0.866857	0.099996	8.66892	0.195992	1.06285	0.670865	292	2.454e-16	0.457034	0.676043
Beta-klotho	KLOTB	Q86Z14	152831	KLB	19557-3	SL021540	-0.612594	0.0709875	-8.6296	0.139136	-0.473458	-0.751729	292	5.48678e-16	0.756109	0.869545
Reticulon-4 receptor	Nogo Receptor	Q9BZR6	65078	RTN4R	5105-2	SL005208	-0.63505	0.0744529	-8.52956	0.145928	-0.489122	-0.780978	292	9.19989e-16	0.773125	0.879275
Beta-hexosaminidase subunit beta	Hexosaminidase B	P07686	3074	HEXB	15470-11	SL005383	-0.633225	0.0744505	-8.50532	0.145923	-0.487302	-0.779148	292	1.43673e-15	0.776594	0.881246
Matrix-remodeling-associated protein 8	MXRA8	Q9BRK3	54587	MXRA8	10521-10	SL017989	0.713741	0.0848407	8.41272	0.166288	0.880029	0.547453	292	1.58256e-15	0.589455	0.76776
Matrix metalloproteinase-16	MMP-16	P51512	4325	MMP16	9719-145	SL003331	0.789011	0.0953271	8.27688	0.186841	0.975852	0.60217	292	3.75631e-15	0.590035	0.768138
Secretoglobin family 3A member 1	Secretoglobin family 3A member 1	Q96QR1	92304	SCGB3A1	6252-62	SL006092	0.455524	0.0561504	8.11256	0.110055	0.565578	0.345469	292	1.66384e-14	0.784327	0.885622
Alcohol dehydrogenase 4	ADH4	P08319	127	ADH4	8325-37	SL018474	-0.861266	0.107149	-8.03805	0.210011	-0.651255	-1.07128	292	1.9365e-14	0.433656	0.658526
Proto-oncogene tyrosine-protein kinase receptor Ret	RET	P07949	5979	RET	3220-40	SL010378	-0.577034	0.0717764	-8.03932	0.140682	-0.436352	-0.717715	292	2.10603e-14	0.692826	0.832362
Lysosomal Pro-X carboxypeptidase	Prolylcarboxypeptidase	P42785	5547	PRCP	5722-78	SL009198	-0.801084	0.0996307	-8.04053	0.195276	-0.605807	-0.99636	292	2.45151e-14	0.572847	0.756866
Aggrecan core protein	Aggrecan	P16112	176	ACAN	3280-49	SL004661	0.776029	0.097396	7.96777	0.190896	0.966925	0.585132	292	2.90021e-14	0.513513	0.716598
Cell adhesion molecule-related/down-regulated by oncogenes	CDON	Q4KMG0	50937	CDON	4541-49	SL014092	0.75582	0.0954596	7.91769	0.187101	0.94292	0.568719	292	4.75204e-14	0.537797	0.733347
Protocadherin alpha-4	PCDA4	Q9UN74	56144	PCDHA4	7157-22	SL018095	0.413768	0.0530417	7.80082	0.103962	0.51773	0.309807	292	1.10187e-13	0.88132	0.938786
Neural cell adhesion molecule 1, 120 kDa isoform	NCAM-120	P13591	4684	NCAM1	4498-62	SL003764	0.590644	0.0768807	7.6826	0.150686	0.74133	0.439958	292	1.95107e-13	0.633827	0.796132
Alcohol dehydrogenase 1C	ADH1G	P00326	126	ADH1C	15525-294	SL014682	-0.801573	0.105733	-7.58109	0.207237	-0.594336	-1.00881	292	4.038e-13	0.441497	0.664452
Serine protease HTRA1	HTRA1	Q92743	5654	HTRA1	15594-47	SL008268	-0.780462	0.103542	-7.53763	0.202943	-0.57752	-0.983405	292	5.28752e-13	0.574934	0.758244
Fructose-1,6-bisphosphatase 1	F16P1	P09467	2203	FBP1	7206-20	SL007096	-0.800041	0.106626	-7.50323	0.208988	-0.591054	-1.00903	292	6.63455e-13	0.489344	0.699531
Beta-glucuronidase	BGLR	P08236	2990	GUSB	15562-24	SL008667	-0.717331	0.0956149	-7.50229	0.187405	-0.529925	-0.904736	292	7.26319e-13	0.537163	0.732914
Scavenger receptor cysteine-rich type 1 protein M130	sCD163	Q86VB7	9332	CD163	5028-59	SL005764	-0.442839	0.0593497	-7.46153	0.116325	-0.326514	-0.559165	292	8.94653e-13	0.855053	0.924691
Extracellular superoxide dismutase [Cu-Zn]	SOD3	P08294	6649	SOD3	5660-51	SL003672	0.609257	0.0818393	7.44456	0.160405	0.769662	0.448852	292	9.67628e-13	0.628393	0.792713
Fructose-bisphosphate aldolase B	ALDOB	P05062	229	ALDOB	18185-118	SL008853	-0.734859	0.0992722	-7.40247	0.194573	-0.540286	-0.929433	292	1.42975e-12	0.575234	0.758442
Contactin-1	contactin-1	Q12860	1272	CNTN1	2974-61	SL004855	0.66959	0.091634	7.30723	0.179603	0.849193	0.489988	292	1.63453e-12	0.583072	0.763592
Cadherin-17	CAD17	Q12864	1015	CDH17	16613-3	SL008898	-0.515153	0.0701512	-7.34346	0.137496	-0.377656	-0.652649	292	1.7916e-12	0.778482	0.882316
Plasma protease C1 inhibitor	C1-Esterase Inhibitor	P05155	710	SERPING1	4479-14	SL000308	0.4683	0.0641289	7.30248	0.125693	0.593992	0.342607	292	2.32734e-12	0.777371	0.881687
Bone sialoprotein 2	BSP	P21815	3381	IBSP	3415-61	SL004660	0.675968	0.094328	7.16614	0.184883	0.860851	0.491085	292	4.61903e-12	0.599398	0.774208
Glycerol-3-phosphate dehydrogenase [NAD(+)], cytoplasmic	GPDA	P21695	2819	GPD1	13697-51	SL007151	-0.741761	0.103528	-7.16485	0.202914	-0.538846	-0.944675	292	5.75337e-12	0.433164	0.658152
Growth hormone receptor	Growth hormone receptor	P10912	2690	GHR	2948-58	SL005168	-0.626656	0.0876065	-7.15307	0.171709	-0.454947	-0.798365	292	6.26876e-12	0.58071	0.762043
Galectin-3-binding protein	LG3BP	Q08380	3959	LGALS3BP	5000-52	SL006522	-0.432323	0.0603775	-7.16033	0.11834	-0.313983	-0.550662	292	6.61409e-12	0.862427	0.928669
Polymeric immunoglobulin receptor	PIGR	P01833	5284	PIGR	3216-2	SL005797	-0.511234	0.0724242	-7.05888	0.141952	-0.369283	-0.653186	292	1.22481e-11	0.756341	0.869679
Sex hormone-binding globulin	SHBG	P04278	6462	SHBG	4929-55	SL005102	0.504692	0.0714721	7.06138	0.140085	0.644778	0.364607	292	1.27601e-11	0.771282	0.878227
MARCKS-related protein	MARCKSL1	P49006	65108	MARCKSL1	19175-18	SL015568	0.633087	0.0903002	7.01092	0.176988	0.810076	0.456099	292	1.45311e-11	0.653239	0.808232
Neurofascin	NFASC	O94856	23114	NFASC	7179-69	SL008999	-0.63095	0.0897649	-7.02892	0.175939	-0.455011	-0.806889	292	1.64977e-11	0.634709	0.796686
3-oxo-5-beta-steroid 4-dehydrogenase	AK1D1	P51857	6718	AKR1D1	18398-1	SL021346	-0.800581	0.115341	-6.94098	0.226069	-0.574512	-1.02665	292	2.19299e-11	0.445837	0.66771
Alcohol dehydrogenase 1A	ADH1A	P07327	124	ADH1A	17396-23	SL008013	-0.740548	0.107592	-6.88291	0.210881	-0.529667	-0.951428	292	2.80248e-11	0.438505	0.662197
Protein S100-A13	S100A13	Q99584	6284	S100A13	7223-60	SL005105	0.504297	0.0735422	6.85725	0.144143	0.64844	0.360155	292	3.5009e-11	0.774121	0.879841
Neural cell adhesion molecule L1-like protein	CHL1	O00533	10752	CHL1	8958-51	SL008936	0.551172	0.0806344	6.83544	0.158043	0.709215	0.393128	292	4.38633e-11	0.717028	0.846775
Granulins	GRN	P28799	2896	GRN	4992-49	SL007173	-0.516892	0.0758043	-6.81877	0.148576	-0.368315	-0.665468	292	4.61862e-11	0.746301	0.863887
Carbohydrate sulfotransferase 9	Carbohydrate sulfotransferase 9	Q7L1S5	83539	CHST9	11646-4	SL005434	-0.485994	0.0725254	-6.70102	0.14215	-0.343844	-0.628144	292	9.56805e-11	0.782406	0.884537
ADAMTS-like protein 2	ATL2	Q86TH1	9719	ADAMTSL2	6379-62	SL012648	-0.51089	0.0763365	-6.69261	0.14962	-0.361271	-0.66051	292	1.1567e-10	0.757042	0.870082
Osteopontin	Osteopontin	P10451	6696	SPP1	13113-7	SL002688	0.634957	0.0962462	6.59722	0.188642	0.823599	0.446314	292	1.84448e-10	0.610228	0.781171
Cerebellin-1	CBLN1	P23435	869	CBLN1	9313-27	SL017250	0.286586	0.0439349	6.52297	0.0861123	0.372698	0.200473	292	2.57568e-10	0.854093	0.924171
Anthrax toxin receptor 1	ANTR1	Q9H6X2	84168	ANTXR1	10464-6	SL008696	0.658381	0.102887	6.39909	0.201658	0.860039	0.456723	292	5.09683e-10	0.486917	0.697794
Receptor-type tyrosine-protein phosphatase U	PTPRU	Q92729	10076	PTPRU	8337-65	SL018463	-0.754921	0.119179	-6.33433	0.233591	-0.52133	-0.988512	292	6.93772e-10	0.442856	0.665474
Complement factor B	Factor B	P00751	629	CFB	4129-72	SL000414	-0.553225	0.0873086	-6.33644	0.171125	-0.382101	-0.72435	292	8.13402e-10	0.649306	0.805795
Carboxypeptidase M	CBPM	P14384	1368	CPM	9416-77	SL008646	-0.611559	0.0975676	-6.26805	0.191232	-0.420326	-0.802791	292	1.52949e-09	0.629875	0.793646
Calpain-2 catalytic subunit	CAN2	P17655	824	CAPN2	14684-17	SL011179	0.632506	0.101456	6.23429	0.198854	0.83136	0.433653	292	1.56019e-09	0.50598	0.711323
Argininosuccinate lyase	ARLY	P04424	435	ASL	11241-8	SL011173	-0.638493	0.104086	-6.13428	0.204009	-0.434484	-0.842502	292	2.66105e-09	0.506627	0.711777
Sphingomyelin phosphodiesterase	ASM	P17405	6609	SMPD1	10818-36	SL008921	-0.478523	0.0778612	-6.14585	0.152608	-0.325915	-0.631131	292	2.93981e-09	0.777951	0.882015
Ciliary neurotrophic factor receptor subunit alpha	CNTFR alpha	P26992	1271	CNTFR	14101-2	SL005153	0.559214	0.0918324	6.08951	0.179991	0.739205	0.379222	292	3.10242e-09	0.634506	0.796559
Calpastatin	Calpastatin	P20810	831	CAST	3026-5	SL000338	0.340441	0.0559696	6.08261	0.1097	0.450141	0.23074	292	3.47423e-09	0.863542	0.92927
Ornithine carbamoyltransferase, mitochondrial	OTCase	P00480	5009	OTC	15431-31	SL000531	-0.611735	0.100614	-6.08001	0.197203	-0.414531	-0.808938	292	3.529e-09	0.611604	0.782051
Intercellular adhesion molecule 4	ICAM4	Q14773	3386	ICAM4	6550-4	SL010843	0.355403	0.0586822	6.0564	0.115017	0.47042	0.240386	292	4.17286e-09	0.86225	0.928574
Coiled-coil domain-containing protein 126	CC126	Q96EE4	90693	CCDC126	6388-21	SL017451	0.480466	0.0797777	6.02256	0.156364	0.636831	0.324102	292	4.41414e-09	0.729898	0.854341
Agrin	Agrin	O00468	375790	AGRN	15483-377	SL005368	-0.477789	0.0789005	-6.05558	0.154645	-0.323144	-0.632434	292	5.11298e-09	0.726323	0.852246
Ubiquitin-conjugating enzyme E2 G2	UB2G2	P60604	7327	UBE2G2	9199-6	SL018946	-0.509693	0.0844364	-6.03641	0.165495	-0.344197	-0.675188	292	5.50535e-09	0.542649	0.736647
Tumor necrosis factor ligand superfamily member 12	TWEAK	O43508	8742	TNFSF12	5939-42	SL004365	0.580785	0.0972509	5.97203	0.190612	0.771397	0.390173	292	6.06926e-09	0.617691	0.785933
Immunoglobulin M	IgM	P01871	3507 3512 50802 3535	IGHM IGJ IGK@ IGL@	3069-52	SL000468	0.285007	0.047742	5.96974	0.0935743	0.378582	0.191433	292	6.58081e-09	0.911929	0.95495
Limbic system-associated membrane protein	LSAMP	Q13449	4045	LSAMP	2999-6	SL005196	0.51707	0.0871695	5.93177	0.170852	0.687922	0.346218	292	7.16051e-09	0.593544	0.770418
Interleukin-1 receptor antagonist protein	IL-1Ra	P18510	3557	IL1RN	5353-89	SL001990	-0.637402	0.107882	-5.90834	0.211448	-0.425954	-0.84885	292	7.78929e-09	0.453137	0.673155
Collagen Type III	Collagen Type III	P02461	1281	COL3A1	18880-81	SL002805	-0.628971	0.106046	-5.93111	0.20785	-0.421121	-0.836821	292	8.38356e-09	0.571516	0.755987
Histone-lysine N-methyltransferase EHMT2	NG36	Q96KQ7	10919	EHMT2	5843-60	SL003542	0.526515	0.0894832	5.88396	0.175387	0.701902	0.351128	292	8.94378e-09	0.601273	0.775418
Receptor-type tyrosine-protein phosphatase S	PTPRS	Q13332	5802	PTPRS	6049-64	SL006532	0.628665	0.10697	5.87701	0.209662	0.838327	0.419003	292	1.01168e-08	0.51723	0.719187
Beta-Ala-His dipeptidase	CNDP1	Q96KN2	84735	CNDP1	5456-59	SL006694	-0.419545	0.0712851	-5.88546	0.139719	-0.279827	-0.559264	292	1.03104e-08	0.782336	0.884498
Liver carboxylesterase 1	carboxylesterase, liver	P23141	1066	CES1	15487-164	SL006149	-0.649945	0.110775	-5.86724	0.217119	-0.432826	-0.867065	292	1.10598e-08	0.523996	0.723875
PCNA-associated factor	PAF	Q15004	9768	PAF	19158-1	SL014957	0.499157	0.0851697	5.86074	0.166933	0.66609	0.332225	292	1.18546e-08	0.730534	0.854713
Sialic acid-binding Ig-like lectin 7	Siglec-7	Q9Y286	27036	SIGLEC7	2742-68	SL005218	-0.438634	0.0758403	-5.78365	0.148647	-0.289987	-0.587281	292	1.55265e-08	0.788003	0.887696
Retinol-binding protein 5	RBP-III	P82980	83758	RBP5	19241-31	SL005353	-0.677189	0.11739	-5.76871	0.230084	-0.447105	-0.907274	292	1.61174e-08	0.432631	0.657747
Secretory phospholipase A2 receptor	PLA2R	Q13018	22925	PLA2R1	10916-44	SL013523	0.59842	0.103581	5.7773	0.203019	0.801439	0.395401	292	1.76727e-08	0.470094	0.685634
Macrophage colony-stimulating factor 1 receptor	M-CSF R	P07333	1436	CSF1R	13682-47	SL004153	-0.414626	0.0724094	-5.72613	0.141922	-0.272703	-0.556548	292	2.16723e-08	0.786505	0.886851
CUB domain-containing protein 1	CDCP1	Q9H5V8	64866	CDCP1	16818-200	SL017488	-0.563046	0.0984207	-5.72081	0.192905	-0.370141	-0.755951	292	2.17993e-08	0.628955	0.793067
Insulin-like growth factor-binding protein 2	IGFBP-2	P18065	3485	IGFBP2	8469-41	SL000466	0.521891	0.0914047	5.70968	0.179153	0.701045	0.342738	292	2.59805e-08	0.570923	0.755594
Endosialin	CD248	Q9HCU0	57124	CD248	15491-20	SL008437	0.481137	0.0843695	5.70273	0.165364	0.646501	0.315773	292	2.61144e-08	0.629618	0.793485
Inhibin beta C chain	INHBC	P55103	3626	INHBC	6408-2	SL007288	-0.601859	0.105997	-5.67808	0.207754	-0.394105	-0.809613	292	2.76885e-08	0.550363	0.741864
Trafficking protein particle complex subunit 3	TPPC3	O43617		TRAPPC3	14337-1	SL019699	-0.525827	0.0919918	-5.71602	0.180304	-0.345523	-0.70613	292	2.98199e-08	0.556921	0.746272
Dual specificity protein phosphatase 13 isoform A	DUSP13	Q6B8I1	51207	DUSP13	6525-17	SL012566	0.704868	0.124491	5.66201	0.244002	0.94887	0.460866	292	3.3405e-08	0.257866	0.507805
Sialic acid-binding Ig-like lectin 12	SIG12	Q96PQ1	89858	SIGLEC12	8352-26	SL018490	-0.542034	0.0958036	-5.65776	0.187775	-0.354259	-0.729809	292	3.52604e-08	0.564129	0.751085
ProSAAS	PCSK1	Q9UHG2	27344	PCSK1N	9391-60	SL008370	0.522474	0.0930969	5.61215	0.18247	0.704944	0.340004	292	4.38935e-08	0.636294	0.79768
Potassium voltage-gated channel subfamily E regulatory beta subunit 5	KCE1L	Q9UJ90	23630	KCNE5	8908-14	SL008542	0.465657	0.0832361	5.59441	0.163143	0.6288	0.302514	292	4.79089e-08	0.68768	0.829265
Gamma-aminobutyric acid type B receptor subunit 2	GABR2	O75899	9568	GABBR2	13948-50	SL019207	0.565238	0.100758	5.60985	0.197486	0.762724	0.367752	292	4.90473e-08	0.555425	0.745269
Transforming growth factor beta receptor type 3	TGF-b R III	Q03167	7049	TGFBR3	3009-3	SL005059	0.551089	0.0989005	5.57215	0.193845	0.744934	0.357244	292	5.21687e-08	0.556607	0.746061
Ribosyldihydronicotinamide dehydrogenase [quinone]	Quinone reductase 2	P16083	4835	NQO2	9754-33	SL006251	0.398542	0.0712845	5.59086	0.139718	0.538259	0.258824	292	5.31137e-08	0.79679	0.892631
Palmitoleoyl-protein carboxylesterase NOTUM	NOTUM	Q6P988	147111	NOTUM	8252-2	SL012580	-0.652955	0.117289	-5.56706	0.229886	-0.423069	-0.882841	292	5.70477e-08	0.481965	0.694237
Anthrax toxin receptor 2	ANTR2	P58335	118429	ANTXR2	15559-5	SL011048	0.42731	0.0777485	5.49606	0.152387	0.579697	0.274923	292	7.1143e-08	0.720502	0.848824
Neurocan core protein	CSPG3	O14594	1463	NCAN	15573-110	SL008782	0.54548	0.0991331	5.5025	0.194301	0.739781	0.351179	292	7.2814e-08	0.57854	0.760618
D-amino-acid oxidase	OXDA	P14920	1610	DAO	19120-33	SL014720	-0.60344	0.109665	-5.50259	0.214943	-0.388497	-0.818383	292	7.45715e-08	0.534698	0.731231
Growth/differentiation factor 15	MIC-1	Q99988	9518	GDF15	4374-45	SL003869	-0.512943	0.0936119	-5.47946	0.183479	-0.329463	-0.696422	292	7.97526e-08	0.542356	0.736448
Vesicular, overexpressed in cancer, prosurvival protein 1	ECOP	Q96AW1	81552	VOPP1	14618-26	SL012766	0.574242	0.104753	5.48186	0.205316	0.779559	0.368926	292	8.16571e-08	0.514233	0.7171
Bombesin receptor-activated protein C6orf89	CF089	Q6UWU4	221477	C6orf89	10885-36	SL016472	0.62853	0.115449	5.44421	0.226281	0.854811	0.402249	292	9.20295e-08	0.445336	0.667335
Beta-defensin 1	HBD-1	P60022	1672	DEFB1	6629-3	SL004532	-0.536472	0.0990871	-5.41414	0.194211	-0.342261	-0.730683	292	1.32945e-07	0.629592	0.793468
Insulin	Insulin	P01308	3630	INS	4883-56	SL000021	-0.603752	0.112386	-5.37215	0.220276	-0.383476	-0.824028	292	1.3808e-07	0.550233	0.741777
Aldo-keto reductase family 1 member C1	Aldo-keto reductase 1C1	Q04828	1645	AKR1C1	12618-50	SL008344	-0.604794	0.112798	-5.36176	0.221083	-0.38371	-0.825877	292	1.46467e-07	0.438419	0.662132
Heparan-sulfate 6-O-sulfotransferase 3	H6ST3	Q8IZP7	266722	HS6ST3	18896-23	SL021212	0.430703	0.0804769	5.35189	0.157735	0.588438	0.272969	292	1.50761e-07	0.754225	0.868461
Out at first protein homolog	OAF	Q86UD1	220323	OAF	6414-8	SL008961	-0.463528	0.0863075	-5.37065	0.169163	-0.294365	-0.63269	292	1.53584e-07	0.682109	0.825899
Insulin-like growth factor-binding protein 5	IGFBP-5	P24593	3488	IGFBP5	19581-15	SL004676	0.637321	0.119167	5.34812	0.233568	0.870889	0.403754	292	1.54797e-07	0.456355	0.675541
Protein phosphatase 1 regulatory subunit 1A	PPR1A	Q13522	5502	PPP1R1A	17706-4	SL020934	-0.533779	0.100239	-5.32505	0.196469	-0.33731	-0.730248	292	1.62315e-07	0.473903	0.688406
Platelet-activating factor acetylhydrolase	PAFAH	Q13093	7941	PLA2G7	5015-15	SL003440	0.482618	0.0907285	5.31937	0.177828	0.660446	0.30479	292	1.88792e-07	0.669701	0.818353
Glutathione S-transferase P	Glutathione S-transferase Pi	P09211	2950	GSTP1	4911-49	SL003643	0.738097	0.138765	5.31905	0.271979	1.01008	0.466118	292	1.91018e-07	0.129968	0.360511
Dual specificity mitogen-activated protein kinase kinase 4	MP2K4	P45985	6416	MAP2K4	5242-37	SL007237	0.412051	0.0777754	5.29796	0.15244	0.564491	0.259611	292	1.98972e-07	0.758503	0.870921
Glutaminyl-peptide cyclotransferase-like protein	QPCTL	Q9NXS2	54814	QPCTL	8866-53	SL018693	0.460325	0.086724	5.30793	0.169979	0.630304	0.290346	292	2.09356e-07	0.597926	0.773257
Cysteine-rich secretory protein 2	CRIS2	P16562	7180	CRISP2	9282-12	SL009427	0.196399	0.0370569	5.29993	0.0726315	0.26903	0.123767	292	2.11539e-07	0.668807	0.817806
Cyclic AMP-dependent transcription factor ATF-6 alpha	ATF6A	P18850	22926	ATF6	11277-23	SL014732	-0.418832	0.0789154	-5.30736	0.154674	-0.264158	-0.573507	292	2.19373e-07	0.700217	0.83679
Heparin cofactor 2	Heparin cofactor II	P05546	3053	SERPIND1	3316-58	SL004466	-0.40903	0.0772497	-5.2949	0.151409	-0.25762	-0.560439	292	2.41209e-07	0.756973	0.870042
Macrophage mannose receptor 1	Macrophage mannose receptor	P22897	4360	MRC1	2637-77	SL004579	-0.390443	0.0744872	-5.24175	0.145995	-0.244448	-0.536438	292	2.82765e-07	0.800887	0.894923
Fibulin-1	fibulin 1	P23142	2192	FBLN1	6470-19	SL004461	0.523173	0.100871	5.18656	0.197707	0.72088	0.325466	292	3.25215e-07	0.548525	0.740625
Interleukin-1 Receptor accessory protein	IL-1 R AcP	Q9NPH3	3556	IL1RAP	14048-7	SL004588	0.35689	0.0687954	5.1877	0.134839	0.491729	0.222051	292	3.75548e-07	0.812757	0.90153
Alcohol dehydrogenase 1B	ADH1B	P00325	125	ADH1B	9834-62	SL007996	-0.577234	0.111519	-5.17611	0.218577	-0.358657	-0.795812	292	3.88084e-07	0.535949	0.732085
Glutamate receptor ionotropic, delta-2	GRID2	O43424		GRID2	12758-47	SL019871	0.389042	0.0753114	5.16578	0.14761	0.536652	0.241432	292	4.14408e-07	0.741031	0.860831
Cartilage intermediate layer protein 2	CILP2	Q8IUL8	148113	CILP2	8841-65	SL008847	0.562636	0.109167	5.15388	0.213968	0.776605	0.348668	292	4.28829e-07	0.52837	0.726891
Brevican core protein	PGCB	Q96GW7	63827	BCAN	3461-58	SL009089	0.524418	0.10252	5.1153	0.200938	0.725356	0.323479	292	4.68955e-07	0.620786	0.7879
Leukocyte cell-derived chemotaxin-2	LECT2	O14960	3950	LECT2	16763-11	SL017261	-0.457526	0.0891742	-5.1307	0.174781	-0.282745	-0.632307	292	4.7222e-07	0.670189	0.818651
Anosmin-1	KALM	P23352	3730	KAL1	6603-18	SL012426	0.503613	0.0981104	5.13312	0.192296	0.695909	0.311316	292	4.81439e-07	0.640954	0.800596
Stanniocalcin-1	Stanniocalcin-1	P52823	6781	STC1	4930-21	SL005789	-0.449382	0.0877384	-5.12184	0.171967	-0.277415	-0.621349	292	5.15666e-07	0.711573	0.843548
Matrix metalloproteinase-19	MMP19	Q99542	4327	MMP19	6425-87	SL007616	-0.617498	0.121508	-5.08195	0.238156	-0.379342	-0.855653	292	6.10675e-07	0.336637	0.580204
Zinc finger protein SNAI2	SLUG	O43623	6591	SNAI2	10014-31	SL007803	-0.547058	0.107881	-5.07095	0.211446	-0.335612	-0.758505	292	6.31989e-07	0.56676	0.752834
Ras-related protein Rab-26	RAB26	Q9ULW5	25837	RAB26	6997-32	SL017971	0.460047	0.0905811	5.07884	0.177539	0.637587	0.282508	292	6.43387e-07	0.676664	0.822596
Neuronal growth regulator 1	NEGR1	Q7Z3B1	257194	NEGR1	13109-82	SL008810	0.445256	0.0883939	5.03718	0.173252	0.618509	0.272004	292	7.3265e-07	0.626453	0.791488
Collagen alpha-1(X) chain	COAA1	Q03692	1300	COL10A1	15653-9	SL006511	0.445004	0.0880641	5.05318	0.172606	0.617609	0.272398	292	7.62769e-07	0.68948	0.830349
SLIT and NTRK-like protein 4	SLIK4	Q8IW52	139065	SLITRK4	7139-14	SL018085	0.476819	0.0948516	5.027	0.185909	0.662728	0.29091	292	7.80356e-07	0.428803	0.65483
Collectin-12	COLEC12	Q5KU26	81035	COLEC12	5457-5	SL007471	0.483708	0.0962637	5.02483	0.188677	0.672385	0.295031	292	7.98823e-07	0.591846	0.769316
Growth arrest-specific protein 1	GAS1	P54826	2619	GAS1	5463-22	SL000658	0.58954	0.117303	5.02578	0.229914	0.819454	0.359626	292	8.52894e-07	0.33428	0.578169
NADPH--cytochrome P450 reductase	NADPH-P450 Oxidoreductase	P16435	5447	POR	2731-29	SL000528	-0.552527	0.110216	-5.01314	0.216023	-0.336504	-0.76855	292	8.70327e-07	0.484076	0.695756
Melanoma-derived growth regulatory protein	MIA	Q16674	8190	MIA	2687-2	SL001947	0.377982	0.0758693	4.98201	0.148704	0.526685	0.229278	292	9.85893e-07	0.742131	0.86147
Complement factor H-related protein 4	FHR4	Q92496	10877	CFHR4	6471-53	SL002692	0.24896	0.049944	4.98478	0.0978903	0.34685	0.15107	292	1.04804e-06	0.905642	0.951652
Kremen protein 1	KREM1	Q96MU8	83999	KREMEN1	17331-138	SL008768	-0.404521	0.0816105	-4.95673	0.159957	-0.244565	-0.564478	292	1.13778e-06	0.727366	0.852858
Hsc70-interacting protein	suppression of tumorigenicity 13	P50502	6767	ST13	18387-7	SL009200	0.730492	0.147715	4.94527	0.289522	1.02001	0.44097	292	1.21153e-06	0.141683	0.376408
Fructose-bisphosphate aldolase C	aldolase C	P09972	230	ALDOC	9876-20	SL004727	-0.50449	0.102246	-4.93407	0.200403	-0.304087	-0.704892	292	1.25006e-06	0.538716	0.733973
Low affinity immunoglobulin gamma Fc region receptor III-B	FCG3B	O75015	2215	FCGR3B	3311-27	SL008609	-0.303398	0.0615961	-4.92561	0.120728	-0.18267	-0.424126	292	1.25332e-06	0.8543	0.924283
Sialidase-1	NEUR1	Q99519	4758	NEU1	15426-5	SL008692	-0.559301	0.113859	-4.91221	0.223164	-0.336137	-0.782465	292	1.284e-06	0.510879	0.714758
Glycolipid transfer protein domain-containing protein 2	GLTD2	A6NH11	388323	GLTPD2	7948-129	SL010876	-0.429555	0.0876408	-4.90132	0.171776	-0.25778	-0.601331	292	1.3868e-06	0.573611	0.757371
Proprotein convertase subtilisin/kexin type 7	PCSK7	Q16549	9159	PCSK7	4459-68	SL014069	-0.507869	0.10391	-4.88758	0.203664	-0.304205	-0.711533	292	1.44535e-06	0.621711	0.788487
Cyclin-dependent kinase inhibitor 3	CDKN3	Q16667	1033	CDKN3	14178-18	SL007463	0.483265	0.099784	4.84311	0.195577	0.678842	0.287688	292	1.82463e-06	0.598116	0.773379
Tumor necrosis factor receptor superfamily member 1B	TNF sR-II	P20333	7133	TNFRSF1B	8368-102	SL001800	-0.352382	0.0728796	-4.83513	0.142844	-0.209538	-0.495227	292	1.85479e-06	0.773483	0.879479
V-set and immunoglobulin domain-containing protein 10	VSI10	Q8N0Z9	54621	VSIG10	10825-12	SL018584	0.568708	0.11698	4.86159	0.22928	0.797988	0.339427	292	1.88586e-06	0.506596	0.711756
Pleiotrophin	PTN	P21246	5764	PTN	3045-72	SL002704	0.547041	0.112311	4.87076	0.22013	0.767171	0.326911	292	1.89219e-06	0.312603	0.55911
SLIT and NTRK-like protein 5	SLIK5	O94991	26050	SLITRK5	4568-17	SL014070	0.494445	0.102117	4.84194	0.20015	0.694595	0.294296	292	1.96834e-06	0.571869	0.75622
Corticotropin-releasing factor-binding protein	CRHBP	P24387	1393	CRHBP	6039-24	SL017254	-0.433257	0.0899028	-4.81918	0.176209	-0.257048	-0.609467	292	1.97969e-06	0.695288	0.833839
Bile salt sulfotransferase	SULT 2A1	Q06520	6822	SULT2A1	9829-91	SL000579	-0.498177	0.103471	-4.81465	0.202803	-0.295374	-0.70098	292	2.02106e-06	0.563914	0.750942
MANSC domain-containing protein 1	MANS1	Q9H8J5	54682	MANSC1	9557-5	SL018998	0.359007	0.0742347	4.8361	0.1455	0.504506	0.213507	292	2.0557e-06	0.79524	0.891763
72 kDa type IV collagenase	MMP-2	P08253	4313	MMP2	4160-49	SL000124	0.470018	0.0977817	4.8068	0.191652	0.66167	0.278365	292	2.08555e-06	0.513201	0.716381
Chitinase-3-like protein 1	YKL-40	P36222	1116	CHI3L1	11104-13	SL003340	-0.267355	0.055443	-4.82215	0.108668	-0.158686	-0.376023	292	2.12187e-06	0.868454	0.931909
Neuroplastin	NPTN	Q9Y639	27020	NPTN	7194-36	SL008497	0.58636	0.121658	4.81974	0.23845	0.82481	0.34791	292	2.13419e-06	0.382075	0.618122
Retinal dehydrogenase 1	Retinal dehydrogenase 1	P00352	216	ALDH1A1	11265-8	SL005674	-0.600334	0.125111	-4.7984	0.245218	-0.355116	-0.845552	292	2.31025e-06	0.287958	0.536617
Insulin-like growth factor-binding protein 1	IGFBP-1	P08833	3484	IGFBP1	2771-35	SL000462	0.477589	0.0993704	4.80615	0.194766	0.672355	0.282823	292	2.31054e-06	0.589627	0.767872
Protein NDRG3	NDRG3	Q9UGV2	57446	NDRG3	18312-68	SL015308	0.536234	0.11166	4.80239	0.218853	0.755087	0.317381	292	2.38645e-06	0.553065	0.743684
Vesicular integral-membrane protein VIP36	Lectin, mannose-binding 2	Q12907	10960	LMAN2	7638-30	SL005403	-0.555878	0.115623	-4.80766	0.226621	-0.329256	-0.782499	292	2.38655e-06	0.372306	0.610169
Tubulin-specific chaperone A	TBCA	O75347	6902	TBCA	12501-10	SL008849	0.481276	0.10063	4.78261	0.197236	0.678512	0.28404	292	2.44041e-06	0.644074	0.802542
E3 ubiquitin-protein ligase RNF146	RN146	Q9NTX7		RNF146	11401-181	SL019468	0.453565	0.0947841	4.78524	0.185777	0.639341	0.267788	292	2.56144e-06	0.675655	0.821982
Stromal cell-derived factor 1	SDF-1	P48061	6387	CXCL12	9278-9	SL004712	0.551262	0.115056	4.79125	0.22551	0.776772	0.325753	292	2.65557e-06	0.506074	0.711389
Leukocyte cell-derived chemotaxin 1	LECT1	O75829	11061	LECT1	9928-125	SL007044	0.614729	0.129645	4.74164	0.254104	0.868832	0.360625	292	2.87429e-06	0.315347	0.561557
C-C motif chemokine 23	MPIF-1	P55773	6368	CCL23	2913-1	SL003302	0.4113	0.08659	4.74997	0.169716	0.581016	0.241583	292	2.91007e-06	0.722587	0.850051
Core-binding factor subunit beta	PEBB	Q13951	865	CBFB	10048-7	SL011998	0.659495	0.139278	4.7351	0.272985	0.93248	0.38651	292	3.13807e-06	0.288293	0.536929
Plexin-B2	PLXB2	O15031	23654	PLXNB2	9216-100	SL009948	-0.500809	0.10563	-4.74118	0.207034	-0.293775	-0.707843	292	3.14874e-06	0.576765	0.75945
Astrocytic phosphoprotein PEA-15	PEA15	Q15121	8682	PEA15	18833-76	SL011227	0.582344	0.123354	4.72091	0.241774	0.824119	0.34057	292	3.24962e-06	0.421754	0.649426
Wnt inhibitory factor 1	WIF-1	Q9Y5W5	11197	WIF1	16070-7	SL004652	0.495131	0.104378	4.74362	0.204581	0.699713	0.29055	292	3.47603e-06	0.57323	0.75712
Peptide YY	PYY	P10082	5697	PYY	3727-35	SL011509	-0.53452	0.1137	-4.70115	0.222852	-0.311668	-0.757371	292	3.7159e-06	0.472422	0.687329
Macrophage scavenger receptor types I and II	Macrophage scavenger receptor	P21757	4481	MSR1	15533-97	SL004580	-0.414324	0.088433	-4.68517	0.173329	-0.240995	-0.587652	292	3.77773e-06	0.68556	0.827985
Protein CYR61	CYR61	O00622	3491	CYR61	6264-9	SL010428	-0.470135	0.100307	-4.68695	0.196602	-0.273533	-0.666737	292	3.89022e-06	0.526065	0.725303
Alpha-2-macroglobulin	a2-Macroglobulin	P01023	2	A2M	3708-62	SL000252	0.33717	0.0718681	4.69151	0.140862	0.478032	0.196309	292	3.8953e-06	0.708197	0.841544
Ubiquitin-conjugating enzyme E2 N	UBE2N	P61088	7334	UBE2N	3905-62	SL008143	0.734428	0.15758	4.66066	0.308857	1.04329	0.425571	292	4.52117e-06	0.056484	0.237664
Disintegrin and metalloproteinase domain-containing protein 22	ADA22	Q9P0K1	53616	ADAM22	7933-75	SL018350	0.490643	0.105867	4.63453	0.207499	0.698142	0.283144	292	4.73675e-06	0.576765	0.75945
Rap1 GTPase-activating protein 1	RPGP1	P47736		RAP1GAP	13735-1	SL020221	0.542514	0.116934	4.6395	0.22919	0.771704	0.313324	292	4.81188e-06	0.513074	0.716292
Leukocyte immunoglobulin-like receptor subfamily A member 5	LIRA5	A6NI73	353514	LILRA5	7787-25	SL018231	-0.317634	0.0684825	-4.63818	0.134226	-0.183409	-0.45186	292	4.96522e-06	0.830588	0.911366
Axin interactor, dorsalization-associated protein	CA080	Q96BJ3	64853	AIDA	17347-80	SL011281	0.735185	0.158796	4.62974	0.31124	1.04643	0.423944	292	5.16134e-06	0.0379108	0.194707
Secreted frizzled-related protein 3	sFRP-3	Q92765	2487	FRZB	13740-51	SL004650	0.322199	0.0698738	4.61116	0.136953	0.459152	0.185246	292	5.51093e-06	0.81372	0.902064
Phenylethanolamine N-methyltransferase	PNMT	P11086	5409	PNMT	17204-17	SL013738	0.466177	0.101239	4.60472	0.198428	0.664606	0.267749	292	5.52156e-06	0.573324	0.757182
Proteasome subunit beta type-2	PSB2	P49721	5690	PSMB2	19252-67	SL008675	0.467807	0.101393	4.61381	0.19873	0.666537	0.269077	292	5.52246e-06	0.466878	0.683285
Cerebral dopamine neurotrophic factor	ARMEL	Q49AH0	441549	CDNF	4962-52	SL012538	0.482227	0.104643	4.6083	0.2051	0.687328	0.277127	292	5.65703e-06	0.512556	0.71593
Fibroblast growth factor receptor 1	bFGF-R	P11362	2260	FGFR1	5532-53	SL003060	0.54971	0.119637	4.5948	0.234489	0.784199	0.315221	292	5.94721e-06	0.445973	0.667812
Neurogenic locus notch homolog protein 3	Notch-3	Q9UM47	4854	NOTCH3	5108-72	SL005209	0.402174	0.0876493	4.58844	0.171793	0.573967	0.230381	292	5.97449e-06	0.601205	0.775374
Prolyl endopeptidase FAP	SEPR	Q12884	2191	FAP	5029-3	SL006528	0.43198	0.0942586	4.58292	0.184747	0.616727	0.247233	292	6.01305e-06	0.613579	0.783313
Pigment epithelium-derived factor	PEDF	P36955	5176	SERPINF1	9211-19	SL003066	-0.508702	0.110837	-4.58964	0.21724	-0.291461	-0.725942	292	6.51376e-06	0.533857	0.730655
Transmembrane glycoprotein NMB	GPNMB	Q14956	10457	GPNMB	8606-39	SL007429	0.507366	0.111264	4.56003	0.218077	0.725443	0.289289	292	6.80115e-06	0.484073	0.695754
Leucine-rich repeat and fibronectin type-III domain-containing protein 2	LRFN2	Q9ULH4	57497	LRFN2	7200-4	SL018112	0.477853	0.104869	4.55667	0.205543	0.683396	0.27231	292	7.40593e-06	0.540377	0.735103
Hepatocyte growth factor receptor	Met	P08581	4233	MET	2837-3	SL000134	0.421286	0.0931277	4.52375	0.18253	0.603817	0.238756	292	7.58341e-06	0.673828	0.82087
Ectonucleotide pyrophosphatase/phosphodiesterase family member 5	ENPP5	Q9UJA9	59084	ENPP5	6556-5	SL012863	0.206368	0.0456609	4.51957	0.0894954	0.295863	0.116872	292	8.19821e-06	0.77402	0.879784
Importin subunit alpha-5	IMA5	P52294	3836	KPNA1	19587-12	SL021249	0.581746	0.129096	4.50629	0.253029	0.834774	0.328717	292	8.76483e-06	0.413944	0.643385
3-hydroxybutyrate dehydrogenase type 2	BDH2	Q9BUT1	56898	BDH2	17329-2	SL009125	-0.494836	0.109981	-4.49929	0.215563	-0.279274	-0.710399	292	9.06931e-06	0.522113	0.722574
Thrombospondin-2	TSP2	P35442	7058	THBS2	3339-33	SL007206	-0.432884	0.0963347	-4.49354	0.188816	-0.244068	-0.6217	292	9.09896e-06	0.636179	0.797609
Ectonucleotide pyrophosphatase/phosphodiesterase family member 7	ENPP7	Q6UWV6	339221	ENPP7	4435-66	SL009045	-0.34398	0.0765221	-4.49518	0.149983	-0.193997	-0.493964	292	9.64644e-06	0.788166	0.887787
Serine/threonine-protein phosphatase 2A 65 kDa regulatory subunit A alpha isoform	PP2AAA	P30153	5518	PPP2R1A	12621-55	SL008081	0.667261	0.149369	4.46721	0.292763	0.960024	0.374499	292	1.01605e-05	0.168957	0.411044
Coagulation factor IX	Coagulation Factor IX	P00740	2158	F9	4876-32	SL000357	-0.438065	0.0979565	-4.47204	0.191995	-0.24607	-0.63006	292	1.02533e-05	0.617444	0.785776
Spermine synthase	SPSY	P52788	6611	SMS	18179-56	SL011200	0.600737	0.134923	4.45243	0.26445	0.865187	0.336287	292	1.05164e-05	0.30644	0.55357
Hippocalcin-like protein 1	HPCL1	P37235	3241	HPCAL1	17791-25	SL011188	0.68715	0.154031	4.46113	0.3019	0.989051	0.38525	292	1.05294e-05	0.147707	0.384327
Integrin alpha-V: beta-5 complex	Integrin aVb5	P06756, P18084	3685 3693	ITGAV ITGB5	4917-62	SL003182	0.455881	0.102289	4.4568	0.200486	0.656367	0.255395	292	1.06616e-05	0.586866	0.766072
Glutathione S-transferase Mu 3	GSTM3-3	P21266	2947	GSTM3	9748-31	SL005394	0.38028	0.0853996	4.45295	0.167383	0.547663	0.212897	292	1.09544e-05	0.742525	0.861699
Sialic acid-binding Ig-like lectin 14	SIG14	Q08ET2	100049587	SIGLEC14	8248-222	SL014292	-0.205997	0.0461381	-4.46478	0.0904307	-0.115566	-0.296427	292	1.10338e-05	0.919786	0.959055
Growth arrest-specific protein 6	GAS-6	Q14393	2621	GAS6	15391-114	SL005707	-0.373158	0.0836449	-4.46122	0.163944	-0.209214	-0.537102	292	1.10417e-05	0.727844	0.853138
Fc receptor-like protein 4	FCRL4	Q96PJ5	83417	FCRL4	8973-23	SL018774	0.280503	0.0631765	4.43999	0.123826	0.404329	0.156677	292	1.21151e-05	0.847653	0.920681
Catechol O-methyltransferase	Catechol O-methyltransferase	P21964	1312	COMT	18382-109	SL009649	-0.581312	0.131158	-4.43213	0.257071	-0.324241	-0.838382	292	1.23167e-05	0.30414	0.551489
Calponin-1	Calponin-1	P51911	1264	CNN1	15566-10	SL004911	0.504621	0.113968	4.42775	0.223377	0.727998	0.281244	292	1.23926e-05	0.503597	0.709646
Interleukin-1 receptor type 2	IL-1 sRII	P27930	7850	IL1R2	14133-93	SL000145	-0.350911	0.0789186	-4.4465	0.15468	-0.196231	-0.505592	292	1.25636e-05	0.728048	0.853257
Collagenase 3	MMP-13	P45452	4322	MMP13	4925-54	SL000523	0.492284	0.111616	4.41051	0.218768	0.711052	0.273516	292	1.27436e-05	0.535983	0.732109
Coagulation factor IXab	Coagulation Factor IXab	P00740	2158	F9	5307-12	SL004400	-0.429123	0.097195	-4.41507	0.190502	-0.238621	-0.619625	292	1.3237e-05	0.615845	0.784758
CD5 antigen-like	CD5L	O43866	922	CD5L	3293-2	SL006108	0.260522	0.0589004	4.42309	0.115445	0.375967	0.145077	292	1.35969e-05	0.871299	0.933434
Transmembrane protein 132A	T132A	Q24JP5	54972	TMEM132A	7871-16	SL008988	0.36985	0.0845543	4.37412	0.165726	0.535576	0.204124	292	1.49247e-05	0.670383	0.818769
Endoplasmic reticulum aminopeptidase 2	LRAP	Q6P179	64167	ERAP2	8960-3	SL010614	-0.207198	0.0472669	-4.38357	0.0926432	-0.114555	-0.299841	292	1.55336e-05	0.868805	0.932097
B melanoma antigen 3	BAGE3	Q86Y29	85318	BAGE3	6442-6	SL017445	0.433241	0.0989339	4.37909	0.19391	0.627151	0.23933	292	1.55981e-05	0.63672	0.797947
Kit ligand	SCF	P21583	4254	KITLG	9377-25	SL002787	0.399692	0.0914138	4.37234	0.179171	0.578863	0.220521	292	1.57607e-05	0.681341	0.825434
R-spondin-1	RSPO1	Q2MKA7	284654	RSPO1	16614-27	SL017248	0.412336	0.0946244	4.35761	0.185464	0.5978	0.226873	292	1.68958e-05	0.603181	0.776647
Serum albumin	Albumin	P02768	213	ALB	18380-78	SL000254	0.482764	0.111401	4.33358	0.218345	0.701109	0.264418	292	1.75717e-05	0.332312	0.576465
Apolipoprotein A-IV	Apo A-IV	P06727	337	APOA4	17685-9	SL005129	-0.4833	0.111727	-4.32574	0.218984	-0.264316	-0.702284	292	1.88521e-05	0.49575	0.704095
Neuropeptide S	NPS	P0C0P6	594857	NPS	6390-18	SL012413	0.413531	0.0956728	4.32234	0.187519	0.60105	0.226012	292	1.98691e-05	0.65914	0.811874
Protein CREG1	CREG1	O75629	8804	CREG1	9357-4	SL008587	-0.430371	0.0994976	-4.32544	0.195015	-0.235355	-0.625386	292	2.027e-05	0.601425	0.775516
Interleukin-19	IL-19	Q9UHD0	29949	IL19	3035-80	SL004354	-0.363081	0.0839858	-4.32313	0.164612	-0.198469	-0.527693	292	2.05971e-05	0.679654	0.824411
Lactase-phlorizin hydrolase	LPH	P09848	3938	LCT	9017-58	SL018796	-0.373025	0.0866307	-4.30592	0.169796	-0.203229	-0.542821	292	2.07761e-05	0.697758	0.835319
UMP-CMP kinase	Cytidylate kinase	P30085	51727	CMPK1	18243-9	SL007871	0.631154	0.146549	4.30677	0.287237	0.918391	0.343917	292	2.15119e-05	0.179289	0.423426
T-cell surface antigen CD2	CD2	P06729	914	CD2	7100-31	SL004124	0.532639	0.124288	4.28553	0.243604	0.776243	0.289035	292	2.17257e-05	0.434653	0.659282
Neuronal growth regulator 1	NEGR1	Q7Z3B1	257194	NEGR1	7050-5	SL008810	0.527959	0.123161	4.28672	0.241396	0.769355	0.286562	292	2.1813e-05	0.414027	0.643449
Hepatocyte growth factor activator	HGFA	Q04756	3083	HGFAC	3617-80	SL006512	-0.252764	0.0587977	-4.29888	0.115244	-0.137521	-0.368008	292	2.26931e-05	0.880983	0.938607
Gelsolin	Gelsolin	P06396	2934	GSN	16607-78	SL005572	0.505218	0.118204	4.27412	0.23168	0.736898	0.273538	292	2.28421e-05	0.406116	0.637273
SLIT and NTRK-like protein 3	SLIK3	O94933	22865	SLITRK3	10565-19	SL017951	0.326909	0.0762489	4.2874	0.149448	0.476357	0.177461	292	2.31042e-05	0.746429	0.863961
Ectonucleotide pyrophosphatase/phosphodiesterase family member 2	ENPP2	Q13822	5168	ENPP2	16892-23	SL008778	-0.420088	0.0979583	-4.28843	0.191998	-0.228089	-0.612086	292	2.31363e-05	0.520926	0.721752
NEDD8-activating enzyme E1 regulatory subunit	ULA1	Q13564	8883	NAE1	18177-49	SL007410	0.569417	0.132365	4.30186	0.259436	0.828853	0.309981	292	2.33098e-05	0.360287	0.600239
Delta-aminolevulinic acid dehydratase	HEM2	P13716	210	ALAD	15523-9	SL008037	0.614179	0.143356	4.28429	0.280978	0.895157	0.333201	292	2.42867e-05	0.147545	0.384116
Serine protease inhibitor Kazal-type 7	ISK7	P58062	84651	SPINK7	10974-20	SL012454	0.461927	0.108162	4.2707	0.211997	0.673923	0.24993	292	2.59366e-05	0.485043	0.696451
Antithrombin-III	Antithrombin III	P01008	462	SERPINC1	3344-60	SL000272	0.580571	0.136648	4.24866	0.267831	0.848402	0.312741	292	2.59532e-05	0.291203	0.539632
NAD-dependent protein deacylase sirtuin-5, mitochondrial	SIRT5	Q9NXA8	23408	SIRT5	12461-8	SL013283	0.568384	0.133714	4.25075	0.262079	0.830463	0.306305	292	2.65671e-05	0.285113	0.533959
NHL repeat-containing protein 3	NHLC3	Q5JS37	387921	NHLRC3	9087-8	SL018837	0.42496	0.099219	4.28305	0.194469	0.619429	0.23049	292	2.65834e-05	0.607539	0.779448
NACHT, LRR and PYD domains-containing protein 10	NAL10	Q86W26		NLRP10	12821-6	SL019926	0.46112	0.108706	4.2419	0.213064	0.674184	0.248056	292	2.69968e-05	0.5495	0.741283
Dickkopf-related protein 3	DKK3	Q9UBP4	27122	DKK3	3607-71	SL009412	0.35685	0.0842375	4.23624	0.165105	0.521956	0.191745	292	2.70589e-05	0.628171	0.792572
Carbohydrate sulfotransferase 12	CHSTC	Q9NRB3	55501	CHST12	6626-81	SL017514	-0.427608	0.100967	-4.23511	0.197896	-0.229712	-0.625505	292	2.7119e-05	0.59748	0.772968
Small nuclear ribonucleoprotein F	RUXF	P62306	6636	SNRPF	5494-52	SL009790	0.565328	0.133309	4.24074	0.261285	0.826614	0.304043	292	2.80025e-05	0.378457	0.615189
Secretogranin-3	SCG3	Q8WXD2	29106	SCG3	7957-2	SL012750	0.358539	0.08506	4.21512	0.166718	0.525256	0.191821	292	3.00596e-05	0.695226	0.833802
Sushi, von Willebrand factor type A, EGF and pentraxin domain-containing protein 1	SVEP1	Q4LDE5	79987	SVEP1	11109-56	SL012540	-0.318208	0.0752619	-4.22801	0.147513	-0.170695	-0.465721	292	3.02648e-05	0.754214	0.868455
Bcl-2-like protein 2	Apoptosis regulator Bcl-W	Q92843	599	BCL2L2	13097-11	SL003774	0.567748	0.134012	4.23653	0.262664	0.830412	0.305084	292	3.0606e-05	0.347499	0.58949
GDH/6PGL endoplasmic bifunctional protein	G6PE	O95479	9563	H6PD	7161-25	SL018068	-0.28405	0.0674725	-4.20987	0.132246	-0.151804	-0.416296	292	3.15566e-05	0.797564	0.893064
CD320 antigen	CD320	Q9NPF0	51293	CD320	16320-139	SL009127	0.432557	0.10327	4.1886	0.202409	0.634967	0.230148	292	3.48968e-05	0.614053	0.783615
Protein FAM3B	FAM3B	P58499	54097	FAM3B	5618-50	SL007306	-0.606212	0.144632	-4.19141	0.283479	-0.322733	-0.889691	292	3.54489e-05	0.182793	0.427543
Nesprin-2	Nesprin-2	Q8WXH0	23224	SYNE2	9789-52	SL005755	0.660014	0.158247	4.1708	0.310163	0.970177	0.349851	292	3.69313e-05	0.0781875	0.27962
BRCA1-associated ATM activator 1	BRAT1	Q6PJG6	221927	BRAT1	10876-300	SL018839	0.317167	0.0761213	4.1666	0.149198	0.466365	0.167969	292	3.70886e-05	0.729232	0.853951
Gastric inhibitory polypeptide	GIP	P09681	2695	GIP	16292-288	SL011908	-0.541216	0.129514	-4.17882	0.253848	-0.287369	-0.795064	292	3.77719e-05	0.38484	0.620355
Kynureninase	KYNU	Q16719	8942	KYNU	4559-64	SL013969	-0.478474	0.115089	-4.15742	0.225575	-0.2529	-0.704049	292	3.8923e-05	0.479263	0.692288
Coagulation factor Xa	Coagulation Factor Xa	P00742	2159	F10	3077-66	SL003324	-0.340057	0.0813605	-4.17963	0.159467	-0.18059	-0.499523	292	3.90764e-05	0.69199	0.831859
DCN1-like protein 1	DCNL1	Q96GG9	54165	DCUN1D1	17366-6	SL010950	-0.403926	0.0970878	-4.16043	0.190292	-0.213634	-0.594218	292	3.91707e-05	0.597139	0.772748
ADP-ribosylation factor 5	ARF5	P84085	381	ARF5	18409-61	SL008833	0.572299	0.13742	4.16459	0.269344	0.841642	0.302955	292	4.02294e-05	0.308328	0.555273
Cathelicidin antimicrobial peptide	Cathelicidin peptide	P49913	820	CAMP	9384-17	SL009204	0.292057	0.0709157	4.11837	0.138995	0.431052	0.153062	292	4.43519e-05	0.823868	0.907672
HLA class II histocompatibility antigen, DR beta 3 chain	DRB3	P79483	3125	HLA-DRB3	6962-5	SL017963	0.540278	0.131079	4.12179	0.256914	0.797193	0.283364	292	4.47984e-05	0.341989	0.584798
Neogenin	NEO1	Q92859	4756	NEO1	8900-28	SL007582	0.347774	0.0843994	4.12058	0.165423	0.513197	0.182351	292	4.48527e-05	0.624261	0.790102
WAP, Kazal, immunoglobulin, Kunitz and NTR domain-containing protein 2	WFKN2	Q8TEU8	124857	WFIKKN2	3235-50	SL010391	0.321342	0.0780414	4.11758	0.152961	0.474303	0.168381	292	4.62741e-05	0.726064	0.852094
Alpha-amylase 2B	Alpha-amylase 2B	P19961	280	AMY2B	15556-49	SL005393	0.310891	0.0754504	4.12047	0.147883	0.458773	0.163008	292	4.68296e-05	0.764291	0.874237
Glutathione S-transferase A1	GST A1-1	P08263	2938	GSTA1	17138-8	SL005253	-0.465923	0.113275	-4.11322	0.222018	-0.243905	-0.687942	292	4.72391e-05	0.536945	0.732765
Collagen alpha-1(IX) chain	CO9A1	P20849	1297	COL9A1	15466-30	SL007148	0.381216	0.0925735	4.11798	0.181444	0.56266	0.199772	292	4.80266e-05	0.673985	0.820966
Integrin alpha-2	Integrin alpha-2	P17301	3673	ITGA2	15603-20	SL004086	0.392483	0.0953796	4.11495	0.186944	0.579427	0.205538	292	4.90841e-05	0.694445	0.833334
Allergin-1	MILR1	Q7Z6M3		MILR1	11173-29	SL019119	0.446416	0.108686	4.10739	0.213024	0.65944	0.233391	292	5.15163e-05	0.533472	0.730391
Prostaglandin-H2 D-isomerase	PGD2 synthase	P41222	5730	PTGDS	10514-5	SL005360	0.413906	0.101058	4.09571	0.198074	0.611981	0.215832	292	5.17614e-05	0.527586	0.726351
Carbonyl reductase [NADPH] 1	CBR1	P16152	873	CBR1	12381-26	SL008046	0.465166	0.113638	4.0934	0.222731	0.687897	0.242435	292	5.20723e-05	0.427429	0.653781
Semaphorin-3G	SEM3G	Q9NS98	56920	SEMA3G	5628-21	SL012850	-0.296467	0.0723822	-4.09585	0.141869	-0.154598	-0.438336	292	5.21306e-05	0.816498	0.903603
Hydroxymethylglutaryl-CoA synthase, mitochondrial	HMCS2	P54868	3158	HMGCS2	13704-5	SL014847	-0.458151	0.112088	-4.08743	0.219692	-0.238459	-0.677843	292	5.27996e-05	0.524455	0.724193
Plexin-A1	PLXA1	Q9UIW2	5361	PLXNA1	9005-16	SL011810	0.512961	0.125451	4.08893	0.245884	0.758845	0.267076	292	5.37916e-05	0.425405	0.652231
					9358-3		0.391456	0.0959385	4.08028	0.188039	0.579495	0.203417	292	5.62064e-05	0.665257	0.815633
Small ubiquitin-related modifier 2	SUMO2	P61956	6613	SUMO2	19555-1	SL013060	0.623529	0.15305	4.07402	0.299978	0.923507	0.323551	292	5.62318e-05	0.155409	0.394219
RNA polymerase II elongation factor ELL2	ELL2	O00472		ELL2	11494-4	SL019480	0.447974	0.110333	4.06019	0.216253	0.664227	0.231721	292	5.81805e-05	0.574195	0.757757
Cytochrome c	Cytochrome c	P99999	54205	CYCS	2942-50	SL000396	0.403752	0.0995794	4.05457	0.195176	0.598928	0.208576	292	5.82784e-05	0.595273	0.771539
Sorbitol dehydrogenase	Sorbitol dehydrogenase	Q00796	6652	SORD	15447-45	SL000574	-0.470273	0.115705	-4.0644	0.226782	-0.24349	-0.697055	292	5.94216e-05	0.423724	0.650941
Thymidylate kinase	KTHY	P23919	1841	DTYMK	19504-22	SL021087	0.630047	0.155445	4.05318	0.304673	0.934719	0.325374	292	5.99247e-05	0.0830435	0.288173
P-selectin glycoprotein ligand 1	SELPL	Q14242	6404	SELPLG	11266-8	SL007418	0.418266	0.1031	4.05688	0.202077	0.620343	0.216189	292	6.05449e-05	0.603469	0.776833
Heat shock 70 kDa protein 1A	HSP 70	P0DMV8	3303	HSPA1A	10749-18	SL000451	-0.477681	0.118035	-4.04694	0.231349	-0.246332	-0.70903	292	6.10534e-05	0.470945	0.686254
Ubiquitin carboxyl-terminal hydrolase 15	UBP15	Q9Y4E8	9958	USP15	19161-1	SL010976	0.605398	0.149363	4.0532	0.292751	0.898149	0.312647	292	6.23421e-05	0.0723769	0.269029
Tetratricopeptide repeat protein 9B	TTC9B	Q8N6N2	148014	TTC9B	9386-42	SL010981	0.414653	0.102547	4.04355	0.200991	0.615644	0.213661	292	6.35953e-05	0.642151	0.801343
Ubiquitin carboxyl-terminal hydrolase 14	UBP14	P54578	9097	USP14	19189-2	SL010983	0.617776	0.15285	4.04171	0.299586	0.917362	0.31819	292	6.43246e-05	0.0406879	0.201713
Asialoglycoprotein receptor 1	ASGR1	P07306	432	ASGR1	5452-71	SL008835	-0.499163	0.123576	-4.03932	0.242209	-0.256954	-0.741371	292	6.43497e-05	0.384059	0.619725
Sialic acid-binding Ig-like lectin 5	Siglec-5	O15389	8778	SIGLEC5	16792-4	SL005216	-0.149124	0.0368627	-4.04538	0.0722509	-0.0768728	-0.221374	292	6.46025e-05	0.944886	0.972052
Toll-like receptor 5	TLR5	O60602	7100	TLR5	18935-14	SL004493	-0.427369	0.105743	-4.04158	0.207256	-0.220113	-0.634625	292	6.47093e-05	0.436781	0.660894
Macrophage migration inhibitory factor	MIF	P14174	4282	MIF	8221-19	SL003080	0.450415	0.111565	4.03725	0.218667	0.669083	0.231748	292	6.6641e-05	0.518549	0.720103
ADP-ribosylation factor 1	ARF1	P84077	375	ARF1	19239-5	SL003998	0.506205	0.125949	4.01912	0.24686	0.753065	0.259345	292	6.86665e-05	0.41691	0.645686
Insulin-like growth factor I	IGF-I	P05019	3479	IGF1	2952-75	SL000047	0.270758	0.0674124	4.01645	0.132128	0.402887	0.13863	292	6.94516e-05	0.756799	0.869942
Interleukin-18 receptor 1	IL-18 Ra	Q13478	8809	IL18R1	14079-14	SL004152	-0.462769	0.115219	-4.01643	0.22583	-0.23694	-0.688599	292	6.97555e-05	0.53454	0.731122
fibromodulin	fibromodulin	Q06828	2331	FMOD	6367-66	SL004659	0.488325	0.121422	4.02172	0.237987	0.726312	0.250338	292	7.02946e-05	0.381151	0.617374
Protein LZIC	LZIC	Q8WZA0	84328	LZIC	19338-3	SL020950	0.594205	0.147817	4.01988	0.289721	0.883926	0.304485	292	7.04633e-05	0.200146	0.447376
Annexin A5	Annexin V	P08758	308	ANXA5	14158-17	SL003848	0.374439	0.0930596	4.02365	0.182397	0.556836	0.192042	292	7.04986e-05	0.690833	0.831163
Golgi-associated plant pathogenesis-related protein 1	GAPR1	Q9H4G4	152007	GLIPR2	15522-2	SL008305	0.404402	0.100837	4.01045	0.197641	0.602043	0.206762	292	7.07039e-05	0.605993	0.778456
Glucagon	Glucagon	P01275	2641	GCG	4891-50	SL000433	-0.539805	0.134391	-4.01667	0.263407	-0.276398	-0.803212	292	7.09088e-05	0.345202	0.587539
					6070-11		-0.435245	0.108467	-4.01269	0.212596	-0.22265	-0.647841	292	7.19569e-05	0.543763	0.737403
					8228-10		0.381719	0.0953412	4.00372	0.186869	0.568588	0.19485	292	7.2236e-05	0.632769	0.795468
Fibroblast growth factor-binding protein 3	FGFP3	Q8TAT2	143282	FGFBP3	11219-95	SL012727	0.383843	0.0956591	4.01261	0.187492	0.571335	0.196351	292	7.24655e-05	0.636795	0.797994
Dual specificity mitogen-activated protein kinase kinase 2	MP2K2	P36507	5605	MAP2K2	3628-3	SL010501	0.370834	0.0926788	4.00128	0.18165	0.552484	0.189183	292	7.45293e-05	0.579702	0.761382
Carnitine O-palmitoyltransferase 1, muscle isoform	CPT1B	Q92523	1375	CPT1B	11709-29	SL015112	0.468475	0.117046	4.0025	0.229409	0.697884	0.239065	292	7.49263e-05	0.472323	0.687257
					9535-14		0.522253	0.130776	3.9935	0.256321	0.778574	0.265933	292	7.4948e-05	0.284712	0.533584
Acyl-CoA-binding domain-containing protein 7	ACBD7	Q8N6N7	414149	ACBD7	13563-259	SL020184	0.417069	0.104117	4.00576	0.20407	0.621139	0.212999	292	7.55105e-05	0.617405	0.785751
Antileukoproteinase	SLPI	P03973	6590	SLPI	4413-3	SL001888	0.379188	0.0949972	3.99157	0.186194	0.565382	0.192993	292	7.65923e-05	0.550539	0.741983
Annexin A7	ANXA7	P20073	310	ANXA7	18244-1	SL008375	0.633008	0.158367	3.9971	0.310399	0.943408	0.322609	292	7.66304e-05	0.0634319	0.251857
C-reactive protein	CRP	P02741	1401	CRP	4337-49	SL000051	-0.427986	0.107552	-3.97934	0.210802	-0.217184	-0.638788	292	7.93301e-05	0.533777	0.730601
Neurogranin	NEUG	Q92686	4900	NRGN	18303-39	SL020951	0.642082	0.16139	3.97846	0.316324	0.958406	0.325759	292	8.15427e-05	0.0412735	0.203159
TP53-regulated inhibitor of apoptosis 1	TRIA1	O43715	51499	TRIAP1	18277-28	SL020910	0.466806	0.117087	3.98682	0.229491	0.696297	0.237315	292	8.24198e-05	0.502273	0.708712
HemK methyltransferase family member 2	HEMK2	Q9Y5N5	29104	N6AMT1	11096-57	SL018921	0.579043	0.145774	3.9722	0.285717	0.86476	0.293326	292	8.40816e-05	0.137583	0.370922
Alpha-(1,3)-fucosyltransferase 9	FUT9	Q9Y231	10690	FUT9	6991-24	SL006795	0.435555	0.1101	3.95598	0.215797	0.651351	0.219758	292	8.90476e-05	0.570453	0.755284
					11927-3		0.464097	0.117423	3.95237	0.230148	0.694246	0.233949	292	9.08283e-05	0.440778	0.663911
Beta-1,3-N-acetylglucosaminyltransferase radical fringe	RFNG	Q9Y644	5986	RFNG	7203-125	SL008366	0.453998	0.115191	3.94125	0.225775	0.679773	0.228223	292	9.22755e-05	0.539967	0.734825
Collectin-11	Collectin Kidney 1	Q9BWP8	78989	COLEC11	4430-44	SL006713	-0.27687	0.0701335	-3.94776	0.137462	-0.139408	-0.414332	292	9.48596e-05	0.766281	0.875375
Galactoside 3(4)-L-fucosyltransferase	Fucosyltransferase 3	P21217	2525	FUT3	4548-4	SL005575	-0.325165	0.0824932	-3.94172	0.161687	-0.163479	-0.486852	292	9.88671e-05	0.74784	0.864777
RGM domain family member B	RGMB	Q6NW40	285704	RGMB	3331-8	SL010468	0.315659	0.080214	3.93521	0.157219	0.472878	0.158439	292	9.96093e-05	0.714309	0.845168
Annexin A7	ANXA7	P20073	310	ANXA7	14203-3	SL008375	0.630315	0.160379	3.93016	0.314343	0.944658	0.315973	292	0.000100461	0.0441391	0.210093
Protein S100-P	S100P	P25815	6286	S100P	9926-4	SL004810	0.550448	0.140418	3.92006	0.27522	0.825669	0.275228	292	0.000100728	0.141108	0.375644
Neurotensin/neuromedin N	NEUT	P30990	4922	NTS	7857-22	SL012431	-0.450001	0.114931	-3.9154	0.225265	-0.224736	-0.675265	292	0.000105077	0.532695	0.729859
Aldehyde dehydrogenase, dimeric NADP-preferring	Aldehyde dehydrogenase, class 3	P30838	218	ALDH3A1	11480-1	SL006130	-0.432296	0.110443	-3.91419	0.216469	-0.215827	-0.648765	292	0.000107146	0.531128	0.728785
Hyaluronan and proteoglycan link protein 4	HPLN4	Q86UW8	404037	HAPLN4	6455-52	SL012650	-0.441281	0.112812	-3.91165	0.221112	-0.22017	-0.662393	292	0.000107606	0.57208	0.75636
ADP-ribosylation factor 6	ARF6	P62330	382	ARF6	12425-104	SL008834	0.564182	0.144685	3.89939	0.283583	0.847765	0.2806	292	0.000107793	0.206814	0.454768
Stomatin-like protein 1	STML1	Q9UBI4		STOML1	17344-23	SL018388	-0.526019	0.134359	-3.91502	0.263344	-0.262675	-0.789363	292	0.000108555	0.273007	0.522501
Protein SET	SET	Q01105	6418	SET	5364-7	SL007336	0.397514	0.102247	3.88777	0.200404	0.597918	0.197109	292	0.000112329	0.555564	0.745362
SPARC-related modular calcium-binding protein 1	SMOC1	Q9H4F8	64093	SMOC1	13118-5	SL011888	0.374335	0.0963363	3.88571	0.188819	0.563154	0.185516	292	0.000115805	0.596828	0.772547
Ephrin type-A receptor 5	EphA5	P54756	2044	EPHA5	3806-55	SL004844	0.423589	0.108908	3.88941	0.213461	0.63705	0.210129	292	0.00011829	0.522358	0.722744
Carbonic anhydrase 6	Carbonic anhydrase 6	P23280	765	CA6	3352-80	SL010288	0.210055	0.054033	3.88754	0.105905	0.31596	0.104151	292	0.000118485	0.750993	0.866599
Gamma-enolase	NSE	P09104	2026	ENO2	10339-48	SL001731	0.505488	0.130404	3.87634	0.255591	0.761079	0.249897	292	0.000121191	0.150771	0.388293
Steroid hormone receptor ERR1	ERRalpha	P11474	2101	ESRRA	9873-17	SL003804	0.444575	0.114497	3.88286	0.224414	0.668989	0.220161	292	0.000121338	0.539635	0.734598
ADP-ribosylation factor 4	ARF4	P18085	378	ARF4	18408-26	SL008052	0.568862	0.147124	3.86655	0.288363	0.857225	0.280499	292	0.000123856	0.14275	0.377822
Tumor necrosis factor-inducible gene 6 protein	TSG-6	P98066	7130	TNFAIP6	5036-50	SL004782	0.362925	0.0936439	3.87558	0.183542	0.546467	0.179383	292	0.00012492	0.571017	0.755657
Tissue factor pathway inhibitor	TFPI	P10646	7035	TFPI	3336-50	SL001998	-0.344049	0.0887721	-3.87564	0.173993	-0.170056	-0.518042	292	0.00012648	0.71291	0.84434
Programmed cell death 1 ligand 2	PD-L2	Q9BQ51	80380	PDCD1LG2	3004-67	SL004862	0.478209	0.123426	3.87445	0.241916	0.720124	0.236293	292	0.000126609	0.41299	0.642643
Nuclear transport factor 2	NTF-2	P61970	10204	NUTF2	19219-71	SL004942	0.570759	0.147486	3.86993	0.289072	0.859832	0.281687	292	0.000127416	0.138648	0.372355
Myelin protein P0	MYP0	P25189	4359	MPZ	10615-18	SL008066	0.420413	0.10872	3.86695	0.21309	0.633503	0.207323	292	0.000128717	0.509653	0.7139
ADP-ribosylation factor 3	ARF3	P61204	377	ARF3	12578-13	SL006497	0.448502	0.116135	3.86189	0.227625	0.676128	0.220877	292	0.00012883	0.519229	0.720575
Aminopeptidase B	AMPB	Q9H4A4	6051	RNPEP	12386-11	SL012837	0.442605	0.114148	3.87747	0.22373	0.666335	0.218875	292	0.000130692	0.468316	0.684336
Protein SCO1 homolog, mitochondrial	SCO1	O75880	6341	SCO1	7853-19	SL018291	0.544724	0.141464	3.85063	0.277268	0.821992	0.267455	292	0.000131087	0.241563	0.49149
NEDD8-conjugating enzyme Ubc12	UBC12	P61081	9040	UBE2M	19111-10	SL013053	0.452723	0.117572	3.8506	0.230441	0.683165	0.222282	292	0.000134693	0.504288	0.710132
Antibacterial protein LL-37	LL-37	P49913	820	CAMP	15481-45	SL004525	0.321479	0.0836985	3.84092	0.164049	0.485528	0.15743	292	0.000135043	0.722445	0.849968
Chloride intracellular channel protein 1	NCC27	O00299	1192	CLIC1	5013-2	SL004915	0.618506	0.160741	3.84784	0.315052	0.933558	0.303453	292	0.000135232	0.0156353	0.125041
Carboxypeptidase N subunit 2	CPN2	P22792	1585	CPN2	6415-90	SL017429	-0.265174	0.0688067	-3.8539	0.134861	-0.130313	-0.400036	292	0.00013708	0.837148	0.914958
Glia maturation factor gamma	GMFG	O60234	9535	GMFG	13062-4	SL016378	0.583059	0.151397	3.85118	0.296739	0.879797	0.28632	292	0.000138035	0.0577989	0.240414
Isthmin-1	ISM1	B1AKI9	140862	ISM1	8355-80	SL018469	0.456447	0.118947	3.83739	0.233137	0.689584	0.22331	292	0.00013848	0.493337	0.702379
Kinesin-like protein KIF22	KIF22	Q14807		KIF22	12734-112	SL019869	-0.431203	0.111974	-3.85091	0.21947	-0.211733	-0.650672	292	0.000138793	0.54833	0.740493
Sialic acid-binding Ig-like lectin 5	Siglec-5	O15389	8778	SIGLEC5	9275-2	SL005216	-0.167893	0.0436932	-3.84255	0.0856386	-0.0822544	-0.253532	292	0.000143245	0.94083	0.969964
Ragulator complex protein LAMTOR3	LTOR3	Q9UHA4		LAMTOR3	12490-92	SL019720	0.543882	0.142079	3.82803	0.278474	0.822356	0.265407	292	0.00014856	0.282337	0.531354
					8675-79		-0.37347	0.0979143	-3.81426	0.191912	-0.181558	-0.565383	292	0.00014949	0.579401	0.761184
CD166 antigen	ALCAM	Q13740	214	ALCAM	5451-1	SL003166	-0.359025	0.0938805	-3.82427	0.184006	-0.175019	-0.543031	292	0.000150318	0.62568	0.790999
Myosin light chain 6B	MYL6B	P14649	140465	MYL6B	14227-21	SL008040	0.360913	0.09437	3.82445	0.184965	0.545879	0.175948	292	0.000152281	0.637996	0.798747
CMRF35-like molecule 2	CLM2	Q496F6	342510	CD300E	10798-4	SL018456	0.365274	0.095795	3.81308	0.187758	0.553032	0.177516	292	0.000156651	0.646806	0.804243
Angiopoietin-related protein 7	ANGL7	O43827	10218	ANGPTL7	6371-50	SL007014	0.445447	0.116799	3.81379	0.228926	0.674373	0.216521	292	0.000156718	0.395447	0.628846
NKG2-F type II integral membrane protein	NKG2F	O43908	8302	KLRC4	10552-88	SL017983	0.482442	0.126339	3.81863	0.247625	0.730067	0.234818	292	0.00015774	0.409721	0.640094
Metalloproteinase inhibitor 2	TIMP-2	P16035	7077	TIMP2	2278-61	SL000592	0.422277	0.111217	3.79689	0.217985	0.640262	0.204292	292	0.000161648	0.422661	0.650124
Nucleosome assembly protein 1-like 1	NP1L1	P55209	4673	NAP1L1	13636-20	SL008135	0.596453	0.156909	3.80128	0.307541	0.903995	0.288912	292	0.000162394	0.0696652	0.263942
Annexin A10	ANX10	Q9UJ72	11199	ANXA10	13605-16	SL015314	0.458656	0.120847	3.79534	0.23686	0.695517	0.221796	292	0.000166887	0.484776	0.696258
C-C motif chemokine 25	TECK	O15444	6370	CCL25	2705-5	SL003197	-0.355038	0.0935999	-3.79314	0.183456	-0.171582	-0.538494	292	0.000167507	0.690513	0.830971
Acidic leucine-rich nuclear phosphoprotein 32 family member B	AN32B	Q92688	10541	ANP32B	4194-26	SL011769	0.469991	0.123518	3.80503	0.242096	0.712087	0.227895	292	0.000168036	0.364544	0.603775
Mannose-binding protein C	MBL	P11226	4153	MBL2	3000-66	SL004516	0.293181	0.0774998	3.78299	0.1519	0.445081	0.141281	292	0.00017508	0.746386	0.863936
Endothelial cell-selective adhesion molecule	ESAM	Q96AP7	90952	ESAM	7841-84	SL005160	0.524992	0.139416	3.76565	0.273256	0.798248	0.251737	292	0.00018701	0.284284	0.533183
Noelin-2	NOE2	O95897	93145	OLFM2	19377-14	SL012399	-0.264449	0.0699898	-3.7784	0.13718	-0.127269	-0.401629	292	0.00018723	0.774046	0.879799
Regulator of G-protein signaling 10	RGS10	O43665	6001	RGS10	11634-32	SL016376	0.582198	0.154598	3.76588	0.303012	0.88521	0.279186	292	0.000187725	0.0662258	0.257344
alpha-2-macroglobulin receptor-associated protein	RAP	P30533	4043	LRPAP1	3640-14	SL005263	0.423516	0.112894	3.75143	0.221273	0.644788	0.202243	292	0.000189145	0.518319	0.719944
Ubiquitin-conjugating enzyme E2 D4	UB2D4	Q9Y2X8		UBE2D4	13475-10	SL020116	0.608317	0.161668	3.76276	0.316869	0.925185	0.291448	292	0.000192253	0.0409316	0.202316
Complement factor I	Factor I	P05156	3426	CFI	2567-5	SL003328	-0.440221	0.117031	-3.76157	0.229381	-0.21084	-0.669601	292	0.000192612	0.472417	0.687326
Cysteine protease ATG4B	ATG4B	Q9Y4P1	23192	ATG4B	13629-25	SL020200	0.221724	0.0589809	3.75925	0.115603	0.337327	0.106122	292	0.000192964	0.895565	0.946343
Cysteine-rich with EGF-like domain protein 1	CREL1	Q96HD1	78987	CRELD1	7628-40	SL012774	-0.25465	0.0676995	-3.76148	0.132691	-0.121959	-0.387341	292	0.000199041	0.841282	0.917214
SLAM family member 7	SLAF7	Q9NQ25	57823	SLAMF7	5487-7	SL016928	-0.127447	0.0339763	-3.75106	0.0665935	-0.0608537	-0.194041	292	0.000202559	0.960155	0.979875
Annexin A11	ANX11	P50995	311	ANXA11	17513-11	SL008121	0.581743	0.155269	3.74669	0.304327	0.88607	0.277417	292	0.000205091	0.0767176	0.276979
AN1-type zinc finger protein 1	ZFAN1	Q8TCF1	79752	ZFAND1	19173-5	SL011267	0.580387	0.15542	3.73431	0.304624	0.88501	0.275763	292	0.000213997	0.0981585	0.313303
Glycoprotein Xg	XG	P55808	7499	XG	8044-90	SL018409	0.36184	0.0963847	3.75412	0.188914	0.550754	0.172926	292	0.000221898	0.658434	0.811439
Seizure 6-like protein	SEZ6L	Q9BYH1	23544	SEZ6L	19563-3	SL008781	0.294827	0.0792362	3.72086	0.155303	0.45013	0.139524	292	0.000222052	0.747341	0.864489
Proliferation-associated protein 2G4	PA2G4	Q9UQ80	5036	PA2G4	4258-15	SL008331	0.577913	0.155155	3.72474	0.304105	0.882018	0.273809	292	0.000223443	0.100474	0.316976
Copine-1	CPNE1	Q99829	8904	CPNE1	5346-24	SL011808	0.516217	0.138616	3.72409	0.271687	0.787904	0.24453	292	0.000226615	0.281954	0.530993
mRNA-decapping enzyme 1A	DCP1A	Q9NPI6		DCP1A	14008-22	SL020295	0.428746	0.11546	3.71339	0.226301	0.655047	0.202446	292	0.000233181	0.470261	0.685756
Platelet-derived growth factor receptor alpha	PDGFRA	P16234	5156	PDGFRA	10366-11	SL001728	0.358975	0.0961951	3.73174	0.188542	0.547518	0.170433	292	0.000233751	0.687854	0.82937
					10692-48		-0.475919	0.12807	-3.71609	0.251017	-0.224903	-0.726936	292	0.000237038	0.192945	0.439255
Proteasome subunit beta type-4	Proteasome beta chain	P28070	5692	PSMB4	18340-2	SL005691	0.418709	0.113038	3.70415	0.221554	0.640263	0.197155	292	0.00023852	0.381641	0.617771
Protein phosphatase 1A	Protein phophatase 2Ca	P35813	5494	PPM1A	12619-14	SL004719	0.540561	0.146384	3.69277	0.286912	0.827473	0.253649	292	0.000245551	0.167033	0.408697
Nucleolin	Nucleolin	P19338	4691	NCL	13655-34	SL005695	-0.459984	0.124347	-3.6992	0.24372	-0.216264	-0.703704	292	0.000249354	0.424096	0.651227
Insulin-like growth factor I	IGF-I	P05019	3479	IGF1	8406-17	SL000047	0.403924	0.10949	3.68914	0.214601	0.618525	0.189323	292	0.00025523	0.548478	0.740593
Sarcoplasmic/endoplasmic reticulum calcium ATPase 3	AT2A3	Q93084	489	ATP2A3	13510-7	SL011088	0.413692	0.112183	3.68764	0.219879	0.633571	0.193812	292	0.000255459	0.534143	0.730851
Neurogenic locus notch homolog protein 1	Notch 1	P46531	4851	NOTCH1	5107-7	SL005703	0.408799	0.111084	3.68011	0.217724	0.626523	0.191075	292	0.000255725	0.522677	0.722964
Protein phosphatase methylesterase 1	PPME1	Q9Y570	51400	PPME1	17852-5	SL011319	0.567473	0.155112	3.65847	0.30402	0.871493	0.263454	292	0.000255911	0	0
Oxytocin-neurophysin 1	NEU1	P01178	5020	OXT	8356-88	SL009326	-0.304691	0.0825901	-3.68919	0.161877	-0.142814	-0.466567	292	0.000255941	0.750148	0.866111
Nuclear pore membrane glycoprotein 210-like	P210L	Q5VU65	91181	NUP210L	9606-4	SL019046	0.393587	0.107199	3.67154	0.210111	0.603697	0.183476	292	0.000262925	0.550214	0.741764
Aldehyde dehydrogenase, mitochondrial	ALDH-E2	P05091	217	ALDH2	18381-16	SL004755	-0.474642	0.129335	-3.66987	0.253496	-0.221146	-0.728139	292	0.000269908	0.323911	0.569132
Phosphoribosyl pyrophosphate synthase-associated protein 2	KPRB	O60256	5636	PRPSAP2	19150-20	SL010935	0.552844	0.150929	3.66293	0.295821	0.848665	0.257022	292	0.000277923	0.0779378	0.279173
Alpha-amylase 1	Amylase, alpha 1A	P04745	276	AMY1A	7918-114	SL005114	0.213312	0.0581506	3.66828	0.113975	0.327287	0.0993372	292	0.000280669	0.84614	0.919859
Apolipoprotein C-I	Apo C-I	P02654	341	APOC1	15364-101	SL000275	0.421315	0.115278	3.65477	0.225945	0.64726	0.19537	292	0.000281637	0.448895	0.669996
SUMO-conjugating enzyme UBC9	UBC9	P63279	7329	UBE2I	2877-3	SL004306	0.59095	0.16149	3.65935	0.316521	0.907472	0.274429	292	0.000286665	0.0363353	0.190618
Prolactin-releasing peptide	PRRP	P81277	51052	PRLH	6543-182	SL012472	-0.464885	0.127673	-3.64121	0.25024	-0.214645	-0.715125	292	0.000291628	0.279987	0.529138
Myocardial zonula adherens protein	MYZAP	P0CAP1	100820829	MYZAP	9964-10	SL018834	0.324645	0.0889359	3.65032	0.174314	0.498959	0.15033	292	0.00029187	0.716889	0.846693
GTPase NRas	RASN	P01111	4893	NRAS	10531-18	SL010845	0.459595	0.126063	3.64575	0.247084	0.706679	0.212511	292	0.000300268	0.236337	0.486145
Splicing factor 3B subunit 4	SF3B4	Q15427		SF3B4	13449-25	SL020108	0.460769	0.126606	3.6394	0.248147	0.708916	0.212622	292	0.000301076	0.410155	0.640433
Inter-alpha-trypsin inhibitor heavy chain H2	ITI heavy chain H2	P19823	3698	ITIH2	9326-33	SL004711	0.374662	0.10301	3.63713	0.2019	0.576562	0.172761	292	0.000307493	0.592912	0.770008
Protein timeless homolog	TIMELESS	Q9UNS1	8914	TIMELESS	17699-43	SL015589	0.397712	0.109346	3.63719	0.214318	0.61203	0.183394	292	0.000307615	0.557112	0.746399
Retina-specific copper amine oxidase	Amine oxidase	O75106	314	AOC2	6434-18	SL002082	0.276827	0.0761137	3.63702	0.149183	0.42601	0.127644	292	0.000311025	0.778819	0.882507
Poly(rC)-binding protein 1	PCBP1	Q15365	5093	PCBP1	11458-30	SL016460	0.586356	0.161666	3.62697	0.316865	0.903221	0.269491	292	0.000317301	0.0290771	0.17052
L-Selectin	sL-Selectin	P14151	6402	SELL	4831-4	SL002823	0.259666	0.071613	3.62596	0.140361	0.400027	0.119305	292	0.000332964	0.788822	0.888157
Sialic acid synthase	SIAS	Q9NR45	54187	NANS	17802-4	SL020967	0.56729	0.156775	3.61849	0.30728	0.87457	0.260011	292	0.000335736	0.0588376	0.242565
Keratocan	KERA	O60938	11081	KERA	10758-2	SL012375	-0.459902	0.127596	-3.60437	0.250088	-0.209814	-0.70999	292	0.000341447	0.303347	0.550769
Gelsolin	Gelsolin	P06396	2934	GSN	4775-34	SL005572	0.495215	0.137598	3.59898	0.269693	0.764908	0.225522	292	0.000342576	0.235667	0.485455
Protein SGT1 homolog	SUGT1	Q9Y2Z0	10910	SUGT1	17818-22	SL021096	0.574083	0.159584	3.59736	0.312785	0.886868	0.261298	292	0.000354718	0.0386089	0.196491
Eukaryotic translation initiation factor 5A-1	eIF-5A-1	P63241	1984	EIF5A	5888-29	SL005687	0.584656	0.163174	3.58301	0.319822	0.904477	0.264834	292	0.000371592	0.0149518	0.122277
Eukaryotic initiation factor 4A-II	IF4A2	Q14240	1974	EIF4A2	18824-7	SL021460	0.560941	0.156309	3.58866	0.306366	0.867307	0.254575	292	0.000374243	0.113417	0.336774
Eukaryotic initiation factor 4A-I	IF4A1	P60842	1973	EIF4A1	18829-4	SL008140	0.566182	0.157921	3.58523	0.309524	0.875706	0.256658	292	0.000379084	0.0828663	0.287865
Tetranectin	Tetranectin	P05452	7123	CLEC3B	5701-81	SL001871	0.403477	0.112904	3.57362	0.221292	0.624769	0.182184	292	0.000380652	0.5602	0.748465
Myocilin	MYOC	Q99972	4653	MYOC	16558-2	SL008560	0.276333	0.0771616	3.58122	0.151237	0.42757	0.125096	292	0.000381426	0.696671	0.834668
TAR DNA-binding protein 43	TADBP	Q13148	23435	TARDBP	12046-51	SL011216	0.47313	0.132938	3.55901	0.260559	0.733689	0.212571	292	0.000401242	0.339109	0.582331
Transcription regulator protein BACH2	BACH2	Q9BYV9		BACH2	12756-3	SL019855	0.399201	0.112014	3.56385	0.219547	0.618748	0.179653	292	0.000406454	0.562165	0.749776
Cation-independent mannose-6-phosphate receptor	IGF-II receptor	P11717	3482	IGF2R	16057-6	SL003679	-0.297253	0.0835373	-3.55832	0.163733	-0.13352	-0.460986	292	0.00042675	0.728509	0.853527
Cholinesterase	Pseudocholinesterase	P06276	590	BCHE	15514-26	SL001814	-0.264868	0.0747036	-3.54558	0.146419	-0.118448	-0.411287	292	0.000430355	0.758328	0.87082
Zinc fingers and homeoboxes protein 1	ZHX1	Q9UKY1	11244	ZHX1	12751-26	SL015327	-0.379058	0.106639	-3.55458	0.209013	-0.170045	-0.58807	292	0.00043644	0.607696	0.779549
Follistatin-related protein 3	FSTL3	O95633	10272	FSTL3	3438-10	SL009324	-0.285554	0.0806981	-3.53855	0.158168	-0.127386	-0.443723	292	0.000438253	0.6206	0.787781
Tyrosine-protein kinase CSK	CSK	P41240	1445	CSK	3363-31	SL004781	0.5683	0.161341	3.52236	0.316228	0.884528	0.252072	292	0.000442171	0.00485404	0.069671
Protein MENT	CA056	Q9BUN1	54964	MENT	5744-12	SL017113	0.348463	0.0985996	3.53413	0.193255	0.541719	0.155208	292	0.000452011	0.576934	0.759561
Scavenger receptor class F member 2	SREC-II	Q96GP6	91179	SCARF2	8956-96	SL005222	0.356789	0.101083	3.52965	0.198123	0.554912	0.158665	292	0.000454699	0.495848	0.704164
N-acetylglucosamine-1-phosphotransferase subunit gamma	GNPTG	Q9UJJ9	84572	GNPTG	10666-7	SL012791	-0.404697	0.115088	-3.51641	0.225572	-0.179124	-0.630269	292	0.000476914	0.515514	0.717993
Importin subunit alpha-1	Karyopherin-a2	P52292	3838	KPNA2	2860-19	SL004718	0.347831	0.0990133	3.51297	0.194066	0.541897	0.153765	292	0.000489538	0.598994	0.773947
Ectodysplasin-A, secreted form	EDA	Q92838	1896	EDA	2826-53	SL004644	0.400763	0.114026	3.51468	0.22349	0.624253	0.177273	292	0.000493281	0.522957	0.723158
Glypican-3	Glypican 3	P51654	2719	GPC3	4842-62	SL000070	0.33011	0.0943136	3.50013	0.184855	0.514965	0.145256	292	0.000499203	0.66392	0.814813
Ecto-ADP-ribosyltransferase 4	ART4	Q93070	420	ART4	6576-1	SL004770	-0.301673	0.0861157	-3.50312	0.168787	-0.132887	-0.47046	292	0.000505282	0.744655	0.862934
DCN1-like protein 3	DCNL3	Q8IWE4		DCUN1D3	13553-4	SL020126	0.466667	0.133814	3.48743	0.262275	0.728942	0.204392	292	0.000513257	0.349123	0.590866
Adhesion G protein-coupled receptor F5	GP116	Q8IZF2	221395	ADGRF5	6409-57	SL017439	-0.235349	0.0673631	-3.49373	0.132032	-0.103317	-0.36738	292	0.000518247	0.843037	0.918171
SLIT and NTRK-like protein 1	SLIK1	Q96PX8	114798	SLITRK1	15539-15	SL008760	0.368103	0.105307	3.4955	0.206403	0.574505	0.1617	292	0.000520076	0.556768	0.746169
Keratin, type I cytoskeletal 16	Keratin-16	P08779	3868	KRT16	18905-5	SL005387	0.38891	0.111551	3.48637	0.218641	0.607551	0.170269	292	0.000548653	0.550417	0.741901
Tyrosine-protein kinase BTK	BTK	Q06187	695	BTK	19202-10	SL010521	0.53212	0.153408	3.46867	0.300679	0.832799	0.231441	292	0.000561197	0.0676636	0.260122
Hepcidin	LEAP-1	P81172	57817	HAMP	3504-58	SL004536	0.32359	0.0933201	3.46752	0.182907	0.506497	0.140682	292	0.000562181	0.630759	0.794204
N-terminal pro-BNP	N-terminal pro-BNP	P16860	4879	NPPB	7655-11	SL002785	0.354407	0.101895	3.47818	0.199713	0.554121	0.154694	292	0.000566558	0.536604	0.732533
Guanine nucleotide-binding protein G(k) subunit alpha	GNAI3	P08754	2773	GNAI3	12650-43	SL008873	0.477787	0.137707	3.4696	0.269905	0.747692	0.207882	292	0.00056877	0.267796	0.51749
Cytosolic 5'-nucleotidase 3A	5NT3	Q9H0P0	51251	NT5C3A	19615-213	SL013508	0.517321	0.149571	3.45869	0.29316	0.810481	0.224161	292	0.000572777	0.157565	0.396944
Translation initiation factor eIF-2B subunit alpha	EI2BA	Q14232	1967	EIF2B1	10080-9	SL019240	0.506592	0.146177	3.46562	0.286506	0.793098	0.220086	292	0.000573547	0.17854	0.42254
Programmed cell death protein 6	PDCD6	O75340	10016	PDCD6	19488-1	SL007980	0.483406	0.139798	3.4579	0.274003	0.757409	0.209403	292	0.000578323	0.276424	0.525761
Netrin receptor UNC5D	UNC5H4	Q6UXZ4	137970	UNC5D	16307-22	SL005231	0.359077	0.10356	3.46732	0.202978	0.562055	0.156099	292	0.000585105	0.567353	0.753228
Protocadherin gamma-C3	PCDGK	Q9UN70	5098	PCDHGC3	7859-21	SL008367	-0.440561	0.127356	-3.45928	0.249618	-0.190943	-0.690179	292	0.000597601	0.272175	0.521704
Ubiquitin-conjugating enzyme E2 variant 2	UB2V2	Q15819	7336	UBE2V2	18165-181	SL008564	0.558605	0.161633	3.45602	0.3168	0.875405	0.241805	292	0.000600223	0.0562846	0.237244
Transmembrane protease serine 11D	TM11D	O60235	9407	TMPRSS11D	6547-83	SL007017	-0.351377	0.101843	-3.45018	0.199613	-0.151764	-0.55099	292	0.000601168	0.529313	0.727539
Rho-related GTP-binding protein RhoC	RHOC	P08134	389	RHOC	17764-108	SL007087	0.522912	0.151544	3.45056	0.297027	0.81994	0.225885	292	0.000602849	0.116088	0.340718
Programmed cell death protein 5	TFAR19	O14737	9141	PDCD5	12517-52	SL003787	0.5124	0.148334	3.45437	0.290734	0.803134	0.221665	292	0.000604117	0.187368	0.43286
Serine/threonine-protein kinase pim-1	PIM1	P11309	5292	PIM1	5359-65	SL002702	0.410011	0.118848	3.44987	0.232943	0.642953	0.177068	292	0.000606067	0.479082	0.692158
Discoidin domain-containing receptor 2	Discoidin domain receptor 2	Q16832	4921	DDR2	15381-45	SL004120	0.37202	0.1077	3.45423	0.211092	0.583113	0.160928	292	0.000615165	0.468333	0.684348
Immunoglobulin-binding protein 1	IGBP1	P78318	3476	IGBP1	12358-6	SL007325	0.541624	0.157211	3.4452	0.308134	0.849758	0.23349	292	0.00062026	0.0835414	0.289035
Microtubule-associated protein RP/EB family member 3	MARE3	Q9UPY8		MAPRE3	16885-49	SL020106	0.54047	0.157496	3.43164	0.308692	0.849163	0.231778	292	0.000641002	0.0962423	0.310229
Neuronal pentraxin receptor	NPTXR	O95502	23467	NPTXR	15511-37	SL008970	0.377399	0.109573	3.44425	0.214764	0.592163	0.162635	292	0.000642216	0.554828	0.744867
WNT1-inducible-signaling pathway protein 3	WISP-3	O95389	8838	WISP3	5927-4	SL004690	0.419221	0.121982	3.43675	0.239084	0.658305	0.180137	292	0.000645928	0.48614	0.697237
Complement decay-accelerating factor	DAF	P08174	1604	CD55	5069-9	SL004556	0.302357	0.0881677	3.42934	0.172809	0.475166	0.129549	292	0.000648126	0.675229	0.821723
UV excision repair protein RAD23 homolog A	RD23A	P54725	5886	RAD23A	10058-1	SL013796	0.534096	0.15665	3.40948	0.307034	0.84113	0.227062	292	0.000649326	0	0
Transaldolase	Transaldolase	P37837	6888	TALDO1	11347-9	SL006113	0.446328	0.130017	3.43283	0.254834	0.701162	0.191494	292	0.00065418	0.354448	0.595355
Serine/threonine-protein kinase DCLK1	DCAK1	O15075	9201	DCLK1	17156-72	SL006399	0.358089	0.104062	3.44111	0.203962	0.56205	0.154127	292	0.000658457	0.613525	0.783278
Aldose reductase	Aldose reductase	P15121	231	AKR1B1	16606-85	SL003659	0.52441	0.153262	3.42166	0.300393	0.824804	0.224017	292	0.000670742	0.109483	0.330882
Glucokinase regulatory protein	GCKR	Q14397	2646	GCKR	5223-59	SL015728	-0.363128	0.106184	-3.41979	0.208121	-0.155007	-0.571248	292	0.000680029	0.603036	0.776554
Microtubule-associated proteins 1A/1B light chain 3B	MLP3B	Q9GZQ8		MAP1LC3B	11608-5	SL019511	0.517059	0.15147	3.4136	0.296882	0.813941	0.220177	292	0.000695177	0.129713	0.360157
Ankyrin repeat and SOCS box protein 9	ASB9	Q96DX5	140462	ASB9	19601-15	SL019725	0.356595	0.104301	3.41892	0.204429	0.561024	0.152166	292	0.000707587	0.32323	0.568533
Pancreatic alpha-amylase	Pancreatic alpha-amylase	P04746	279	AMY2A	18917-53	SL005382	0.282324	0.0829577	3.40323	0.162597	0.444921	0.119727	292	0.000723291	0.737776	0.858939
Magainin-2_XENLA	Magainin-2_XENLA	P11006	397766	magainins	8444-3	SL011504	0.320755	0.0940532	3.41036	0.184344	0.5051	0.136411	292	0.000723372	0.615012	0.784227
Annexin A4	annexin IV	P09525	307	ANXA4	17164-15	SL004211	0.504359	0.148607	3.39392	0.291269	0.795628	0.213091	292	0.000750948	0.186288	0.431611
Transgelin-2	Transgelin-2	P37802	8407	TAGLN2	11636-33	SL004811	0.481862	0.14214	3.39005	0.278594	0.760457	0.203268	292	0.000755744	0.0873283	0.295514
Alpha-N-acetylgalactosaminide alpha-2,6-sialyltransferase 6	SIA7F	Q969X2	30815	ST6GALNAC6	7228-2	SL018113	0.408875	0.120575	3.39103	0.236328	0.645203	0.172548	292	0.000761717	0.459121	0.677585
Uncharacterized protein C4orf32	CD032	Q8N8J7	132720	C4orf32	9490-3	SL019024	0.406706	0.119838	3.3938	0.234882	0.641588	0.171824	292	0.000764546	0.479115	0.692182
Cytosol aminopeptidase	LAP	P28838	51056	LAP3	13959-7	SL000499	0.528702	0.156004	3.38903	0.305768	0.83447	0.222934	292	0.000765958	0.0691311	0.262928
Amyloid beta A4 precursor protein-binding family B member 3	APBB3	O95704	10307	APBB3	13589-10	SL007058	0.366084	0.108161	3.38463	0.211995	0.578079	0.154089	292	0.000766635	0.578069	0.760308
Microtubule-associated proteins 1A/1B light chain 3A	MLP3A	Q9H492	84557	MAP1LC3A	17781-191	SL020985	0.484961	0.143348	3.3831	0.280962	0.765924	0.203999	292	0.000775472	0.229578	0.479143
Tumor necrosis factor receptor superfamily member 19	TAJ	Q9NS68	55504	TNFRSF19	5131-15	SL004863	0.33601	0.0991033	3.39051	0.194242	0.530253	0.141768	292	0.000776436	0.529914	0.727952
Growth hormone variant	SOM2	P01242	2689	GH2	10978-39	SL009327	0.432946	0.128537	3.36826	0.251933	0.684879	0.181014	292	0.000778429	0.415005	0.644209
					11860-3		0.31363	0.09258	3.38766	0.181457	0.495087	0.132173	292	0.000780384	0.676113	0.822261
Kunitz-type protease inhibitor 3	SPIT3	P49223	10816	SPINT3	7926-13	SL012439	0.212372	0.0629824	3.37192	0.123446	0.335817	0.0889264	292	0.000789045	0.360271	0.600226
Replication initiator 1	REPI1	Q9BWE0		REPIN1	13554-78	SL020118	0.358765	0.106365	3.37297	0.208475	0.56724	0.15029	292	0.000803871	0.599256	0.774116
Short-chain specific acyl-CoA dehydrogenase, mitochondrial	SCAD	P16219	35	ACADS	17393-13	SL005672	0.414633	0.122842	3.37532	0.240771	0.655404	0.173862	292	0.000804094	0.475467	0.689541
Ran-specific GTPase-activating protein	RANG	P43487	5902	RANBP1	18191-23	SL013039	0.526271	0.155987	3.3738	0.305735	0.832006	0.220536	292	0.000804176	0.115093	0.339254
Phosphatidylinositol 5-phosphate 4-kinase type-2 alpha	PI42A	P48426	5305	PIP4K2A	12697-30	SL010809	0.542738	0.161087	3.36922	0.315731	0.858469	0.227007	292	0.000805555	0.0366029	0.191319
Hyaluronan and proteoglycan link protein 1	HPLN1	P10915	1404	HAPLN1	3196-6	SL008023	-0.322631	0.0958332	-3.36659	0.187833	-0.134798	-0.510464	292	0.000816059	0.675056	0.821618
Semaphorin-4F	SEM4F	O95754	10505	SEMA4F	9932-49	SL019219	-0.309751	0.0919083	-3.37022	0.18014	-0.129611	-0.489892	292	0.000816828	0.601694	0.77569
Peptidyl-prolyl cis-trans isomerase FKBP3	FKBP3	Q00688	2287	FKBP3	18383-9	SL008165	0.531556	0.157659	3.37156	0.309011	0.840568	0.222545	292	0.000821673	0.054862	0.234226
Zinc finger protein 18	ZNF18	P17022		ZNF18	11372-2	SL019425	0.438101	0.130355	3.36084	0.255495	0.693596	0.182606	292	0.000821751	0.384105	0.619762
F-box/LRR-repeat protein 4	FBXL4	Q9UKA2	26235	FBXL4	11416-23	SL018669	0.426023	0.127182	3.34972	0.249276	0.675299	0.176747	292	0.000822962	0.408622	0.639236
Poly(ADP-ribose) glycohydrolase ARH3	ARHL2	Q9NX46	54936	ADPRHL2	17332-3	SL018690	0.523918	0.155574	3.36766	0.304924	0.828843	0.218994	292	0.000824832	0.0318073	0.178346
Prostasin	Prostasin	Q16651	5652	PRSS8	15513-108	SL003260	-0.377114	0.112318	-3.35757	0.220142	-0.156972	-0.597256	292	0.000825252	0.504901	0.710564
E3 ubiquitin-protein ligase RBBP6	RBBP6	Q7Z6E9	5930	RBBP6	9887-40	SL019143	0.467152	0.13864	3.36952	0.271735	0.738887	0.195417	292	0.000827314	0.213861	0.462451
Phosphatidylinositol 5-phosphate 4-kinase type-2 beta	PI42B	P78356	8396	PIP4K2B	18232-42	SL011212	0.542236	0.161293	3.3618	0.316134	0.85837	0.226101	292	0.000830348	0.0353596	0.188041
Transmembrane glycoprotein NMB	GPNMB	Q14956	10457	GPNMB	8289-8	SL007429	0.337108	0.100318	3.36039	0.196624	0.533732	0.140484	292	0.000832773	0.596058	0.772048
Vasodilator-stimulated phosphoprotein	VASP	P50552	7408	VASP	9762-14	SL011198	0.546808	0.163818	3.33791	0.321083	0.867891	0.225726	292	0.000840012	0	0
Appetite-regulating hormone	ghrelin	Q9UBU3	51738	GHRL	8447-11	SL004269	0.295555	0.0878763	3.36331	0.172238	0.467793	0.123318	292	0.000843839	0.707456	0.841104
Malectin	K0152	Q14165	9761	MLEC	6285-71	SL008682	0.526857	0.157013	3.3555	0.307745	0.834602	0.219112	292	0.000844004	0.0721275	0.268566
Low-density lipoprotein receptor-related protein 11	LRP11	Q86VZ4	84918	LRP11	15472-16	SL017588	-0.243274	0.0723631	-3.36186	0.141832	-0.101443	-0.385106	292	0.000846829	0.824906	0.908244
ATPase ASNA1	ASNA	O43681	439	ASNA1	13620-10	SL016377	0.494124	0.14776	3.3441	0.28961	0.783734	0.204514	292	0.000859402	0.226875	0.476314
Polycomb protein SCMH1	SCMH1	Q96GD3		SCMH1	12604-16	SL019785	0.378108	0.112522	3.36031	0.220543	0.598651	0.157565	292	0.000870255	0.441047	0.664113
Cysteine and glycine-rich protein 1	Cysteine-rich protein 1	P21291	1465	CSRP1	15529-33	SL001883	0.534799	0.159793	3.34683	0.313194	0.847993	0.221605	292	0.000872772	0.031144	0.176477
Uroporphyrinogen decarboxylase	DCUP	P06132	7389	UROD	19289-29	SL010986	0.481843	0.143662	3.35401	0.281577	0.76342	0.200266	292	0.000873218	0.195071	0.441668
Elongation factor 1-delta	EF1D	P29692	1936	EEF1D	17826-341	SL011186	0.541567	0.162082	3.34131	0.317681	0.859248	0.223885	292	0.000886323	0.0152552	0.123512
Uncharacterized protein C2orf66	CB066	Q6UXQ4	401027	C2orf66	5677-15	SL017102	-0.345672	0.10343	-3.3421	0.202722	-0.14295	-0.548394	292	0.000891884	0.5394	0.734439
Thiosulfate sulfurtransferase/rhodanese-like domain-containing protein 1	KAT	Q8NFU3	100131187	TSTD1	19277-4	SL013211	0.495436	0.148474	3.33685	0.29101	0.786446	0.204426	292	0.000894744	0.197915	0.444876
Neuropilin-2	Neuropilin-2	O60462	8828	NRP2	15387-44	SL005203	0.314095	0.0940487	3.33971	0.184336	0.498431	0.12976	292	0.000894907	0.63186	0.794896
Tyrosine-protein phosphatase non-receptor type 11	SHP-2	Q06124	5781	PTPN11	3397-7	SL010616	0.476288	0.142573	3.34065	0.279443	0.755731	0.196844	292	0.000902903	0.181364	0.425868
Syntaxin-1A	STX1a	Q16623	6804	STX1A	19553-14	SL004304	0.339459	0.102011	3.32768	0.199941	0.539401	0.139518	292	0.000916405	0.547683	0.740056
Golgi membrane protein 1	GOLM1	Q8NBJ4	51280	GOLM1	17456-53	SL010628	-0.288083	0.0865065	-3.33019	0.169553	-0.11853	-0.457636	292	0.000925726	0.729014	0.853823
Complement C1r subcomponent	C1r	P00736	715	C1R	3285-23	SL000310	0.441316	0.132704	3.32557	0.2601	0.701416	0.181217	292	0.000928208	0.270794	0.520379
Alpha-1-antichymotrypsin complex	alpha-1-antichymotrypsin complex	P01011	12	SERPINA3	4153-11	SL018548	0.393798	0.118434	3.32503	0.232131	0.625929	0.161667	292	0.000936258	0.436794	0.660904
CMP-N-acetylneuraminate-beta-galactosamide-alpha-2,3-sialyltransferase 1	SIA4A	Q11201	6482	ST3GAL1	5657-28	SL009528	0.370142	0.111011	3.33428	0.217582	0.587724	0.15256	292	0.000937478	0.54107	0.735575
Kelch-like ECH-associated protein 1	KEAP1	Q14145	9817	KEAP1	8485-7	SL017529	0.449928	0.135187	3.3282	0.264966	0.714893	0.184962	292	0.000957587	0.35161	0.592967
Galactokinase	GALK1	P51570	2584	GALK1	11448-34	SL016433	0.505832	0.152175	3.32402	0.298263	0.804095	0.207569	292	0.000957848	0.0577885	0.240392
C4a anaphylatoxin	C4a	P0C0L4 P0C0L5	720 721	C4A C4B	18821-9	SL000317	0.392336	0.11796	3.32601	0.231202	0.623538	0.161134	292	0.000962064	0.263312	0.513139
Piwi-like protein 1	PIWL1	Q96J94		PIWIL1	12793-4	SL019894	-0.338914	0.102074	-3.32029	0.200064	-0.13885	-0.538979	292	0.00097282	0.497367	0.705243
Lysosomal protective protein	Cathepsin A	P10619	5476	CTSA	3179-51	SL009213	-0.366766	0.110474	-3.31993	0.216529	-0.150237	-0.583296	292	0.00098256	0.538449	0.733791
Serine/threonine-protein phosphatase 2A 56 kDa regulatory subunit alpha isoform	2A5A	Q15172	5525	PPP2R5A	13622-16	SL014961	0.515856	0.15576	3.31187	0.305289	0.821145	0.210567	292	0.000985358	0.0678794	0.260537
Interleukin-31 receptor subunit alpha	IL31R	Q8NI17	133396	IL31RA	8273-84	SL007540	0.373868	0.112467	3.32424	0.220435	0.594303	0.153432	292	0.000986031	0.585751	0.765344
Complement factor H-related protein 1	FHR1	Q03591	100293069	CFHR1	15468-14	SL002690	-0.249552	0.0754838	-3.30603	0.147948	-0.101604	-0.3975	292	0.00100017	0.754371	0.868545
Coagulation Factor X	Coagulation Factor X	P00742	2159	F10	4878-3	SL000360	-0.318828	0.0961624	-3.31551	0.188478	-0.130349	-0.507306	292	0.00101534	0.62552	0.790898
Persulfide dioxygenase ETHE1, mitochondrial	ETHE1	O95571	23474	ETHE1	3847-56	SL011532	0.291243	0.0879936	3.30982	0.172467	0.46371	0.118776	292	0.00101937	0.729385	0.85404
Glucosidase 2 subunit beta	GLU2B	P14314	5589	PRKCSH	5687-5	SL008641	0.509723	0.154568	3.29773	0.302953	0.812676	0.20677	292	0.00102213	0.120828	0.347604
Laminin subunit gamma-2	Laminin gamma-2	Q13753	3918	LAMC2	9580-5	SL005798	-0.318691	0.0964941	-3.3027	0.189128	-0.129562	-0.507819	292	0.00102361	0.610876	0.781586
RuvB-like 1	RUVB1	Q9Y265	8607	RUVBL1	12365-108	SL009453	0.448744	0.13602	3.2991	0.266599	0.715343	0.182144	292	0.0010325	0.319467	0.565214
26S proteasome non-ATPase regulatory subunit 4	PSMD4	P55036	5710	PSMD4	13568-30	SL011203	0.496492	0.150876	3.29073	0.295717	0.79221	0.200775	292	0.00103558	0.158559	0.398194
Tripeptidyl-peptidase 1	TPP1	O14773	1200	TPP1	17691-1	SL007957	-0.382065	0.115823	-3.29868	0.227014	-0.155051	-0.609079	292	0.00106111	0.479769	0.692653
Beta-microseminoprotein	PSP-94	P08118	4477	MSMB	10620-21	SL000548	0.221644	0.0672234	3.29712	0.131758	0.353402	0.0898861	292	0.00106874	0.670056	0.818569
Rab GDP dissociation inhibitor alpha	RhoGDI	P31150	2664	GDI1	16810-3	SL002794	0.507842	0.154375	3.28966	0.302575	0.810417	0.205267	292	0.00107048	0.060842	0.246662
Spastin	Spastin	Q9UBP0	6683	SPAST	8388-24	SL005753	-0.352562	0.107277	-3.28645	0.210263	-0.142298	-0.562825	292	0.00108111	0.542945	0.736848
Serine protease 57	PRS57	Q6UWY2	400668	PRSS57	8351-17	SL018485	0.256005	0.0779262	3.28522	0.152735	0.40874	0.10327	292	0.00108818	0.693946	0.833034
Transcription elongation factor A protein-like 8	TCAL8	Q8IYN2	90843	TCEAL8	19109-32	SL006632	-0.380358	0.115844	-3.28337	0.227054	-0.153304	-0.607412	292	0.00109204	0.468149	0.684214
Cartilage acidic protein 1	CRAC1	Q9NQ79	55118	CRTAC1	5632-6	SL012846	0.257872	0.0785016	3.28493	0.153863	0.411735	0.104009	292	0.0010967	0.682711	0.826263
14-3-3 protein gamma	14-3-3 protein gamma	P61981	7532	YWHAG	4179-57	SL004989	0.523993	0.159619	3.28277	0.312853	0.836846	0.21114	292	0.00110305	0.0563082	0.237293
Septin-10	Sep-10	Q9P0V9		Sep-10	12690-33	SL019825	0.373439	0.11379	3.28182	0.223028	0.596467	0.15041	292	0.00110878	0.488575	0.698981
Ras-related protein Rab-13	RAB13	P51153	5872	RAB13	19282-3	SL008534	0.46356	0.14169	3.27164	0.277713	0.741274	0.185847	292	0.00112685	0.202674	0.450194
Chymotrypsin-like elastase family member 2A	ELA2A	P08217	63036	CELA2A	7140-1	SL012410	-0.371646	0.113344	-3.27891	0.222155	-0.149491	-0.5938	292	0.00115135	0.487584	0.698272
Casein kinase II 2-alpha':2-beta heterotetramer	CK2-A2:B	P19784 P67870	1459 1460	CSNK2A2 CSNK2B	5226-36	SL016551	0.467434	0.143112	3.26621	0.2805	0.747934	0.186934	292	0.00116216	0.237126	0.486956
Inhibin beta A chain	Inhibin bA chain	P08476	3624	INHBA	13738-8	SL001932	-0.413404	0.127281	-3.24796	0.249471	-0.163933	-0.662874	292	0.00118928	0.384878	0.620386
Zinc finger protein 329	ZN329	Q86UD4		ZNF329	12803-9	SL019911	-0.433683	0.133033	-3.25996	0.260745	-0.172938	-0.694427	292	0.00119714	0.35322	0.594323
Leukocyte immunoglobulin-like receptor subfamily B member 1	ILT-2	Q8NHL6	10859	LILRB1	5090-49	SL005190	-0.16898	0.0519972	-3.24979	0.101914	-0.0670652	-0.270894	292	0.00120103	0.89152	0.944203
Mitofusin-1	MFN1	Q8IWA4		MFN1	11364-18	SL019424	0.375197	0.114835	3.26726	0.225077	0.600274	0.150119	292	0.00120563	0.468742	0.684647
IQ domain-containing protein F1	IQCF1	Q8N6M8	132141	IQCF1	7991-54	SL018364	-0.445187	0.137227	-3.24416	0.268965	-0.176221	-0.714152	292	0.00122344	0.174518	0.417754
Leucine-rich repeat transmembrane neuronal protein 4	LRRT4	Q86VH4	80059	LRRTM4	6572-10	SL017483	-0.305177	0.0940099	-3.24622	0.184259	-0.120918	-0.489436	292	0.00124229	0.689716	0.830491
Ecto-ADP-ribosyltransferase 3	NAR3	Q13508	419	ART3	7970-315	SL018330	0.232783	0.0717602	3.24391	0.14065	0.373433	0.0921335	292	0.00124806	0.676492	0.822491
Dual adapter for phosphotyrosine and 3-phosphotyrosine and 3-phosphoinositide	DAPP1	Q9UN19	27071	DAPP1	11615-16	SL016537	0.480837	0.148294	3.24247	0.290656	0.771493	0.190182	292	0.00124869	0.0987332	0.314218
GMP reductase 2	GMPR2	Q9P2T1	51292	GMPR2	19446-1	SL020976	0.475659	0.146521	3.24635	0.287181	0.762841	0.188478	292	0.00125022	0.207789	0.455838
Insulin-degrading enzyme	IDE	P14735	3416	IDE	3197-70	SL007122	0.470451	0.145219	3.23959	0.28463	0.755081	0.185822	292	0.00126345	0.234543	0.484297
Tenascin-X	Tenascin-X	P22105	7148	TNXB	5698-60	SL005005	0.244219	0.0755387	3.23303	0.148056	0.392275	0.0961627	292	0.00126429	0.72878	0.853686
Heat shock 70 kDa protein 1B	HS71B	P0DMV9	3304	HSPA1B	18901-26	SL021233	-0.412617	0.127542	-3.23515	0.249982	-0.162635	-0.662599	292	0.00127625	0.419971	0.648052
Histidine--tRNA ligase, cytoplasmic	Histidyl-tRNA synthetase	P12081	3035	HARS	17450-51	SL006248	0.501149	0.155031	3.23258	0.303861	0.80501	0.197289	292	0.00129659	0.0693005	0.26325
Proto-oncogene tyrosine-protein kinase Src isoform 2	SRCN1	P12931	6714	SRC	5488-74	SL010516	0.507334	0.157081	3.22976	0.307878	0.815212	0.199455	292	0.00129843	0.057455	0.239698
AP-1 complex subunit sigma-2	AP1S2	P56377	8905	AP1S2	18405-117	SL006495	0.434599	0.134663	3.2273	0.26394	0.698539	0.170659	292	0.00130792	0.271725	0.521273
E3 ubiquitin-protein ligase RNF128	RN128	Q8TEB7	79589	RNF128	6510-56	SL017466	0.389173	0.120706	3.22414	0.236584	0.625757	0.152589	292	0.00131128	0.483118	0.695067
Cytosolic endo-beta-N-acetylglucosaminidase	ENASE	Q8NFI3	64772	ENGASE	16781-2	SL012928	-0.296705	0.0916226	-3.23833	0.17958	-0.117124	-0.476285	292	0.00131285	0.695407	0.833911
Sialic acid-binding Ig-like lectin 12	SIG12	Q96PQ1	89858	SIGLEC12	10037-98	SL018490	-0.268089	0.0829952	-3.23017	0.162671	-0.105418	-0.43076	292	0.00132864	0.768069	0.876395
E3 ubiquitin-protein ligase ZNRF3	ZNRF3	Q9ULT6	84133	ZNRF3	14122-132	SL018971	0.301803	0.0932978	3.23483	0.182864	0.484666	0.118939	292	0.00133553	0.714186	0.845095
Peptidyl-prolyl cis-trans isomerase FKBP7	FKBP7	Q9Y680	51661	FKBP7	9288-7	SL017255	0.479842	0.149202	3.21607	0.292435	0.772277	0.187407	292	0.00135703	0.170643	0.413089
Protein FAM177A1	F177A	Q8N128	283635	FAM177A1	8039-41	SL018368	0.390136	0.121576	3.20898	0.23829	0.628426	0.151846	292	0.00136911	0.455785	0.675119
Synaptotagmin-like protein 1	SYTL1	Q8IYJ3		SYTL1	12892-10	SL019931	-0.364432	0.113561	-3.20913	0.222579	-0.141853	-0.587011	292	0.00137219	0.430211	0.655905
Leucine-rich repeat and transmembrane domain-containing protein 2	LRTM2	Q8N967	654429	LRTM2	8906-60	SL018698	0.399419	0.124141	3.21746	0.243317	0.642736	0.156103	292	0.00137379	0.420761	0.648661
Protein FAM151A	F151A	Q8WW52	338094	FAM151A	7856-51	SL018294	-0.212028	0.0660124	-3.21193	0.129384	-0.0826432	-0.341412	292	0.00138713	0.787976	0.88768
Death-associated protein kinase 2	DAPK2	Q9UIK4	23604	DAPK2	4355-13	SL007752	0.470793	0.146439	3.21494	0.287021	0.757814	0.183772	292	0.00138898	0.214738	0.463399
Alkaline phosphatase, tissue-nonspecific isozyme	Alkaline phosphatase, liver	P05186	249	ALPL	16926-44	SL000255	-0.323489	0.100423	-3.22125	0.19683	-0.126659	-0.520319	292	0.00139138	0.649447	0.805882
Integrin beta-2	LFA-1 beta-2	P05107	3689	ITGB2	12750-9	SL004122	-0.362298	0.11304	-3.20506	0.221557	-0.140741	-0.583856	292	0.00139199	0.412407	0.642189
Homeodomain-interacting protein kinase 3	HIPK3	Q9H422	10114	HIPK3	19329-31	SL010523	0.347758	0.108452	3.20656	0.212566	0.560324	0.135192	292	0.00140383	0.590191	0.768239
UV excision repair protein RAD23 homolog B	RD23B	P54727	5887	RAD23B	12522-6	SL011201	0.526256	0.164968	3.19004	0.323338	0.849593	0.202918	292	0.00140937	0	0
Putative D-tyrosyl-tRNA(Tyr) deacylase 2	DTD2	Q96FN9	112487	DTD2	18280-29	SL020956	0.49856	0.155366	3.20894	0.304517	0.803077	0.194043	292	0.00142199	0.116551	0.341395
SPRY domain-containing SOCS box protein 1	SPSB1	Q96BD6		SPSB1	13942-140	SL020269	-0.423451	0.132273	-3.20134	0.259255	-0.164196	-0.682707	292	0.00144604	0.187474	0.432982
Peflin	PEF1	Q9UBV8	553115	PEF1	19272-9	SL008547	0.296928	0.0929507	3.19446	0.182183	0.479111	0.114744	292	0.001449	0.66328	0.81442
Zinc finger protein 180	ZN180	Q9UJW8	7733	ZNF180	12771-19	SL011309	-0.384669	0.12	-3.20557	0.2352	-0.149468	-0.619869	292	0.00145295	0.467776	0.683941
Leucine-rich repeat transmembrane protein FLRT2	FLRT2	O43155	23768	FLRT2	13122-19	SL008360	0.372932	0.116399	3.20391	0.228142	0.601075	0.14479	292	0.00145898	0.476394	0.690213
Tumor necrosis factor receptor superfamily member 17	BCMA	Q02223	608	TNFRSF17	2665-26	SL004672	0.194508	0.0607544	3.20155	0.119079	0.313587	0.0754296	292	0.00146857	0.822415	0.906871
Phosphoribosyl pyrophosphate synthase-associated protein 1	KPRA	Q14558	5635	PRPSAP1	9478-69	SL009434	0.488439	0.152823	3.19611	0.299533	0.787972	0.188905	292	0.00147414	0.124356	0.352641
Bis(5'-nucleosyl)-tetraphosphatase [asymmetrical]	AP4A	P50583	318	NUDT2	16583-8	SL020189	0.469738	0.147058	3.19424	0.288233	0.757971	0.181505	292	0.00148851	0.164851	0.406019
Keratin, type I cytoskeletal 17	Keratin 17	Q04695	3872	KRT17	12923-51	SL005401	0.367885	0.11498	3.19957	0.22536	0.593245	0.142525	292	0.00148866	0.551433	0.742585
dCTP pyrophosphatase 1	XTP3A	Q9H773	79077	DCTPP1	4314-12	SL011809	0.402095	0.125852	3.195	0.246669	0.648764	0.155427	292	0.00148945	0.384815	0.620335
Retinoic acid receptor responder protein 2	TIG2	Q99969	5919	RARRES2	3079-62	SL005152	-0.382183	0.120046	-3.18364	0.23529	-0.146893	-0.617473	292	0.00149535	0.387506	0.6225
BDNF/NT-3 growth factors receptor	TrkB	Q16620	4915	NTRK2	4866-59	SL004160	0.424397	0.13321	3.18592	0.261092	0.685488	0.163305	292	0.0015047	0.329181	0.573743
PEST proteolytic signal-containing nuclear protein	PCNP	Q8WW12	57092	PCNP	17769-28	SL013223	0.494264	0.154924	3.19036	0.303651	0.797915	0.190613	292	0.00151298	0.101732	0.318954
Ras-related protein Rab-5B	RAB5B	P61020	5869	RAB5B	19222-124	SL008540	0.504877	0.158727	3.18078	0.311105	0.815982	0.193772	292	0.00154277	0.0571075	0.238972
					14308-192		0.368107	0.115949	3.17473	0.22726	0.595367	0.140846	292	0.00154488	0.544986	0.738232
Serine/threonine-protein kinase 24	STK24	Q9Y6E0	8428	STK24	12617-2	SL008369	0.499734	0.157182	3.17934	0.308076	0.80781	0.191657	292	0.00155132	0.0395918	0.198977
Heat shock 70 kDa protein 1A	HSP 70	P0DMV8	3303	HSPA1A	10803-22	SL000451	-0.369045	0.116178	-3.17653	0.22771	-0.141335	-0.596754	292	0.00155263	0.488872	0.699194
Tartrate-resistant acid phosphatase type 5	TrATPase	P13686	54	ACP5	3232-28	SL004118	-0.265934	0.0834659	-3.18614	0.163593	-0.10234	-0.429527	292	0.00157445	0.627675	0.792259
Probable ATP-dependent RNA helicase DDX58	DDX58	O95786		DDX58	12382-2	SL019687	0.406798	0.128399	3.16824	0.251661	0.658459	0.155137	292	0.00161256	0.411616	0.641573
Inter-alpha-trypsin inhibitor heavy chain H1	ITI heavy chain H1	P19827	3697	ITIH1	7955-195	SL004710	0.256082	0.0807122	3.17278	0.158196	0.414278	0.097886	292	0.00161586	0.734361	0.856949
Heterogeneous nuclear ribonucleoprotein K	hnRNP K	P61978	3190	HNRNPK	19333-4	SL002756	0.519467	0.165009	3.14811	0.323418	0.842886	0.196049	292	0.00162638	0	0
Protein kinase C gamma type	PKC-G	P05129	5582	PRKCG	5476-66	SL000556	-0.31018	0.0976557	-3.17626	0.191405	-0.118775	-0.501585	292	0.00163897	0.436068	0.660354
BMP-binding endothelial regulator protein	BMPER	Q8N8U9	168667	BMPER	15368-3	SL007531	-0.376897	0.119448	-3.15532	0.234118	-0.142779	-0.611015	292	0.00164904	0.48939	0.699564
					9804-11		0.189528	0.0599803	3.15984	0.117561	0.307089	0.0719665	292	0.00166356	0.848687	0.921242
Contactin-associated protein-like 5	CNTP5	Q8WYK1	129684	CNTNAP5	9044-1	SL018802	0.328234	0.103626	3.16748	0.203107	0.531341	0.125126	292	0.00168221	0.627733	0.792296
Gamma-glutamyl hydrolase	GGH	Q92820	8836	GGH	9370-69	SL006682	-0.27532	0.0869015	-3.16818	0.170327	-0.104993	-0.445646	292	0.00168713	0.721436	0.849374
Bifunctional heparan sulfate N-deacetylase/N-sulfotransferase 1	NDST1	P52848	3340	NDST1	6927-7	SL017913	-0.298475	0.0944601	-3.1598	0.185142	-0.113333	-0.483617	292	0.0017073	0.654801	0.809198
Cathepsin F	CATF	Q9UBX1	8722	CTSF	9212-22	SL008381	-0.324145	0.102588	-3.15969	0.201072	-0.123073	-0.525217	292	0.00172695	0.649013	0.805614
Leukocyte immunoglobulin-like receptor subfamily A member 3	LIRA3	Q8N6C8	11026	LILRA3	6391-52	SL012696	-0.15369	0.0487877	-3.15019	0.0956238	-0.0580664	-0.249314	292	0.00173857	0.907317	0.952532
Proteasome subunit beta type-9	PSB9	P28065	5698	PSMB9	18942-11	SL016413	0.421483	0.134113	3.14275	0.262861	0.684344	0.158621	292	0.00174933	0.365785	0.604802
Nuclear pore complex protein Nup98-Nup96	NUP98	P52948		NUP98	12772-8	SL019857	-0.296804	0.0943966	-3.14422	0.185017	-0.111786	-0.481821	292	0.00174999	0.668696	0.817739
Endophilin-B2	SHLB2	Q9NR46	56904	SH3GLB2	18222-34	SL015535	0.450612	0.143162	3.14758	0.280597	0.731209	0.170015	292	0.00175268	0.115341	0.339619
14 kDa phosphohistidine phosphatase	PHP14	Q9NRX4	29085	PHPT1	16882-27	SL008943	0.443117	0.140668	3.15009	0.275709	0.718827	0.167408	292	0.00175367	0.064765	0.25449
Sepiapterin reductase	SPRE	P35270	6697	SPR	9287-6	SL008541	0.329004	0.104713	3.14197	0.205237	0.534241	0.123767	292	0.00176184	0.57253	0.756657
Chordin-like protein 1	CRDL1	Q9BU40	91851	CHRDL1	3362-61	SL009400	0.354565	0.112713	3.14574	0.220917	0.575483	0.133648	292	0.00176944	0.338303	0.581638
Haptoglobin	Haptoglobin, Mixed Type	P00738	3240	HP	3054-3	SL000437	-0.226666	0.0719513	-3.15027	0.141025	-0.0856416	-0.367691	292	0.00177317	0.785182	0.886105
Ataxin-3	ATX3	P54252	4287	ATXN3	16825-20	SL018716	0.467057	0.148766	3.13954	0.291582	0.758639	0.175475	292	0.00179384	0.0602122	0.245382
Nuclear receptor ROR-beta	RORB	Q92753	6096	RORB	12483-62	SL007576	0.39038	0.124569	3.13384	0.244156	0.634536	0.146224	292	0.00181835	0.439031	0.662594
Choline/ethanolamine kinase	CHKB	Q9Y259	1120	CHKB	7761-125	SL018256	0.390199	0.124262	3.14012	0.243554	0.633753	0.146645	292	0.00181856	0.390418	0.624834
Xaa-Pro aminopeptidase 1	XPNPEP1	Q9NQW7	7511	XPNPEP1	3481-87	SL011073	0.485952	0.155957	3.11594	0.305675	0.791627	0.180277	292	0.00183384	0.00200301	0.044755
Leucine carboxyl methyltransferase 1	LCMT1	Q9UIC8	51451	LCMT1	4237-70	SL011770	0.42771	0.136664	3.12965	0.267861	0.695571	0.159848	292	0.00183868	0.31905	0.564845
NT-3 growth factor receptor	TrkC	Q16288	4916	NTRK3	2658-27	SL004639	0.367349	0.117453	3.12762	0.230208	0.597557	0.137141	292	0.00184568	0.395903	0.629209
NKG2-E type II integral membrane protein	NKG2E	Q07444	3823	KLRC3	11571-75	SL018232	0.363746	0.11635	3.12631	0.228046	0.591791	0.1357	292	0.00188551	0.503502	0.709579
Nucleoside diphosphate kinase B	NDP kinase B	P22392	4831	NME2	4249-64	SL004921	0.489669	0.156927	3.12036	0.307577	0.797246	0.182092	292	0.00189961	0.0414778	0.203661
Cathepsin B	Cathepsin B	P07858	1508	CTSB	8007-19	SL000343	0.254873	0.0815763	3.12435	0.15989	0.414763	0.0949838	292	0.00191314	0.74731	0.864471
Tyrosine--tRNA ligase, cytoplasmic	SYYC	P54577	8565	YARS	19270-26	SL007285	0.48266	0.154871	3.11652	0.303548	0.786207	0.179112	292	0.00192272	0.0769208	0.277346
Glycine cleavage system H protein, mitochondrial	GCSH	P23434	2653	GCSH	10956-82	SL009212	0.326914	0.104965	3.1145	0.205731	0.532645	0.121182	292	0.00193209	0.593135	0.770153
ATP-dependent RNA helicase DHX8	DHX8	Q14562		DHX8	11601-26	SL019516	-0.293589	0.0944619	-3.10801	0.185145	-0.108443	-0.478734	292	0.00197126	0.676021	0.822205
Fc receptor-like protein 5	FCRL5	Q96RD9	83416	FCRL5	6103-70	SL012789	0.338716	0.109103	3.10454	0.213842	0.552558	0.124873	292	0.00198169	0.561334	0.749222
Ras-related protein Rab-1A	RAB1A	P62820	5861	RAB1A	19223-6	SL010834	0.462419	0.149152	3.10032	0.292338	0.754757	0.170081	292	0.00199957	0.138021	0.371511
Amyloid beta A4 precursor protein-binding family B member 1	APBB1	O00213	322	APBB1	12822-34	SL006959	0.430065	0.138623	3.10241	0.2717	0.701765	0.158364	292	0.00201849	0.277704	0.526976
Dual specificity mitogen-activated protein kinase kinase 1	MEK1	Q02750	5604	MAP2K1	2864-2	SL003793	0.441434	0.142356	3.10092	0.279017	0.720451	0.162417	292	0.0020372	0.245155	0.495132
Plasminogen activator inhibitor 1	PAI-1	P05121	5054	SERPINE1	2925-9	SL000006	-0.3932	0.127225	-3.09059	0.249361	-0.143839	-0.642561	292	0.00203793	0.417282	0.645974
26S proteasome non-ATPase regulatory subunit 10	PSD10	O75832	5716	PSMD10	18385-4	SL016384	0.381719	0.123299	3.09588	0.241666	0.623385	0.140053	292	0.00204672	0.485153	0.696529
Histone-binding protein RBBP4	RBBP4	Q09028	5928	RBBP4	15331-47	SL013819	-0.475706	0.153662	-3.0958	0.301177	-0.174529	-0.776882	292	0.00205018	0.128245	0.358113
Periostin	Periostin	Q15063	10631	POSTN	3457-57	SL005084	0.33124	0.10717	3.0908	0.210052	0.541292	0.121187	292	0.00208191	0.474266	0.68867
Vascular endothelial growth factor D	VEGF-D	O43915	2277	FIGF	14705-1	SL003320	0.316025	0.102224	3.09151	0.200358	0.516383	0.115667	292	0.002083	0.59371	0.770526
Protein kinase C beta type (splice variant beta-II)	PKC-B-II	P05771	5579	PRKCB	5475-10	SL000553	0.503915	0.163745	3.07745	0.320939	0.824854	0.182976	292	0.00210903	0.00472483	0.0687374
Lactadherin	MFGM	Q08431	4240	MFGE8	4455-89	SL006523	-0.391639	0.127	-3.08378	0.24892	-0.14272	-0.640559	292	0.00212145	0.37351	0.611155
Protein FAM173A	F173A	Q9BQD7	65990	FAM173A	7148-42	SL018110	0.292288	0.0949421	3.07859	0.186087	0.478374	0.106201	292	0.00218035	0.684867	0.827567
Ribonucleoside-diphosphate reductase subunit M2	RIR2	P31350	6241	RRM2	17750-8	SL007192	0.383747	0.12464	3.07885	0.244294	0.628042	0.139453	292	0.00219892	0.367392	0.606128
E3 ubiquitin-protein ligase CCNB1IP1	CIP1	Q9NPC3	57820	CCNB1IP1	9728-4	SL019116	0.312048	0.101687	3.06871	0.199307	0.511355	0.112742	292	0.00220961	0.640092	0.800057
Protein Largen	PRR16	Q569H4	51334	PRR16	10621-26	SL018592	0.427944	0.139136	3.07572	0.272707	0.700651	0.155237	292	0.00221105	0.291683	0.540077
Fibroblast growth factor 7	FGF7	P21781	2252	FGF7	4487-1	SL001691	0.478665	0.155835	3.07161	0.305437	0.784101	0.173228	292	0.0022181	0.0992505	0.31504
					11918-54		0.335555	0.109017	3.078	0.213674	0.549229	0.121882	292	0.0022219	0.547207	0.739734
Histidine triad nucleotide-binding protein 1	HINT1	P49773	3094	HINT1	5900-11	SL009431	0.450536	0.146544	3.07442	0.287226	0.737762	0.163311	292	0.00222478	0.177173	0.420919
Protein O-linked-mannose beta-1,4-N-acetylglucosaminyltransferase 2	AGO61	Q8NAT1	84892	POMGNT2	6359-50	SL017427	0.238613	0.0775791	3.07574	0.152055	0.390668	0.0865579	292	0.00224289	0.744031	0.862572
Dual specificity protein phosphatase 16	DUS16	Q9BY84		DUSP16	14631-22	SL020115	0.329356	0.107363	3.06767	0.210432	0.539788	0.118923	292	0.00224576	0.576347	0.759175
Golgi membrane protein 1	GOLM1	Q8NBJ4	51280	GOLM1	8983-7	SL010628	-0.236306	0.0771049	-3.06473	0.151126	-0.0851802	-0.387431	292	0.00226955	0.783334	0.885062
Ras-related protein Rab-5C	RAB5C	P51148	5878	RAB5C	14287-6	SL008533	0.48885	0.159422	3.0664	0.312466	0.801317	0.176384	292	0.00227136	0.0501184	0.223871
Oocyte-secreted protein 2	PLACL	Q86WS3	219990	OOSP2	7106-37	SL012654	0.424217	0.138674	3.0591	0.271801	0.696018	0.152416	292	0.00227584	0.29858	0.546425
Uncharacterized protein C5orf46	CE046	Q6UWT4	389336	C5orf46	9100-32	SL018829	0.452022	0.147797	3.05841	0.289681	0.741704	0.162341	292	0.00230857	0.101483	0.318564
D-tyrosyl-tRNA(Tyr) deacylase 1	Histidyl-tRNA synthetase-related	Q8TEA8	92675	DTD1	19194-9	SL015828	0.466562	0.152686	3.0557	0.299264	0.765826	0.167297	292	0.00234496	0.0983141	0.313551
2',3'-cyclic-nucleotide 3'-phosphodiesterase	CN37	P09543	1267	CNP	6609-22	SL008878	0.484333	0.158724	3.0514	0.3111	0.795433	0.173233	292	0.00235713	0.0675258	0.259857
Lipocalin-1	LCN1	P31025	3933	LCN1	11708-2	SL007868	0.303244	0.0994312	3.04979	0.194885	0.498129	0.108359	292	0.00236107	0.636891	0.798054
Calcium-regulated heat-stable protein 1	CHSP1	Q9Y2V2	23589	CARHSP1	12808-103	SL013301	0.427241	0.139985	3.05205	0.274371	0.701612	0.152871	292	0.00239381	0.245669	0.49565
Ubiquitin-like domain-containing CTD phosphatase 1	UBCP1	Q8WVY7	134510	UBLCP1	19124-9	SL013222	0.480383	0.157229	3.05531	0.308169	0.788552	0.172214	292	0.00239514	0.113524	0.336933
Spermatogenesis-associated protein 9	SPAT9	Q9BWV2	83890	SPATA9	7809-22	SL018265	0.350212	0.114885	3.04836	0.225175	0.575387	0.125037	292	0.00239515	0.523547	0.723565
Death domain-containing protein CRADD	CRADD	P78560	8738	CRADD	15322-35	SL007330	0.447895	0.146903	3.04892	0.28793	0.735826	0.159965	292	0.00240552	0.196521	0.443307
Dermokine	Dermokine	Q6E0U4	93099	DMKN	5963-9	SL010588	0.391213	0.128722	3.03921	0.252295	0.643508	0.138918	292	0.00242863	0.356191	0.596818
Leucine-rich repeat LGI family member 3	LGI3	Q8N145	203190	LGI3	8003-57	SL012685	0.312812	0.102919	3.03942	0.201721	0.514533	0.111092	292	0.00243561	0.610261	0.781192
Proteasome subunit alpha type-2	PSA2	P25787	5683	PSMA2	4280-47	SL008865	0.448712	0.147065	3.05111	0.288248	0.73696	0.160464	292	0.00244518	0.218209	0.467128
Toll-like receptor 1	TLR1	Q15399	7096	TLR1	11149-3	SL004490	-0.343689	0.113085	-3.03922	0.221646	-0.122043	-0.565335	292	0.00245849	0.401528	0.633662
Peptidyl-prolyl cis-trans isomerase H	PPIH	O43447	10465	PPIH	12449-16	SL012991	0.479332	0.157717	3.03918	0.309126	0.788458	0.170206	292	0.0024802	0.0879632	0.296586
Fms-related tyrosine kinase 3 ligand	Flt3 ligand	P49771	2323	FLT3LG	14093-10	SL004343	0.30788	0.101206	3.04212	0.198363	0.506244	0.109517	292	0.00248211	0.578429	0.760546
Angiopoietin-related protein 3	ANGL3	Q9Y5C1	27329	ANGPTL3	10391-1	SL006803	0.376505	0.123813	3.04093	0.242673	0.619177	0.133832	292	0.00248975	0.389036	0.623728
Platelet endothelial aggregation receptor 1	PEAR1	Q5VY43	375033	PEAR1	8275-31	SL018435	0.371885	0.122758	3.02942	0.240605	0.612491	0.13128	292	0.00249496	0.422021	0.649632
Pyrin domain-containing protein 1	PYDC1	Q8WXC3		PYDC1	12835-101	SL019914	-0.354116	0.116908	-3.02903	0.229139	-0.124977	-0.583255	292	0.00250256	0.488398	0.698855
Eukaryotic translation initiation factor 4B	IF4B	P23588	1975	EIF4B	14675-20	SL011011	0.495698	0.163425	3.03319	0.320312	0.81601	0.175386	292	0.00251802	0.0142627	0.119426
Natriuretic peptides B	BNP	P16860	4879	NPPB	16751-15	SL002689	0.272473	0.0896997	3.03762	0.175811	0.448285	0.0966621	292	0.00252825	0.686134	0.828332
					10701-30		-0.36843	0.121621	-3.02933	0.238378	-0.130053	-0.606808	292	0.00252935	0.370932	0.609041
Granulysin	Granulysin	P22749	10578	GNLY	3195-50	SL000678	0.14702	0.0483917	3.03813	0.0948478	0.241868	0.0521726	292	0.00252942	0.899173	0.948248
Hepatocyte nuclear factor 4-alpha	HNF4A	P41235	3172	HNF4A	10041-3	SL007226	-0.327128	0.107868	-3.03268	0.211421	-0.115707	-0.538549	292	0.00256914	0.514813	0.717505
C-type lectin domain family 10 member A	CLC10	Q8IUN9	10462	CLEC10A	10955-4	SL014095	0.323225	0.106542	3.03378	0.208822	0.532047	0.114402	292	0.00256978	0.493332	0.702376
Ras-related protein Rab-21	RAB21	Q9UL25	23011	RAB21	17514-48	SL008443	0.480383	0.158993	3.02142	0.311625	0.792008	0.168757	292	0.00259733	0.0502039	0.224062
Janus kinase and microtubule-interacting protein 3	JKIP3	Q5VZ66	282973	JAKMIP3	9068-17	SL018805	0.277294	0.0917065	3.02371	0.179745	0.457038	0.0975489	292	0.00261269	0.680462	0.824901
Peroxisomal NADH pyrophosphatase NUDT12	NUD12	Q9BQG2		NUDT12	13947-371	SL020301	0.395279	0.130845	3.02096	0.256457	0.651736	0.138822	292	0.00261698	0.374713	0.612138
Eukaryotic translation initiation factor 2 subunit 1	IF2A	P05198	1965	EIF2S1	19259-176	SL010915	0.482401	0.159781	3.01914	0.313171	0.795572	0.169231	292	0.00262085	0.0384582	0.196108
Fibroblast growth factor 3	FGF-3	P11487	2248	FGF3	7894-155	SL005162	-0.385166	0.127165	-3.02885	0.249244	-0.135921	-0.63441	292	0.00264104	0.447572	0.669008
C-type mannose receptor 2	MRC2	Q9UBG0	9902	MRC2	3041-55	SL008416	0.283739	0.0941679	3.01312	0.184569	0.468308	0.0991699	292	0.00264187	0.647603	0.804738
Somatostatin-28	Somatostatin-28	P61278	6750	SST	5957-30	SL011510	0.372763	0.123768	3.0118	0.242585	0.615348	0.130178	292	0.00265324	0.471977	0.687006
Complexin-2	CPLX2	Q6PUV4		CPLX2	15321-8	SL019971	0.316517	0.104635	3.02496	0.205085	0.521603	0.111432	292	0.00266854	0.485815	0.697005
Mast/stem cell growth factor receptor Kit	SCF sR	P10721	3815	KIT	2475-1	SL004010	0.292532	0.0971166	3.01217	0.190349	0.482881	0.102184	292	0.00267173	0.595591	0.771746
Ubiquitin-like-conjugating enzyme ATG3	ATG3	Q9NT62	64422	ATG3	18156-7	SL019804	0.371179	0.122778	3.02318	0.240644	0.611823	0.130535	292	0.00267869	0.450355	0.671085
Afamin	Afamin	P43652	173	AFM	4763-31	SL004742	-0.22866	0.0757753	-3.01761	0.14852	-0.0801407	-0.37718	292	0.00269564	0.752857	0.867673
Matrilin-2	MATN2	O00339	4147	MATN2	3325-2	SL010465	0.33299	0.110861	3.00368	0.217287	0.550277	0.115704	292	0.00275088	0.517579	0.719429
Tumor necrosis factor receptor superfamily member 1B	TNF sR-II	P20333	7133	TNFRSF1B	3152-57	SL001800	-0.296893	0.0991863	-2.99328	0.194405	-0.102488	-0.491298	292	0.00280072	0.634508	0.79656
High mobility group protein HMG-I/HMG-Y	HMGA1	P17096	3159	HMGA1	16536-3	SL006117	0.330374	0.110267	2.99612	0.216124	0.546498	0.11425	292	0.00280467	0.57185	0.756208
Transferrin receptor protein 1	TR	P02786	7037	TFRC	6895-1	SL000600	-0.340527	0.113666	-2.99585	0.222786	-0.117741	-0.563314	292	0.00280751	0.559459	0.74797
Lipase member N	LIPN	Q5VXI9	643418	LIPN	8097-77	SL018395	0.269349	0.089618	3.00553	0.175651	0.445001	0.0936983	292	0.00280823	0.699199	0.836181
Otoraplin	Otoraplin	Q9NRC9	56914	OTOR	15432-1	SL004684	0.211406	0.0703652	3.00441	0.137916	0.349322	0.0734902	292	0.00282407	0.792012	0.88995
Matrix metalloproteinase-16	MMP-16	P51512	4325	MMP16	5268-49	SL003331	0.379768	0.127195	2.98571	0.249303	0.629071	0.130466	292	0.00283683	0.432202	0.657421
Cullin-3	CUL3	Q13618	8452	CUL3	10045-47	SL010989	0.449741	0.150208	2.99413	0.294407	0.744148	0.155334	292	0.00285371	0.0657918	0.256499
Destrin	DEST	P60981	11034	DSTN	18883-4	SL008142	0.483071	0.162276	2.97686	0.31806	0.801131	0.165011	292	0.00287187	0	0
PILR alpha-associated neural protein	PIANP	Q8IYJ0	196500	PIANP	14114-18	SL019019	0.331107	0.11063	2.99293	0.216834	0.547941	0.114273	292	0.00287474	0.495192	0.703699
Leukocyte immunoglobulin-like receptor subfamily B member 5	LIRB5	O75023	10990	LILRB5	7015-8	SL018005	-0.125256	0.0418003	-2.99654	0.0819285	-0.0433275	-0.207185	292	0.00288144	0.935305	0.967112
Biotinidase	Biotinidase	P43251	686	BTD	15644-1	SL000303	-0.328454	0.109932	-2.98779	0.215466	-0.112987	-0.54392	292	0.00291063	0.53276	0.729904
WW domain-binding protein 2	WBP2	Q969T9	23558	WBP2	17698-15	SL016498	0.377635	0.126008	2.99692	0.246975	0.62461	0.13066	292	0.00291969	0.447045	0.668614
R-spondin-3	RSPO3	Q9BXY4	84870	RSPO3	13094-75	SL018509	0.298778	0.0997289	2.9959	0.195469	0.494247	0.10331	292	0.00295182	0.615679	0.784652
ADP-ribosylation factor-like protein 3	ARL3	P36405	403	ARL3	12571-14	SL019778	0.45812	0.153519	2.98412	0.300897	0.759017	0.157222	292	0.00297174	0.0633278	0.25165
Peptidyl-prolyl cis-trans isomerase NIMA-interacting 4	PIN4	Q9Y237	5303	PIN4	12718-43	SL010814	0.464526	0.155787	2.98179	0.305343	0.769869	0.159183	292	0.00298348	0.0879818	0.296617
Solute carrier family 35 member G2	S35G2	Q8TBE7		SLC35G2	13501-10	SL020163	-0.35833	0.12011	-2.98334	0.235416	-0.122914	-0.593746	292	0.00299153	0.384939	0.620435
Trem-like transcript 2 protein	TRML2	Q5T2D2	79865	TREML2	5736-1	SL006573	0.263543	0.0883032	2.98453	0.173074	0.436618	0.0904691	292	0.0029933	0.69572	0.834098
Interferon alpha-14	IFN14	P01570	3448	IFNA14	7180-114	SL018074	0.367218	0.12343	2.97511	0.241922	0.60914	0.125295	292	0.00301656	0.446307	0.668062
Plexin-D1	PLXD1	Q9Y4D7	23129	PLXND1	19561-216	SL009025	-0.245152	0.0824645	-2.97282	0.16163	-0.0835215	-0.406782	292	0.00303637	0.749984	0.866016
Signal transducer and activator of transcription 6	STAT6	P42226	6778	STAT6	10372-18	SL007229	0.460328	0.154936	2.97108	0.303674	0.764002	0.156653	292	0.00304659	0.0934335	0.305669
Peptidyl-prolyl cis-trans isomerase NIMA-interacting 1	PIN1	Q13526	5300	PIN1	15474-7	SL013908	0.474094	0.159415	2.97397	0.312453	0.786546	0.161641	292	0.0030612	0.0551515	0.234844
Protein pelota homolog	PELO	Q9BRX2		PELO	12431-13	SL019737	0.367909	0.123813	2.97149	0.242674	0.610582	0.125235	292	0.00310299	0.398286	0.631099
BPI fold-containing family B member 1	LPLC1	Q8TDL5	92747	BPIFB1	15367-38	SL012736	0.276362	0.0928825	2.97539	0.18205	0.458411	0.0943119	292	0.00311121	0.680867	0.825147
Tropomyosin alpha-1 chain	Tropomyosin 1 alpha chain	P09493	7168	TPM1	5033-27	SL004737	-0.300733	0.101328	-2.96791	0.198603	-0.10213	-0.499335	292	0.003122	0.543551	0.737259
					9508-104		0.416605	0.140709	2.96075	0.27579	0.692396	0.140815	292	0.00312752	0.29201	0.54038
Granzyme K	Granzyme K	P49863	3003	GZMK	9545-156	SL004563	0.302502	0.10193	2.96775	0.199782	0.502284	0.10272	292	0.00313575	0.621932	0.788627
Protein mago nashi homolog 2	MGN2	Q96A72		MAGOHB	16875-13	SL019553	0.420539	0.142207	2.95723	0.278726	0.699264	0.141813	292	0.00320424	0.263091	0.512924
Peptidyl-prolyl cis-trans isomerase FKBP4	FKBP52 protein	Q02790	2288	FKBP4	17722-5	SL002795	0.454054	0.153298	2.9619	0.300465	0.754519	0.153589	292	0.00320715	0.0815143	0.285507
BAG family molecular chaperone regulator 2	BAG-2	O95816	9532	BAG2	19228-11	SL005001	0.394047	0.133766	2.94579	0.262182	0.656229	0.131866	292	0.00328977	0.359186	0.599321
NADH dehydrogenase [ubiquinone] 1 beta subcomplex subunit 11, mitochondrial	NDUBB	Q9NX14	54539	NDUFB11	7747-47	SL018268	-0.345207	0.117298	-2.943	0.229903	-0.115303	-0.57511	292	0.00331316	0.416171	0.645113
Transmembrane protein 132C	T132C	Q8N3T6	92293	TMEM132C	7173-141	SL018134	0.337738	0.11463	2.94632	0.224675	0.562413	0.113062	292	0.00332563	0.497074	0.705035
Low-density lipoprotein receptor-related protein 12	LRP12	Q9Y561	29967	LRP12	15506-34	SL018249	0.253255	0.086045	2.94329	0.168648	0.421904	0.0846074	292	0.00335714	0.724536	0.851197
Cancer/testis antigen 55	CX048	Q8WUE5	54967	CT55	9363-11	SL017420	-0.330393	0.112401	-2.93941	0.220306	-0.110087	-0.550699	292	0.0033603	0.45288	0.672963
Methionine adenosyltransferase 2 subunit beta	MAT2B	Q9NZL9	27430	MAT2B	18392-19	SL021365	0.349041	0.118708	2.94033	0.232668	0.581708	0.116373	292	0.00336695	0.499655	0.706862
NudC domain-containing protein 3	NUDC3	Q8IVD9	23386	NUDCD3	4254-6	SL011768	0.388907	0.132448	2.9363	0.259599	0.648506	0.129309	292	0.00338453	0.350794	0.592279
Signal transducer and activator of transcription 5B	STA5B	P51692		STAT5B	16551-14	SL019098	0.366228	0.124339	2.94541	0.243704	0.609932	0.122524	292	0.003393	0.460579	0.67866
N-acetylglucosamine-6-sulfatase	GNS	P15586	2799	GNS	3616-3	SL008504	-0.353487	0.120194	-2.94098	0.235579	-0.117908	-0.589067	292	0.0033931	0.469538	0.685228
Tyrosine-protein phosphatase non-receptor type 6	PTP-1C	P29350	5777	PTPN6	4318-12	SL004940	0.401651	0.136553	2.94135	0.267644	0.669295	0.134007	292	0.00339473	0.128196	0.358044
Exosome complex component RRP43	EXOS8	Q96B26		EXOSC8	18909-11	SL019371	0.375763	0.128106	2.93321	0.251089	0.626852	0.124675	292	0.00341139	0.359727	0.599773
					10471-25		-0.335954	0.114493	-2.93427	0.224407	-0.111547	-0.56036	292	0.00342032	0.398526	0.631289
Bis(5'-adenosyl)-triphosphatase	Fragile histidine triad protein	P49789	2272	FHIT	9826-135	SL002513	0.446907	0.152528	2.93001	0.298954	0.745861	0.147953	292	0.00346224	0.144643	0.380319
Ras-related protein Rab-14	RAB14	P61106	51552	RAB14	14283-12	SL008144	0.421957	0.1441	2.92823	0.282435	0.704393	0.139522	292	0.0034727	0.218744	0.467701
Chordin-like protein 2	CRDL2	Q6WN34	25884	CHRDL2	6086-15	SL012616	-0.251146	0.0856093	-2.93363	0.167794	-0.0833519	-0.41894	292	0.00349649	0.75714	0.870138
Inactive tyrosine-protein kinase transmembrane receptor ROR1	ROR1	Q01973	4919	ROR1	2590-69	SL006114	0.348155	0.118771	2.9313	0.232792	0.580946	0.115363	292	0.00351834	0.426939	0.653406
Heat shock 70 kDa protein 1A	HSP 70	P0DMV8	3303	HSPA1A	4124-24	SL000451	-0.326833	0.111677	-2.92658	0.218888	-0.107945	-0.54572	292	0.00353061	0.456654	0.675762
SLAM family member 6	SLAF6	Q96DU3	114836	SLAMF6	5128-53	SL014228	-0.328756	0.112545	-2.92111	0.220588	-0.108168	-0.549344	292	0.00355086	0.52392	0.723823
Zinc transporter 5	ZNT5	Q8TAD4	64924	SLC30A5	9594-30	SL019023	0.442452	0.151484	2.92079	0.296908	0.73936	0.145544	292	0.00355646	0.130343	0.36103
Cyclin-dependent kinase 8:Cyclin-C complex	CDK8/cyclin C	P49336 P24863	1024 892	CDK8 CCNC	3359-11	SL010522	0.414922	0.142012	2.92173	0.278344	0.693266	0.136578	292	0.00356757	0.244273	0.49424
Cell adhesion molecule 2	Nectin-like protein 3	Q8N3J6	253559	CADM2	16907-3	SL004806	0.340717	0.116548	2.9234	0.228435	0.569152	0.112283	292	0.00358011	0.363365	0.602797
Cytoskeleton-associated protein 2	CKAP2	Q8WWK9	26586	CKAP2	5345-51	SL006675	0.374337	0.12835	2.91652	0.251567	0.625904	0.12277	292	0.00358748	0.389422	0.624037
Ankyrin repeat domain-containing protein 54	ANR54	Q6NXT1	129138	ANKRD54	18404-22	SL021351	0.336128	0.11497	2.92361	0.225341	0.561469	0.110786	292	0.00361364	0.286588	0.535339
Ras-related protein Rab-11A	RB11A	P62491	8766	RAB11A	17744-31	SL016588	0.462071	0.158314	2.91869	0.310296	0.772367	0.151775	292	0.00361732	0.0578379	0.240495
					8667-42		0.187917	0.0643102	2.92203	0.126048	0.313965	0.0618686	292	0.00365524	0.83356	0.912995
Histone deacetylase complex subunit SAP18	SAP18	O00422		SAP18	12830-4	SL019934	-0.414661	0.142144	-2.91719	0.278603	-0.136059	-0.693264	292	0.00366819	0.220584	0.469663
Serine/threonine-protein kinase WNK3	WNK3	Q9BYP7	65267	WNK3	5493-17	SL010524	0.460891	0.158099	2.91519	0.309875	0.770766	0.151016	292	0.00368174	0.0380893	0.195165
Peroxiredoxin-1	Peroxiredoxin-1	Q06830	5052	PRDX1	3855-56	SL004919	0.456214	0.156413	2.91674	0.306569	0.762783	0.149645	292	0.00369076	0.0691084	0.262885
Beta-1,4-galactosyltransferase 2	B4GT2	O60909	8704	B4GALT2	9595-11	SL019028	0.307748	0.105892	2.90623	0.207549	0.515298	0.100199	292	0.00369647	0.610812	0.781544
D-3-phosphoglycerate dehydrogenase	SERA	O43175	26227	PHGDH	15548-35	SL018791	0.323626	0.111203	2.91023	0.217958	0.541583	0.105668	292	0.00374746	0.554544	0.744677
Allograft inflammatory factor 1	AIF1	P55008	199	AIF1	2849-49	SL004768	0.431387	0.148231	2.91024	0.290533	0.721921	0.140854	292	0.00376121	0.187126	0.432581
Growth factor receptor-bound protein 2	GRB2 adapter protein	P62993	2885	GRB2	5464-52	SL003792	0.454244	0.156453	2.9034	0.306647	0.760891	0.147597	292	0.00378745	0.0509963	0.225824
Selenoprotein W	SELW	P63302	6415	SEPW1	18310-26	SL014876	0.365883	0.125865	2.90695	0.246695	0.612578	0.119188	292	0.00379541	0.233075	0.482779
SH2 domain-containing protein 1A	SH21A	O60880	4068	SH2D1A	4567-82	SL014468	-0.371982	0.128079	-2.90431	0.251035	-0.120947	-0.623017	292	0.00379812	0.41817	0.646661
Interleukin-8	IL-8	P10145	3576	CXCL8	3447-64	SL000039	-0.348278	0.120083	-2.90031	0.235363	-0.112915	-0.583641	292	0.00380935	0.403029	0.634845
Poly(A) RNA polymerase, mitochondrial	PAPD1	Q9NVV4	55149	MTPAP	9028-5	SL018770	0.365718	0.125851	2.90595	0.246669	0.612387	0.11905	292	0.00381237	0.374347	0.611839
Adenosine kinase	ADK	P55263	132	ADK	19207-119	SL006494	0.422874	0.14575	2.90137	0.28567	0.708543	0.137204	292	0.00387399	0.229053	0.478595
Adenylosuccinate lyase	PUR8	P30566	158	ADSL	5023-23	SL009792	0.473078	0.163239	2.89808	0.319948	0.793026	0.15313	292	0.00395858	0.0291503	0.170735
Leukocyte-associated immunoglobulin-like receptor 2	LAIR2	Q6ISS4	3904	LAIR2	7130-4	SL008478	0.344232	0.119249	2.88666	0.233729	0.57796	0.110503	292	0.00396304	0.499856	0.707005
Cysteine and glycine-rich protein 2	CSRP2	Q16527	1466	CSRP2	12968-2	SL008213	0.41726	0.14429	2.89181	0.282809	0.70007	0.134451	292	0.0039838	0.21246	0.460934
Probable RNA-binding protein 23	RBM23	Q86U06		RBM23	11590-5	SL019537	-0.43899	0.152008	-2.88794	0.297936	-0.141054	-0.736926	292	0.00398939	0.13853	0.372196
HCE004359	HCE004359	HCE004359	HCE004359	HCE004359	2273-34	HCE004359	-0.484895	0.168422	-2.87905	0.330107	-0.154788	-0.815003	292	0.00400268	0.00335955	0.0579616
Esterase OVCA2	OVCA2	Q8WZ82	124641	OVCA2	17697-2	SL021016	0.445141	0.154117	2.88834	0.302069	0.74721	0.143073	292	0.0040135	0.112872	0.335965
Pleckstrin	PLEK	P08567	5341	PLEK	7875-86	SL011175	0.414849	0.143943	2.88204	0.282128	0.696976	0.132721	292	0.00401754	0.155793	0.394706
MAP/microtubule affinity-regulating kinase 3	MARK3	P27448	4140	MARK3	9747-48	SL014750	0.43989	0.152495	2.88461	0.29889	0.73878	0.140999	292	0.00401762	0.13747	0.370769
Protein kinase B gamma	PKB gamma	Q9Y243	10000	AKT3	3392-68	SL003767	0.460815	0.159643	2.88654	0.312899	0.773714	0.147915	292	0.00402206	0.0210008	0.144917
Coiled-coil domain-containing protein 51	CCD51	Q96ER9		CCDC51	12790-10	SL019874	-0.286167	0.0992776	-2.8825	0.194584	-0.0915833	-0.480752	292	0.00405738	0.663561	0.814593
B-cell lymphoma/leukemia 10	Bcl-10	O95999	8915	BCL10	8768-4	SL005248	0.39486	0.137187	2.87826	0.268887	0.663748	0.125973	292	0.00405861	0.27601	0.525367
Beta-1,3-N-acetylglucosaminyltransferase manic fringe	MFNG	O00587	4242	MFNG	5605-77	SL006973	0.273131	0.094653	2.88561	0.18552	0.458651	0.0876114	292	0.00408161	0.675943	0.822157
Aminopeptidase N	Aminopeptidase N	P15144	290	ANPEP	15457-14	SL005238	0.293522	0.101675	2.88687	0.199282	0.492804	0.094239	292	0.00409127	0.523821	0.723755
Prolow-density lipoprotein receptor-related protein 1	LRP1	Q07954	4035	LRP1	10699-52	SL018603	0.358612	0.124789	2.87374	0.244587	0.603199	0.114025	292	0.00409613	0.46932	0.685069
Carboxypeptidase Z	CBPZ	Q66K79	8532	CPZ	6493-9	SL017462	-0.240806	0.0835932	-2.88069	0.163843	-0.0769632	-0.404648	292	0.0041232	0.722618	0.85007
Interferon regulatory factor 9	ISGF3	Q00978	10379	IRF9	12439-67	SL004395	-0.288571	0.100311	-2.87675	0.19661	-0.0919609	-0.485181	292	0.00414643	0.620974	0.788019
Importin subunit beta-1	IMB1	Q14974	3837	KPNB1	3887-90	SL010927	0.456368	0.158817	2.87355	0.311281	0.767649	0.145087	292	0.00414668	0.0454387	0.213164
1-phosphatidylinositol 4,5-bisphosphate phosphodiesterase beta-1	Phospholipase C-beta-1	Q9NQ66	23236	PLCB1	11354-21	SL006829	0.446645	0.155419	2.87381	0.304622	0.751267	0.142023	292	0.0041491	0.0825825	0.287372
Junctional adhesion molecule B	JAM-B	P57087	58494	JAM2	2997-8	SL005193	0.421154	0.146374	2.87726	0.286892	0.708047	0.134262	292	0.00415349	0.226226	0.475632
Leukocyte immunoglobulin-like receptor subfamily B member 2	ILT-4	Q8N423	10288	LILRB2	5091-28	SL005191	-0.196814	0.0684488	-2.87535	0.13416	-0.0626548	-0.330974	292	0.00416094	0.834617	0.913574
Inositol monophosphatase 3	IMPA3	Q9NX62	54928	IMPAD1	9231-23	SL017105	0.338258	0.117784	2.87185	0.230856	0.569114	0.107402	292	0.00418294	0.427205	0.65361
Macrophage scavenger receptor types I and II	Macrophage scavenger receptor	P21757	4481	MSR1	11207-3	SL004580	0.313655	0.109151	2.87359	0.213936	0.527591	0.0997192	292	0.00418728	0.574765	0.758133
Activator of 90 kDa heat shock protein ATPase homolog 1	AHSA1	O95433	10598	AHSA1	11633-89	SL013002	0.453671	0.157861	2.87386	0.309408	0.763079	0.144263	292	0.0041879	0.0731117	0.270392
Peptidyl-prolyl cis-trans isomerase E	PPIE	Q9UNP9	10450	PPIE	5238-26	SL013928	0.438165	0.152681	2.86982	0.299254	0.737419	0.138911	292	0.00419327	0.131659	0.362848
C-Myc-binding protein	MYCBP	Q99417	26292	MYCBP	19250-50	SL009443	0.441978	0.154048	2.86909	0.301934	0.743912	0.140044	292	0.00420682	0.0980705	0.313162
Nuclear distribution protein nudE homolog 1	NDE1	Q9NXR1	54820	NDE1	9765-4	SL019150	0.400756	0.139796	2.86673	0.273999	0.674755	0.126757	292	0.00422236	0.280076	0.529222
Caspase recruitment domain-containing protein 18	ICBR	P57730	59082	CARD18	18190-15	SL007302	0.344488	0.11979	2.87576	0.234789	0.579278	0.109699	292	0.00422683	0.481237	0.693712
Transmembrane protein 59-like	TM59L	Q9UK28	25789	TMEM59L	9959-60	SL019199	0.396123	0.137919	2.87213	0.270322	0.666445	0.125801	292	0.00425027	0.222763	0.471978
Trimeric intracellular cation channel type B	TM38B	Q9NVV0	55151	TMEM38B	9509-4	SL019038	0.348753	0.121667	2.86646	0.238467	0.58722	0.110286	292	0.00427945	0.455892	0.675198
IST1 homolog	K0174	P53990	9798	IST1	12434-25	SL008617	0.43107	0.150548	2.86334	0.295073	0.726143	0.135996	292	0.00431197	0.135497	0.368099
Tyrosine-protein kinase transmembrane receptor ROR2	ROR2	Q01974	4920	ROR2	7861-9	SL008955	0.31336	0.109302	2.86692	0.214232	0.527593	0.0991281	292	0.00434676	0.496824	0.704858
Prostaglandin F2 receptor negative regulator	FPRP	Q9P2B2		PTGFRN	12727-7	SL019877	0.323487	0.113146	2.85903	0.221766	0.545253	0.101721	292	0.00437901	0.526258	0.725436
Electroneutral sodium bicarbonate exchanger 1	S4A8	Q2Y0W8		SLC4A8	12798-46	SL019875	-0.352639	0.123364	-2.85851	0.241794	-0.110845	-0.594433	292	0.00444307	0.337627	0.581057
Phospholipid transfer protein	PLTP	P55058	5360	PLTP	15475-4	SL004948	-0.261872	0.091872	-2.8504	0.180069	-0.0818028	-0.441941	292	0.00445067	0.710217	0.842744
ADP-ribosylation factor-like protein 2	ARL2	P36404	402	ARL2	12587-65	SL019779	0.358219	0.125527	2.85371	0.246033	0.604252	0.112185	292	0.00445775	0.443935	0.666285
Interferon regulatory factor 3	IRF-3	Q14653	3661	IRF3	17151-84	SL004509	0.445516	0.156196	2.85228	0.306145	0.751661	0.139371	292	0.00447568	0.0883313	0.297206
Insulin-like growth factor 1 receptor	IGF-I sR	P08069	3480	IGF1R	4232-19	SL003304	0.35634	0.124891	2.8532	0.244787	0.601127	0.111553	292	0.00448823	0.39877	0.631482
Platelet glycoprotein Ib alpha chain	GP1BA	P07359	2811	GP1BA	4990-87	SL006460	0.325764	0.1142	2.85259	0.223831	0.549595	0.101933	292	0.00450216	0.513198	0.716379
Malate dehydrogenase, mitochondrial	Malate dehydrogenase 2	P40926	4191	MDH2	15534-26	SL004917	0.45099	0.158521	2.84498	0.310702	0.761692	0.140288	292	0.00453335	0.0644418	0.253854
Relaxin receptor 1	RXFP1	Q9HBX9		RXFP1	14135-3	SL020172	-0.354288	0.124323	-2.84974	0.243673	-0.110615	-0.597961	292	0.00454187	0.354606	0.595488
Zinc-alpha-2-glycoprotein	AZGP1	P25311	563	AZGP1	9312-8	SL005396	0.267605	0.0941456	2.84246	0.184525	0.45213	0.0830795	292	0.00458788	0.660667	0.812814
Engulfment and cell motility protein 1	ELMO1	Q92556		ELMO1	12764-3	SL019856	0.341737	0.120004	2.84771	0.235208	0.576945	0.106529	292	0.00462524	0.491598	0.70114
60S ribosome subunit biogenesis protein NIP7 homolog	NIP7	Q9Y221		NIP7	12564-9	SL019777	0.37646	0.132554	2.84004	0.259807	0.636267	0.116654	292	0.00463681	0.319135	0.56492
Cyclin-dependent kinase 2-interacting protein	CINP	Q9BW66	51550	CINP	19383-131	SL021086	0.33677	0.118599	2.83958	0.232453	0.569224	0.104317	292	0.00463892	0.449548	0.670483
Hemoglobin subunit theta-1	HBAT	P09105	3049	HBQ1	18198-51	SL018342	0.343427	0.121315	2.83087	0.237777	0.581204	0.10565	292	0.00470855	0.462109	0.679786
Glutaredoxin-3	GLRX3	O76003	10539	GLRX3	16596-25	SL012999	0.451718	0.159338	2.83496	0.312303	0.764022	0.139415	292	0.0047123	0.0640803	0.253141
Phosphatidylinositol transfer protein alpha isoform	PIPNA	Q00169	5306	PITPNA	9934-29	SL005697	0.384754	0.135532	2.83885	0.265642	0.650396	0.119112	292	0.00471647	0.205271	0.453068
Calsyntenin-3	Alcadein-beta	Q9BQT9	9746	CLSTN3	6291-55	SL011368	-0.360544	0.127256	-2.83322	0.249422	-0.111122	-0.609965	292	0.00473413	0.38444	0.620032
Cadherin-related family member 3	CDHR3	Q6ZTQ4	222256	CDHR3	8222-49	SL018447	0.351705	0.124288	2.82977	0.243604	0.595309	0.108102	292	0.00474388	0.413696	0.643192
FACT complex subunit SSRP1	SSRP1	Q08945	6749	SSRP1	5032-64	SL009868	-0.338082	0.119404	-2.8314	0.234032	-0.104049	-0.572114	292	0.00477661	0.51099	0.714836
Kin of IRRE-like protein 2	KIRR2	Q6UWL6	84063	KIRREL2	16609-106	SL012592	0.29003	0.102039	2.84235	0.199996	0.490025	0.0900339	292	0.00478425	0.634497	0.796553
Complement C1q tumor necrosis factor-related protein 1	C1QT1	Q9BXJ1	114897	C1QTNF1	6304-8	SL012815	-0.305115	0.108004	-2.82502	0.211688	-0.0934263	-0.516803	292	0.00480173	0.518938	0.720374
Serine/threonine-protein kinase N1	PKN1	Q16512	5585	PKN1	12562-1	SL014979	0.418162	0.148082	2.82386	0.290241	0.708403	0.127922	292	0.00484052	0.168079	0.409975
Collagen alpha-1(XV) chain	COFA1	P39059	1306	COL15A1	8974-172	SL007218	0.315741	0.111535	2.83088	0.218608	0.534349	0.0971334	292	0.00484262	0.526893	0.725874
Ficolin-1	FCN1	O00602	2219	FCN1	15582-25	SL010462	0.289366	0.102309	2.82836	0.200525	0.489891	0.0888411	292	0.00485027	0.629851	0.793632
Tyrosine-protein phosphatase non-receptor type 4	PTN4	P29074		PTPN4	14254-27	SL019925	-0.32917	0.116358	-2.82895	0.228061	-0.101109	-0.557231	292	0.00491484	0.442695	0.665354
Inactive ribonuclease-like protein 10	RNS10	Q5GAN6	338879	RNASE10	5602-62	SL012546	-0.370609	0.131107	-2.82676	0.25697	-0.113639	-0.62758	292	0.00492887	0.368358	0.606925
Dynamin-2	DYN2	P50570	1785	DNM2	11572-4	SL010968	0.438368	0.15558	2.81763	0.304938	0.743306	0.133431	292	0.00494536	0.072955	0.270102
cGMP-specific 3',5'-cyclic phosphodiesterase	PDE5A	O76074	8654	PDE5A	16805-5	SL011405	0.444024	0.157786	2.81408	0.309262	0.753286	0.134763	292	0.0049921	0.0624649	0.24993
Tapasin	TPSN	O15533	6892	TAPBP	12378-71	SL012578	0.395043	0.140553	2.81063	0.275484	0.670527	0.119559	292	0.00502124	0.253502	0.50349
Protein NDRG1	NDRG1	Q92597	10397	NDRG1	19215-7	SL007570	0.256251	0.0908764	2.81978	0.178118	0.434369	0.0781334	292	0.00503714	0.67464	0.821365
Cytosol aminopeptidase	LAP	P28838	51056	LAP3	15610-72	SL000499	0.43154	0.153348	2.81412	0.300563	0.732103	0.130977	292	0.00506189	0.079051	0.28116
Delta and Notch-like epidermal growth factor-related receptor	DNER	Q8NFT8	92737	DNER	9769-48	SL008968	0.343971	0.122636	2.80483	0.240366	0.584337	0.103606	292	0.00508922	0.387279	0.622317
Dual specificity protein phosphatase 6	DUS6	Q16828	1848	DUSP6	12341-8	SL007465	0.411619	0.146499	2.8097	0.287138	0.698757	0.124481	292	0.00511253	0.18035	0.424677
Cytoplasmic protein NCK2	NCK2	O43639	8440	NCK2	13615-60	SL007010	0.443181	0.157776	2.80892	0.309242	0.752423	0.13394	292	0.00511522	0.0497775	0.223109
Actin-related protein 2/3 complex subunit 3	p21-ARC	O15145	10094	ARPC3	13573-5	SL004616	0.397441	0.141603	2.80673	0.277541	0.674982	0.119899	292	0.00512485	0.173598	0.416651
Mothers against decapentaplegic homolog 4	SMAD4	Q13485	4089	SMAD4	12022-12	SL000132	0.417286	0.148761	2.80507	0.291572	0.708858	0.125714	292	0.00514832	0.150746	0.388261
Arf-GAP domain and FG repeat-containing protein 1	NUPL	P52594	3267	AGFG1	11681-8	SL007271	0.43279	0.154345	2.80404	0.302517	0.735307	0.130274	292	0.00515461	0.0968129	0.311148
Lactosylceramide 4-alpha-galactosyltransferase	a1,4-Galactosyltransferase	Q9NPC4	53947	A4GALT	8759-29	SL002622	0.294142	0.104903	2.80394	0.20561	0.499752	0.0885318	292	0.0051658	0.565014	0.751674
Glypican-5	GPC5	P78333	2262	GPC5	4991-12	SL012469	0.2609	0.0929737	2.80617	0.182228	0.443128	0.0786712	292	0.005179	0.71162	0.843576
Ras-related protein R-Ras	RRAS	P10301	6237	RRAS	17742-2	SL008021	0.383208	0.136971	2.79773	0.268463	0.651671	0.114744	292	0.00525707	0.314049	0.560401
Complement receptor type 2	Complement receptor type 2	P20023	1380	CR2	15570-99	SL004551	-0.148463	0.0530303	-2.7996	0.103939	-0.044524	-0.252403	292	0.00525741	0.831999	0.91214
Rieske domain-containing protein	RFESD	Q8TAC1		RFESD	13603-7	SL020186	0.350652	0.125116	2.80261	0.245228	0.59588	0.105424	292	0.0052695	0.146102	0.382233
Semaphorin-6B	SEM6B	Q9H3T3	10501	SEMA6B	5121-3	SL014248	-0.33676	0.120487	-2.795	0.236154	-0.100606	-0.572915	292	0.00527061	0.50273	0.709034
Complement C2	C2	P06681	717	C2	3186-2	SL002525	-0.372712	0.133419	-2.79353	0.261502	-0.111209	-0.634214	292	0.00527112	0.315263	0.561482
Vacuolar protein sorting-associated protein VTA1 homolog	DRG-1	Q9NP79	51534	VTA1	4209-60	SL004757	0.441108	0.157655	2.79793	0.309004	0.750111	0.132104	292	0.00527245	0.0679014	0.260579
Testican-2	Testican-2	Q92563	9806	SPOCK2	5491-12	SL010471	0.347959	0.124332	2.79863	0.24369	0.591649	0.104268	292	0.00529166	0.429065	0.65503
cAMP-regulated phosphoprotein 21	cAMP-regulated phosphoprotein 21	Q9UBL0	10777	ARPP21	12860-7	SL006617	-0.31761	0.113764	-2.79182	0.222978	-0.094632	-0.540588	292	0.00532267	0.470739	0.686104
Low molecular weight phosphotyrosine protein phosphatase	PPAC	P24666	52	ACP1	3858-5	SL008063	0.267006	0.0954932	2.79608	0.187167	0.454173	0.0798396	292	0.00533693	0.698747	0.835911
Steroid receptor RNA activator 1	SRA1	Q9HD15	10011	SRA1	18220-141	SL013277	0.41299	0.147841	2.79347	0.289769	0.702759	0.123222	292	0.00538343	0.138548	0.37222
Peptidyl-prolyl cis-trans isomerase FKBP14	FKB14	Q9NWM8	55033	FKBP14	9340-17	SL017408	0.407271	0.146154	2.78659	0.286461	0.693732	0.120809	292	0.00541437	0.194492	0.441012
Hemojuvelin	RGM-C	Q6ZVN8	148738	HFE2	3332-57	SL010469	-0.295182	0.105818	-2.78953	0.207404	-0.0877788	-0.502586	292	0.00545789	0.602542	0.776236
Mannosyl-oligosaccharide 1,2-alpha-mannosidase IC	MA1C1	Q9NR34	57134	MAN1C1	13427-66	SL008941	-0.244592	0.0875156	-2.79484	0.171531	-0.0730614	-0.416123	292	0.00546643	0.743287	0.862141
Ficolin-3	Ficolin-3	O75636	8547	FCN3	5462-62	SL002086	-0.313132	0.112047	-2.79466	0.219611	-0.0935203	-0.532743	292	0.00546774	0.496571	0.704678
Hematological and neurological expressed 1 protein	HN1	Q9UK76	51155	HN1	19335-2	SL005988	-0.329426	0.118356	-2.78335	0.231978	-0.0974481	-0.561404	292	0.00549232	0.450396	0.671116
Gastrin-releasing peptide	Gastrin-releasing peptide	P07492	2922	GRP	5897-58	SL002071	0.31954	0.114951	2.7798	0.225303	0.544843	0.0942366	292	0.00553379	0.547391	0.739859
Diphosphoinositol polyphosphate phosphohydrolase 1	NUDT3	O95989		NUDT3	12796-44	SL019860	0.425035	0.152778	2.78203	0.299446	0.72448	0.125589	292	0.00554685	0.0730097	0.270203
F-actin-capping protein subunit alpha-1	CAZA1	P52907	829	CAPZA1	11449-22	SL008129	0.446281	0.160511	2.78038	0.314601	0.760882	0.131679	292	0.00555162	0.0188335	0.137235
Retinoschisin	XLRS1	O15537	6247	RS1	6497-10	SL012365	-0.313013	0.112488	-2.78264	0.220476	-0.0925367	-0.533489	292	0.00555737	0.463411	0.680743
Band 4.1-like protein 1	E41L1	Q9H4G0		EPB41L1	13993-20	SL020300	0.382253	0.137529	2.77943	0.269557	0.65181	0.112696	292	0.00560125	0.0691594	0.262982
Dihydropyrimidinase-related protein 2	DPYL2	Q16555	1808	DPYSL2	13567-1	SL008214	0.29948	0.107686	2.78103	0.211065	0.510545	0.0884141	292	0.00561851	0.553513	0.743985
Alpha-1-microglobulin	a1-Microglobulin	P02760	259	AMBP	15453-3	SL003022	-0.271733	0.0978598	-2.77676	0.191805	-0.0799282	-0.463539	292	0.00570795	0.582863	0.763454
Gremlin-2	GREM2	Q9H772	64388	GREM2	5598-3	SL007665	0.334165	0.120231	2.77936	0.235653	0.569818	0.0985123	292	0.00570932	0.339137	0.582355
Endoplasmic reticulum resident protein 27	ERP27	Q96DN0	121506	ERP27	9333-59	SL017394	0.261315	0.09423	2.77316	0.184691	0.446006	0.0766241	292	0.00572333	0.691642	0.83165
Galectin-1	Galectin-1	P09382	3956	LGALS1	8046-9	SL001912	0.33565	0.120896	2.77636	0.236956	0.572606	0.0986943	292	0.00573841	0.497982	0.705678
Transketolase	Transketolase	P29401	7086	TKT	4306-4	SL003655	0.420511	0.152096	2.76478	0.298107	0.718618	0.122404	292	0.00580153	0.140072	0.374262
Peregrin	BRPF1	P55201		BRPF1	11671-19	SL019544	-0.379272	0.137245	-2.76346	0.269	-0.110271	-0.648272	292	0.00580348	0.285652	0.534465
Syntaxin-binding protein 6	STXB6	Q8NFX7	29091	STXBP6	18308-30	SL020946	0.364804	0.132186	2.75977	0.259085	0.623889	0.105719	292	0.00584357	0.341568	0.584439
Aflatoxin B1 aldehyde reductase member 2	Aflatoxin B1 aldehyde reductase	O43488	8574	AKR7A2	4188-1	SL003658	0.429571	0.155502	2.76247	0.304784	0.734355	0.124786	292	0.00586333	0.0811564	0.28488
Protein FAM163B	F163B	P0C2L3	642968	FAM163B	10880-38	SL018034	0.397609	0.144048	2.76025	0.282335	0.679944	0.115274	292	0.00588472	0.198231	0.445231
Arginase-2, mitochondrial	Arginase	P78540	384	ARG2	17752-24	SL002641	0.31094	0.112697	2.75909	0.220885	0.531825	0.0900544	292	0.00590495	0.55671	0.74613
Alpha-1,6-mannosyl-glycoprotein 2-beta-N-acetylglucosaminyltransferase	MGAT2	Q10469	4247	MGAT2	6909-40	SL014911	-0.24905	0.0901768	-2.76179	0.176747	-0.0723032	-0.425796	292	0.00595971	0.597269	0.772832
R-spondin-3	RSPO3	Q9BXY4	84870	RSPO3	8427-118	SL018509	0.28549	0.103346	2.76247	0.202558	0.488048	0.0829316	292	0.00597656	0.588566	0.767181
Stathmin	Stathmin	P16949	3925	STMN1	17367-5	SL004916	0.416596	0.150844	2.76177	0.295654	0.71225	0.120942	292	0.00599081	0.159197	0.398995
DnaJ homolog subfamily A member 4	DNJA4	Q8WW22	55466	DNAJA4	9744-139	SL019145	0.424211	0.153914	2.75616	0.301671	0.725882	0.12254	292	0.00601429	0.0289762	0.170224
ADAMTS-like protein 1	ATL1	Q8N6G6	92949	ADAMTSL1	16890-37	SL012697	0.311482	0.112982	2.75692	0.221445	0.532927	0.0900374	292	0.00601816	0.400258	0.632659
Junctophilin-1	JPH1	Q9HDC5	56704	JPH1	6940-18	SL016525	-0.296436	0.107228	-2.76455	0.210166	-0.0862699	-0.506602	292	0.00602637	0.600369	0.774835
Pseudokinase FAM20A	FA20A	Q96MK3	54757	FAM20A	6433-57	SL012782	-0.347566	0.126379	-2.75019	0.247703	-0.0998634	-0.595269	292	0.00603545	0.413215	0.642818
Ceroid-lipofuscinosis neuronal protein 5	CLN5	O75503	1203	CLN5	8874-53	SL008637	-0.323642	0.117393	-2.75692	0.230089	-0.0935525	-0.553731	292	0.00603748	0.501979	0.708505
Regulation of nuclear pre-mRNA domain-containing protein 1B	C20orf77	Q9NQG5	58490	RPRD1B	19126-4	SL005717	-0.357315	0.129862	-2.75149	0.25453	-0.102785	-0.611845	292	0.00605833	0.397198	0.630236
Ephrin-B1	EFNB1	P98172	1947	EFNB1	13104-32	SL008614	0.368899	0.134303	2.74677	0.263233	0.632132	0.105666	292	0.00615048	0.315602	0.561785
EH domain-binding protein 1	EHBP1	Q8NDI1	23301	EHBP1	12813-18	SL006654	0.333428	0.121596	2.74209	0.238329	0.571756	0.0950987	292	0.00617156	0.492492	0.701778
Roundabout homolog 3	ROBO3	Q96MS0	64221	ROBO3	5117-14	SL014148	-0.355667	0.129224	-2.75232	0.25328	-0.102387	-0.608946	292	0.0061883	0.419669	0.647819
Interleukin-18	IL-18	Q14116	3606	IL18	5661-15	SL001715	0.400559	0.145414	2.75462	0.28501	0.685569	0.115548	292	0.00619451	0.235953	0.48575
Contactin-4	Contactin-4	Q8IWV2	152330	CNTN4	3298-52	SL010454	0.228747	0.0833641	2.74396	0.163394	0.392141	0.0653537	292	0.00619532	0.736139	0.857985
Alpha-L-iduronidase	IDUA	P35475	3425	IDUA	3169-70	SL010368	-0.258148	0.0941118	-2.743	0.184459	-0.0736891	-0.442607	292	0.00624755	0.644243	0.802648
Mitogen-activated protein kinase 1	MK01	P28482	5594	MAPK1	3115-64	SL006918	0.437322	0.159553	2.74093	0.312723	0.750045	0.124599	292	0.00624925	0.0469617	0.216706
DnaJ homolog subfamily C member 17	DJC17	Q9NVM6		DNAJC17	14655-1	SL020140	0.398667	0.145416	2.74156	0.285016	0.683683	0.113651	292	0.00629711	0.205832	0.453687
Eukaryotic translation initiation factor 5A-2	IF5A2	Q9GZV4	56648	EIF5A2	11355-10	SL008435	0.429539	0.156823	2.739	0.307374	0.736913	0.122165	292	0.00629854	0.0959727	0.309795
Alcohol dehydrogenase class-3	ADHX	P11766	128	ADH5	11369-23	SL008855	0.417127	0.152514	2.73502	0.298927	0.716054	0.118201	292	0.00633879	0.120228	0.346739
NGFI-A-binding protein 1	NAB1	Q13506		NAB1	13933-276	SL020257	-0.388722	0.141777	-2.74179	0.277883	-0.110839	-0.666605	292	0.00637054	0.170057	0.41238
Ephrin type-A receptor 10	EPHAA	Q5JZY3	284656	EPHA10	5076-53	SL014294	0.329653	0.120836	2.7281	0.236839	0.566492	0.0928139	292	0.00642837	0.487586	0.698273
Hepatocyte growth factor-regulated tyrosine kinase substrate	HGS	O14964	9146	HGS	13644-30	SL016371	0.441956	0.162559	2.71873	0.318616	0.760572	0.123339	292	0.00644093	0	0
26S proteasome non-ATPase regulatory subunit 5	PSMD5	Q16401	5711	PSMD5	10716-35	SL010942	0.289545	0.106018	2.73111	0.207794	0.49734	0.0817509	292	0.00644559	0.557244	0.746488
Vasoactive Intestinal Peptide	Vasoactive Intestinal Peptide	P01282	7432	VIP	3522-57	SL000615	0.406742	0.14914	2.72725	0.292314	0.699056	0.114427	292	0.00644993	0.182949	0.427725
Glycogen synthase kinase-3 alpha	GSK-3 alpha	P49840	2931	GSK3A	3441-64	SL003723	0.411725	0.15083	2.72973	0.295626	0.707351	0.116098	292	0.0064714	0.108149	0.32886
Fibroblast growth factor 9	FGF9	P31371	2254	FGF9	19584-33	SL003849	0.307762	0.112855	2.72706	0.221195	0.528958	0.0865668	292	0.006472	0.519886	0.721031
Carbonic anhydrase 13	Carbonic anhydrase XIII	Q8N1Q1	377677	CA13	3420-21	SL004869	0.392106	0.143752	2.72766	0.281754	0.673859	0.110352	292	0.00649881	0.119139	0.345166
Peptidyl-prolyl cis-trans isomerase FKBP2	FKBP2	P26885	2286	FKBP2	9339-204	SL008070	0.418484	0.153631	2.72395	0.301118	0.719602	0.117367	292	0.00654017	0.102958	0.320871
Dihydrolipoyl dehydrogenase, mitochondrial	DLDH	P09622	1738	DLD	15527-90	SL008018	0.321318	0.118375	2.71441	0.232014	0.553332	0.0893034	292	0.00658862	0.483001	0.694983
Calpain I	Calpain I	P07384 P04632	823 826	CAPN1 CAPNS1	2668-70	SL000337	0.414313	0.15223	2.72163	0.29837	0.712682	0.115943	292	0.00659094	0.115581	0.339972
Ubiquilin-2	UBQL2	Q9UHD9	29978	UBQLN2	19121-3	SL009019	0.418223	0.153653	2.72186	0.30116	0.719383	0.117062	292	0.00662421	0.0972215	0.311804
Macrophage receptor MARCO	MARCO	Q9UEW3	8685	MARCO	9003-99	SL018780	-0.33286	0.122462	-2.71808	0.240025	-0.0928353	-0.572885	292	0.00664028	0.4134	0.642962
Interleukin-11 receptor subunit alpha	IL-11 RA	Q14626	3590	IL11RA	18216-22	SL007423	0.291644	0.107173	2.72123	0.21006	0.501704	0.081584	292	0.00666529	0.549324	0.741164
Protein FAM234B	K1467	A2RU67	57613	KIAA1467	7892-132	SL018293	-0.236443	0.0869704	-2.71866	0.170462	-0.0659812	-0.406905	292	0.00668413	0.68653	0.828571
Caspase-3	Caspase-3	P42574	836	CASP3	3593-72	SL003711	0.422304	0.155536	2.71516	0.30485	0.727153	0.117454	292	0.00673906	0.034723	0.186341
Phosphopantothenate--cysteine ligase	PPCS	Q9HAB8	79717	PPCS	17843-30	SL016522	0.430792	0.158592	2.71636	0.31084	0.741632	0.119952	292	0.00677272	0.0540045	0.232389
Galectin-related protein	LEGL	Q3ZCW2	29094	HSPC159	18236-3	SL016463	0.408005	0.150451	2.71189	0.294883	0.702888	0.113122	292	0.00684784	0.0606091	0.246189
Polyphosphoinositide phosphatase	FIG4	Q92562	9896	FIG4	6948-82	SL017959	0.209702	0.077445	2.70775	0.151792	0.361494	0.0579095	292	0.00686916	0.774224	0.8799
Prothrombin	Prothrombin	P00734	2147	F2	5316-54	SL000558	0.418299	0.15466	2.70463	0.303134	0.721432	0.115165	292	0.00687489	0.128615	0.35863
Insulin-like growth factor-binding protein 4	IGFBP-4	P22692	3487	IGFBP4	2950-57	SL005171	-0.337048	0.124527	-2.70662	0.244074	-0.0929743	-0.581122	292	0.00687765	0.300572	0.548245
14-3-3 protein eta	14-3-3 eta	Q04917	7533	YWHAH	4707-50	SL005796	0.417112	0.153981	2.70884	0.301804	0.718916	0.115308	292	0.00689201	0.0558732	0.236375
Oxysterol-binding protein-related protein 9	OSBL9	Q96SU4		OSBPL9	16899-59	SL019034	0.296874	0.10939	2.71389	0.214405	0.511279	0.0824687	292	0.0069073	0.571848	0.756206
Peptidyl-prolyl cis-trans isomerase D	PPID	Q08752	5481	PPID	5202-4	SL007373	0.400078	0.148014	2.70297	0.290108	0.690185	0.10997	292	0.00691132	0.124506	0.352854
Haptoglobin isoform 2	HPT	P00738	3240	HP	7905-30	SL018283	-0.212853	0.0784143	-2.71447	0.153692	-0.0591613	-0.366545	292	0.00693346	0.762614	0.873278
L-lactate dehydrogenase B chain	LDH-H 1	P07195	3945	LDHB	3890-8	SL000493	0.422886	0.156483	2.70245	0.306706	0.729592	0.11618	292	0.00695942	0.0842228	0.290212
Ubiquitin-fold modifier-conjugating enzyme 1	UFC1	Q9Y3C8	51506	UFC1	3405-6	SL010529	0.408744	0.151041	2.70619	0.29604	0.704784	0.112704	292	0.00696257	0.0857013	0.292748
Multimerin-2	EMILIN-3	Q9H8L6	79812	MMRN2	9723-105	SL005610	0.366821	0.135767	2.70183	0.266104	0.632925	0.100716	292	0.00700236	0.311661	0.558266
Casein kinase II 2-alpha:2-beta heterotetramer	CK2-A1:B	P68400 P67870	1457 1460	CSNK2A1 CSNK2B	5225-50	SL016550	0.437145	0.161704	2.70336	0.31694	0.754086	0.120205	292	0.00700464	0.032213	0.17948
Thrombopoietin	Tpo	P40225	7066	THPO	8059-1	SL000598	0.255845	0.0947082	2.7014	0.185628	0.441473	0.0702165	292	0.00701177	0.690794	0.83114
NACHT, LRR and PYD domains-containing protein 4	NALP4	Q96MN2		NLRP4	12794-6	SL019902	-0.332596	0.123227	-2.69906	0.241524	-0.0910714	-0.57412	292	0.00707616	0.407472	0.638336
Tribbles homolog 2	TRIB2	Q92519	28951	TRIB2	12363-70	SL015111	0.341752	0.126818	2.69482	0.248563	0.590315	0.0931888	292	0.00707747	0.389383	0.624006
Mitochondrial fission 1 protein	FIS1	Q9Y3D6	51024	FIS1	17746-77	SL010882	0.397488	0.147456	2.69563	0.289014	0.686502	0.108474	292	0.00710589	0.195354	0.441989
Sorcin	Sorcin	P30626	6717	SRI	12356-65	SL005002	0.420636	0.15579	2.70003	0.305347	0.725984	0.115289	292	0.00711556	0.0967351	0.311023
GDNF family receptor alpha-1	GFRa-1	P56159	2674	GFRA1	3314-74	SL004858	-0.292217	0.108234	-2.69986	0.212139	-0.0800783	-0.504356	292	0.00712169	0.590725	0.768586
Complement C1q tumor necrosis factor-related protein 3	C1QT3	Q9BXJ4	114899	C1QTNF3	7251-64	SL012818	0.218306	0.081117	2.69125	0.158989	0.377295	0.0593166	292	0.00712793	0.714978	0.845564
Dual specificity protein phosphatase 26	DUS26	Q9BV47	78986	DUSP26	8967-6	SL018795	0.36578	0.135497	2.69954	0.265574	0.631354	0.100206	292	0.00712823	0.290572	0.539048
cubilin	cubilin	O60494	8029	CUBN	12904-180	SL004440	-0.29161	0.108076	-2.69818	0.21183	-0.0797798	-0.50344	292	0.00717455	0.543954	0.737532
26S proteasome non-ATPase regulatory subunit 11	PSD11	O00231	5717	PSMD11	13572-43	SL010941	0.427636	0.159097	2.6879	0.31183	0.739466	0.115807	292	0.00725807	0.0752836	0.274379
UPF0696 protein C11orf68	CK068	Q9H3H3	83638	C11orf68	8307-47	SL018439	0.405063	0.150638	2.68897	0.295251	0.700314	0.109811	292	0.00731746	0.104891	0.323869
Oxygen-dependent coproporphyrinogen-III oxidase, mitochondrial	HEM6	P36551	1371	CPOX	18241-18	SL020919	0.2745	0.102021	2.69062	0.199961	0.474462	0.0745385	292	0.00733195	0.59405	0.770746
Syntaxin-6	Syntaxin-6	O43752	10228	STX6	10945-11	SL006065	0.389221	0.144916	2.68584	0.284035	0.673256	0.105186	292	0.00733462	0.256604	0.506561
Regulator of G-protein signaling 18	RGS18	Q9NS28	64407	RGS18	13982-33	SL016529	0.416262	0.155014	2.68532	0.303827	0.720089	0.112435	292	0.00737915	0.0576966	0.240201
Neutral ceramidase	ASAH2	Q9NR71	56624	ASAH2	3212-30	SL010375	-0.261445	0.0971651	-2.69073	0.190444	-0.0710017	-0.451889	292	0.00738456	0.676587	0.822549
Synaptotagmin-like protein 4	SYTL4	Q96C24	94121	SYTL4	9090-9	SL016500	0.420349	0.156628	2.68373	0.306991	0.72734	0.113357	292	0.00738805	0.074642	0.273207
Importin subunit alpha-7	IMA7	O60684		KPNA6	13969-24	SL020292	0.424475	0.158186	2.68338	0.310045	0.73452	0.114429	292	0.00738967	0.0597013	0.244338
Phosphoglucomutase-1	PGM1	P36871	5236	PGM1	9173-21	SL008094	0.268263	0.0998027	2.68793	0.195613	0.463877	0.0726499	292	0.00739138	0.656375	0.81017
Netrin-4	NET4	Q9HB63	59277	NTN4	3327-27	SL007673	-0.296744	0.110594	-2.68318	0.216765	-0.0799793	-0.513508	292	0.00743295	0.590097	0.768178
Adapter molecule crk	CRK	P46108	1398	CRK	4976-57	SL013240	0.424698	0.158435	2.68058	0.310533	0.735231	0.114165	292	0.00750373	0.053535	0.231376
Protein delta homolog 1	DLK1	P80370	8788	DLK1	6496-60	SL000679	-0.16707	0.0624791	-2.67401	0.122459	-0.0446106	-0.289529	292	0.00758052	0.813444	0.901912
14-3-3 protein gamma	14-3-3 protein gamma	P61981	7532	YWHAG	8901-40	SL004989	0.426061	0.159192	2.6764	0.312016	0.738077	0.114045	292	0.00760511	0.018629	0.136488
Phosphomevalonate kinase	PMVK	Q15126	10654	PMVK	12450-42	SL016459	0.397104	0.148366	2.67651	0.290798	0.687902	0.106306	292	0.00761754	0.14629	0.382479
Neutrophil collagenase	MMP-8	P22894	4317	MMP8	9172-69	SL000526	-0.332114	0.124244	-2.67308	0.243518	-0.0885957	-0.575632	292	0.00762485	0.464089	0.68124
Activating signal cointegrator 1 complex subunit 1	ASCC1	Q8N9N2	51008	ASCC1	10647-18	SL017894	0.343605	0.128732	2.66915	0.252316	0.595921	0.09129	292	0.007625	0.330998	0.575325
Protein S100-A4	S100A4	P26447	6275	S100A4	14116-129	SL004821	0.357659	0.1338	2.67308	0.262249	0.619908	0.0954107	292	0.00763936	0.282208	0.531233
Small integral membrane protein 9	CX068	A6NGZ8	100132963	SMIM9	8888-33	SL018720	0.31988	0.120134	2.6627	0.235462	0.555342	0.0844181	292	0.00776508	0.501394	0.708092
Protein tyrosine phosphatase type IVA 2	TP4A2	Q12974	8073	PTP4A2	11699-16	SL014919	0.405258	0.151927	2.66745	0.297777	0.703034	0.107481	292	0.00777088	0.107695	0.328169
UDP-glucuronosyltransferase 1-6	UGT 1A6	P19224	54578	UGT1A6	7891-45	SL000609	-0.274189	0.102551	-2.67367	0.201	-0.0731882	-0.475189	292	0.00777631	0.637891	0.798681
Bcl2-associated agonist of cell death	BAD	Q92934	572	BAD	5870-23	SL003700	0.420629	0.157791	2.66574	0.30927	0.729899	0.11136	292	0.0077782	0.0619365	0.24887
Centromere protein W	CENPW	Q5EE01	387103	CENPW	8864-59	SL018718	-0.317616	0.119156	-2.66555	0.233545	-0.0840704	-0.551161	292	0.00779789	0.31759	0.563551
Complement component C1q receptor	C1QR1	Q9NPY3	22918	CD93	14136-234	SL007696	0.25974	0.0971668	2.67314	0.190447	0.450187	0.0692934	292	0.00780432	0.652351	0.807682
Thrombospondin-2	TSP2	P35442	7058	THBS2	14111-15	SL007206	-0.262221	0.0982448	-2.66906	0.19256	-0.0696615	-0.454781	292	0.00785611	0.649041	0.805631
Voltage-dependent calcium channel subunit alpha-2/delta-3	CA2D3	Q8IZS8	55799	CACNA2D3	8885-6	SL018710	0.268418	0.100746	2.66431	0.197461	0.465879	0.0709565	292	0.00787848	0.594407	0.770978
Neuromodulin	NEUM	P17677	2596	GAP43	15325-14	SL007137	0.413813	0.155469	2.6617	0.30472	0.718533	0.109093	292	0.00791794	0.0672182	0.259265
Amphiregulin	AREG	P15514	374	AREG	2970-60	SL000136	0.41429	0.155861	2.65807	0.305488	0.719777	0.108802	292	0.00794456	0.104615	0.323442
Protein phosphatase 1L	PPM1L	Q5SGD2	151742	PPM1L	7187-3	SL018119	0.409891	0.154465	2.65362	0.302751	0.712642	0.10714	292	0.0080554	0.111927	0.334555
Hepatoma-derived growth factor-like protein 1	HDGL1	Q5TGJ6	154150	HDGFL1	18898-36	SL021221	0.272664	0.102837	2.65142	0.201561	0.474225	0.0711036	292	0.00805829	0.636625	0.797888
Pyridoxal phosphate phosphatase	PLPP	Q96GD0	57026	PDXP	3897-61	SL011709	0.421943	0.158982	2.65404	0.311604	0.733547	0.11034	292	0.00806576	0.0575234	0.23984
Baculoviral IAP repeat-containing protein 2	cIAP-1	Q13490	329	BIRC2	10046-55	SL003727	0.335226	0.126386	2.65239	0.247717	0.582942	0.0875087	292	0.00808413	0.36697	0.605781
					8822-163		-0.299344	0.112934	-2.65061	0.221351	-0.0779937	-0.520695	292	0.00812247	0.524399	0.724154
Polyadenylate-binding protein 4	PABP4	Q13310		PABPC4	12603-87	SL019780	0.400273	0.150966	2.65142	0.295892	0.696165	0.10438	292	0.0081234	0.1064	0.32619
Grancalcin	GRAN	P28676		GCA	12594-5	SL019772	0.352347	0.13284	2.65241	0.260367	0.612713	0.0919801	292	0.00816845	0.311089	0.557754
Calcitonin gene-related peptide 2	CALCB	P10092	797	CALCB	17170-15	SL011502	0.282841	0.106619	2.65283	0.208972	0.491813	0.0738688	292	0.00818285	0.561352	0.749234
N-myc-interactor	NMI	Q13287	9111	NMI	17512-2	SL007402	0.415404	0.156733	2.65039	0.307196	0.7226	0.108207	292	0.00818427	0.065231	0.255404
Epidermal growth factor receptor	ERBB1	P00533	1956	EGFR	2677-1	SL002644	0.233932	0.0885116	2.64295	0.173483	0.407415	0.0604494	292	0.00818789	0.597677	0.773096
Statherin	STAT	P02808	6779	STATH	17172-19	SL007073	0.23305	0.0877769	2.65503	0.172043	0.405092	0.0610072	292	0.00821995	0.725206	0.85159
Leucine-rich repeat-containing G-protein coupled receptor 5	LGR5	O75473	8549	LGR5	16296-43	SL017638	-0.284841	0.107556	-2.64829	0.210811	-0.07403	-0.495651	292	0.00827641	0.541788	0.736063
Fibroblast growth factor 16	FGF-16	O43320	8823	FGF16	4393-3	SL004334	0.423281	0.160245	2.64147	0.31408	0.73736	0.109201	292	0.00835615	0.0477463	0.218509
DnaJ homolog subfamily C member 30	DJC30	Q96LL9	84277	DNAJC30	7866-11	SL018279	0.387605	0.146758	2.64112	0.287645	0.67525	0.09996	292	0.00835751	0.184832	0.429921
Transcriptional activator protein Pur-beta	PURB	Q96QR8	5814	PURB	18300-39	SL015153	0.421953	0.159717	2.64187	0.313046	0.734999	0.108907	292	0.00837549	0.0471853	0.217222
Seizure 6-like protein 2	SE6L2	Q6UXD5	26470	SEZ6L2	3867-49	SL011630	0.413055	0.156411	2.64082	0.306566	0.719621	0.106489	292	0.00838756	0.087319	0.295498
Ubiquitin carboxyl-terminal hydrolase 8	UBP8	P40818		USP8	13450-49	SL020113	0.411043	0.155706	2.63986	0.305184	0.716226	0.105859	292	0.00839077	0.0828502	0.287837
DNA-binding protein inhibitor ID-1	ID-1	P41134	3397	ID1	15402-2	SL005354	0.314109	0.118771	2.64466	0.232791	0.5469	0.0813181	292	0.00844716	0.47117	0.686418
Bone morphogenetic protein 1	BMP-1	P13497	649	BMP1	3348-49	SL003994	-0.338034	0.128177	-2.63725	0.251226	-0.0868073	-0.58926	292	0.00845634	0.156605	0.395734
ADP-ribosylation factor-like protein 5A	ARL5A	Q9Y689	26225	ARL5A	18414-26	SL021357	0.366863	0.139352	2.63264	0.273129	0.639992	0.0937333	292	0.00850658	0.27794	0.5272
Hsp90 co-chaperone Cdc37	CDC37	Q16543	11140	CDC37	3879-50	SL011232	0.407516	0.154584	2.63622	0.302984	0.7105	0.104532	292	0.00851104	0.103231	0.321296
Intestinal-type alkaline phosphatase	Alkaline phosphatase, intestine	P09923	248	ALPI	17441-4	SL002514	-0.311749	0.118281	-2.63567	0.23183	-0.0799188	-0.543579	292	0.00856051	0.516174	0.718452
Histo-blood group ABO system transferase	BGAT	P16442	28	ABO	9253-52	SL017264	0.163254	0.0619024	2.63728	0.121329	0.284583	0.0419255	292	0.00863856	0.882949	0.939654
Heat shock protein beta-1	HSP 27	P04792	3315	HSPB1	11103-24	SL000448	0.381	0.145019	2.62725	0.284237	0.665238	0.0967632	292	0.0086937	0.192307	0.438528
Mitogen-activated protein kinase 3	ERK-1	P27361	5595	MAPK3	2855-49	SL000409	0.400457	0.152251	2.63024	0.298412	0.69887	0.102045	292	0.00869764	0.111766	0.334314
Interferon alpha-8	IFNA8	P32881	3445	IFNA8	6214-84	SL017259	0.305985	0.116345	2.62997	0.228037	0.534021	0.0779479	292	0.00873928	0.544434	0.737858
Protein disulfide-isomerase A5	PDIA5	Q14554	10954	PDIA5	5593-11	SL011222	0.384639	0.146354	2.62815	0.286853	0.671492	0.0977864	292	0.00878907	0.175165	0.418527
Tropomodulin-1	TMOD1	P28289	7111	TMOD1	12595-11	SL010848	0.368298	0.139998	2.63074	0.274396	0.642695	0.0939022	292	0.00878956	0.109095	0.330296
39S ribosomal protein L32, mitochondrial	RM32	Q9BYC8	64928	MRPL32	7982-10	SL018355	-0.311148	0.11857	-2.62417	0.232397	-0.0787508	-0.543545	292	0.00879103	0.521231	0.721963
Charged multivesicular body protein 2b	CHM2B	Q9UQN3	25978	CHMP2B	17350-13	SL009112	0.380184	0.144741	2.62665	0.283692	0.663876	0.0964915	292	0.00880006	0.158065	0.397574
Type II inositol 1,4,5-trisphosphate 5-phosphatase	I5P2	P32019		INPP5B	12641-3	SL019813	0.412231	0.157227	2.62188	0.308166	0.720397	0.104065	292	0.00886209	0.0649744	0.254901
Platelet-activating factor acetylhydrolase IB subunit beta	PAFAH beta subunit	P68402	5049	PAFAH1B2	2642-4	SL004760	0.414678	0.157839	2.62722	0.309364	0.724042	0.105313	292	0.00888108	0.06987	0.264329
Density-regulated protein	DENR	O43583	8562	DENR	19287-59	SL007009	0.413607	0.157902	2.61939	0.309489	0.723096	0.104119	292	0.00890147	0.12187	0.349099
Disks large homolog 4	DLG4	P78352	1742	DLG4	8070-88	SL018372	0.389027	0.14867	2.61672	0.291392	0.680419	0.0976344	292	0.00890272	0.173486	0.416516
Ubiquitin-fold modifier 1	UFM1	P61960	51569	UFM1	3836-51	SL010528	0.39783	0.151692	2.62262	0.297316	0.695146	0.100514	292	0.0089071	0.113278	0.336568
Calcineurin B homologous protein 3	TESC	Q96BS2	54997	TESC	12831-21	SL015132	0.387409	0.148031	2.61709	0.29014	0.677549	0.097269	292	0.00892587	0.186314	0.431641
Peptidyl-prolyl cis-trans isomerase-like 1	PPIL1	Q9Y3C6	51645	PPIL1	9884-8	SL019142	0.382256	0.145922	2.61959	0.286007	0.668263	0.0962486	292	0.00894383	0.241535	0.491463
Drebrin-like protein	DBNL	Q9UJU6	28988	DBNL	4978-54	SL011628	0.370532	0.14163	2.6162	0.277595	0.648127	0.0929372	292	0.00895722	0.230914	0.480535
Vacuolar protein sorting-associated protein 4A	VPS4A	Q9UN37	27183	VPS4A	11476-43	SL009023	0.405276	0.15478	2.61841	0.303368	0.708644	0.101908	292	0.00895783	0.0593242	0.243566
Kallikrein-10	kallikrein 10	O43240	5655	KLK10	6227-1	SL003923	0.275046	0.104883	2.6224	0.205571	0.480618	0.0694748	292	0.00900218	0.584492	0.76452
60S acidic ribosomal protein P2	RLA2	P05387	6181	RPLP2	10949-59	SL008009	0.278694	0.106584	2.61478	0.208905	0.487599	0.069789	292	0.00902055	0.627561	0.792188
Vesicular integral-membrane protein VIP36	Lectin, mannose-binding 2	Q12907	10960	LMAN2	9468-8	SL005403	-0.247121	0.094471	-2.61584	0.185163	-0.0619577	-0.432284	292	0.00903468	0.636907	0.798064
Serotransferrin	Transferrin	P02787	7018	TF	4162-54	SL000601	0.341863	0.130938	2.61087	0.256639	0.598501	0.0852239	292	0.00904339	0.160925	0.401155
3-ketoacyl-CoA thiolase, peroxisomal	THIK	P09110	30	ACAA1	17782-23	SL020988	-0.29718	0.113735	-2.61291	0.222921	-0.0742589	-0.520101	292	0.00909192	0.47229	0.687234
Reticulon-4-interacting protein 1, mitochondrial	RT4I1	Q8WWV3	84816	RTN4IP1	18180-58	SL020948	0.392949	0.150616	2.60895	0.295208	0.688157	0.0977418	292	0.0091131	0.149145	0.386193
Protein DJ-1	PARK7	Q99497	11315	PARK7	19523-215	SL008933	0.398793	0.15292	2.60786	0.299723	0.698516	0.0990705	292	0.00918856	0.138468	0.372113
Hydroxyacid oxidase 1	HAOX1	Q9UJM8	54363	HAO1	17768-50	SL020969	-0.274193	0.104975	-2.61199	0.20575	-0.0684424	-0.479943	292	0.00920744	0.579676	0.761365
Protein tyrosine phosphatase type IVA 3	PRL-3	O75365	11156	PTP4A3	19231-22	SL002051	0.326203	0.125169	2.6061	0.245332	0.571534	0.0808713	292	0.00924517	0.349226	0.590954
D-dopachrome decarboxylase	D-dopachrome decarboxylase	P30046	1652	DDT	19237-17	SL004808	0.292688	0.111981	2.61374	0.219483	0.512171	0.0732059	292	0.00935301	0.559022	0.747678
Phosducin-like protein 2	PDCL2	Q8N4E4		PDCL2	14192-31	SL019930	0.337664	0.129861	2.60019	0.254527	0.592191	0.0831362	292	0.00939301	0.397598	0.630554
Lysophospholipase-like protein 1	LYPL1	Q5VWZ2	127018	LYPLAL1	12428-2	SL015008	0.327611	0.125782	2.60459	0.246533	0.574143	0.0810781	292	0.00939801	0.408765	0.639347
Neurocalcin-delta	NCALD	P61601	83988	NCALD	17816-58	SL020927	0.320574	0.123091	2.60437	0.241258	0.561832	0.0793159	292	0.00940529	0.441183	0.664216
Synaptic vesicle membrane protein VAT-1 homolog	VAT1	Q99536	10493	VAT1	18175-65	SL008286	0.275638	0.106048	2.59917	0.207855	0.483493	0.0677835	292	0.00941758	0.47576	0.689754
Alanine--tRNA ligase, cytoplasmic	SYAC	P49588	16	AARS	12340-17	SL011196	0.395336	0.15194	2.60192	0.297803	0.69314	0.0975334	292	0.00945589	0.106242	0.325948
ADP-ribosylation factor-like protein 11	ARL11	Q969Q4	115761	ARL11	12433-8	SL019709	0.360311	0.138884	2.59434	0.272212	0.632523	0.0880989	292	0.00946181	0.21487	0.463541
Glutamine synthetase	GLNA	P15104	2752	GLUL	19238-12	SL008477	-0.324397	0.12476	-2.60016	0.24453	-0.079867	-0.568928	292	0.00957964	0.373588	0.611218
Alpha- and gamma-adaptin-binding protein p34	P34	Q6PD74	79719	AAGAB	11926-23	SL012582	0.368176	0.141901	2.59459	0.278127	0.646303	0.0900495	292	0.00958386	0.220135	0.469186
Ubiquitin-associated and SH3 domain-containing protein B	UBS3B	Q8TF42	84959	UBASH3B	12558-3	SL011269	0.421286	0.162513	2.59232	0.318525	0.739812	0.102761	292	0.00962086	0.0281018	0.167636
Adseverin	ADSV	Q9Y6U3	85477	SCIN	12684-5	SL019836	-0.364457	0.140542	-2.59323	0.275461	-0.0889954	-0.639918	292	0.00962284	0.314182	0.560519
UBX domain-containing protein 2B	UBX2B	Q14CS0	137886	UBXN2B	18435-40	SL021481	0.374074	0.144119	2.5956	0.282473	0.656547	0.0916016	292	0.00966413	0.195384	0.442022
					9613-16		-0.296535	0.114369	-2.59279	0.224164	-0.0723718	-0.520699	292	0.00973999	0.562531	0.750021
ATP-dependent RNA helicase DDX19A	DD19A	Q9NUU7	55308	DDX19A	18813-15	SL021131	0.383767	0.148264	2.5884	0.290598	0.674365	0.0931693	292	0.00978021	0.0957147	0.309378
Interleukin-21	IL-21	Q9HBE4	59067	IL21	7124-18	SL005150	0.274802	0.10604	2.5915	0.207838	0.48264	0.0669638	292	0.00978259	0.368709	0.607214
Platelet-derived growth factor receptor beta	PDGF Rb	P09619	5159	PDGFRB	3459-49	SL004155	0.17676	0.0684255	2.58325	0.134114	0.310874	0.0426463	292	0.00984778	0.827906	0.909894
Ephrin type-A receptor 4	EPHA4	P54764	2043	EPHA4	16288-17	SL013797	0.225133	0.0869977	2.5878	0.170516	0.395648	0.0546172	292	0.00985318	0.721248	0.849263
Zinc finger protein 264	ZN264	O43296	9422	ZNF264	9993-11	SL019212	-0.35244	0.136212	-2.58743	0.266976	-0.0854636	-0.619416	292	0.00987757	0.322096	0.567535
Neutrophil gelatinase-associated lipocalin	Lipocalin 2	P80188	3934	LCN2	2836-68	SL000695	0.234801	0.0906077	2.5914	0.177591	0.412392	0.0572099	292	0.00988985	0.673099	0.820426
Cathepsin O	CATO	P43234	1513	CTSO	9264-11	SL017119	-0.338519	0.131081	-2.58252	0.256919	-0.0816005	-0.595438	292	0.0099338	0.388313	0.623148
Promotilin	MOTI	P12872	4295	MLN	5631-83	SL008634	-0.220646	0.085316	-2.58622	0.167219	-0.0534269	-0.387865	292	0.00995112	0.616189	0.784977
Calpain-3	CAN3	P20807	825	CAPN3	12385-4	SL006471	0.283964	0.109888	2.58413	0.21538	0.499343	0.0685837	292	0.00995265	0.516605	0.718752
Acidic fibroblast growth factor intracellular-binding protein	FIBP	O43427	9158	FIBP	19169-88	SL007005	0.392652	0.152232	2.5793	0.298375	0.691027	0.0942767	292	0.00998461	0.106385	0.326167
Phosphoglycerate mutase 1	Phosphoglycerate mutase 1	P18669	5223	PGAM1	3896-5	SL004820	0.349407	0.135998	2.56921	0.266556	0.615963	0.0828509	292	0.0100087	0	0
Stathmin-3	STMN3	Q9NZ72	50861	STMN3	8019-73	SL018403	0.389828	0.15104	2.58096	0.296038	0.685867	0.0937904	292	0.0100317	0.193526	0.439916
SH3 domain-binding glutamic acid-rich-like protein	SH3L1	O75368	6451	SH3BGRL	12693-2	SL008627	0.384404	0.1487	2.5851	0.291451	0.675855	0.0929526	292	0.0100492	0.157433	0.396778
NEDD8-conjugating enzyme UBE2F	UBE2F	Q969M7	140739	UBE2F	18213-30	SL016497	0.375912	0.145848	2.57741	0.285863	0.661775	0.0900489	292	0.010058	0.174151	0.417314
Apolipoprotein L1	Apo L1	O14791	8542	APOL1	11510-31	SL005699	-0.191182	0.0740459	-2.58194	0.14513	-0.0460518	-0.336312	292	0.0100827	0.760648	0.872151
3-hydroxyanthranilate 3,4-dioxygenase	3HAO	P46952	23498	HAAO	5861-78	SL008466	0.285487	0.11101	2.57171	0.21758	0.503067	0.0679064	292	0.010122	0.530536	0.728379
Lysosome-associated membrane glycoprotein 1	LAMP1	P11279	3916	LAMP1	16902-17	SL008407	0.232302	0.0898184	2.58636	0.176044	0.408346	0.0562583	292	0.0101426	0.706054	0.84027
Glutathione peroxidase 1	Glutathione peroxidase	P07203	2876	GPX1	15591-28	SL001812	0.378182	0.146935	2.57381	0.287992	0.666175	0.0901904	292	0.0101683	0.139136	0.373009
Lymphokine-activated killer T-cell-originated protein kinase	TOPK	Q96KB5	55872	PBK	17475-18	SL010511	0.266026	0.103122	2.57973	0.202119	0.468145	0.0639077	292	0.010171	0.583552	0.763906
CD9 antigen	CD9	P21926	928	CD9	17449-23	SL008836	0.277027	0.107423	2.57885	0.210548	0.487575	0.0664784	292	0.0101737	0.612103	0.78237
Ubiquitin-conjugating enzyme E2 C	UBE2C	O00762	11065	UBE2C	12556-7	SL006252	0.227559	0.0884368	2.57312	0.173336	0.400895	0.0542225	292	0.0101951	0.745097	0.86319
WAP four-disulfide core domain protein 8	WFDC8	Q8IUA0	90199	WFDC8	7147-35	SL012660	-0.378109	0.146716	-2.57715	0.287563	-0.0905458	-0.665672	292	0.0102006	0.192834	0.439129
Phosphomannomutase 2	Phosphomannomutase 2	O15305	5373	PMM2	17794-6	SL005762	0.386369	0.150299	2.57067	0.294586	0.680955	0.0917834	292	0.0102345	0.109673	0.331169
Tumor susceptibility gene 101 protein	TS101	Q99816	7251	TSG101	13044-5	SL007627	0.404145	0.157183	2.57117	0.308079	0.712224	0.0960654	292	0.0102484	0.0565465	0.237795
F-box/LRR-repeat protein 4	FBXL4	Q9UKA2	26235	FBXL4	9951-36	SL018669	0.330412	0.128533	2.57063	0.251925	0.582337	0.0784865	292	0.0102684	0.390273	0.624718
Erythropoietin	Epo	P01588	2056	EPO	5813-58	SL000408	-0.313001	0.122075	-2.56401	0.239266	-0.0737343	-0.552267	292	0.0103528	0.467007	0.683379
L-xylulose reductase	DCXR	Q7Z4W1	51181	DCXR	17758-79	SL009078	-0.313868	0.122126	-2.57004	0.239366	-0.0745016	-0.553234	292	0.0103689	0.380036	0.61647
Peroxidasin homolog	PXDN	Q92626	7837	PXDN	13463-1	SL007573	-0.223179	0.0870409	-2.56407	0.1706	-0.0525786	-0.393779	292	0.0103881	0.591904	0.769353
Rho GDP-dissociation inhibitor 2	Rho-GDI beta	P52566	397	ARHGDIB	9846-32	SL004615	0.385143	0.150123	2.56552	0.294241	0.679383	0.0909017	292	0.0104326	0.121138	0.348049
ADP-ribosylation factor-binding protein GGA1	GGA1	Q9UJY5		GGA1	13594-158	SL020181	0.400085	0.156071	2.56349	0.305898	0.705983	0.0941863	292	0.0104552	0.0811977	0.284952
Dipeptidase 2	DPEP2	Q9H4A9	64174	DPEP2	8327-26	SL018483	0.243929	0.0952046	2.56215	0.186601	0.43053	0.0573279	292	0.0104963	0.661681	0.813438
Brain-specific angiogenesis inhibitor 1-associated protein 2	BAIP2	Q9UQB8	10458	BAIAP2	19331-18	SL013299	0.261326	0.101585	2.57249	0.199106	0.460432	0.0622197	292	0.0105079	0.654777	0.809183
Proteasome assembly chaperone 3	PSMG3	Q9BT73		PSMG3	12729-12	SL019892	0.395977	0.154786	2.55822	0.30338	0.699357	0.0925964	292	0.0105859	0.105195	0.324338
14-3-3 protein zeta/delta	14-3-3 protein zeta/delta	P63104	7534	YWHAZ	5858-6	SL005688	0.378635	0.148099	2.55664	0.290274	0.668909	0.0883613	292	0.0106226	0.131978	0.363288
Glycosaminoglycan xylosylkinase	FA20B	O75063	9917	FAM20B	7198-197	SL012378	0.284917	0.111321	2.55941	0.21819	0.503107	0.0667275	292	0.0106609	0.57973	0.7614
PILR alpha-associated neural protein	PIANP	Q8IYJ0	196500	PIANP	9599-6	SL019019	0.282627	0.110403	2.55996	0.21639	0.499017	0.0662374	292	0.0106611	0.488186	0.698703
E3 ubiquitin-protein ligase NEURL1	NEUL1	O76050		NEURL1	13604-27	SL020194	0.309743	0.120632	2.56767	0.236439	0.546181	0.0733039	292	0.0106665	0.480638	0.693281
beta-adrenergic receptor kinase 1	BARK1	P25098	156	ADRBK1	3347-9	SL002792	0.397644	0.155549	2.55638	0.304877	0.702521	0.0927671	292	0.0107228	0.0663392	0.257564
Threonine--tRNA ligase, cytoplasmic	SYTC	P26639	6897	TARS	18186-15	SL013024	0.4007	0.156912	2.55367	0.307547	0.708247	0.0931536	292	0.0107921	0.0539552	0.232283
Transmembrane protein 230	TM230	Q96A57		TMEM230	11542-11	SL019529	0.339372	0.132759	2.5563	0.260208	0.59958	0.0791646	292	0.0108048	0.356246	0.596863
Elongation factor 1-beta	EF-1-beta	P24534	1933	EEF1B2	5882-34	SL005685	0.367845	0.144067	2.55329	0.282372	0.650217	0.085473	292	0.0108083	0.235939	0.485736
Membrane-associated guanylate kinase, WW and PDZ domain-containing protein 2	MAGI2	Q86UL8		MAGI2	14066-49	SL020306	0.308881	0.121256	2.54735	0.237661	0.546542	0.0712195	292	0.010828	0.425032	0.651945
Protein S100-A2	S100A2	P29034	6273	S100A2	11969-5	SL004807	0.242259	0.0947002	2.55816	0.185612	0.427871	0.0566463	292	0.0108289	0.652366	0.807692
Deoxycytidylate deaminase	DCTD	P32321	1635	DCTD	17756-69	SL020918	0.381868	0.149809	2.54903	0.293627	0.675495	0.0882418	292	0.0108915	0.121266	0.348233
Adenylosuccinate synthetase isozyme 1	PURA1	Q8N142		ADSSL1	13998-26	SL020277	-0.304123	0.119333	-2.54851	0.233894	-0.070229	-0.538016	292	0.0108915	0.421564	0.64928
Kynurenine--oxoglutarate transaminase 3	KAT3	Q6YP21		CCBL2	12682-5	SL019824	0.335146	0.131619	2.54634	0.257972	0.593119	0.0771735	292	0.0109314	0.35626	0.596875
Protein-tyrosine kinase 2-beta	FAK2	Q14289	2185	PTK2B	11395-5	SL014068	0.387346	0.152023	2.54795	0.297965	0.685311	0.0893818	292	0.0109348	0.0981227	0.313245
Docking protein 2	DOK2	O60496	9046	DOK2	19578-19	SL016379	0.398431	0.156363	2.54811	0.306472	0.704903	0.0919586	292	0.0109363	0.0610449	0.247073
RAC-beta serine/threonine-protein kinase	PKB beta	P31751	208	AKT2	5360-9	SL003722	0.391569	0.153848	2.54516	0.301543	0.693112	0.0900262	292	0.0110269	0.0870663	0.29507
O-acetyl-ADP-ribose deacetylase MACROD1	MACD1	Q9BQ69		MACROD1	13653-335	SL020203	0.281265	0.110328	2.54936	0.216243	0.497508	0.0650226	292	0.0110282	0.576743	0.759436
C-C motif chemokine 15	MIP-5	Q16663	6359	CCL15	18289-16	SL003190	-0.20541	0.0807765	-2.54294	0.158322	-0.0470881	-0.363732	292	0.0110904	0.789215	0.888378
Thiamine-triphosphatase	THTPA	Q9BU02		THTPA	13595-20	SL020185	0.303389	0.119361	2.54178	0.233947	0.537336	0.0694417	292	0.0110928	0.466002	0.682644
					10927-65		0.267044	0.105083	2.54126	0.205964	0.473007	0.0610803	292	0.0111062	0.617313	0.785693
Interleukin enhancer-binding factor 2	ILF2	Q12905	3608	ILF2	12665-16	SL014917	0.336531	0.132376	2.54222	0.259458	0.595989	0.0770728	292	0.011109	0.393383	0.627203
Sorting nexin-8	SNX8	Q9Y5X2	29886	SNX8	6925-26	SL017997	0.404167	0.159045	2.54121	0.311728	0.715895	0.0924386	292	0.0111158	0.0679767	0.260723
Nicotinamide riboside kinase 1	NRK1	Q9NWW6	54981	NRK1	16853-5	SL006756	0.3095	0.121609	2.54504	0.238354	0.547854	0.0711461	292	0.0111875	0.493007	0.702144
Teratocarcinoma-derived growth factor 1	Cripto	P13385	6997	TDGF1	5810-25	SL005155	0.160601	0.0631271	2.5441	0.123729	0.28433	0.0368723	292	0.0112016	0.850887	0.922436
Uncharacterized protein C11orf87	CK087	Q6NUJ2		C11orf87	11116-16	SL018991	0.341847	0.134752	2.53687	0.264114	0.605961	0.0777337	292	0.0112027	0.369959	0.608243
Uncharacterized protein C11orf94	CK094	C9JXX5	143678	C11orf94	8383-20	SL018492	0.373807	0.147272	2.5382	0.288654	0.662461	0.0851529	292	0.0112113	0.180444	0.424787
Interferon lambda-1	IFN-lambda 1	Q8IU54	282618	IFNL1	4396-54	SL004348	0.402339	0.158613	2.53661	0.310881	0.713219	0.0914581	292	0.0112547	0.0671997	0.259229
Platelet-derived growth factor C	PDGF-CC	Q9NRA1	56034	PDGFC	13658-31	SL011071	0.341738	0.134422	2.54227	0.263468	0.605206	0.0782702	292	0.011279	0.327008	0.571846
Fc receptor-like protein 4	FCRL4	Q96PJ5	83417	FCRL4	8991-115	SL018774	0.344634	0.135978	2.53449	0.266516	0.611151	0.078118	292	0.0113791	0.32113	0.566683
Nuclear receptor ROR-gamma	RORG	P51449		RORC	11827-7	SL019486	0.287765	0.113525	2.53481	0.222509	0.510275	0.0652558	292	0.0114254	0.512195	0.715678
Rho guanine nucleotide exchange factor 25	ARHGP	Q86VW2	115557	ARHGEF25	13519-112	SL020123	0.28403	0.112238	2.53061	0.219986	0.504016	0.064044	292	0.0114525	0.533256	0.730244
Protein kinase C-binding protein NELL2	NELL2	Q99435	4753	NELL2	6022-57	SL005091	0.266801	0.105432	2.53054	0.206647	0.473448	0.0601534	292	0.0114655	0.565099	0.751731
Killer cell immunoglobulin-like receptor 2DL5A	KI2LA	Q8N109	57292	KIR2DL5A	8000-17	SL018254	0.179824	0.0706742	2.54441	0.138521	0.318345	0.0413024	292	0.0114709	0.836695	0.914711
cAMP-regulated phosphoprotein 19	ARP19	P56211	10776	ARPP19	4963-19	SL011708	0.355848	0.14071	2.52895	0.275791	0.631639	0.0800567	292	0.0115061	0.223135	0.472371
Signal transducer and activator of transcription 1-alpha/beta	STAT1	P42224	6772	STAT1	10370-21	SL004396	0.415129	0.164837	2.51841	0.323081	0.73821	0.0920472	292	0.0116152	0.00117554	0.0342862
BAG family molecular chaperone regulator 1	BAG-1	Q99933	573	BAG1	17195-43	SL000023	0.384987	0.152599	2.52287	0.299093	0.68408	0.0858936	292	0.0116961	0.0753229	0.27445
PDZ and LIM domain protein 1	PDLI1	O00151	9124	PDLIM1	11428-31	SL006955	0.371581	0.147158	2.52505	0.288429	0.66001	0.0831518	292	0.0116967	0.0975052	0.312258
Triosephosphate isomerase	Triosephosphate isomerase	P60174	7167	TPI1	4309-59	SL004812	0.388305	0.153927	2.52266	0.301696	0.690001	0.0866088	292	0.0117396	0.117264	0.342439
Transcription factor TFIIIB component B'' homolog	BDP1	A6H8Y1	55814	BDP1	8929-7	SL018696	-0.337071	0.133538	-2.52415	0.261735	-0.0753359	-0.598807	292	0.0117567	0.24104	0.490959
Transmembrane protein 190	TM190	Q8WZ59	147744	TMEM190	10442-1	SL018089	0.140717	0.055751	2.52403	0.109272	0.249989	0.0314452	292	0.0117567	0.895932	0.946537
Methylmalonate-semialdehyde dehydrogenase [acylating], mitochondrial	MMSA	Q02252	4329	ALDH6A1	19136-22	SL007346	0.36415	0.144531	2.51953	0.28328	0.64743	0.0808693	292	0.0117965	0.202084	0.449538
Dual 3',5'-cyclic-AMP and -GMP phosphodiesterase 11A	PDE11	Q9HCR9	50940	PDE11A	5252-33	SL016555	0.379028	0.150527	2.51802	0.295032	0.674061	0.0839963	292	0.0118042	0.133919	0.36595
Cdc42-interacting protein 4	CIP4	Q15642	9322	TRIP10	17676-13	SL011229	0.382351	0.151644	2.52138	0.297221	0.679572	0.0851298	292	0.0118081	0.10363	0.321916
E3 ubiquitin-protein ligase rififylin	RFFL	Q8WZ73		RFFL	14186-13	SL019795	0.247393	0.098056	2.52298	0.19219	0.439583	0.0552034	292	0.0118284	0.670737	0.818986
					13021-12		-0.313166	0.12429	-2.51963	0.243609	-0.0695567	-0.556775	292	0.0118335	0.413157	0.642773
Uncharacterized protein C10orf35	CJ035	Q96D05	219738	C10orf35	8220-15	SL018432	0.228028	0.0906037	2.51676	0.177583	0.405611	0.0504446	292	0.0118926	0.692339	0.832069
Peptidyl-prolyl cis-trans isomerase A	Cyclophilin A	P62937	5478	PPIA	3844-2	SL004823	0.379286	0.15075	2.516	0.295469	0.674755	0.0838163	292	0.0119495	0.131406	0.362499
Glutathione reductase, mitochondrial	Glutathione reductase	P00390	2936	GSR	19273-3	SL000434	0.28707	0.114335	2.51078	0.224097	0.511167	0.0629737	292	0.0119518	0.503002	0.709226
Ubiquitin-protein ligase E3A	UBE3A	Q05086		UBE3A	11226-16	SL019352	0.402319	0.159893	2.51617	0.313391	0.71571	0.0889274	292	0.0119614	0.0628769	0.250753
Leucine-rich repeat transmembrane neuronal protein 2	LRRT2	O43300	26045	LRRTM2	6904-14	SL018013	0.281786	0.111664	2.52352	0.218862	0.500648	0.0629245	292	0.0119642	0.511428	0.715142
Polyadenylate-binding protein 3	PABP3	Q9H361	5042	PABPC3	10447-18	SL018138	0.382752	0.152151	2.51561	0.298216	0.680967	0.0845361	292	0.01199	0.129895	0.360409
Low density lipoprotein receptor adapter protein 1	ARH	Q5SW96	26119	LDLRAP1	18183-3	SL020981	0.39994	0.158981	2.51565	0.311602	0.711542	0.0883383	292	0.0120133	0.040255	0.200637
Prolyl endopeptidase	PPCE	P48147	5550	PREP	14273-19	SL010939	0.373339	0.148386	2.51599	0.290837	0.664176	0.0825014	292	0.0120248	0.108833	0.329898
Leucine-rich repeat transmembrane neuronal protein 1	LRRT1	Q86UE6	347730	LRRTM1	19360-22	SL014096	0.257184	0.102444	2.51049	0.20079	0.457973	0.0563943	292	0.0120353	0.643844	0.802399
BolA-like protein 2	BolA-like protein 2	Q9H3K6	552900	BOLA2	8404-102	SL010249	0.248556	0.0987873	2.51608	0.193623	0.442179	0.0549331	292	0.0120359	0.61022	0.781166
Sodium/potassium-transporting ATPase subunit beta-2	AT1B2	P14415	482	ATP1B2	7218-87	SL018093	0.298928	0.118929	2.5135	0.233101	0.532029	0.0658277	292	0.0120949	0.475255	0.689388
Ribosomal protein S6 kinase alpha-3	RPS6KA3	P51812	6197	RPS6KA3	3469-74	SL010515	0.393277	0.156598	2.51138	0.306932	0.70021	0.0863448	292	0.012104	0.070986	0.266432
Complement receptor type 1	Complement receptor type 1	P17927	1378	CR1	19556-12	SL004554	-0.145748	0.0580429	-2.51105	0.113764	-0.0319844	-0.259512	292	0.0121095	0.826871	0.909324
Thymidine kinase 2, mitochondrial	KITM	O00142	7084	TK2	19114-8	SL014563	0.331222	0.131816	2.51275	0.25836	0.589582	0.072862	292	0.0121264	0.353194	0.594301
Galanin-like peptide	GALP	Q9UBC7	85569	GALP	9398-30	SL012858	-0.282369	0.112291	-2.51462	0.220091	-0.0622785	-0.50246	292	0.0121908	0.442946	0.665542
Autophagy protein 5	Autophagy protein 5	Q9H1Y0	9474	ATG5	12597-68	SL019171	0.366541	0.146089	2.50902	0.286335	0.652876	0.0802063	292	0.0121919	0.182079	0.426708
Tyrosine-protein phosphatase non-receptor type 7	PTN7	P35236		PTPN7	14688-6	SL020212	0.311779	0.124131	2.5117	0.243296	0.555075	0.0684833	292	0.012233	0.454846	0.674422
Serpin A11	SPA11	Q86U17	256394	SERPINA11	9002-36	SL006615	0.227729	0.0906664	2.51172	0.177706	0.405435	0.0500229	292	0.0122518	0.605553	0.778173
IQ domain-containing protein F3	IQCF3	P0C7M6		IQCF3	13439-6	SL020093	-0.299682	0.119473	-2.50838	0.234166	-0.0655161	-0.533849	292	0.0122634	0.361231	0.601025
Ubiquilin-4	UBQL4	Q9NRR5		UBQLN4	12720-71	SL019882	0.384643	0.153468	2.50633	0.300798	0.685441	0.0838451	292	0.0122982	0.0989631	0.314584
Biogenesis of lysosome-related organelles complex 1 subunit 5	MUTED	Q8TDH9	63915	MUTED	19116-1	SL006668	-0.305665	0.121766	-2.51026	0.238662	-0.0670033	-0.544327	292	0.012319	0.374253	0.611762
Ras-related protein Rab-5A	RAB5A	P20339	5868	RAB5A	17205-21	SL021017	0.384461	0.153525	2.50422	0.30091	0.68537	0.0835513	292	0.0123597	0.112195	0.334955
Citrate synthase, mitochondrial	CISY	O75390	1431	CS	18309-18	SL007981	0.388544	0.155407	2.50017	0.304598	0.693142	0.0839461	292	0.0124893	0.0933375	0.305512
Peptidyl-prolyl cis-trans isomerase FKBP1B	FKB1B	P68106	2281	FKBP1B	11568-2	SL007323	0.375383	0.150192	2.49936	0.294376	0.66976	0.0810071	292	0.012511	0.118566	0.344335
Peroxiredoxin-6	Peroxiredoxin-6	P30041	9588	PRDX6	5018-68	SL005694	0.385492	0.154217	2.49968	0.302265	0.687757	0.0832277	292	0.0125179	0.149512	0.386667
Glycine N-methyltransferase	GNMT	Q14749		GNMT	14006-36	SL020278	-0.264649	0.105633	-2.50537	0.20704	-0.0576087	-0.471689	292	0.0125389	0.614936	0.784179
Thioredoxin domain-containing protein 12	TXD12	O95881	51060	TXNDC12	19334-62	SL016128	0.392239	0.15698	2.49866	0.307681	0.699919	0.0845583	292	0.0125847	0.0585529	0.241977
Fibroblast growth factor 19	FGF-19	O95750	9965	FGF19	13724-27	SL004337	0.360734	0.143806	2.50847	0.28186	0.642594	0.0788738	292	0.0125884	0.265115	0.514893
Cytokine receptor common subunit gamma	IL-2 sRg	P31785	3561	IL2RG	2634-2	SL003307	0.394438	0.157975	2.49684	0.309631	0.704069	0.0848075	292	0.0126076	0.068947	0.262578
Alcohol dehydrogenase class 4 mu/sigma chain	ADH7	P40394	131	ADH7	11377-19	SL019442	0.282817	0.113168	2.4991	0.221808	0.504626	0.061009	292	0.0126475	0.551723	0.742781
Isovaleryl-CoA dehydrogenase, mitochondrial	IVD	P26440	3712	IVD	17737-7	SL011185	0.35926	0.144496	2.4863	0.283211	0.642471	0.0760484	292	0.0129949	0.18059	0.424959
Cas scaffolding protein family member 4	CT032	Q9NQ75	57091	CASS4	12855-16	SL011299	0.377043	0.151756	2.48454	0.297441	0.674485	0.079602	292	0.0130384	0.104029	0.322536
Heterogeneous nuclear ribonucleoprotein F	HNRPF	P52597	3185	HNRNPF	9764-79	SL008128	0.410933	0.166015	2.47527	0.32539	0.736323	0.0855432	292	0.0130685	0	0
Nuclear protein localization protein 4 homolog	NPL4	Q8TAT6	55666	NPLOC4	12993-21	SL016487	0.384037	0.154679	2.4828	0.30317	0.687207	0.0808663	292	0.0131484	0.0701687	0.264894
CMRF35-like molecule 1	CLM1	Q8TDQ1	146722	CD300LF	5623-11	SL012737	-0.304976	0.122617	-2.48723	0.240329	-0.0646477	-0.545305	292	0.0131592	0.451215	0.671726
Beta-1,3-galactosyltransferase 6	B3GT6	Q96L58	126792	B3GALT6	7981-230	SL018344	0.258334	0.103865	2.48721	0.203576	0.461909	0.0547583	292	0.0131869	0.600362	0.77483
BH3-interacting domain death agonist	BID	P55957	637	BID	5798-3	SL003704	0.370074	0.14923	2.47989	0.292491	0.662565	0.0775836	292	0.0132556	0.19323	0.439579
Carbonyl reductase [NADPH] 3	Carbonyl reductase 3	O75828	874	CBR3	14091-42	SL005371	0.327037	0.131838	2.4806	0.258402	0.585439	0.0686353	292	0.0132613	0.36768	0.606367
Pterin-4-alpha-carbinolamine dehydratase 2	PHS2	Q9H0N5	84105	PCBD2	6899-37	SL018031	0.341861	0.137758	2.48161	0.270006	0.611867	0.0718554	292	0.0132828	0.117395	0.342629
C4b-binding protein beta chain	C4b-binding protein beta chain	P20851	725	C4BPB	7155-46	SL015990	0.258813	0.104436	2.4782	0.204695	0.463508	0.0541189	292	0.0132998	0.557982	0.746982
Mitotic checkpoint serine/threonine-protein kinase BUB1	BUB1	O43683	699	BUB1	12033-3	SL007012	0.306992	0.123935	2.47704	0.242912	0.549905	0.0640798	292	0.0133086	0.459229	0.677665
Platelet-activating factor acetylhydrolase 2, cytoplasmic	PAFA2	Q99487	5051	PAFAH2	18914-188	SL017168	0.345113	0.139382	2.47602	0.273189	0.618302	0.0719237	292	0.0133462	0.235202	0.484976
Ribulose-phosphate 3-epimerase	RPE	Q96AT9	6120	RPE	12646-2	SL013233	0.392567	0.158484	2.47701	0.310629	0.703196	0.0819382	292	0.0134104	0.0893889	0.29898
Translin	TSN	Q15631		TSN	12477-42	SL019734	0.310305	0.125302	2.47646	0.245592	0.555897	0.0647135	292	0.0135676	0.147811	0.384463
TYMS opposite strand protein	CR056	Q8TAI1	494514	TYMSOS	8263-64	SL018450	-0.317548	0.128254	-2.47593	0.251377	-0.0661705	-0.568925	292	0.0136674	0.349019	0.590778
Heterogeneous nuclear ribonucleoprotein Q	HNRPQ	O60506	10492	SYNCRIP	4224-7	SL007022	0.36753	0.148586	2.47352	0.291228	0.658758	0.0763015	292	0.0137047	0.175343	0.41874
Probable ATP-dependent RNA helicase DDX6	DDX6	P26196		DDX6	12869-68	SL019938	0.385305	0.156227	2.46631	0.306205	0.691511	0.0791	292	0.0137131	0.0708699	0.266214
Small glutamine-rich tetratricopeptide repeat-containing protein alpha	SGTA	O43765	6449	SGTA	3868-8	SL011533	0.392025	0.158975	2.46595	0.311592	0.703617	0.0804331	292	0.0137519	0.0658957	0.256702
Glutathione S-transferase Mu 4	GSTM4	Q03013	2948	GSTM4	18895-54	SL014901	0.292521	0.118785	2.46261	0.232819	0.525339	0.0597021	292	0.0138327	0.486167	0.697257
Slit homolog 2 protein	SLIT2	O94813	9353	SLIT2	18930-28	SL008427	0.276762	0.112334	2.46374	0.220175	0.496937	0.0565875	292	0.0138659	0.484873	0.696328
Vacuolar protein sorting-associated protein 26A	VP26A	O75436	9559	VPS26A	19293-6	SL012994	0.379516	0.154158	2.46187	0.302149	0.681665	0.0773669	292	0.0138673	0.0849164	0.291404
Cyclic nucleotide-gated olfactory channel	CNGA2	Q16280		CNGA2	12872-35	SL019961	-0.30296	0.122922	-2.46464	0.240928	-0.0620317	-0.543887	292	0.0138769	0.440536	0.663729
Protein phosphatase 1D	PPM1D	O15297	8493	PPM1D	11315-148	SL013714	-0.317338	0.129044	-2.45914	0.252927	-0.064411	-0.570265	292	0.0138985	0.356726	0.597266
39S ribosomal protein L2, mitochondrial	RM02	Q5T653	51069	MRPL2	19132-1	SL015005	0.325283	0.132195	2.46063	0.259103	0.584386	0.0661804	292	0.0139108	0.32445	0.569605
Neutral and basic amino acid transport protein rBAT	SLC31	Q07837	6519	SLC3A1	9000-177	SL006521	0.247776	0.10054	2.46444	0.197059	0.444835	0.0507167	292	0.0139544	0.650218	0.806361
Trypsin-2	Trypsin 2	P07478	5645	PRSS2	5034-79	SL010388	-0.211878	0.0861108	-2.46053	0.168777	-0.043101	-0.380655	292	0.0139767	0.731601	0.855337
Complement C4	C4	P0C0L4, P0C0L5	720 721	C4A C4B	4481-34	SL000316	-0.230616	0.093257	-2.47291	0.182784	-0.0478327	-0.4134	292	0.0139867	0.683895	0.826979
Interleukin-15	IL-15	P40933	3600	IL15	19568-17	SL001775	0.336558	0.136797	2.46026	0.268123	0.604681	0.0684349	292	0.0139912	0.290387	0.538876
Lutropin subunit beta	LSHB	P01229	3972	LHB	8376-25	SL018465	-0.199653	0.0812111	-2.45845	0.159174	-0.0404798	-0.358827	292	0.014036	0.549825	0.741502
2'-deoxynucleoside 5'-phosphate N-hydrolase 1	RCL	O43598	10591	RCL	17785-11	SL008449	-0.332091	0.135057	-2.4589	0.264711	-0.0673798	-0.596803	292	0.0140439	0.157386	0.396719
Glycerophosphocholine phosphodiesterase GPCPD1	GDE5	Q9NPB8	56261	GPCPD1	12786-61	SL015257	0.363452	0.147945	2.45667	0.289971	0.653423	0.0734803	292	0.014091	0.179464	0.423632
Purine nucleoside phosphorylase	PNP	P00491	4860	PNP	15435-4	SL005262	0.38232	0.155717	2.45522	0.305206	0.687525	0.077114	292	0.0141533	0.107161	0.327355
Junctional adhesion molecule C	JAM-C	Q9BX67	83700	JAM3	2998-53	SL005194	0.38369	0.156338	2.45423	0.306423	0.690114	0.0772672	292	0.0141709	0.0987232	0.314203
Adenylosuccinate synthetase isozyme 2	PURA2	P30520		ADSS	12644-63	SL019828	0.26347	0.107123	2.45952	0.20996	0.47343	0.0535094	292	0.0142168	0.573841	0.757523
E3 SUMO-protein ligase PIAS3	PIAS3	Q9Y6X2		PIAS3	13513-174	SL020133	-0.269498	0.109862	-2.45306	0.215329	-0.054169	-0.484828	292	0.0142388	0.544287	0.737758
Endophilin-B1	SHLB1	Q9Y371	51100	SH3GLB1	16859-100	SL016527	0.279497	0.114018	2.45133	0.223476	0.502973	0.0560212	292	0.0142597	0.463546	0.680842
Follicular dendritic cell secreted peptide	FDSCP	Q8NFU4	260436	FDCSP	17346-61	SL012716	0.208427	0.0848507	2.45639	0.166307	0.374734	0.0421191	292	0.0142602	0.75631	0.869661
V-set and immunoglobulin domain-containing protein 1	VSIG1	Q86XK7	340547	VSIG1	8367-142	SL018491	0.33936	0.138448	2.45117	0.271359	0.610719	0.0680019	292	0.0142925	0.303215	0.55065
Inositol monophosphatase 1	IMPA1	P29218	3612	IMPA1	17796-15	SL009428	0.267242	0.108815	2.45592	0.213278	0.480519	0.0539639	292	0.0144323	0.542302	0.736411
Insulin-like peptide INSL6	INSL6	Q9Y581	11172	INSL6	5754-76	SL012879	-0.308352	0.125435	-2.45826	0.245853	-0.0624988	-0.554204	292	0.0144827	0.436634	0.660783
DnaJ homolog subfamily B member 1	HSP 40	P25685	3337	DNAJB1	3852-19	SL000449	0.372254	0.152161	2.44645	0.298235	0.670489	0.0740183	292	0.0145199	0.117923	0.3434
Transcription elongation factor A protein 1	TCEA1	P23193	6917	TCEA1	18204-1	SL013020	0.33498	0.136692	2.45063	0.267916	0.602896	0.0670647	292	0.01452	0.0842937	0.290334
cGMP-specific 3',5'-cyclic phosphodiesterase	PDE5A	O76074	8654	PDE5A	5256-86	SL011405	0.384916	0.157552	2.4431	0.308802	0.693719	0.0761138	292	0.0146556	0.0572929	0.239359
Inositol 1,4,5-trisphosphate receptor-interacting protein-like 1	IPIL1	Q6GPH6	150771	ITPRIPL1	9221-6	SL017093	0.36643	0.149766	2.44669	0.293541	0.65997	0.0728889	292	0.0146733	0.179955	0.424211
Microtubule-associated protein RP/EB family member 2	MARE2	Q15555	10982	MAPRE2	16856-79	SL007443	0.357445	0.146535	2.43932	0.287208	0.644653	0.0702374	292	0.0147769	0.141249	0.375831
STAM-binding protein	STABP	O95630	10617	STAMBP	19187-21	SL020523	0.379971	0.155843	2.43817	0.305453	0.685424	0.0745188	292	0.0147941	0.101364	0.318376
Tumor necrosis factor receptor superfamily member EDAR	EDAR	Q9UNE0	10913	EDAR	2977-7	SL004872	0.323803	0.132707	2.43998	0.260106	0.58391	0.0636966	292	0.0148008	0.350873	0.592345
Neuromedin-B	NMB	P08949	4828	NMB	9321-400	SL007093	0.240233	0.0982959	2.44398	0.19266	0.432893	0.0475734	292	0.0148061	0.405067	0.636448
Ephrin-B3	Ephrin-B3	Q15768	1949	EFNB3	7785-1	SL004142	-0.271598	0.111182	-2.44283	0.217916	-0.0536816	-0.489514	292	0.0148081	0.485868	0.697042
Acidic leucine-rich nuclear phosphoprotein 32 family member A	AN32A	P39687	8125	ANP32A	13073-14	SL019559	0.332508	0.136049	2.44404	0.266655	0.599163	0.0658526	292	0.0148192	0.272435	0.521953
Death-associated protein kinase 1	DAPK1	P53355	1612	DAPK1	13955-33	SL007277	0.360614	0.147659	2.44221	0.289412	0.650026	0.0712021	292	0.0148874	0.191588	0.437708
Uncharacterized family 31 glucosidase KIAA1161	K1161	Q6NSJ0	57462	KIAA1161	8068-43	SL018414	-0.265257	0.108862	-2.43663	0.21337	-0.0518874	-0.478627	292	0.0148927	0.58	0.761577
Charged multivesicular body protein 3	CHMP3	Q9Y3E7	51652	VPS24	12508-9	SL008756	0.355854	0.145974	2.43778	0.28611	0.641964	0.0697442	292	0.0148991	0.129095	0.359298
SH3 domain-binding glutamic acid-rich-like protein 3	SH3BGRL3-like protein	Q9H299	83442	SH3BGRL3	17490-4	SL004824	0.357234	0.146625	2.43637	0.287386	0.64462	0.0698481	292	0.0149598	0.135532	0.368147
Vasorin	VASN	Q6EMK4	114990	VASN	5682-13	SL006589	0.242849	0.0995591	2.43925	0.195136	0.437985	0.0477134	292	0.0150044	0.671294	0.819325
Protein unc-45 homolog A	UN45A	Q9H3U1	55898	UNC45A	13082-9	SL011294	0.3734	0.153686	2.42963	0.301224	0.674624	0.0721754	292	0.0151348	0.0906594	0.301097
Cyclin-dependent kinase 4 inhibitor D	p19-INK4d	P55273	1032	CDKN2D	12376-85	SL003762	0.362875	0.149276	2.43089	0.292582	0.655457	0.0702933	292	0.0151595	0.13618	0.369026
Serine-rich single-pass membrane protein 1	CG045	Q8WWF3	136263	SSMEM1	8298-8	SL018431	0.372285	0.15339	2.42704	0.300645	0.672931	0.07164	292	0.0151911	0.112979	0.336124
Cathepsin K	cathepsin K	P43235	1513	CTSK	9443-137	SL004059	0.223945	0.0919894	2.43447	0.180299	0.404245	0.0436462	292	0.0152134	0.665546	0.81581
Noelin-3	NOE3	Q96PB7	118427	OLFM3	11143-32	SL012572	-0.269076	0.110939	-2.42545	0.21744	-0.0516366	-0.486516	292	0.0153245	0.508793	0.713297
Junction plakoglobin	PLAK	P14923	3728	JUP	16768-3	SL006467	0.197307	0.0812536	2.42829	0.159257	0.356564	0.03805	292	0.0154147	0.755845	0.869394
MAP kinase-activated protein kinase 3	MAPKAPK3	Q16644	7867	MAPKAPK3	3822-54	SL004765	0.379635	0.156584	2.42448	0.306905	0.686539	0.0727301	292	0.0154376	0.0704008	0.265331
Inhibin beta C chain	INHBC	P55103	3626	INHBC	15686-49	SL007288	-0.135121	0.0556856	-2.4265	0.109144	-0.0259775	-0.244265	292	0.0154387	0.877898	0.936962
Tubulin-specific chaperone E	TBCE	Q15813		TBCE	11211-7	SL019355	0.36695	0.151292	2.42544	0.296532	0.663482	0.0704177	292	0.0154406	0.112112	0.334831
T-cell surface protein tactile	TACT	P40200	10225	CD96	9735-44	SL019066	0.308422	0.127025	2.42803	0.24897	0.557392	0.059452	292	0.0154905	0.338279	0.581617
WNT1-inducible-signaling pathway protein 1	WISP-1	O95388	8840	WISP1	3057-55	SL004689	-0.325291	0.134151	-2.42481	0.262936	-0.0623549	-0.588226	292	0.0154917	0.212288	0.460747
Regenerating islet-derived protein 4	REG4	Q9BYZ8	83998	REG4	11102-22	SL012561	-0.266516	0.110147	-2.41963	0.215888	-0.0506273	-0.482404	292	0.015501	0.486976	0.697836
AMMECR1-like protein	AMERL	Q6DCA0	83607	AMMECR1L	18402-1	SL021350	0.360227	0.148806	2.42078	0.29166	0.651886	0.0685667	292	0.0155286	0.197841	0.444793
Endoplasmic reticulum mannosyl-oligosaccharide 1,2-alpha-mannosidase	MA1B1	Q9UKM7	11253	MAN1B1	7071-23	SL017953	0.338034	0.139251	2.42751	0.272933	0.610967	0.0651014	292	0.0155344	0.328044	0.572751
Syndecan-3	SDC3	O75056	9672	SDC3	16612-28	SL020764	-0.284472	0.11751	-2.42084	0.230319	-0.0541533	-0.514791	292	0.0155894	0.49799	0.705684
Heparan-sulfate 6-O-sulfotransferase 2	H6ST2	Q96MM7		HS6ST2	13524-25	SL020161	0.326076	0.134595	2.42265	0.263806	0.589881	0.0622701	292	0.0156347	0.179973	0.424233
Stathmin-2	STMN2	Q93045	11075	STMN2	10900-272	SL013230	0.376236	0.155331	2.42215	0.304449	0.680685	0.0717868	292	0.0157043	0.138382	0.371998
PR domain zinc finger protein 4	PRDM4	Q9UKN5		PRDM4	12779-30	SL019909	0.338216	0.139866	2.41814	0.274137	0.612353	0.0640787	292	0.0157251	0.216935	0.465762
Ribose-5-phosphate isomerase	RPIA	P49247	22934	RPIA	12333-87	SL010958	0.321691	0.133024	2.4183	0.260727	0.582418	0.0609642	292	0.0157358	0.175929	0.419439
6-phosphogluconolactonase	6PGL	O95336	25796	PGLS	17799-9	SL005373	0.37509	0.15521	2.41667	0.304211	0.679301	0.0708791	292	0.0157441	0.111531	0.333963
Docking protein 1	DOK1	Q99704		DOK1	16831-7	SL019539	0.359319	0.148746	2.41565	0.291543	0.650862	0.0677766	292	0.0157469	0.159375	0.399218
Chitinase-3-like protein 2	CH3L2	Q15782	1117	CHI3L2	9383-24	SL012505	0.259881	0.107135	2.42573	0.209985	0.469865	0.049896	292	0.0157546	0.5544	0.74458
DnaJ homolog subfamily C member 10	DJC10	Q8IXB1	54431	DNAJC10	8297-8	SL018461	0.369761	0.153276	2.41239	0.300421	0.670182	0.0693401	292	0.0158653	0.106423	0.326225
6-phosphofructo-2-kinase/fructose-2,6-bisphosphatase 3	F263	Q16875		PFKFB3	12456-5	SL019744	0.334505	0.138437	2.41629	0.271337	0.605841	0.0631677	292	0.0159086	0.312209	0.558756
NADH-cytochrome b5 reductase 2	NB5R2	Q6BCY4	51700	CYB5R2	19143-38	SL013157	0.307901	0.127357	2.41763	0.249619	0.55752	0.0582821	292	0.015932	0.411006	0.641098
Tyrosine-protein kinase SYK	KSYK	P43405	6850	SYK	11378-37	SL007234	0.353018	0.1463	2.41297	0.286747	0.639765	0.0662701	292	0.0159434	0.0995432	0.315505
Phosphate-regulating neutral endopeptidase	PHEX	P78562	5251	PHEX	18921-30	SL007331	0.270196	0.111857	2.41555	0.219239	0.489435	0.0509568	292	0.0159535	0.555518	0.745331
Melanoma-associated antigen 10	MAGE-10	P43363	4109	MAGEA10	13610-9	SL005065	0.313875	0.130151	2.41162	0.255096	0.568971	0.0587793	292	0.0159697	0.338175	0.581529
BolA-like protein 1	BOLA1	Q9Y3E2	51027	BOLA1	15370-5	SL012877	0.356514	0.147906	2.4104	0.289897	0.64641	0.0666174	292	0.0159947	0.219991	0.469032
Growth/differentiation factor 11/8	GDF-11/8	O95390 O14793		GDF11 MSTN	2765-4	SL021043	0.237792	0.098922	2.40383	0.193887	0.431679	0.0439047	292	0.0160761	0.518691	0.720202
Retinoic acid early transcript 1G protein	RET1G	Q6H3X3	353091	RAET1G	18927-14	SL012569	0.292851	0.121593	2.40846	0.238322	0.531173	0.0545292	292	0.0161481	0.476978	0.690636
Protein phosphatase 1 regulatory subunit 3B	PPR3B	Q86XI6		PPP1R3B	12768-3	SL019887	0.160892	0.0668292	2.40752	0.130985	0.291878	0.0299072	292	0.0161903	0.834691	0.913614
Tetratricopeptide repeat protein 17	TTC17	Q96AE7	55761	TTC17	9550-153	SL018688	0.274768	0.114299	2.40394	0.224026	0.498794	0.0507414	292	0.0162363	0.562734	0.750156
Neutrophil cytosol factor 1	NCF-1	P14598	653361	NCF1	17766-5	SL004552	0.333347	0.138416	2.4083	0.271294	0.604641	0.0620524	292	0.016247	0.303686	0.551078
Polyglutamine-binding protein 1	PQBP1	O60828		PQBP1	11432-11	SL019453	-0.345328	0.143639	-2.40414	0.281532	-0.0637957	-0.62686	292	0.0162504	0.272252	0.521778
Indian hedgehog protein	ihh	Q14623	3549	IHH	19606-28	SL004084	-0.328549	0.136377	-2.40912	0.267299	-0.0612503	-0.595849	292	0.0162707	0.264917	0.514701
Uncharacterized protein C20orf173	CT173	Q96LM9	140873	C20orf173	7046-6	SL018041	0.282394	0.117512	2.40311	0.230323	0.512717	0.0520707	292	0.0162891	0.517505	0.719378
Receptor-binding cancer antigen expressed on SiSo cells	RCAS1	O00559	9166	EBAG9	19323-1	SL013709	0.271667	0.11306	2.40286	0.221598	0.493265	0.05007	292	0.0163372	0.551371	0.742544
nucleosome assembly protein 1-like 4	NAP2L	Q99733	4676	NAP1L4	19188-21	SL004715	0.366596	0.15267	2.40123	0.299234	0.66583	0.0673624	292	0.0163563	0.113291	0.336587
Heparan sulfate glucosamine 3-O-sulfotransferase 3A1	HS3SA	Q9Y663	9955	HS3ST3A1	8268-98	SL018442	0.373518	0.155635	2.39996	0.305044	0.678562	0.0684735	292	0.0164062	0.10335	0.321481
Myosin regulatory light chain 12A	MLRM	P19105	10627	MYL12A	19373-3	SL008053	0.368947	0.153764	2.39944	0.301377	0.670324	0.0675703	292	0.0164538	0.0985656	0.313952
Clathrin light chain A	CLCA	P09496	1211	CLTA	19257-11	SL010965	0.354493	0.147676	2.40048	0.289445	0.643939	0.0650478	292	0.0164757	0.152649	0.390703
Extracellular tyrosine-protein kinase PKDCC	PKDCC	Q504Y2	91461	PKDCC	8664-36	SL018607	-0.318986	0.133022	-2.398	0.260723	-0.058263	-0.579709	292	0.016489	0.386497	0.621689
Transcriptional activator protein Pur-alpha	PURA	Q00577	5813	PURA	12537-88	SL013811	0.376856	0.157045	2.39967	0.307808	0.684664	0.0690484	292	0.0165217	0.0847078	0.291046
3-keto-steroid reductase	DHB7	P56937	51478	HSD17B7	9929-16	SL018457	0.344569	0.143786	2.3964	0.28182	0.62639	0.0627489	292	0.0165911	0.18413	0.429104
Homeobox protein MOX-2	MEOX2	P50222	4223	MEOX2	18259-15	SL020979	0.296022	0.123229	2.40222	0.241528	0.53755	0.0544938	292	0.0166488	0.439883	0.663237
Calcyclin-binding protein	CYBP	Q9HB71	27101	CACYBP	12432-23	SL010232	0.369906	0.154434	2.39524	0.30269	0.672597	0.0672163	292	0.0166622	0.0833731	0.288744
Transcription elongation factor A protein-like 3	TCAL3	Q969E4	85012	TCEAL3	19112-2	SL013231	0.297113	0.124079	2.39456	0.243194	0.540308	0.0539194	292	0.0166626	0.452862	0.67295
Carbohydrate sulfotransferase 11	CHSTB	Q9NPF2	50515	CHST11	7779-86	SL018230	0.272985	0.113802	2.39877	0.223053	0.496038	0.0499325	292	0.0166794	0.476078	0.689984
Tumor necrosis factor receptor superfamily member 11B	OPG	O00300	4982	TNFRSF11B	8304-50	SL002539	-0.237212	0.0990638	-2.39454	0.194165	-0.0430467	-0.431377	292	0.0167142	0.61644	0.785137
Histone deacetylase 2	HDAC2	Q92769	3066	HDAC2	18897-31	SL007577	0.376561	0.157396	2.39245	0.308496	0.685057	0.0680655	292	0.0167848	0.0863761	0.293898
Chloride intracellular channel protein 4	CLIC4	Q9Y696	25932	CLIC4	15314-49	SL008340	0.347708	0.145429	2.39092	0.28504	0.632749	0.062668	292	0.0168279	0.169938	0.412235
Carbonic anhydrase 4	Carbonic Anhydrase IV	P22748	762	CA4	14069-61	SL010369	0.302779	0.126453	2.3944	0.247847	0.550626	0.0549314	292	0.016828	0.416361	0.64526
N-acetyltransferase 14	NAT14	Q8WUY8		NAT14	11120-49	SL019329	0.329118	0.137517	2.3933	0.269532	0.59865	0.0595855	292	0.0168659	0.189063	0.434814
Lithostathine-1-alpha	PSP	P05451	5967	REG1A	13095-51	SL005357	-0.246935	0.103332	-2.38974	0.20253	-0.0444055	-0.449465	292	0.0169228	0.583747	0.764034
					10467-58		0.223689	0.093402	2.39491	0.183068	0.406757	0.0406212	292	0.0169347	0.694545	0.833393
NKG2D ligand 3	ULBP-3	Q9BZM4	79465	ULBP3	2747-3	SL005229	0.365667	0.153243	2.38619	0.300357	0.666024	0.0653104	292	0.0170223	0.147601	0.384188
Transmembrane protein 2	TMEM2	Q9UHN6	23670	TMEM2	8992-1	SL018821	-0.211957	0.0886937	-2.38977	0.17384	-0.0381175	-0.385797	292	0.0170449	0.719382	0.848164
Importin subunit alpha-3	IMA4	O00629	3840	KPNA4	12698-72	SL006395	0.349178	0.146231	2.38785	0.286612	0.63579	0.0625654	292	0.0170516	0.21877	0.467729
Mitogen-activated protein kinase 8	MK08	P45983	5599	MAPK8	3825-18	SL010502	0.356152	0.149326	2.38506	0.292679	0.648831	0.0634732	292	0.0172095	0.147031	0.383446
Rho GTPase-activating protein 45	HMHA1	Q92619	23526	HMHA1	13544-9	SL011276	0.384971	0.161712	2.3806	0.316955	0.701926	0.068016	292	0.017335	0.0296029	0.172055
Carbohydrate sulfotransferase 15	ST4S6	Q7LFX5	51363	CHST15	4469-78	SL007502	0.220938	0.0928068	2.38062	0.181901	0.402839	0.0390368	292	0.01735	0.697319	0.835056
Heat shock 70 kDa protein 1A	HSP 70	P0DMV8	3303	HSPA1A	16780-6	SL000451	-0.276459	0.116348	-2.37613	0.228043	-0.0484163	-0.504502	292	0.0174616	0.514652	0.717392
Low affinity immunoglobulin gamma Fc region receptor III-A	FcRIIIa	P08637	2214	FCGR3A	15388-24	SL004561	-0.127232	0.0535125	-2.37761	0.104884	-0.0223476	-0.232117	292	0.0174639	0.894158	0.945599
Serine/arginine-rich splicing factor 7	SRSF7	Q16629		SRSF7	12987-12	SL019472	-0.320591	0.135103	-2.37294	0.264802	-0.0557894	-0.585393	292	0.0174695	0.335494	0.579219
					10665-30		0.288597	0.121172	2.38172	0.237497	0.526094	0.0511001	292	0.0174966	0.483794	0.695553
Persephin	Persephin	O60542	5623	PSPN	2696-87	SL004685	-0.193633	0.0812467	-2.38328	0.159244	-0.0343898	-0.352877	292	0.0175316	0.589981	0.768102
Obg-like ATPase 1	GTPB9	Q9NTK5	29789	OLA1	12659-13	SL008839	0.375901	0.158298	2.37465	0.310263	0.686165	0.065638	292	0.0175763	0.0749013	0.273681
	Deprecated				6036-78	SL014294	-0.271724	0.114426	-2.37467	0.224275	-0.0474495	-0.495999	292	0.0176872	0.51482	0.71751
Ribosome maturation protein SBDS	SBDS	Q9Y3A5	51119	SBDS	3866-7	SL011529	0.354258	0.149252	2.37355	0.292535	0.646793	0.0617237	292	0.0177197	0.123053	0.35079
Protein delta homolog 1	DLK1	P80370	8788	DLK1	6373-54	SL000679	-0.147679	0.0622736	-2.37146	0.122056	-0.025623	-0.269736	292	0.0177219	0.815738	0.903182
CUB and sushi domain-containing protein 2	CSMD2	Q7Z408	114784	CSMD2	9971-5	SL019222	0.3714	0.156671	2.37058	0.307074	0.678474	0.0643254	292	0.0177311	0.103931	0.322384
Thioredoxin-like protein 4B	TXN4B	Q9NX01		TXNL4B	15316-262	SL019950	0.354115	0.149277	2.3722	0.292583	0.646698	0.0615317	292	0.0177934	0.105713	0.325135
Lethal(3)malignant brain tumor-like protein 2	LMBL2	Q969R5		L3MBTL2	12708-91	SL019851	0.369964	0.156157	2.36919	0.306067	0.676031	0.0638971	292	0.0178591	0.0930964	0.305117
Rab9 effector protein with kelch motifs	RABEK	Q7Z6M1		RABEPK	13599-15	SL020211	0.270374	0.113823	2.3754	0.223092	0.493467	0.0472823	292	0.0178677	0.551244	0.742458
StAR-related lipid transfer protein 5	STAR5	Q9NSY2		STARD5	17383-4	SL019784	0.338982	0.14279	2.37398	0.279869	0.618851	0.0591127	292	0.0178879	0.25865	0.508576
Tyrosine-protein kinase receptor Tie-1, soluble	sTie-1	P35590	7075	TIE1	2844-53	SL003199	-0.163654	0.069086	-2.36884	0.135408	-0.0282454	-0.299062	292	0.0178986	0.821094	0.906142
Sulfiredoxin-1	SRXN1	Q9BYN0	140809	SRXN1	14268-4	SL007647	0.296428	0.1254	2.36385	0.245785	0.542213	0.0506435	292	0.0179369	0.388619	0.623393
Kinesin-like protein KIF23	KIF23	Q02241	9493	KIF23	5228-25	SL006189	0.366072	0.154757	2.36547	0.303323	0.669395	0.0627495	292	0.0180789	0.115959	0.340527
KIF1-binding protein	KBP	Q96EK5		KIAA1279	12956-40	SL019438	0.34964	0.147916	2.36378	0.289915	0.639555	0.0597257	292	0.018139	0.147844	0.384505
Phosphoglycerate mutase 2	PGAM2	P15259	5224	PGAM2	15524-30	SL008043	0.314802	0.133258	2.36235	0.261186	0.575988	0.0536165	292	0.0181619	0.00389899	0.0624419
Fibroblast growth factor 6	FGF-6	P10767	2251	FGF6	4130-71	SL004340	0.351645	0.149118	2.35817	0.292271	0.643916	0.0593739	292	0.0182986	0.192062	0.438249
Acid ceramidase	Acid ceramidase	Q13510	427	ASAH1	5748-20	SL005404	0.363383	0.153868	2.36166	0.301581	0.664964	0.0618025	292	0.0183019	0.115813	0.340313
Kelch-like protein 7	KLHL7	Q8IXQ5		KLHL7	12625-138	SL019811	0.282878	0.119891	2.35946	0.234986	0.517864	0.0478918	292	0.0183201	0.426848	0.653336
Interferon regulatory factor 6	IRF6	O14896	3664	IRF6	9999-1	SL019231	0.366497	0.155422	2.35808	0.304627	0.671124	0.0618707	292	0.0183258	0.0830231	0.288137
NmrA-like family domain-containing protein 1	NMRL1	Q9HBL8		NMRAL1	13988-67	SL020265	0.312281	0.132175	2.36263	0.259063	0.571344	0.0532171	292	0.0183701	0.335076	0.578858
Alpha-1-syntrophin	Alpha-1-syntrophin	Q13424	6640	SNTA1	19274-80	SL004593	0.357808	0.151754	2.35781	0.297439	0.655246	0.0603693	292	0.0183749	0.0996205	0.315627
Protein S100-A11	S100A11	P31949	6282	S100A11	14011-17	SL004809	0.241513	0.101998	2.36784	0.199915	0.441429	0.0415982	292	0.018385	0.624117	0.790011
Glutaredoxin-1	GLRX1	P35754	2745	GLRX	18386-36	SL008860	0.267578	0.113151	2.36478	0.221776	0.489354	0.0458016	292	0.0184172	0.561296	0.749197
Ephrin type-B receptor 1	EPHB1	P54762	2047	EPHB1	17680-12	SL016438	0.247274	0.104783	2.35987	0.205375	0.45265	0.0418993	292	0.0184402	0.606017	0.778471
Small glutamine-rich tetratricopeptide repeat-containing protein beta	SGTB	Q96EQ0	54557	SGTB	18837-9	SL021504	0.251093	0.106291	2.36231	0.208331	0.459424	0.0427623	292	0.0185287	0.590077	0.768165
Glucose-6-phosphate isomerase	PHI	P06744	2821	GPI	4272-46	SL000539	0.343196	0.145554	2.35785	0.285287	0.628483	0.057909	292	0.018539	0.16702	0.40868
Rap1 GTPase-GDP dissociation stimulator 1	GDP/GTP exchange protein	P52306	5910	RAP1GDS1	14106-46	SL003682	0.347342	0.147547	2.35411	0.289192	0.636533	0.0581503	292	0.0186197	0.157322	0.396638
Pappalysin-2	PAPP2	Q9BXP8	60676	PAPPA2	5756-66	SL008518	-0.313504	0.133123	-2.355	0.260921	-0.052583	-0.574424	292	0.01863	0.317208	0.563213
Sorting nexin-4	Sorting nexin 4	O95219	8723	SNX4	3903-49	SL005372	0.350302	0.148859	2.35325	0.291764	0.642066	0.0585383	292	0.0186888	0.133463	0.365326
Sialic acid-binding Ig-like lectin 6	Siglec-6	O43699	946	SIGLEC6	2741-22	SL005217	-0.195178	0.0828706	-2.35521	0.162426	-0.0327517	-0.357605	292	0.0187729	0.758626	0.870991
Cadherin-6	Cadherin-6	P55285	1004	CDH6	16312-45	SL004865	-0.3094	0.131651	-2.35016	0.258036	-0.0513643	-0.567436	292	0.018839	0.359857	0.599881
Histone H3.1	H31	P68431	8350	HIST1H3A	14146-92	SL008158	0.272327	0.115973	2.3482	0.227307	0.499634	0.0450205	292	0.018851	0.363671	0.603052
Leukosialin	LEUK	P16150	6693	SPN	12873-11	SL007131	0.270382	0.114904	2.35311	0.225212	0.495595	0.0451702	292	0.0188561	0.53197	0.729363
Protein 4.1	41	P11171	2035	EPB41	4706-17	SL010830	0.349379	0.1488	2.34797	0.291649	0.641028	0.0577304	292	0.0188773	0.106056	0.325663
Protein FAM3D	FAM3D	Q96BQ1	131177	FAM3D	13102-1	SL012769	-0.167379	0.0712892	-2.34788	0.139727	-0.0276519	-0.307105	292	0.0189226	0.793737	0.890919
Ubiquitin-conjugating enzyme E2 variant 1	UB2V1	Q13404	387522	UBE2V1	11626-7	SL008563	0.370421	0.157833	2.34692	0.309353	0.679774	0.0610683	292	0.0190241	0.0917624	0.302923
Pyruvate kinase PKLR	KPYR	P30613	5313	PKLR	15607-56	SL009203	-0.268754	0.114664	-2.34384	0.224741	-0.0440129	-0.493495	292	0.0190805	0.222655	0.471863
Oncoprotein-induced transcript 3 protein	OIT3	Q8WWZ8	170392	OIT3	6296-36	SL017395	-0.295847	0.126137	-2.34544	0.247229	-0.0486184	-0.543076	292	0.0191592	0.415715	0.644759
3'(2'),5'-bisphosphate nucleotidase 1	BPNT1	O95861	10380	BPNT1	17814-8	SL009020	0.358395	0.152955	2.34314	0.299792	0.658188	0.0586028	292	0.0192592	0.087851	0.296397
Brorin	VWC2	Q2TAL6	375567	VWC2	15308-108	SL012520	0.255896	0.109099	2.34552	0.213835	0.46973	0.0420606	292	0.019285	0.437881	0.661726
1-phosphatidylinositol 4,5-bisphosphate phosphodiesterase gamma-1	PLCG1	P19174	5335	PLCG1	4563-61	SL012108	-0.29099	0.124428	-2.33861	0.243879	-0.0471102	-0.534869	292	0.0193103	0.390169	0.624635
Transgelin-2	Transgelin-2	P37802	8407	TAGLN2	9201-13	SL004811	0.319537	0.136778	2.33618	0.268084	0.587622	0.0514529	292	0.019443	0.148824	0.385777
Ras-related C3 botulinum toxin substrate 1	RAC1	P63000	5879	RAC1	2870-29	SL004009	0.354242	0.151635	2.33616	0.297204	0.651446	0.0570382	292	0.0194742	0.11621	0.340895
					10494-48		0.256546	0.109809	2.33629	0.215226	0.471773	0.04132	292	0.0195165	0.58578	0.765362
Serine/threonine-protein kinase PAK 4	PAK4	O96013		PAK4	13719-19	SL020219	0.357576	0.153178	2.33439	0.300228	0.657805	0.057348	292	0.0196026	0.0990158	0.314668
Coagulation factor VII	Coagulation Factor VII	P08709	2155	F7	3184-25	SL000358	-0.189085	0.0810028	-2.3343	0.158766	-0.0303195	-0.347851	292	0.0196402	0.725882	0.851987
Colipase-like protein 2	CF126	Q6UWE3	389383	CLPSL2	7767-1	SL012589	-0.298752	0.12801	-2.33381	0.2509	-0.0478518	-0.549651	292	0.0196498	0.294222	0.542423
ETS domain-containing protein Elk-3	ELK3	P41970	2004	ELK3	5707-55	SL013780	0.357873	0.153295	2.33453	0.300459	0.658332	0.0574144	292	0.0196922	0.120794	0.347555
Alpha-soluble NSF attachment protein	SNAA	P54920	8775	NAPA	4292-5	SL011202	0.368938	0.158232	2.33162	0.310136	0.679073	0.0588021	292	0.0197091	0.0683284	0.261397
E3 ubiquitin-protein ligase RNF43	RNF43	Q68DV7	54894	RNF43	14120-2	SL018629	0.256789	0.109765	2.33945	0.215139	0.471928	0.04165	292	0.0197342	0.588166	0.76692
Ubiquitin-like protein 4A	UBL4A	P11441		UBL4A	11490-42	SL019457	0.3652	0.156659	2.33118	0.307051	0.672251	0.0581488	292	0.0197434	0.0623489	0.249698
alpha-Fetoprotein	AFP	P02771	174	AFP	5792-8	SL000011	0.292467	0.125423	2.33184	0.24583	0.538297	0.0466373	292	0.0197496	0.427309	0.653689
Leucine-rich repeat transmembrane neuronal protein 4	LRRT4	Q86VH4	80059	LRRTM4	8646-61	SL017483	-0.277673	0.119228	-2.32892	0.233687	-0.0439862	-0.51136	292	0.0198163	0.500485	0.70745
Histatin-1	HIS1	P15515	3346	HTN1	10608-9	SL012418	0.199529	0.0855585	2.33208	0.167695	0.367224	0.0318347	292	0.0199864	0.704321	0.839238
Uromodulin-like 1	UROL1	Q5DID0	89766	UMODL1	9114-84	SL018788	-0.223433	0.0962349	-2.32174	0.18862	-0.0348123	-0.412053	292	0.0203343	0.53521	0.73158
Mitogen-activated protein kinase 9	JNK2	P45984	5601	MAPK9	15604-18	SL004716	0.346299	0.149434	2.31741	0.29289	0.639189	0.0534085	292	0.0204643	0.157215	0.396503
ATP-dependent RNA helicase DDX19B	DEAD-box protein 19B	Q9UMR2	11269	DDX19B	5460-60	SL004750	0.34303	0.147799	2.32092	0.289687	0.632717	0.0533432	292	0.0205585	0.118695	0.344521
Heterogeneous nuclear ribonucleoprotein D-like	HNRDL	O14979	9987	HNRNPDL	10852-114	SL012987	0.359843	0.155422	2.31526	0.304627	0.66447	0.0552155	292	0.0207057	0.029672	0.172256
Pancreatic hormone	PH	P01298	5539	PPY	4588-1	SL011499	-0.211788	0.0915303	-2.31385	0.179399	-0.0323882	-0.391187	292	0.0207178	0.646786	0.80423
tRNA pseudouridine synthase A, mitochondrial	TRUA	Q9Y606		PUS1	11201-19	SL019343	0.326201	0.140982	2.31378	0.276325	0.602525	0.049876	292	0.020722	0.226758	0.476191
Ubiquitin-conjugating enzyme E2 L3	UB2L3	P68036	7332	UBE2L3	3874-8	SL008157	0.364545	0.157711	2.31147	0.309114	0.673659	0.0554314	292	0.0207927	0.0873064	0.295477
Collagen alpha-2(VI) chain	CO6A2	P12110	1292	COL6A2	16753-46	SL007942	-0.233221	0.100913	-2.31111	0.197789	-0.0354319	-0.431009	292	0.0208042	0.614046	0.783611
Beta-soluble NSF attachment protein	SNAB	Q9H115	63908	NAPB	12655-30	SL010994	0.27558	0.119194	2.31202	0.233621	0.509201	0.041959	292	0.0208248	0.518668	0.720186
cGMP-inhibited 3',5'-cyclic phosphodiesterase A	PDE3A	Q14432	5139	PDE3A	5254-69	SL016553	0.278077	0.120564	2.30646	0.236306	0.514383	0.0417704	292	0.0208361	0.489064	0.699331
Methionine aminopeptidase 1	METAP1	P53582	23173	METAP1	3210-1	SL010374	0.370038	0.160197	2.3099	0.313986	0.684023	0.0560522	292	0.0208907	0.0474757	0.217889
Olfactomedin-like protein 1	OLFL1	Q6UWY5	283298	OLFML1	8815-1	SL012603	0.251737	0.10886	2.31249	0.213366	0.465103	0.0383715	292	0.0209939	0.560464	0.748642
Killer cell immunoglobulin-like receptor 2DS2	KI2S2	P43631	100132285	KIR2DS2	10428-1	SL018045	0.133966	0.0578592	2.31537	0.113404	0.24737	0.0205615	292	0.0209968	0.86276	0.928849
Peroxisome proliferator-activated receptor gamma coactivator 1-alpha	PRGC1	Q9UBK2	10891	PPARGC1A	11825-27	SL013877	-0.262703	0.113712	-2.31025	0.222876	-0.0398279	-0.485579	292	0.0210525	0.43917	0.662699
Dual specificity mitogen-activated protein kinase kinase 3	MP2K3	P46734	5606	MAP2K3	6151-18	SL007242	0.355313	0.154121	2.30542	0.302077	0.65739	0.0532362	292	0.0210609	0.136366	0.369277
Heat shock 70 kDa protein 1-like	HS71L	P34931	3305	HSPA1L	12041-33	SL013773	0.263059	0.113785	2.31189	0.223019	0.486077	0.0400398	292	0.02108	0.540721	0.735337
Cerebral cavernous malformations 2 protein	CCM2	Q9BSQ5		CCM2	12347-29	SL019675	0.344845	0.149432	2.30771	0.292886	0.637732	0.0519591	292	0.0211095	0.167512	0.409282
Melanoregulin	MREG	Q8N565	55686	MREG	19145-4	SL015073	-0.215313	0.0933287	-2.30704	0.182924	-0.0323886	-0.398237	292	0.0211345	0.63161	0.794739
Tax1-binding protein 3	TX1B3	O14907		TAX1BP3	12498-12	SL019719	0.34137	0.148018	2.30627	0.290116	0.631486	0.0512546	292	0.0211981	0.15608	0.395069
Eukaryotic translation initiation factor 5	eIF-5	P55010	1983	EIF5	2612-5	SL004759	0.362708	0.156963	2.31079	0.307647	0.670355	0.0550613	292	0.0212337	0.12012	0.346583
Gamma-aminobutyric acid receptor-associated protein-like 2	GBRL2	P60520		GABARAPL2	12494-99	SL019741	0.35544	0.154343	2.30291	0.302513	0.657953	0.0529264	292	0.0213037	0.104692	0.323562
Complement factor H	Factor H	P08603	3075	CFH	4159-130	SL000415	-0.278797	0.120948	-2.30509	0.237059	-0.0417384	-0.515856	292	0.0213349	0.465973	0.682622
C-C motif chemokine 18	PARC	P55774	6362	CCL18	3044-3	SL003323	-0.186149	0.0808985	-2.30102	0.158561	-0.0275877	-0.34471	292	0.021346	0.768377	0.876571
Beclin-1	BECN1	Q14457	8678	BECN1	13032-1	SL014943	0.256991	0.111597	2.30285	0.21873	0.475722	0.0382609	292	0.0213668	0.574124	0.75771
TNF receptor-associated factor 4	TRAF4	Q9BUZ4	9618	TRAF4	13041-47	SL007634	0.253597	0.110359	2.29793	0.216303	0.469901	0.0372937	292	0.0213997	0.57916	0.761026
Protein S100-A5	S100A5	P33763	6276	S100A5	15303-63	SL004826	0.324279	0.140756	2.30384	0.275881	0.60016	0.0483977	292	0.0214028	0.180009	0.424275
Alpha-(1,3)-fucosyltransferase 10	FUT10	Q6P4F1	84750	FUT10	7156-2	SL018125	0.243119	0.105728	2.29947	0.207227	0.450346	0.0358918	292	0.021512	0.58286	0.763453
DnaJ homolog subfamily B member 4	DNJB4	Q9UDY4	11080	DNAJB4	18884-22	SL021230	0.351287	0.152675	2.30088	0.299243	0.65053	0.0520438	292	0.0215234	0.0580503	0.240936
Deoxynucleoside triphosphate triphosphohydrolase SAMHD1	SAMH1	Q9Y3Z3	25939	SAMHD1	11303-7	SL008335	0.251061	0.109086	2.3015	0.213808	0.46487	0.0372532	292	0.0216116	0.609759	0.78087
Microtubule-associated protein RP/EB family member 1	MARE1	Q15691	22919	MAPRE1	12469-19	SL011230	0.343614	0.149637	2.29632	0.293288	0.636902	0.0503257	292	0.021617	0.122053	0.349361
Alkaline phosphatase, placental type	Alkaline phosphatase, placental	P05187	250	ALPP	7813-6	SL000256	0.220997	0.096229	2.29658	0.188609	0.409606	0.0323886	292	0.0216779	0.687665	0.829255
Talin-2	TLN2	Q9Y4G6	83660	TLN2	14082-56	SL016540	0.335309	0.146128	2.29462	0.286412	0.621721	0.048897	292	0.0217337	0.15054	0.387995
MHC class I polypeptide-related sequence A	MICA	Q29983	4276	MICA	2730-58	SL005199	-0.165058	0.0719014	-2.29561	0.140927	-0.0241309	-0.305985	292	0.0218466	0.833809	0.913131
Keratin, type I cytoskeletal 18	Keratin 18	P05783	3875	KRT18	5354-11	SL000655	0.295338	0.128832	2.29243	0.25251	0.547848	0.0428273	292	0.0218873	0.401381	0.633546
Interleukin enhancer-binding factor 3	DRBP76	Q12906	3609	ILF3	12759-47	SL004792	-0.26686	0.116343	-2.29373	0.228032	-0.0388274	-0.494892	292	0.0219063	0.484866	0.696323
Regulation of nuclear pre-mRNA domain-containing protein 1A	RPR1A	Q96P16		RPRD1A	13515-8	SL020146	-0.245525	0.107082	-2.29286	0.209882	-0.035643	-0.455406	292	0.021935	0.575863	0.758857
Glycolipid transfer protein	GLTP	Q9NZD2	51228	GLTP	12513-8	SL008826	0.252002	0.110064	2.28959	0.215726	0.467728	0.0362762	292	0.0220501	0.560644	0.748762
Retinoblastoma-associated protein	Rb	P06400	5925	RB1	5024-67	SL002522	-0.301445	0.131655	-2.28965	0.258045	-0.0434006	-0.55949	292	0.0220556	0.324077	0.569278
C4b-binding protein alpha chain	C4b-binding protein alpha chain	P04003	722	C4BPA	9449-150	SL015989	-0.218792	0.0956667	-2.28702	0.187507	-0.0312848	-0.406298	292	0.0220812	0.632407	0.79524
Dual specificity protein phosphatase 4	DUS4	Q13115	1846	DUSP4	10035-6	SL007389	-0.258507	0.112933	-2.28903	0.221348	-0.0371588	-0.479855	292	0.0220831	0.517044	0.719058
Immunoglobulin alpha Fc receptor	FCAR	P24071	2204	FCAR	4987-17	SL010373	-0.310481	0.135538	-2.29073	0.265654	-0.0448262	-0.576135	292	0.0221244	0.365897	0.604894
AMP Kinase (alpha2beta2gamma1)	AMPK a2b2g1	P54646 O43741 P54619	5563 5565 5571	PRKAA2 PRKAB2 PRKAG1	5245-40	SL016549	0.358534	0.156794	2.28665	0.307317	0.665851	0.0512173	292	0.0221465	0.071877	0.268099
Sulfotransferase 1A3	SULT 1A3	P0DMM9	445329	SULT1A3	13944-3	SL000578	0.349279	0.152781	2.28615	0.29945	0.648729	0.0498289	292	0.0222248	0.127307	0.356801
Creatine kinase S-type, mitochondrial	KCRS	P17540	1160	CKMT2	18197-97	SL008050	0.243851	0.106651	2.28644	0.209035	0.452887	0.0348156	292	0.0222738	0.607233	0.779252
Interleukin-17 receptor B	IL-17B R	Q9NRM6	55540	IL17RB	6262-14	SL005174	0.349559	0.15288	2.2865	0.299644	0.649203	0.0499147	292	0.0223505	0.123796	0.351847
Haloacid dehalogenase-like hydrolase domain-containing protein 3	HDHD3	Q9BSH5	81932	HDHD3	19482-11	SL015184	0.337069	0.147727	2.2817	0.289545	0.626614	0.0475243	292	0.022368	0.188798	0.434509
Transforming protein RhoA	Rho A	P61586	387	RHOA	9855-10	SL000567	0.342763	0.150151	2.2828	0.294295	0.637059	0.0484681	292	0.0224053	0.13044	0.361164
Metaxin-2	Metaxin-2	O75431	10651	MTX2	8839-4	SL005289	-0.257243	0.112711	-2.28233	0.220913	-0.0363303	-0.478156	292	0.0224079	0.421092	0.648916
LanC-like protein 1	LANC1	O43813	10314	LANCL1	13986-6	SL010800	0.332863	0.145868	2.28195	0.285901	0.618764	0.0469623	292	0.0225561	0.181193	0.425668
Regulator of G-protein signaling 3	RGS3	P49796	5998	RGS3	12827-37	SL014817	-0.263739	0.115645	-2.28059	0.226665	-0.0370747	-0.490404	292	0.0226072	0.444245	0.666517
Inhibitor of growth protein 1	ING1	Q9UK53	3621	ING1	3888-8	SL009628	0.35286	0.154867	2.27847	0.303539	0.656399	0.049321	292	0.0226674	0.0992747	0.315079
Ubiquitin recognition factor in ER-associated degradation protein 1	UFD1	Q92890	7353	UFD1L	17411-55	SL015528	0.34555	0.151578	2.27969	0.297092	0.642642	0.0484576	292	0.0226833	0.110866	0.332966
Complement C5	C5	P01031	727	C5	2381-52	SL000319	-0.236009	0.103488	-2.28055	0.202836	-0.0331731	-0.438845	292	0.022692	0.605186	0.777937
Ras-related protein Rab-27A	RB27A	P51159	5873	RAB27A	9504-19	SL008535	-0.237117	0.104239	-2.27475	0.204308	-0.0328089	-0.441425	292	0.0227362	0.486904	0.697785
Serine/threonine-protein kinase A-Raf	ARAF	P10398	369	ARAF	12583-77	SL019755	0.315882	0.138695	2.27753	0.271842	0.587724	0.0440404	292	0.0227595	0.258877	0.5088
Folate receptor gamma	FOLR3	P41439	2352	FOLR3	15495-9	SL012435	0.173143	0.0759817	2.27875	0.148924	0.322067	0.024219	292	0.0228768	0.743255	0.862123
Ras GTPase-activating protein 1	RASA1	P20936	5921	RASA1	5481-16	SL013754	0.309178	0.135964	2.27398	0.266488	0.575667	0.0426898	292	0.0229765	0.286415	0.535177
General vesicular transport factor p115	USO1	O60763	8615	USO1	13639-101	SL016380	0.353821	0.155524	2.27502	0.304827	0.658649	0.0489937	292	0.0230229	0.0549341	0.23438
Protein kinase C and casein kinase substrate in neurons protein 1	PACN1	Q9BY11		PACSIN1	12676-1	SL019835	0.339133	0.149136	2.27398	0.292306	0.631439	0.0468264	292	0.0230267	0.147167	0.383624
Protein kinase C alpha type	PKC-A	P17252	5578	PRKCA	2644-11	SL000551	0.342195	0.150648	2.27149	0.29527	0.637465	0.0469255	292	0.0232053	0.114302	0.338085
SH3 domain-binding glutamic acid-rich-like protein 2	SH3L2	Q9UJC5	83699	SH3BGRL2	19113-66	SL009024	0.332412	0.146468	2.26952	0.287077	0.619489	0.0453348	292	0.0232131	0.137357	0.370617
Chromobox protein homolog 7	CBX7	O95931		CBX7	13027-20	SL019531	-0.303038	0.133264	-2.27396	0.261198	-0.0418399	-0.564236	292	0.023221	0.370052	0.608319
ERO1-like protein alpha	ERO1A	Q96HE7	30001	ERO1L	7060-2	SL009007	0.308092	0.135685	2.27064	0.265943	0.574035	0.0421491	292	0.0232344	0.336764	0.580314
Microfibril-associated glycoprotein 4	MFAP4	P55083	4239	MFAP4	5636-10	SL002084	-0.188074	0.0827631	-2.27244	0.162216	-0.0258582	-0.35029	292	0.0233416	0.758251	0.870776
Ras-related C3 botulinum toxin substrate 3	RAC3	P60763	5881	RAC3	16769-20	SL007310	0.338725	0.149514	2.26551	0.293047	0.631772	0.045678	292	0.0234699	0.128747	0.358813
Glioma pathogenesis-related protein 1	GLIP1	P48060	11010	GLIPR1	9265-10	SL017117	0.282044	0.124628	2.26309	0.24427	0.526314	0.0377735	292	0.0236634	0.44933	0.67032
Neuroligin-1	NLGN1	Q8N2Q7	22871	NLGN1	15620-4	SL018410	0.256575	0.113271	2.26515	0.222011	0.478586	0.0345649	292	0.0237573	0.461216	0.679129
Tomoregulin-1	TEFF1	Q8IYR6	8577	TMEFF1	15641-20	SL020463	0.312075	0.138107	2.25966	0.27069	0.582764	0.041385	292	0.0238124	0.218544	0.467487
Ras-related protein Rab-3C	RAB3C	Q96E17	115827	RAB3C	19586-89	SL011389	0.348068	0.154073	2.25911	0.301983	0.650052	0.046085	292	0.0239136	0.0967339	0.311021
Protein kinase C and casein kinase substrate in neurons protein 3	PACN3	Q9UKS6		PACSIN3	14674-63	SL020191	0.265267	0.117546	2.2567	0.230391	0.495658	0.0348759	292	0.023941	0.503209	0.709372
Hepatocyte growth factor-like protein	MSP	P26927	4485	MST1	4407-10	SL005202	-0.101973	0.0451614	-2.25796	0.0885164	-0.0134561	-0.190489	292	0.0239413	0.89596	0.946552
Protein enabled homolog	ENAH	Q8N8S7	55740	ENAH	9757-29	SL019147	0.343417	0.152063	2.25838	0.298044	0.64146	0.0453731	292	0.0239417	0.110883	0.33299
Transmembrane protein 8B	TMM8B	A6NDV4		TMEM8B	12742-160	SL019870	0.222429	0.0983177	2.26235	0.192703	0.415132	0.0297261	292	0.0239492	0.635708	0.797313
Dynein light chain 2, cytoplasmic	DYL2	Q96FJ2		DYNLL2	11493-169	SL019474	0.352569	0.156234	2.25668	0.306218	0.658787	0.0463508	292	0.0239987	0.0974992	0.312249
5-hydroxytryptamine receptor 6	5HT6R	P50406	3362	HTR6	13561-5	SL020176	-0.232831	0.103261	-2.25479	0.202391	-0.0304397	-0.435222	292	0.0240756	0.467946	0.684066
Glyoxylate reductase/hydroxypyruvate reductase	GRHPR	Q9UBQ7	9380	GRHPR	18295-102	SL008323	0.316175	0.140111	2.25661	0.274617	0.590792	0.041558	292	0.0241046	0.273477	0.52295
Leucine-rich repeat-containing protein 52	LRC52	Q8N7C0	440699	LRRC52	10785-8	SL018337	0.186896	0.0826075	2.26246	0.161911	0.348807	0.0249853	292	0.024238	0.754841	0.868816
Macrophage-capping protein	CAPG	P40121	822	CAPG	4968-50	SL008099	0.268498	0.118674	2.26248	0.232601	0.501099	0.0358968	292	0.0244122	0.455178	0.674669
B-cell antigen receptor complex-associated protein alpha chain	CD79A	P11912	973	CD79A	7796-10	SL011613	0.283304	0.12578	2.25238	0.246529	0.529833	0.0367755	292	0.0244189	0.356629	0.597184
Proteasome activator complex subunit 1	PSME1	Q06323	5720	PSME1	5918-5	SL008176	0.350443	0.155713	2.25056	0.305198	0.655641	0.0452446	292	0.0244578	0.124906	0.35342
					7802-53		-0.202116	0.0898159	-2.25034	0.176039	-0.0260771	-0.378155	292	0.02451	0.674872	0.821506
Protrudin	ZFY27	Q5T4F4	118813	ZFYVE27	9102-28	SL018817	0.30571	0.135926	2.24909	0.266415	0.572125	0.0392952	292	0.0245421	0.266038	0.515788
Chloride intracellular channel protein 5	CLIC5	Q9NZA1		CLIC5	12475-48	SL019722	-0.244422	0.108842	-2.24567	0.21333	-0.0310927	-0.457752	292	0.024579	0.418246	0.64672
Stathmin-4	STMN4	Q9H169	81551	STMN4	6267-51	SL013269	-0.325935	0.144702	-2.25246	0.283616	-0.0423192	-0.609551	292	0.0245908	0.185276	0.430437
CD40 ligand	CD40 ligand, soluble	P29965	959	CD40LG	3534-14	SL003862	0.302929	0.134758	2.24794	0.264126	0.567055	0.0388023	292	0.0246418	0.347124	0.589173
E3 ubiquitin-protein ligase CHIP	CHIP	Q9UNE7	10273	STUB1	10336-3	SL019100	0.314498	0.14023	2.24273	0.274851	0.589349	0.0396473	292	0.0246799	0.242159	0.492097
Myeloperoxidase	Myeloperoxidase	P05164	4353	MPO	2580-83	SL001796	-0.203769	0.0906099	-2.24886	0.177595	-0.0261736	-0.381364	292	0.0246863	0.737241	0.858627
Ig gamma-4, Kappa	IgG4, Kappa	P01861		IGHG4	13231-90	SL020001	0.279384	0.124639	2.24153	0.244293	0.523677	0.0350902	292	0.0247527	0.416441	0.645323
Rho-associated protein kinase 2	ROCK2	O75116	9475	ROCK2	13654-1	SL005370	0.326637	0.145488	2.24511	0.285156	0.611793	0.0414806	292	0.0247906	0.125738	0.354595
Cadherin-3	P-Cadherin	P22223	1001	CDH3	2643-57	SL004183	-0.259696	0.115602	-2.24646	0.22658	-0.0331158	-0.486277	292	0.0248298	0.45126	0.671759
WAP four-disulfide core domain protein 3	WFDC3	Q8IUB2	140686	WFDC3	6384-19	SL012661	0.339861	0.151407	2.24469	0.296757	0.636618	0.0431045	292	0.0248752	0.135029	0.367463
Transmembrane protease serine 6	TMPS6	Q8IU80		TMPRSS6	11239-49	SL019365	-0.201632	0.0898767	-2.24343	0.176158	-0.0254741	-0.377791	292	0.024929	0.713714	0.844816
Proteasome subunit beta type-6	PSB6	P28072	5694	PSMB6	10530-8	SL016414	0.25437	0.113345	2.24421	0.222156	0.476526	0.0322139	292	0.0249515	0.409163	0.639659
HCE001796	HCE001796	HCE001796	HCE001796	HCE001796	2171-12	HCE001796	0.373258	0.167169	2.23282	0.327651	0.700909	0.0456074	292	0.0250937	0	0
Pregnancy-specific beta-1-glycoprotein 8	PSG8	Q9UQ74	440533	PSG8	6238-55	SL012873	0.273042	0.121841	2.24097	0.238809	0.511851	0.0342333	292	0.0251624	0.47451	0.688847
Stromal membrane-associated protein 1	SMAP1	Q8IYB5		SMAP1	11649-3	SL019547	0.334496	0.14937	2.23938	0.292765	0.627261	0.0417305	292	0.0251638	0.145819	0.381862
					8031-11		0.145434	0.0649873	2.23788	0.127375	0.272809	0.0180588	292	0.0252548	0.847614	0.920659
Toll/interleukin-1 receptor domain-containing adapter protein	Tirap	P58753	114609	TIRAP	9839-148	SL004506	0.328492	0.146668	2.23969	0.28747	0.615962	0.0410214	292	0.0252935	0.172811	0.415705
Protein S100-A12	S100A12	P80511	6283	S100A12	5852-6	SL004783	0.307101	0.136734	2.24598	0.267998	0.575099	0.0391031	292	0.0253189	0.296403	0.544429
Rab GDP dissociation inhibitor beta	Rab GDP dissociation inhibitor beta	P50395	2665	GDI2	2647-66	SL003648	0.349609	0.156314	2.23659	0.306375	0.655984	0.0432346	292	0.0253243	0.0971409	0.311674
Ubiquitin-conjugating enzyme E2 E1	UB2E1	P51965	7324	UBE2E1	14326-4	SL006253	0.350039	0.156391	2.23823	0.306527	0.656567	0.0435122	292	0.0253257	0.0986632	0.314107
Fas apoptotic inhibitory molecule 3	FAIM3	O60667	9214	FAIM3	6574-11	SL008605	0.117943	0.0526242	2.24124	0.103143	0.221087	0.0148	292	0.0253443	0.928021	0.963338
Phosphoglycerate kinase 1	phosphoglycerate kinase 1	P00558	5230	PGK1	5020-50	SL003653	0.339872	0.152088	2.23471	0.298093	0.637965	0.0417798	292	0.0253454	0.130926	0.361837
cAMP-specific 3',5'-cyclic phosphodiesterase 4D	PDE4D	Q08499	5144	PDE4D	5255-22	SL011404	0.289056	0.129263	2.23618	0.253356	0.542411	0.0357004	292	0.0254303	0.380671	0.616986
					6967-5		-0.254927	0.114061	-2.23501	0.22356	-0.0313675	-0.478487	292	0.0254404	0.538804	0.734033
Opticin	OPT	Q9UBM4	26254	OPTC	15430-165	SL012859	-0.297562	0.133266	-2.23283	0.261202	-0.0363595	-0.558764	292	0.0254887	0.301314	0.548921
					11939-11		0.186061	0.083314	2.23325	0.163295	0.349357	0.0227659	292	0.0255203	0.758928	0.871165
High affinity immunoglobulin alpha and immunoglobulin mu Fc receptor	FCAMR	Q8WWV6	83953	FCAMR	9568-289	SL012746	0.28143	0.126057	2.23255	0.247073	0.528503	0.0343576	292	0.0255454	0.41132	0.641342
Serine protease inhibitor Kazal-type 9	ISK9	Q5DT21	643394	SPINK9	8042-88	SL018399	0.243339	0.108543	2.24187	0.212743	0.456082	0.0305952	292	0.0256486	0.570871	0.75556
Probable tRNA(His) guanylyltransferase	THG1	Q9NWX6	54974	THG1L	18215-5	SL021098	0.272075	0.12188	2.23232	0.238885	0.51096	0.0331902	292	0.0256756	0.154203	0.392687
Short/branched chain specific acyl-CoA dehydrogenase, mitochondrial	acyl-Coenzyme A dehydrogenase	P45954	36	ACADSB	17403-14	SL006190	0.299437	0.134378	2.22832	0.263381	0.562818	0.0360557	292	0.0257454	0.297643	0.545567
Enhancer of mRNA-decapping protein 4	EDC4	Q6P2E9	23644	EDC4	13066-42	SL015023	0.293785	0.131988	2.22585	0.258696	0.552481	0.0350893	292	0.0258756	0.343213	0.585844
7,8-dihydro-8-oxoguanine triphosphatase	8ODP	P36639	4521	NUDT1	19206-20	SL007213	0.257305	0.115505	2.22766	0.22639	0.483695	0.0309155	292	0.0261455	0.484466	0.696036
LysM and putative peptidoglycan-binding domain-containing protein 4	LYSM4	Q5XG99	145748	LYSMD4	9106-87	SL018787	-0.262214	0.117927	-2.22354	0.231137	-0.0310778	-0.493351	292	0.0261644	0.483276	0.695181
Adenylate kinase isoenzyme 1	Myokinase, human	P00568	203	AK1	5012-67	SL004296	0.321103	0.144504	2.2221	0.283228	0.604331	0.0378742	292	0.0262456	0.12663	0.355851
Lithostathine-1-beta	REG1B	P48304	5968	REG1B	16770-3	SL012438	-0.240511	0.108256	-2.22169	0.212182	-0.0283296	-0.452693	292	0.0262494	0.551009	0.7423
Vesicle-associated membrane protein 2	VAMP2	P63027	6844	VAMP2	17335-18	SL009105	0.154886	0.0696582	2.22351	0.13653	0.291416	0.0183558	292	0.0262898	0.828727	0.910344
Isochorismatase domain-containing protein 1	ISOC1	Q96CN7	51015	ISOC1	9816-37	SL015830	0.317571	0.143059	2.21985	0.280396	0.597967	0.0371741	292	0.0262994	0.195713	0.442395
Haloacid dehalogenase-like hydrolase domain-containing protein 2	HDHD2	Q9H0R4	84064	HDHD2	13472-35	SL016517	0.343892	0.154971	2.21907	0.303744	0.647636	0.0401485	292	0.0263843	0.122344	0.349777
Toll-interacting protein	tollip	Q9H0E2	54472	TOLLIP	13963-7	SL004521	0.344559	0.155175	2.22045	0.304144	0.648703	0.0404156	292	0.0263878	0.0785105	0.280197
Sphingosine kinase 1	Sphingosine kinase 1	Q9NYA1	8877	SPHK1	4294-16	SL006088	0.336545	0.151655	2.21915	0.297243	0.633788	0.039302	292	0.0264626	0.114815	0.338844
Thrombospondin type-1 domain-containing protein 7A	THS7A	Q9UPZ6	221981	THSD7A	9600-55	SL011312	0.211461	0.0951738	2.22184	0.186541	0.398002	0.0249205	292	0.0264753	0.671755	0.819607
Tropomyosin alpha-4 chain	Tropomyosin 4	P67936	7171	TPM4	9863-1	SL003646	0.32111	0.14478	2.21791	0.283769	0.60488	0.037341	292	0.0265082	0.181073	0.425527
Branched-chain-amino-acid aminotransferase, mitochondrial	BCAT2	O15382	587	BCAT2	19365-11	SL013348	0.331325	0.149509	2.21609	0.293038	0.624363	0.0382875	292	0.0265458	0.145974	0.382065
TOM1-like protein 1	TM1L1	O75674		TOM1L1	13652-2	SL020197	0.251282	0.113467	2.21459	0.222395	0.473677	0.0288878	292	0.0266449	0.528483	0.726968
Lupus La protein	LA	P05455	6741	SSB	13526-5	SL013009	0.258366	0.116864	2.21082	0.229053	0.487419	0.0293121	292	0.0266726	0.440826	0.663947
Protein S100-A8/A9 heterodimer	S100A8/S100A9	P05109, P06702	6279 6280	S100A8 S100A9	17145-1	SL004832	0.296716	0.13352	2.22226	0.261699	0.558415	0.0350164	292	0.0267224	0.308811	0.555707
Arsenite methyltransferase	AS3MT	Q9HBK9	57412	AS3MT	18417-3	SL021359	-0.286394	0.129376	-2.21366	0.253577	-0.0328171	-0.53997	292	0.0267291	0.4099	0.640235
Sclerostin	SOST	Q9BQB4	50964	SOST	13101-60	SL007631	0.170823	0.0771616	2.21383	0.151237	0.32206	0.0195859	292	0.0267785	0.635157	0.796968
Epithelial discoidin domain-containing receptor 1	discoidin domain receptor 1	Q08345	780	DDR1	4122-12	SL004119	0.261482	0.118001	2.21594	0.231281	0.492763	0.0302013	292	0.0267951	0.482935	0.694936
High mobility group protein B2	HMG-2	P26583	3148	HMGB2	6913-189	SL004640	0.24598	0.110624	2.22356	0.216824	0.462803	0.029156	292	0.0268402	0.506789	0.711891
Platelet glycoprotein VI	GPVI	Q9HCN6	51206	GP6	3194-36	SL008759	0.315427	0.142491	2.21366	0.279282	0.594708	0.0361448	292	0.0268521	0.192599	0.438861
Retinal rod rhodopsin-sensitive cGMP 3',5'-cyclic phosphodiesterase subunit delta	PDE6D	O43924		PDE6D	13491-40	SL020117	0.301187	0.135898	2.21628	0.26636	0.567547	0.0348274	292	0.0268647	0.297011	0.544987
T-lymphocyte activation antigen CD86	B7-2	P42081	942	CD86	5337-64	SL004131	0.242605	0.109447	2.21665	0.214516	0.457121	0.0280891	292	0.0269658	0.571392	0.755904
Serine protease inhibitor Kazal-type 8	ISK8	P0C7L1	646424	SPINK8	7962-11	SL018323	0.266123	0.120367	2.21093	0.235919	0.502042	0.0302042	292	0.0270279	0.429903	0.65567
Calcium/calmodulin-dependent 3',5'-cyclic nucleotide phosphodiesterase 1A	PDE1A	P54750	5136	PDE1A	5253-1	SL011400	0.331134	0.149952	2.20826	0.293906	0.62504	0.0372277	292	0.0271022	0.197557	0.444474
Guanine nucleotide exchange factor MSS4	MSS4	P47224	5877	RABIF	18483-36	SL014804	0.277222	0.125528	2.20845	0.246035	0.523257	0.0311875	292	0.0271331	0.45302	0.673067
Serpin B4	SCCA2	P48594	6318	SERPINB4	15444-45	SL001959	0.179203	0.0811019	2.20961	0.15896	0.338163	0.0202438	292	0.0271773	0.763106	0.873559
Sodium channel subunit beta-2	SCN2B	O60939	6327	SCN2B	8353-15	SL018464	0.266007	0.120347	2.21034	0.23588	0.501887	0.0301274	292	0.0273363	0.464957	0.681877
ADP-ribosylation factor-binding protein GGA3	GGA3	Q9NZ52		GGA3	11683-19	SL019567	0.339843	0.154236	2.20339	0.302303	0.642145	0.03754	292	0.0275209	0.0996116	0.315613
					10416-79		0.220653	0.100107	2.20417	0.196209	0.416862	0.0244434	292	0.0276256	0.65746	0.810839
NAD(P)H dehydrogenase [quinone] 1	NAD(P)H dehydrogenase	P15559	1728	NQO1	9837-60	SL006249	-0.175742	0.0797473	-2.20373	0.156305	-0.019437	-0.332046	292	0.027652	0.739207	0.859772
Lysine--tRNA ligase	SYK	Q15046	3735	KARS	19249-18	SL011670	0.3512	0.159605	2.20044	0.312825	0.664025	0.0383749	292	0.027731	0.0335485	0.183163
Recoverin	RECO	P35243	5957	RCVRN	14334-3	SL014781	0.266772	0.121068	2.20348	0.237294	0.504066	0.0294782	292	0.0277436	0.470944	0.686254
Biliverdin reductase A	BIEA	P53004	644	BLVRA	11382-5	SL006491	0.342658	0.155697	2.2008	0.305166	0.647824	0.0374923	292	0.0277667	0.0980968	0.313204
Serine/threonine-protein kinase B-raf	BRAF1	P15056	673	BRAF	15669-7	SL007123	0.325412	0.14805	2.19799	0.290178	0.615589	0.0352339	292	0.0278713	0.205972	0.453841
Uncharacterized protein C10orf105	CJ105	Q8TEF2		C10orf105	11220-53	SL019359	-0.278182	0.126633	-2.19676	0.248201	-0.0299813	-0.526383	292	0.0279207	0.433094	0.658099
					7746-230		-0.226446	0.102988	-2.19876	0.201857	-0.024589	-0.428302	292	0.02805	0.559603	0.748066
Radixin	Radixin	P35241	5962	RDX	18373-13	SL005848	0.336526	0.153357	2.1944	0.30058	0.637106	0.0359466	292	0.0280781	0.104586	0.323398
60S ribosomal protein L30	RL30	P62888	6156	RPL30	12478-15	SL008862	-0.307724	0.140058	-2.19712	0.274514	-0.0332107	-0.582238	292	0.028313	0.258522	0.508451
NAD kinase	NADK	O95544		NADK	13624-17	SL020213	0.251799	0.114884	2.19177	0.225173	0.476972	0.0266263	292	0.0283404	0.499477	0.706737
Interleukin-36 gamma	IL-1F9	Q9NZH8	56300	IL36G	9117-4	SL005180	0.259737	0.118237	2.19675	0.231744	0.491481	0.0279925	292	0.0283429	0.504136	0.710025
Desmocollin-1	Desmocollin-1	Q08554	1823	DSC1	10882-12	SL005718	0.229174	0.104321	2.19681	0.20447	0.433644	0.0247039	292	0.0283846	0.632664	0.795402
Nucleoside diphosphate kinase A	Nucleoside diphosphate kinase A	P15531	4830	NME1	5909-51	SL003687	0.316548	0.144564	2.18968	0.283345	0.599893	0.0332033	292	0.0284348	0.225247	0.474602
Disintegrin and metalloproteinase domain-containing protein 30	ADA30	Q9UKF2	11085	ADAM30	8520-8	SL018586	-0.277724	0.126445	-2.19641	0.247831	-0.0298925	-0.525555	292	0.0284525	0.461576	0.679394
Myeloid-derived growth factor	CS010	Q969H8	56005	MYDGF	9248-36	SL008272	0.304954	0.139249	2.18999	0.272928	0.577883	0.0320263	292	0.0284808	0.267355	0.517064
Ras GTPase-activating protein-binding protein 2	G3BP2	Q9UN86	9908	G3BP2	9831-12	SL015343	0.34159	0.15602	2.18939	0.3058	0.647389	0.03579	292	0.0284894	0.0694468	0.263528
DnaJ homolog subfamily B member 2	DNJB2	P25686		DNAJB2	11438-6	SL019476	0.346413	0.158131	2.19067	0.309937	0.65635	0.0364755	292	0.0285102	0.0701937	0.264941
Fibroblast growth factor 17	FGF-17	O60258	8822	FGF17	3494-71	SL004335	-0.285862	0.130425	-2.19177	0.255633	-0.0302288	-0.541496	292	0.028549	0.414934	0.644154
Glutathione peroxidase 2	GPX2	P18283	2877	GPX2	18894-1	SL007141	0.182762	0.0833955	2.19151	0.163455	0.346217	0.0193068	292	0.0286089	0.729799	0.854283
14-3-3 protein beta/alpha	14-3-3 protein beta/alpha	P31946	7529	YWHAB	14156-33	SL004815	0.332468	0.151995	2.18736	0.29791	0.630378	0.0345582	292	0.028627	0.11235	0.335187
Synaptic vesicle glycoprotein 2A	SV2A	Q7L0J3		SV2A	12880-1	SL019962	-0.261718	0.119561	-2.18899	0.23434	-0.0273782	-0.496058	292	0.0286508	0.415923	0.644921
COMM domain-containing protein 7	COMMD7	Q86VX2	149951	COMMD7	2823-7	SL004704	0.325197	0.148902	2.18397	0.291848	0.617045	0.0333495	292	0.0286634	0.150361	0.387764
Matrilin-3	MATN3	O15232	4148	MATN3	19361-78	SL006992	0.236661	0.107892	2.1935	0.211469	0.44813	0.0251924	292	0.0286657	0.524409	0.724161
Protein S100-A14	S100A14	Q9HCY8	57402	S100A14	17828-3	SL005106	0.263595	0.120191	2.19313	0.235575	0.49917	0.0280204	292	0.0287048	0.426575	0.653127
GPN-loop GTPase 1	GPN1	Q9HCN4		GPN1	16599-38	SL018803	0.326506	0.149304	2.18685	0.292636	0.619142	0.0338695	292	0.0287474	0.173144	0.416106
Thyroid hormone receptor alpha	THA	P10827	7067	THRA	12527-50	SL013736	-0.287801	0.131616	-2.18667	0.257967	-0.0298337	-0.545768	292	0.0288081	0.334305	0.578191
Mitochondrial import inner membrane translocase subunit TIM50	TIM50	Q3ZCQ8	92609	TIMM50	7743-5	SL018245	0.327979	0.150102	2.18504	0.2942	0.622179	0.0337793	292	0.0288263	0.142222	0.377123
Activin A	Activin A	P08476	3624	INHBA	19622-7	SL001938	-0.303548	0.139214	-2.18044	0.272859	-0.0306885	-0.576407	292	0.0288268	0.281369	0.530443
DnaJ homolog subfamily B member 14	DJB14	Q8TBM8	79982	DNAJB14	8053-16	SL018412	0.287928	0.131861	2.18358	0.258447	0.546376	0.0294811	292	0.0288915	0.356334	0.596937
Ectonucleoside triphosphate diphosphohydrolase 2	ENTP2	Q9Y5L3	954	ENTPD2	18887-7	SL015373	0.160699	0.0734959	2.1865	0.144052	0.304751	0.0166469	292	0.0290316	0.817443	0.904126
NADH dehydrogenase [ubiquinone] flavoprotein 2, mitochondrial	NDUV2	P19404	4729	NDUFV2	7748-11	SL008054	0.318387	0.145977	2.18107	0.286115	0.604502	0.0322717	292	0.0290491	0.186434	0.43178
[Protein ADP-ribosylarginine] hydrolase	ADPRH	P54922	141	ADPRH	18395-5	SL021343	-0.277975	0.12709	-2.18722	0.249097	-0.0288775	-0.527072	292	0.0290541	0.382594	0.618542
Switch-associated protein 70	SWP70	Q9UH65	23075	SWAP70	13552-7	SL010879	0.267011	0.121958	2.18937	0.239038	0.506049	0.0279732	292	0.0290581	0.470167	0.685687
DnaJ homolog subfamily A member 2	DNJA2	O60884	10294	DNAJA2	11582-63	SL007975	0.326169	0.149619	2.17999	0.293254	0.619423	0.0329153	292	0.0291296	0.166385	0.407903
Hydroxyacyl-coenzyme A dehydrogenase, mitochondrial	HCDH	Q16836	3033	HADH	17739-1	SL008218	0.331627	0.152103	2.18028	0.298122	0.629749	0.0335046	292	0.0291401	0.109088	0.330284
Fc receptor-like protein 3	FCRL3	Q96P31	115352	FCRL3	4440-15	SL014088	-0.178503	0.0820553	-2.1754	0.160828	-0.0176746	-0.339331	292	0.029469	0.772616	0.878986
Neuropilin and tolloid-like protein 1	NETO1	Q8TDF5	81832	NETO1	15298-199	SL017092	0.231227	0.106245	2.17635	0.208241	0.439468	0.0229859	292	0.0295244	0.55709	0.746384
Interferon alpha-16	IFN16	P05015	3449	IFNA16	6421-52	SL017458	-0.221604	0.101826	-2.17631	0.199578	-0.0220256	-0.421182	292	0.0296822	0.560282	0.74852
Complexin-1	CPLX1	O14810	10815	CPLX1	18332-17	SL020907	0.245121	0.112721	2.17458	0.220933	0.466055	0.0241877	292	0.0299384	0.497346	0.705227
Alpha-2-macroglobulin-like protein 1	A2ML1	A8K2U0	144568	A2ML1	15482-12	SL012348	0.159503	0.0733577	2.17432	0.143781	0.303284	0.0157218	292	0.0299424	0.799039	0.89389
Pyruvate kinase PKM	M2-PK	P14618	5315	PKM2	4240-31	SL002650	0.320448	0.147725	2.16922	0.289541	0.609989	0.030907	292	0.0299756	0.141897	0.376693
Calcium-binding protein 39	CAB39	Q9Y376	51719	CAB39	17757-86	SL006798	0.32546	0.150059	2.16887	0.294116	0.619576	0.0313435	292	0.0300085	0.124731	0.353173
Neurexophilin-1	NXPH1	P58417	30010	NXPH1	4562-1	SL012457	0.265213	0.121925	2.17522	0.238972	0.504185	0.0262406	292	0.0300356	0.458856	0.677389
Protein delta homolog 2	EGFL9	Q6UY11	65989	DLK2	9359-9	SL008677	0.239597	0.110278	2.17266	0.216145	0.455743	0.0234519	292	0.030048	0.525987	0.72525
Protocadherin-10	PCD10	Q9P2E7	57575	PCDH10	9018-38	SL018668	0.241168	0.111221	2.16836	0.217994	0.459162	0.0231742	292	0.0300777	0.449267	0.670274
Dual specificity mitogen-activated protein kinase kinase 6	MP2K6	P52564	5608	MAP2K6	17175-5	SL007270	0.28081	0.1294	2.17009	0.253625	0.534435	0.0271853	292	0.0301199	0.357698	0.598079
Kallikrein-14	kallikrein 14	Q9P0G3	43847	KLK14	15544-25	SL003919	0.244592	0.11249	2.17434	0.220481	0.465073	0.0241114	292	0.0301288	0.505249	0.710809
OX-2 membrane glycoprotein	OX2G	P41217	4345	CD200	5112-73	SL014268	-0.2724	0.125354	-2.17304	0.245694	-0.0267059	-0.518094	292	0.0301322	0.458272	0.676958
U6 snRNA-associated Sm-like protein LSm4	LSM4	Q9Y4Z0	25804	LSM4	16854-17	SL015367	0.275628	0.126843	2.17298	0.248613	0.524241	0.0270153	292	0.0301459	0.424053	0.651194
Spartin	SPG20	Q8N0X7		SPG20	11161-5	SL019340	0.325745	0.150314	2.1671	0.294616	0.620361	0.0311296	292	0.0302103	0.138692	0.372414
Amyloid-like protein 1	Amyloid-like protein 1	P51693	333	APLP1	7210-25	SL004470	0.234278	0.108348	2.16227	0.212362	0.44664	0.0219154	292	0.0303007	0.567048	0.753026
DNA-directed RNA polymerases I, II, and III subunit RPABC4	RPAB4	P53803	5440	POLR2K	19134-66	SL014837	0.314509	0.14493	2.17008	0.284062	0.598571	0.0304472	292	0.0303098	0.177641	0.421475
Glutathione peroxidase 7	GPX7	Q96SL4	2882	GPX7	8345-27	SL007609	0.298604	0.138061	2.16284	0.2706	0.569204	0.0280044	292	0.0303436	0.272948	0.522444
ATP synthase subunit f, mitochondrial	ATPK	P56134	9551	ATP5J2	11539-4	SL008136	-0.287745	0.133097	-2.16192	0.26087	-0.0268754	-0.548615	292	0.0304088	0.256319	0.506279
Glycylpeptide N-tetradecanoyltransferase 1	NMT1	P30419	4836	NMT1	5196-7	SL006476	0.316275	0.146178	2.16363	0.286509	0.602784	0.0297667	292	0.0304229	0.156257	0.395294
Putative spermatogenesis-associated protein 31D4	S31D4	Q6ZUB0	389761	SPATA31D4	9524-46	SL019067	-0.210158	0.0971647	-2.1629	0.190443	-0.0197148	-0.400601	292	0.0305652	0.506957	0.712009
Nuclear migration protein nudC	NUDC	Q9Y266	10726	NUDC	8887-21	SL018715	0.331791	0.153662	2.15923	0.301177	0.632969	0.0306141	292	0.030748	0.0929553	0.304886
Serine/threonine-protein kinase VRK1	VRK1	Q99986	7443	VRK1	12553-5	SL010954	-0.289709	0.134005	-2.16194	0.262649	-0.0270604	-0.552358	292	0.0307664	0.362558	0.602128
Mucin-like protein 1	MUCL1	Q96DR8	118430	MUCL1	10975-59	SL008738	0.22291	0.102888	2.16652	0.201661	0.424571	0.0212484	292	0.0307916	0.634578	0.796604
Endophilin-A1	SH3G2	Q99962	6456	SH3GL2	12499-108	SL015171	0.342919	0.158961	2.15726	0.311563	0.654482	0.0313564	292	0.0309322	0.0406654	0.201657
Small VCP/p97-interacting protein	SVIP	Q8NHG7	258010	SVIP	18285-6	SL008800	0.241119	0.111536	2.1618	0.218611	0.45973	0.0225081	292	0.0309439	0.501643	0.708267
Synaptosomal-associated protein 29	SNP29	O95721	9342	SNAP29	12357-41	SL016390	0.329914	0.15311	2.15475	0.300097	0.630011	0.0298176	292	0.0310647	0.0970184	0.311478
Vascular endothelial growth factor C	VEGF-C	P49767	7424	VEGFC	3132-1	SL004486	0.319186	0.148305	2.15223	0.290677	0.609864	0.0285091	292	0.0312224	0.199745	0.446928
Cullin-associated NEDD8-dissociated protein 1	CAND1	Q86VP6	55832	CAND1	13937-75	SL008246	0.336023	0.156228	2.15085	0.306207	0.64223	0.0298165	292	0.0313427	0.117779	0.34319
Docking protein 2	DOK2	O60496	9046	DOK2	14246-50	SL016379	0.323175	0.150301	2.15019	0.294589	0.617764	0.0285853	292	0.031473	0.137322	0.37057
CUB and sushi domain-containing protein 1	CSMD1	Q96PZ7	64478	CSMD1	9598-23	SL019047	0.299557	0.139364	2.14946	0.273153	0.57271	0.0264034	292	0.0315289	0.257173	0.507122
ER membrane protein complex subunit 4	TMM85	Q5J8M3	51234	EMC4	13516-46	SL016509	0.244951	0.113848	2.15156	0.223142	0.468093	0.0218091	292	0.031566	0.565603	0.752066
E3 ubiquitin-protein ligase pellino homolog 2	PELI2	Q9HAT8		PELI2	12702-13	SL019802	0.233141	0.108452	2.14971	0.212567	0.445708	0.0205743	292	0.0316256	0.578862	0.76083
Complement component C9	C9	P02748	735	C9	3060-43	SL000325	0.219583	0.102029	2.15215	0.199978	0.41956	0.0196048	292	0.0316536	0.616286	0.785039
Coiled-coil domain-containing protein 80	URB	Q76M96	151887	CCDC80	3234-23	SL010390	0.208733	0.0972044	2.14736	0.190521	0.399254	0.0182122	292	0.0317415	0.57482	0.758169
Small nuclear ribonucleoprotein Sm D3	SMD3	P62318	6634	SNRPD3	17774-38	SL013063	-0.245453	0.114383	-2.1459	0.22419	-0.0212637	-0.469643	292	0.0317669	0.464659	0.681659
Tumor necrosis factor ligand superfamily member 14	LIGHT	O43557	8740	TNFSF14	5355-69	SL004648	0.255855	0.119143	2.14745	0.233521	0.489376	0.0223338	292	0.0318001	0.49052	0.700371
Holo-Transcobalamin-2	Holo-TC II	P20062	6948	TCN2	5584-21	SL003335	-0.156258	0.072847	-2.14502	0.14278	-0.0134779	-0.299038	292	0.0318401	0.807762	0.898756
Adenosylhomocysteinase 2	SAHH2	O43865		AHCYL1	12652-37	SL019829	0.31829	0.148376	2.14516	0.290817	0.609108	0.027473	292	0.0318742	0.109886	0.331491
RAC-alpha serine/threonine-protein kinase	PKB	P31749	207	AKT1	15627-83	SL003721	0.32621	0.152028	2.14573	0.297974	0.624185	0.0282359	292	0.0318962	0.102595	0.320305
Ras GTPase-activating protein-binding protein 1	G3BP1	Q13283	10146	G3BP1	19266-35	SL013328	0.33734	0.157399	2.14322	0.308501	0.645841	0.0288385	292	0.0319774	0.0578708	0.240563
Protein FAM19A5	F19A5	Q7Z5A7	25817	FAM19A5	5609-92	SL012636	0.234856	0.10931	2.14854	0.214247	0.449103	0.0206091	292	0.0324803	0.535235	0.731597
Cryptic protein	CFC1	P0CG37	55997	CFC1	3294-55	SL010451	0.311209	0.145666	2.13645	0.285506	0.596715	0.0257022	292	0.0324985	0.254314	0.504296
Splicing factor 45	SPF45	Q96I25	84991	RBM17	17391-10	SL015530	0.317363	0.148579	2.13599	0.291215	0.608578	0.0261488	292	0.0325951	0.136815	0.369885
Platelet-activating factor acetylhydrolase IB subunit gamma	PA1B3	Q15102		PAFAH1B3	12374-8	SL019686	0.259144	0.12109	2.14009	0.237337	0.496481	0.0218068	292	0.0326014	0.102048	0.319449
Interleukin-11	IL-11	P20809	3589	IL11	4493-92	SL000470	0.303321	0.142054	2.13525	0.278426	0.581747	0.024895	292	0.0326019	0.288335	0.536968
Mitogen-activated protein kinase kinase kinase 3	MAP3K3	Q99759	4215	MAP3K3	12990-39	SL005017	0.295081	0.138071	2.13716	0.27062	0.565701	0.0244609	292	0.0326107	0.349268	0.590989
Protein kinase C iota type	KPCI	P41743	5584	PRKCI	3379-29	SL007228	0.335553	0.157403	2.13181	0.30851	0.644064	0.0270428	292	0.0329271	0.0593833	0.243687
Ubiquitin-conjugating enzyme E2 D2	UB2D2	P62837	7322	UBE2D2	18842-24	SL014870	0.278567	0.130672	2.13181	0.256117	0.534683	0.0224501	292	0.0329351	0.34326	0.585884
Torsin-1A-interacting protein 1	TOIP1	Q5JTV8	26092	TOR1AIP1	10606-34	SL018600	0.312684	0.146875	2.12892	0.287874	0.600558	0.0248098	292	0.0330791	0.182937	0.427711
Exosome complex component RRP40	Exosome component 3	Q9NQT5	51010	EXOSC3	12605-1	SL005742	0.136851	0.0641349	2.13381	0.125704	0.262556	0.0111471	292	0.0332056	0.843177	0.918247
U6 snRNA-associated Sm-like protein LSm1	LSM1	O15116	27257	LSM1	17795-176	SL013520	0.290358	0.136087	2.13362	0.266731	0.557089	0.0236273	292	0.0332947	0.284735	0.533606
GDNF family receptor alpha-2	GFRa-2	O00451	2675	GFRA2	2515-14	SL004143	0.167786	0.0787499	2.13062	0.15435	0.322136	0.0134362	292	0.0333307	0.774325	0.879958
SHC-transforming protein 1	SHC1	P29353	6464	SHC1	5272-55	SL014469	0.336068	0.158009	2.1269	0.309697	0.645765	0.0263712	292	0.0333326	0.0671576	0.259148
PRA1 family protein 3	PRAF3	O75915	10550	ARL6IP5	13503-19	SL007985	0.329346	0.154865	2.12667	0.303535	0.632881	0.0258116	292	0.0333387	0.0874492	0.295718
NSFL1 cofactor p47	NSF1C	Q9UNZ2	55968	NSFL1C	4250-23	SL006268	0.33874	0.159282	2.12667	0.312193	0.650933	0.0265468	292	0.0334519	0.0615224	0.248037
Eukaryotic translation initiation factor 4H	eIF-4H	Q15056	7458	EIF4H	5885-55	SL004924	0.320537	0.150681	2.12725	0.295336	0.615872	0.0252009	292	0.0334643	0.0393831	0.198452
Fetuin-B	FETUB	Q9UGM5	26998	FETUB	3367-8	SL006777	-0.130292	0.0613147	-2.12497	0.120177	-0.0101149	-0.250468	292	0.0336259	0.698568	0.835804
Protein disulfide-isomerase-like protein of the testis	PDILT	Q8N807	204474	PDILT	7092-7	SL018073	0.205963	0.0968501	2.12662	0.189826	0.395789	0.0161367	292	0.0336509	0.642324	0.801451
Calcium-activated chloride channel regulator 2	CLCA2	Q9UQC9	9635	CLCA2	8950-4	SL018772	0.260425	0.122795	2.12081	0.240678	0.501103	0.0197471	292	0.0336835	0.386513	0.621702
Histone acetyltransferase KAT2A	GCNL2	Q92830	2648	KAT2A	19369-17	SL007580	0.226039	0.106411	2.1242	0.208566	0.434605	0.0174726	292	0.0337273	0.626331	0.791411
Membrane-associated progesterone receptor component 1	PGRC1	O00264	10857	PGRMC1	7863-50	SL008875	0.325671	0.153567	2.1207	0.300992	0.626663	0.0246786	292	0.0338273	0.118493	0.344228
Ras-related protein Rab-6B	RAB6B	Q9NRW1	51560	RAB6B	14271-23	SL007707	0.321118	0.151503	2.11954	0.296947	0.618064	0.0241709	292	0.0338593	0.113291	0.336587
17-beta-hydroxysteroid dehydrogenase 14	DHB14	Q9BPX1		HSD17B14	13972-4	SL020263	0.214432	0.101063	2.12176	0.198083	0.412515	0.0163483	292	0.0338741	0.599367	0.774188
Dual specificity tyrosine-phosphorylation-regulated kinase 3	DYRK3	O43781	8444	DYRK3	4359-87	SL013570	0.260768	0.122619	2.12666	0.240332	0.501101	0.020436	292	0.033881	0.480247	0.692999
Signal transducer and activator of transcription 3	STAT3	P40763	6774	STAT3	10346-5	SL007221	0.335675	0.158396	2.11922	0.310456	0.646132	0.0252192	292	0.0339483	0.0584695	0.241805
DNA mismatch repair protein Msh2	MSH2	P43246	4436	MSH2	9739-4	SL019140	0.172277	0.0811104	2.12398	0.158976	0.331253	0.0133002	292	0.0340124	0.767908	0.876304
Endothelial cell-specific molecule 1	Endocan	Q9NQ30	11082	ESM1	3805-16	SL010458	0.220858	0.104162	2.12034	0.204157	0.425015	0.0167012	292	0.034263	0.493837	0.702735
Superoxide dismutase [Cu-Zn]	SOD	P00441	6647	SOD1	2794-60	SL000581	0.32984	0.155995	2.11442	0.30575	0.63559	0.0240893	292	0.0343966	0.12803	0.357812
DNA topoisomerase 2-binding protein 1	TOPB1	Q92547	11073	TOPBP1	9947-22	SL019213	0.201345	0.0949548	2.12043	0.186111	0.387456	0.0152333	292	0.0345355	0.67985	0.82453
Galactosylgalactosylxylosylprotein 3-beta-glucuronosyltransferase 3	B3GA3	O94766	26229	B3GAT3	6897-38	SL017973	-0.229989	0.10909	-2.10826	0.213816	-0.0161736	-0.443805	292	0.0346382	0.584833	0.764744
Tumor-associated calcium signal transducer 2	GA733-1 protein	P09758	4070	TACSTD2	2619-72	SL001890	0.309388	0.14632	2.11446	0.286788	0.596175	0.0226002	292	0.0346691	0.239171	0.489051
Kelch-like protein 13	KLH13	Q9P2N7		KLHL13	12463-7	SL019740	0.231907	0.109466	2.11854	0.214553	0.44646	0.0173543	292	0.0347258	0.456238	0.675454
MAP kinase-activated protein kinase 2	MAPK2	P49137	9261	MAPKAPK2	3820-68	SL010503	0.315887	0.149707	2.11004	0.293425	0.609312	0.0224614	292	0.0347644	0.138711	0.37244
Ubiquitin-conjugating enzyme E2 T	UBE2T	Q9NPD8	29089	UBE2T	12400-25	SL015259	-0.239807	0.113664	-2.10979	0.222781	-0.0170256	-0.462588	292	0.0347663	0.476666	0.69041
Ras-related protein Rab-35	Rab-1C	Q15286	11021	RAB35	13514-121	SL005732	0.227286	0.10738	2.11666	0.210464	0.43775	0.0168217	292	0.0348136	0.610714	0.781482
Programmed cell death 6-interacting protein	PDC6I	Q8WUM4	10015	PDCD6IP	18174-79	SL008888	0.328643	0.155965	2.10716	0.30569	0.634333	0.0229523	292	0.0348649	0.0994484	0.315354
Aspartyl/asparaginyl beta-hydroxylase	HAAH	Q12797	444	ASPH	6998-106	SL005528	0.283022	0.134409	2.10567	0.263442	0.546464	0.01958	292	0.0348719	0.339617	0.582767
Receptor-type tyrosine-protein phosphatase R	PTPRR	Q15256	5801	PTPRR	6361-49	SL017437	0.231056	0.109561	2.10892	0.21474	0.445796	0.0163161	292	0.0349456	0.584574	0.764574
Nascent polypeptide-associated complex subunit alpha	NACA	Q13765	4666	NACA	3854-24	SL011631	0.330694	0.156866	2.10813	0.307457	0.638151	0.0232371	292	0.0350242	0.0676544	0.260105
Nucleobindin-1	NUCB1	Q02818	4924	NUCB1	10451-11	SL008914	-0.275531	0.130483	-2.11162	0.255747	-0.0197838	-0.531278	292	0.0350401	0.413609	0.643124
Cullin-1	CUL1	Q13616	8454	CUL1	17797-1	SL010967	0.276453	0.131394	2.104	0.257532	0.533985	0.0189203	292	0.0350991	0.326753	0.571623
Protein NOV homolog	NovH	P48745	4856	NOV	2737-22	SL005236	0.236627	0.112427	2.10471	0.220357	0.456984	0.0162694	292	0.0351307	0.562456	0.74997
Interleukin-23 receptor	IL-23 R	Q5VWK5	149233	IL23R	5088-175	SL005185	0.299444	0.142258	2.10493	0.278826	0.57827	0.020618	292	0.0351688	0.235569	0.485355
Hydroxyacylglutathione hydrolase, mitochondrial	GLO2	Q16775	3029	HAGH	19267-14	SL010992	0.277374	0.131613	2.10749	0.257961	0.535335	0.0194122	292	0.0352916	0.0879883	0.296628
Protein arginine N-methyltransferase 3	ANM3	O60678	10196	PRMT3	12696-166	SL019815	0.25675	0.122087	2.10301	0.239291	0.496041	0.0174597	292	0.0353346	0.477106	0.690728
Tyrosine-protein kinase Lyn, isoform B	LYNB	P07948	4067	LYN	3381-24	SL010500	0.329382	0.156733	2.10155	0.307197	0.636579	0.0221848	292	0.0354126	0.071025	0.266505
10 kDa heat shock protein, mitochondrial	HSP 10	P61604	3336	HSPE1	17150-8	SL005698	0.316349	0.150518	2.10174	0.295014	0.611363	0.0213343	292	0.035425	0.124804	0.353277
					11993-227		0.172173	0.0819279	2.10152	0.160579	0.332752	0.0115943	292	0.0355858	0.753155	0.867845
Synaptotagmin-8	SYT8	Q8NBV8	90019	SYT8	7932-23	SL018340	0.200641	0.0955109	2.10071	0.187201	0.387842	0.0134396	292	0.0357937	0.69078	0.831132
DCC-interacting protein 13-alpha	DP13A	Q9UKG1		APPL1	12825-18	SL019955	0.223754	0.106766	2.09573	0.209262	0.433016	0.0144917	292	0.0358139	0.565527	0.752015
Phospholipase A2, membrane associated	NPS-PLA2	P14555	5320	PLA2G2A	2692-74	SL002528	0.19251	0.0918526	2.09586	0.180031	0.372541	0.012479	292	0.0360905	0.607821	0.779629
Immunoglobulin superfamily member 8	IGSF8	Q969P0	93185	IGSF8	6984-6	SL008731	0.251407	0.119889	2.09699	0.234983	0.48639	0.0164236	292	0.0360922	0.472605	0.687462
Endophilin-A3	SH3G3	Q99963	6457	SH3GL3	18318-98	SL020960	0.328621	0.156932	2.09404	0.307586	0.636207	0.0210353	292	0.0361737	0.0616658	0.248326
GTP-binding protein SAR1a	SAR1A	Q9NR31	56681	SAR1A	17726-3	SL016526	0.309932	0.148126	2.09235	0.290328	0.60026	0.0196039	292	0.0362266	0.133476	0.365344
MOB-like protein phocein	MOBL3	Q9Y3A3	25843	MOBKL3	19332-1	SL016539	0.276386	0.132354	2.08824	0.259414	0.5358	0.0169726	292	0.0364445	0.320597	0.566213
Casein kinase II subunit beta	CSK2B	P67870	1460	CSNK2B	11330-15	SL013806	-0.267854	0.128092	-2.09111	0.25106	-0.0167938	-0.518914	292	0.0364611	0.266621	0.516354
Cytoplasmic protein NCK1	NCK1	P16333	4690	NCK1	5014-49	SL006091	0.270383	0.129576	2.08667	0.25397	0.524353	0.0164132	292	0.0365997	0.337477	0.580928
Granulocyte colony-stimulating factor receptor	G-CSF-R	Q99062	1441	CSF3R	2719-3	SL004591	-0.271396	0.129892	-2.0894	0.254588	-0.0168079	-0.525983	292	0.0366056	0.356097	0.596739
Glycine N-acyltransferase	GLYAT	Q6IB77	10249	GLYAT	19506-6	SL015017	-0.246826	0.118123	-2.08956	0.231522	-0.0153044	-0.478348	292	0.0366094	0.501296	0.708022
CDGSH iron-sulfur domain-containing protein 1	ZCD1	Q9NZ45	55847	CISD1	7745-3	SL008314	0.227719	0.108974	2.08967	0.213588	0.441307	0.0141306	292	0.0368918	0.573157	0.757071
Homeodomain-only protein	HOP	Q9BPY8	84525	HOPX	19196-73	SL015588	-0.215557	0.103398	-2.08473	0.20266	-0.0128968	-0.418216	292	0.0369503	0.587251	0.766323
Annexin A8	Annexin A8	P13928	653145	ANXA8	18290-6	SL004909	-0.269062	0.129087	-2.08434	0.253011	-0.0160503	-0.522073	292	0.0369597	0.434111	0.658871
T-complex protein 11 homolog	TCP11	Q8WWU5	6954	TCP11	8334-65	SL018477	0.237575	0.113585	2.0916	0.222627	0.460203	0.0149476	292	0.0370891	0.492402	0.701713
Galectin-7	Galectin-7	P47929	3963	LGALS7	9196-8	SL005166	0.259022	0.124426	2.08173	0.243876	0.502898	0.0151465	292	0.0371222	0.446142	0.667938
Complement C1q-like protein 2	C1QL2	Q7Z5L3	165257	C1QL2	15670-15	SL017430	0.242132	0.116174	2.08421	0.227702	0.469833	0.01443	292	0.0373492	0.537626	0.73323
RNA polymerase II subunit A C-terminal domain phosphatase SSU72	SSU72	Q9NP77		SSU72	13566-2	SL020204	0.270319	0.12996	2.08001	0.254722	0.525041	0.0155969	292	0.0373748	0.377982	0.614802
Syntaxin-10	STX10	O60499		STX10	12842-43	SL019968	0.299846	0.144069	2.08127	0.282375	0.582221	0.0174709	292	0.0374114	0.241715	0.491646
Neurexin-1-beta	NRX1B	P58400	9378	NRXN1	5110-84	SL009054	0.261168	0.125577	2.07974	0.246131	0.507299	0.015037	292	0.0374598	0.407887	0.63866
Apoptosis-inducing factor 1, mitochondrial	AIF	O95831	9131	AIFM1	9522-3	SL003708	0.292292	0.140577	2.07923	0.275531	0.567823	0.0167605	292	0.037495	0.246254	0.49624
					9362-11		0.148506	0.0714275	2.07912	0.139998	0.288504	0.00850856	292	0.0375611	0.779956	0.883151
Mothers against decapentaplegic homolog 2	SMAD2	Q15796	4087	SMAD2	10364-6	SL004101	0.319464	0.153751	2.0778	0.301351	0.620815	0.0181123	292	0.0375922	0.107841	0.328391
Glutathione S-transferase theta-1	GSTT1	P30711	2952	GSTT1	19230-12	SL013768	-0.173717	0.0835678	-2.07876	0.163793	-0.00992459	-0.33751	292	0.0376948	0.75723	0.870189
Sodium-coupled monocarboxylate transporter 1	SC5A8	Q8N695		SLC5A8	13691-10	SL020232	0.244939	0.118127	2.07352	0.23153	0.476469	0.0134094	292	0.0378949	0.517284	0.719224
Somatoliberin	Growth hormone-releasing factor	P01286	2691	GHRH	16293-1	SL005255	0.277344	0.13367	2.07484	0.261994	0.539338	0.0153503	292	0.0379471	0.33721	0.580698
Catalase	Catalase	P04040	847	CAT	3488-64	SL000342	0.255048	0.123023	2.07316	0.241126	0.496173	0.0139218	292	0.0379545	0.135439	0.36802
Histone deacetylase 8	HDAC8	Q9BY41	55869	HDAC8	2859-69	SL004723	0.301028	0.145308	2.07166	0.284804	0.585832	0.0162245	292	0.038046	0.238853	0.488726
Sorting nexin-5	SNX5	Q9Y5X3	27131	SNX5	18327-6	SL016768	0.314548	0.151879	2.07105	0.297682	0.61223	0.0168663	292	0.0381007	0.101249	0.318196
Dyslexia-associated protein KIAA0319-like protein	K319L	Q8IZA0		KIAA0319L	13698-28	SL020223	0.282654	0.136346	2.07306	0.267239	0.549892	0.0154151	292	0.0381102	0.326032	0.570993
Zyxin	Zyxin	Q15942	7791	ZYX	13632-10	SL009456	0.303707	0.146597	2.07171	0.287331	0.591038	0.0163763	292	0.0381739	0.167778	0.409607
Securin	Securin	O95997	9232	PTTG1	17727-1	SL005062	0.200574	0.0970179	2.06739	0.190155	0.390729	0.0104187	292	0.0384601	0.643466	0.802163
HCE000414	HCE000414	HCE000414	HCE000414	HCE000414	2194-91	HCE000414	0.342511	0.165474	2.06988	0.324329	0.66684	0.0181823	292	0.0385238	0.00979404	0.0989648
Tropomodulin-3	TMOD3	Q9NYL9	29766	TMOD3	12861-13	SL006759	0.340145	0.164903	2.0627	0.32321	0.663355	0.016935	292	0.0387007	0.00329711	0.0574205
Glucosamine 6-phosphate N-acetyltransferase	GNA1	Q96EK6		GNPNAT1	13954-9	SL020298	0.315898	0.153088	2.0635	0.300053	0.615951	0.0158444	292	0.0389888	0.082971	0.288047
Asporin	ASPN	Q9BXN1	54829	ASPN	6451-64	SL008299	-0.258015	0.124936	-2.06518	0.244875	-0.0131403	-0.50289	292	0.0390219	0.368318	0.606892
Adenosine deaminase CECR1	CECR1	Q9NZK5	51816	CECR1	6077-63	SL013510	-0.126085	0.0611607	-2.06153	0.119875	-0.00620957	-0.245959	292	0.0392035	0.867962	0.931645
Hematopoietic prostaglandin D synthase	PTGD2	O60760	27306	HPGDS	12549-33	SL014636	0.233648	0.113205	2.06394	0.221882	0.45553	0.0117661	292	0.0392112	0.556086	0.745712
E3 ubiquitin-protein ligase CBL	CBL	P22681	867	CBL	12016-60	SL013756	0.325989	0.158353	2.05862	0.310372	0.636361	0.015617	292	0.0393169	0.0675594	0.259922
Deoxyuridine 5'-triphosphate nucleotidohydrolase, mitochondrial	DUT	P33316	1854	DUT	9995-6	SL013164	0.314745	0.152971	2.05754	0.299823	0.614568	0.0149212	292	0.0393715	0.108549	0.329467
Leucine-rich repeat-containing protein 3B	LRC3B	Q96PB8		LRRC3B	18947-3	SL017499	-0.199552	0.0970363	-2.05646	0.190191	-0.00936052	-0.389743	292	0.0394364	0.676086	0.822244
Serine hydroxymethyltransferase, mitochondrial	GLYM	P34897	6472	SHMT2	12691-44	SL015512	0.307532	0.149524	2.05673	0.293068	0.6006	0.0144638	292	0.0395214	0.147763	0.3844
C1GALT1-specific chaperone 1	C1GLC	Q96EU7	29071	C1GALT1C1	5735-54	SL017110	0.226315	0.11027	2.05237	0.216129	0.442444	0.0101858	292	0.0397624	0.586401	0.765768
Oligoribonuclease, mitochondrial	ORN	Q9Y3B8		REXO2	13590-1	SL020207	0.317477	0.154551	2.05419	0.30292	0.620397	0.0145571	292	0.0398007	0.112741	0.335769
T-box transcription factor TBX5	TBX5	Q99593		TBX5	11202-70	SL019350	-0.247943	0.120939	-2.05016	0.23704	-0.0109034	-0.484983	292	0.0402273	0.473091	0.687816
					8824-2		-0.206281	0.100785	-2.04674	0.197539	-0.00874225	-0.403821	292	0.0403288	0.582094	0.762951
Fibroblast growth factor 8 isoform A	FGF-8A	P55075	2253	FGF8	4394-71	SL014308	0.294899	0.144148	2.04582	0.282529	0.577429	0.0123702	292	0.0403376	0.245215	0.495192
ATP-dependent Clp protease proteolytic subunit, mitochondrial	ClpP endopeptidase	Q16740	8192	CLPP	17196-5	SL011328	0.282263	0.137826	2.04796	0.270139	0.552402	0.0121233	292	0.0404218	0.314055	0.560406
Poly(U)-specific endoribonuclease	PP11	P21128	8909	ENDOU	5656-53	SL012424	0.209826	0.10239	2.04927	0.200685	0.410511	0.00914049	292	0.0405127	0.585611	0.765252
C-C motif chemokine 27	CTACK	Q9Y4X3	10850	CCL27	2192-63	SL003168	0.292014	0.14266	2.04691	0.279615	0.571628	0.012399	292	0.0405234	0.288432	0.537058
					8518-55		0.199767	0.0974422	2.05011	0.190987	0.390754	0.0087803	292	0.0406735	0.674611	0.821347
DnaJ homolog subfamily C member 18	DJC18	Q9H819	202052	DNAJC18	8033-1	SL018389	0.152482	0.0744577	2.0479	0.145937	0.298419	0.00654508	292	0.0408511	0.816465	0.903584
Disintegrin and metalloproteinase domain-containing protein 10	ADAM 10	O14672	102	ADAM10	8654-13	SL004641	-0.256508	0.125476	-2.04427	0.245934	-0.0105738	-0.502442	292	0.0410067	0.438417	0.662131
Butyrophilin-like protein 3	BTNL3	Q6UXE8	10917	BTNL3	10848-137	SL018632	0.223007	0.109225	2.04172	0.214082	0.437089	0.00892549	292	0.0410637	0.508688	0.713224
Leucine-rich repeat-containing protein 59	LRC59	Q96AG4	55379	LRRC59	19163-26	SL011278	0.318207	0.155913	2.04093	0.30559	0.623797	0.0126177	292	0.0410665	0.073093	0.270357
Dolichyl-diphosphooligosaccharide--protein glycosyltransferase subunit 1	RPN1	P04843	6184	RPN1	6458-6	SL011102	-0.125007	0.0611462	-2.04439	0.119846	-0.00516013	-0.244853	292	0.0410892	0.889004	0.94287
Tubulin polymerization-promoting protein family member 2	TPPP2	P59282		TPPP2	12800-5	SL019890	0.237586	0.116084	2.04667	0.227525	0.465111	0.010061	292	0.0411493	0.449524	0.670465
Testin	TES	Q9UGI8	26136	TES	17419-17	SL013289	-0.226315	0.110897	-2.04077	0.217359	-0.00895674	-0.443674	292	0.0412207	0.390238	0.62469
Caveolin-3	CAV3	P56539	859	CAV3	8690-25	SL018617	0.254243	0.124504	2.04204	0.244029	0.498271	0.0102141	292	0.0412288	0.473944	0.688436
Interferon-induced GTP-binding protein Mx1	Mx1	P20591	4599	MX1	17460-51	SL004388	-0.197498	0.0969913	-2.03625	0.190103	-0.00739537	-0.387601	292	0.0412695	0.638237	0.798897
Visinin-like protein 1	VISL1	P62760	7447	VSNL1	13522-20	SL007318	0.21055	0.102904	2.04608	0.201692	0.412242	0.00885811	292	0.0413431	0.639573	0.799733
Homer protein homolog 1	HOME1	Q86YM7	9456	HOMER1	19229-92	SL015060	0.279909	0.137518	2.03544	0.269535	0.549444	0.0103741	292	0.0414536	0.271126	0.520698
Protein kinase C-binding protein NELL1	NELL1	Q92832	4745	NELL1	6544-33	SL012542	0.161339	0.0791307	2.0389	0.155096	0.316436	0.00624307	292	0.0414752	0.737364	0.858699
Plexin-C1	PLXC1	O60486	10154	PLXNC1	4564-2	SL006406	0.235118	0.115281	2.03952	0.22595	0.461068	0.0091672	292	0.0414909	0.501005	0.707817
Zinc finger protein 566	ZN566	Q969W8		ZNF566	12795-2	SL019910	-0.218896	0.107331	-2.03945	0.210369	-0.00852699	-0.429265	292	0.0415272	0.484039	0.695729
Alpha-1-antitrypsin	a1-Antitrypsin	P01009	5265	SERPINA1	3580-25	SL000249	0.184238	0.0905217	2.03529	0.177423	0.361661	0.00681554	292	0.0416818	0.686573	0.828597
Nicotinate-nucleotide pyrophosphorylase [carboxylating]	NADC	Q15274	23475	QPRT	17789-1	SL008944	-0.253179	0.124475	-2.03397	0.243972	-0.0092072	-0.497151	292	0.0417678	0.463419	0.680749
Protein GPR107	GP107	Q5VW38	57720	GPR107	12963-1	SL015007	0.232316	0.114263	2.03317	0.223956	0.456271	0.00836013	292	0.0417837	0.525461	0.724887
Set1/Ash2 histone methyltransferase complex subunit ASH2	ASH2L	Q9UBL3	9070	ASH2L	12832-10	SL019949	0.294909	0.144944	2.03465	0.28409	0.578999	0.0108195	292	0.0418696	0.219036	0.468013
Protein FAM49B	FA49B	Q9NUQ9	51571	FAM49B	19176-27	SL011300	0.311248	0.153049	2.03365	0.299976	0.611224	0.0112728	292	0.0419947	0.139646	0.373692
Dual specificity protein phosphatase 3	DUS3	P51452	1845	DUSP3	3480-7	SL008122	0.276755	0.13625	2.03124	0.267049	0.543804	0.00970583	292	0.0420276	0.127092	0.3565
Long-chain specific acyl-CoA dehydrogenase, mitochondrial	ACADL	P28330	33	ACADL	17857-6	SL020990	-0.222103	0.109401	-2.03017	0.214426	-0.00767713	-0.43653	292	0.0421263	0.555202	0.745119
Mycophenolic acid acyl-glucuronide esterase, mitochondrial	ABHDA	Q9NUJ1	55347	ABHD10	17370-186	SL009448	0.302187	0.149064	2.02723	0.292165	0.594352	0.0100221	292	0.0423778	0.147745	0.384377
Semaphorin-4C	SEM4C	Q9C0C4	54910	SEMA4C	7923-41	SL018333	0.258503	0.127312	2.03047	0.249531	0.508034	0.00897141	292	0.0423896	0.421947	0.649575
Mitochondrial import inner membrane translocase subunit Tim8 A	TIM8A	O60220	1678	TIMM8A	19148-58	SL012993	0.305618	0.150648	2.02869	0.29527	0.600888	0.0103478	292	0.0424321	0.123137	0.350909
Coiled-coil domain-containing protein 134	CC134	Q9H6E4	79879	CCDC134	15300-66	SL017096	0.296545	0.146321	2.02667	0.286789	0.583334	0.00975574	292	0.0424849	0.166124	0.407583
Tumor necrosis factor alpha-induced protein 8	TFIP8	O95379		TNFAIP8	12563-2	SL019770	0.296118	0.14613	2.02639	0.286416	0.582534	0.00970202	292	0.0425057	0.177587	0.42141
Ribonuclease pancreatic	RNase 1	P07998	6035	RNASE1	7211-2	SL005355	-0.174744	0.0863587	-2.02347	0.169263	-0.00548115	-0.344007	292	0.0425651	0.541474	0.735849
Charged multivesicular body protein 2a	CHM2A	O43633	27243	CHMP2A	17728-61	SL008404	0.303876	0.149959	2.02639	0.29392	0.597796	0.00995571	292	0.0425719	0.143016	0.378174
3-keto-steroid reductase	DHB7	P56937	51478	HSD17B7	8272-22	SL018457	0.198338	0.0979576	2.02474	0.191997	0.390335	0.00634134	292	0.0426249	0.627979	0.792451
					9010-3		-0.226695	0.111789	-2.02789	0.219106	-0.0075888	-0.445801	292	0.0427872	0.564349	0.751232
Alpha-N-acetylglucosaminidase	NAG	P54802	4669	NAGLU	15509-2	SL003640	0.20059	0.0990484	2.02518	0.194135	0.394725	0.00645563	292	0.0431016	0.588453	0.767107
1-phosphatidylinositol 4,5-bisphosphate phosphodiesterase gamma-2	PLCG2	P16885	5336	PLCG2	10070-22	SL016406	0.292991	0.145053	2.01989	0.284304	0.577295	0.00868685	292	0.0432417	0.168247	0.410179
Ras-related protein Rab-4A	RAB4A	P20338	5867	RAB4A	16883-57	SL007144	0.304887	0.150986	2.01931	0.295933	0.60082	0.00895468	292	0.0432679	0.130494	0.36124
Alpha-ketoglutarate-dependent dioxygenase alkB homolog 3	ALKB3	Q96Q83	221120	ALKBH3	18401-18	SL021349	0.286713	0.141972	2.0195	0.278266	0.564979	0.00844736	292	0.0433011	0.254301	0.504283
Guanylate-binding protein 1	GBP1	P32455	2633	GBP1	15326-64	SL006479	-0.234967	0.116455	-2.01767	0.228251	-0.00671584	-0.463218	292	0.0434245	0.497604	0.70541
Mitogen-activated protein kinase kinase kinase kinase 1	M4K1	Q92918	11184	MAP4K1	8954-30	SL018793	0.280917	0.139123	2.0192	0.272681	0.553597	0.0082359	292	0.0434288	0.244887	0.49486
Gamma-soluble NSF attachment protein	SNAG	Q99747	8774	NAPG	17773-26	SL013253	0.303075	0.150249	2.01715	0.294488	0.597563	0.00858627	292	0.0435129	0.141375	0.375998
Ezrin	Ezrin	P15311	7430	EZR	9753-17	SL003645	0.298125	0.147957	2.01494	0.289996	0.588121	0.0081287	292	0.0435264	0.12843	0.358372
Homeobox protein DLX-4	DLX4	Q92988		DLX4	11910-27	SL019039	0.301502	0.149596	2.01543	0.293209	0.59471	0.00829264	292	0.043615	0.134566	0.366832
Activated RNA polymerase II transcriptional coactivator p15	TCP4	P53999	10923	SUB1	19236-24	SL013049	-0.308271	0.15281	-2.01734	0.299508	-0.00876283	-0.60778	292	0.043671	0.121189	0.348123
Beta-2-glycoprotein 1	b2-Glycoprotein I	P02749	350	APOH	8288-27	SL000282	0.263439	0.130967	2.01149	0.256696	0.520134	0.00674306	292	0.0438243	0.319685	0.565407
Progonadoliberin-2	GON2	O43555	2797	GNRH2	10708-3	SL007007	0.203533	0.100914	2.01688	0.197792	0.401325	0.00574036	292	0.0439301	0.647932	0.804942
Interleukin-17 receptor A	IL-17 sR	Q96F46	23765	IL17RA	2992-59	SL004850	0.162387	0.0806237	2.01414	0.158022	0.32041	0.00436479	292	0.0439784	0.777456	0.881735
Tyrosine-protein kinase Tec	TEC	P42680	7006	TEC	16079-2	SL010518	0.293912	0.146045	2.01248	0.286248	0.58016	0.00766419	292	0.0440257	0.140374	0.374665
[Pyruvate dehydrogenase (acetyl-transferring)] kinase isozyme 1, mitochondrial	PDK1	Q15118	5163	PDK1	5227-60	SL006921	0.279756	0.139169	2.01018	0.272772	0.552528	0.00698403	292	0.0440548	0.283241	0.532204
Calcium/calmodulin-dependent protein kinase type IV	KCC4	Q16566	814	CAMK4	18904-23	SL021171	0.211686	0.105288	2.01055	0.206364	0.41805	0.00532198	292	0.0441243	0.588247	0.766973
RAC-beta serine/threonine-protein kinase	PKB beta	P31751	208	AKT2	14685-17	SL003722	0.244178	0.121583	2.00833	0.238303	0.482481	0.00587564	292	0.0442119	0.437248	0.661247
E3 ubiquitin-protein ligase RNF114	RN114	Q9Y508	55905	RNF114	9957-9	SL019193	0.234584	0.116669	2.01068	0.228671	0.463254	0.00591301	292	0.044335	0.538636	0.733918
					6417-55		0.11953	0.0594563	2.01038	0.116534	0.236064	0.00299513	292	0.0445721	0.851309	0.922664
Interleukin-17 receptor D	IL-17 RD	Q8NFM7	54756	IL17RD	3376-49	SL010613	0.22786	0.113325	2.01068	0.222117	0.449977	0.00574294	292	0.0445915	0.514142	0.717037
Acid-sensing ion channel 4	ASIC4	Q96FT7	55515	ASIC4	6951-26	SL017965	-0.267111	0.132904	-2.00981	0.260491	-0.00661931	-0.527602	292	0.0446684	0.309176	0.556036
Intercellular adhesion molecule 1	sICAM-1	P05362	3383	ICAM1	4342-10	SL002922	-0.108597	0.0540771	-2.0082	0.105991	-0.00260638	-0.214589	292	0.0446912	0.88865	0.942682
Bifunctional methylenetetrahydrofolate dehydrogenase/cyclohydrolase, mitochondrial	MTDC	P13995	10797	MTHFD2	18321-38	SL014717	0.287601	0.143655	2.00202	0.281564	0.569165	0.00603642	292	0.0448574	0.232911	0.482609
DNA repair protein RAD51 homolog 4	RA51D	O75771	5892	RAD51L3	12554-10	SL013725	0.244032	0.121886	2.00214	0.238897	0.482929	0.00513579	292	0.0450113	0.434033	0.658812
Kininogen-1	Kininogen, HMW	P01042	3827	KNG1	7784-1	SL017189	-0.233656	0.116791	-2.00063	0.228911	-0.00474483	-0.462566	292	0.0452638	0.516509	0.718686
Complement C4b	C4b	P0C0L4 P0C0L5	720 721	C4A C4B	2182-54	SL000318	0.179987	0.0900202	1.99941	0.17644	0.356427	0.0035479	292	0.0453304	0.676285	0.822366
L-lactate dehydrogenase A chain	LDHA	P00338	3939	LDHA	15414-316	SL019149	0.275307	0.137774	1.99825	0.270037	0.545345	0.00526971	292	0.0453514	0.256928	0.50688
Protein HEXIM2	HEXI2	Q96MH2		HEXIM2	14205-6	SL019865	0.304668	0.152496	1.99788	0.298891	0.60356	0.00577713	292	0.0453681	0.15078	0.388304
Platelet glycoprotein V	GPV	P40197	2814	GP5	7185-29	SL006482	0.275624	0.137842	1.99957	0.270171	0.545795	0.00545389	292	0.0453752	0.267931	0.51762
Vesicle-associated membrane protein 7	VAMP7	P51809	6845	VAMP7	19357-11	SL016435	0.245559	0.122886	1.99826	0.240857	0.486415	0.00470219	292	0.0455258	0.488304	0.698787
Arylsulfatase K	ARSK	Q6UWY0	153642	ARSK	8269-327	SL012602	0.219378	0.109852	1.99702	0.215311	0.434689	0.0040672	292	0.0456968	0.588686	0.767259
Insulin-like peptide INSL5	INSL5	Q9Y5Q6	10022	INSL5	10462-14	SL012880	-0.212908	0.106596	-1.99733	0.208929	-0.00397921	-0.421837	292	0.0456996	0.577563	0.759976
Heat shock 70 kDa protein 1A	HSP 70	P0DMV8	3303	HSPA1A	10721-76	SL000451	-0.221744	0.111131	-1.99534	0.217816	-0.00392718	-0.43956	292	0.0457892	0.557394	0.746588
MOB kinase activator 1B	MOL1A	Q7L9L4	92597	MOBKL1A	19177-7	SL011252	0.295142	0.147951	1.99486	0.289985	0.585127	0.00515692	292	0.0458071	0.140373	0.374664
Geranylgeranyl pyrophosphate synthase	GGPPS	O95749	9453	GGPS1	17786-5	SL020915	0.288115	0.14457	1.99291	0.283357	0.571472	0.00475806	292	0.0458492	0.208129	0.456211
Osteopetrosis-associated transmembrane protein 1	OSTM1	Q86WC4	28962	OSTM1	19353-25	SL015055	0.239358	0.120017	1.99437	0.235233	0.474591	0.00412502	292	0.0458593	0.502543	0.708903
Tryptophan 2,3-dioxygenase	T23O	P48775	6999	TDO2	9880-33	SL019158	-0.244423	0.122755	-1.99115	0.240599	-0.0038233	-0.485022	292	0.0462228	0.382141	0.618175
Sorting nexin-1	SNX1	Q13596	6642	SNX1	6955-68	SL014932	0.255505	0.12825	1.99224	0.251369	0.506874	0.00413533	292	0.0462505	0.343144	0.585785
Regulator of microtubule dynamics protein 1	RMD1	Q96DB5	51115	RMDN1	7096-30	SL018122	0.306281	0.153874	1.99047	0.301593	0.607874	0.00468852	292	0.046277	0.0972398	0.311833
C-C motif chemokine 14	HCC-1	Q16627	6358	CCL14	2900-53	SL003329	0.193283	0.0970692	1.99119	0.190256	0.383539	0.00302728	292	0.0463887	0.528336	0.726867
Interleukin-1 receptor-associated kinase 4	IRAK4	Q9NWZ3	51135	IRAK4	18162-167	SL004504	0.292695	0.147196	1.98846	0.288505	0.5812	0.00418958	292	0.0466206	0.167469	0.40923
DnaJ homolog subfamily C member 27	DJC27	Q9NZQ0		DNAJC27	12799-65	SL019880	0.188686	0.094836	1.9896	0.185879	0.374565	0.0028076	292	0.0467358	0.674126	0.821052
Protein O-glucosyltransferase 1	KTEL1	Q8NBL1	56983	POGLUT1	6467-65	SL012705	0.301974	0.152113	1.9852	0.298141	0.600115	0.00383378	292	0.0468813	0.0920755	0.303439
Ubiquitin-like protein ISG15	UCRP	P05161	9636	ISG15	14151-4	SL015510	0.270781	0.136237	1.98758	0.267024	0.537805	0.00375682	292	0.046991	0.322951	0.568288
Plexin-A4	PLXA4	Q9HCM2	91584	PLXNA4	19560-23	SL021489	0.263524	0.132889	1.98305	0.260461	0.523986	0.00306269	292	0.0470364	0.296531	0.544547
Ras-related protein Rab-2A	RAB2A	P61019	5862	RAB2A	16857-2	SL008705	0.282301	0.14241	1.98232	0.279123	0.561425	0.003178	292	0.0471543	0.228215	0.477718
Growth arrest-specific protein 7	GAS7	O60861	8522	GAS7	17721-82	SL004797	0.211196	0.10646	1.98381	0.208661	0.419857	0.00253489	292	0.0471958	0.469509	0.685207
Malate dehydrogenase, cytoplasmic	MDHC	P40925	4190	MDH1	3853-56	SL008102	0.297406	0.150046	1.9821	0.29409	0.591496	0.00331562	292	0.047235	0.18272	0.427458
Hypoxanthine-guanine phosphoribosyltransferase	HPRT	P00492	3251	HPRT1	19290-5	SL008856	0.292112	0.147582	1.97932	0.289261	0.581373	0.00285116	292	0.0474427	0.14727	0.383757
Interleukin-17D	IL-17D	Q8TAD2	53342	IL17D	4136-40	SL004353	-0.231353	0.116874	-1.97952	0.229072	-0.00228098	-0.460425	292	0.0475163	0.489019	0.699299
Connective tissue growth factor	CTGF	P29279	1490	CTGF	2975-19	SL002655	0.278097	0.140512	1.97916	0.275404	0.553501	0.00269237	292	0.047607	0.274036	0.523485
Translationally-controlled tumor protein	TCTP	P13693	7178	TPT1	3872-2	SL005679	0.296791	0.150055	1.97788	0.294107	0.590898	0.00268323	292	0.0477211	0.126846	0.356155
Glutaredoxin-2, mitochondrial	GLRX2	Q9NS18	51022	GLRX2	12486-8	SL007708	0.29078	0.147155	1.97602	0.288423	0.579204	0.00235727	292	0.0478347	0.173761	0.416847
Cytochrome c oxidase subunit 5A, mitochondrial	COX5A	P20674	9377	COX5A	18226-148	SL005676	0.298538	0.151116	1.97555	0.296188	0.594726	0.00235031	292	0.0478363	0.12761	0.357225
Omega-amidase NIT2	NIT2	Q9NQR4	56954	NIT2	17808-37	SL012948	0.287329	0.145376	1.97646	0.284937	0.572266	0.00239229	292	0.0478858	0.166857	0.408482
Cystatin-M	Cystatin M	Q15828	1474	CST6	14711-27	SL004438	0.23763	0.119968	1.98078	0.235137	0.472767	0.00249331	292	0.0479062	0.405891	0.637095
Acyl-CoA-binding protein	ACBP	P07108	1622	DBI	16919-1	SL008480	0.294769	0.149179	1.97594	0.292391	0.58716	0.00237779	292	0.048004	0.137357	0.370617
Neuroendocrine secretory protein 55	GNAS3	O95467	2778	GNAS	5757-45	SL017107	-0.246217	0.124223	-1.98206	0.243477	-0.00274001	-0.489694	292	0.0480416	0.411521	0.641499
N-terminal Xaa-Pro-Lys N-methyltransferase 1	NTM1A	Q9BV86		NTMT1	12454-105	SL019732	0.256899	0.129906	1.97757	0.254617	0.511516	0.0022829	292	0.0480429	0.429889	0.655659
Probable RNA-binding protein 19	RBM19	Q9Y4C8		RBM19	11468-15	SL019467	0.194617	0.0984694	1.97642	0.193	0.387617	0.00161728	292	0.0480599	0.628873	0.793015
Prefoldin subunit 5	PFD5	Q99471	5204	PFDN5	4271-75	SL006705	0.285348	0.144654	1.97263	0.283522	0.56887	0.00182668	292	0.0484099	0.212108	0.460552
Collagen alpha-1(XXVIII) chain	COSA1	Q2UY09	340267	COL28A1	10702-1	SL012521	0.183345	0.0929021	1.97353	0.182088	0.365433	0.00125659	292	0.0486454	0.620335	0.787614
Slit homolog 3 protein	SLIT3	O75094	6586	SLIT3	18931-40	SL011409	0.172849	0.0878497	1.96756	0.172186	0.345035	0.000663768	292	0.0486477	0.737664	0.858874
Plexin domain-containing protein 2	PXDC2	Q6UX71	84898	PLXDC2	11342-59	SL008729	0.287944	0.1464	1.96683	0.286944	0.574888	0.00099962	292	0.0488203	0.17774	0.421592
Apolipoprotein A-V	Apo A-V	Q6Q788	116519	APOA5	15363-32	SL004840	0.204702	0.103877	1.97061	0.203599	0.408301	0.00110254	292	0.0489198	0.631663	0.794772
Tumor necrosis factor receptor superfamily member 13C	BAFF Receptor	Q96RJ3	115650	TNFRSF13C	5383-14	SL004671	-0.248983	0.126486	-1.96847	0.247912	-0.00107126	-0.496895	292	0.0491865	0.32346	0.568735
Nucleolar protein 16	NOP16	Q9Y3C1	51491	NOP16	18228-30	SL021013	-0.261362	0.133063	-1.96419	0.260804	-0.000558113	-0.522166	292	0.0492126	0.385193	0.620639
Early activation antigen CD69	CD69	Q07108	969	CD69	16618-7	SL007370	0.262313	0.133611	1.96326	0.261878	0.52419	0.00043529	292	0.0492555	0.292735	0.54105
Latent-transforming growth factor beta-binding protein 4	LTBP4	Q8N2S1	8425	LTBP4	13133-73	SL007033	0.23092	0.117561	1.96425	0.23042	0.46134	0.000499471	292	0.049382	0.448037	0.669356
Beta-arrestin-1	ARRB1	P49407	408	ARRB1	12643-4	SL011195	0.286276	0.146036	1.96031	0.28623	0.572506	4.54745e-05	292	0.0496047	0.1481	0.384837
Calcineurin B homologous protein 1	CHP1	Q99653		CHP1	12458-79	SL016506	0.291716	0.148786	1.96064	0.291621	0.583337	9.47216e-05	292	0.0496049	0.176571	0.420204
Casein kinase II subunit alpha	CSK21	P68400	1457	CSNK2A1	3427-63	SL007324	0.294714	0.150277	1.96114	0.294543	0.589257	0.000171055	292	0.0496316	0.179596	0.423787
Collagen alpha-1(VI) chain	Collagen a1(VI)	P12109	1291	COL6A1	16828-8	SL002657	-0.147849	0.0752848	-1.96386	0.147558	-0.000290611	-0.295407	292	0.0496404	0.81878	0.904864
Angiopoietin-4	Angiopoietin-4	Q9Y264	51378	ANGPT4	2500-2	SL004643	0.281323	0.143728	1.95733	0.281707	0.56303	-0.000384308	292	0.0498044	0.236658	0.486475
Apelin	APEL	Q9ULZ1	8862	APLN	6622-90	SL011868	-0.254541	0.129833	-1.96052	0.254474	-6.73778e-05	-0.509015	292	0.0498957	0.298616	0.546458
Fatty acid-binding protein, liver	FABPL	P07148	2168	FABP1	11516-7	SL006131	-0.235067	0.120147	-1.95648	0.235489	0.000422473	-0.470556	292	0.0499971	0.447558	0.668998
Granulocyte-macrophage colony-stimulating factor receptor subunit alpha	CSF2R	P15509	1438	CSF2RA	10438-19	SL007128	-0.158868	0.0810849	-1.95928	0.158926	5.80827e-05	-0.317795	292	0.0500196	0.773719	0.879613
Tryptophan--tRNA ligase, cytoplasmic	SYWC	P23381	7453	WARS	9870-17	SL011183	0.262247	0.133936	1.95801	0.262514	0.524761	-0.000266684	292	0.0500215	0.324242	0.569423
Angiogenin	Angiogenin	P03950	283	ANG	4874-3	SL000003	0.170045	0.0866801	1.96176	0.169893	0.339938	0.000152179	292	0.0500687	0.601105	0.775309
Calsenilin	CSEN	Q9Y2W7	30818	KCNIP3	10513-13	SL018613	0.167537	0.0854172	1.96139	0.167418	0.334954	0.000118901	292	0.0501182	0.763122	0.873568
C-terminal-binding protein 1	CTBP1	Q13363	1487	CTBP1	11217-16	SL007405	0.279496	0.142984	1.95473	0.280249	0.559745	-0.000752924	292	0.0504274	0.182589	0.427304
Trinucleotide repeat-containing gene 6B protein	TNR6B	Q9UPQ9	23112	TNRC6B	9808-41	SL019134	0.294253	0.150751	1.95191	0.295473	0.589726	-0.00121976	292	0.0504304	0.170218	0.412574
V-type immunoglobulin domain-containing suppressor of T-cell activation	GI24	Q9H7M9		C10orf54	14123-34	SL017424	0.262907	0.134576	1.95359	0.26377	0.526677	-0.000862624	292	0.0505767	0.304933	0.552207
Baculoviral IAP repeat-containing protein 7 Isoform beta	Livin B	Q96CA5	79444	BIRC7	15504-39	SL004299	-0.212889	0.108709	-1.95834	0.213069	0.000180222	-0.425957	292	0.0507685	0.584429	0.76448
Methionine-R-sulfoxide reductase B2, mitochondrial	MSRB2	Q9Y3D2		MSRB2	16877-19	SL019317	0.254467	0.130569	1.94891	0.255916	0.510383	-0.00144802	292	0.0508905	0.363817	0.603172
WNT1-inducible-signaling pathway protein 2	WISP-2	O76076	8839	WISP2	6392-7	SL004674	0.255125	0.130524	1.95462	0.255826	0.510951	-0.000701715	292	0.0509091	0.291779	0.540166
Transmembrane protein 132C	T132C	Q8N3T6	92293	TMEM132C	11128-29	SL018134	0.181645	0.0931996	1.94899	0.182671	0.364316	-0.00102654	292	0.0509707	0.701319	0.837448
Glycoprotein hormone alpha-2	GPHA2	Q96T91	170589	GPHA2	6395-58	SL012797	0.226592	0.116101	1.95168	0.227557	0.454149	-0.000965787	292	0.0511002	0.45022	0.670984
					14256-4		0.176183	0.0904454	1.94795	0.177273	0.353456	-0.00108979	292	0.0511031	0.726879	0.852572
26S proteasome non-ATPase regulatory subunit 9	PSMD9	O00233	5715	PSMD9	13931-22	SL012980	0.253861	0.130023	1.95243	0.254845	0.508705	-0.000984122	292	0.0511376	0.121445	0.34849
Proteasome subunit alpha type-4	PSA4	P25789	5685	PSMA4	14099-20	SL009468	0.218195	0.111241	1.96145	0.218033	0.436228	0.000161642	292	0.0515582	0.604084	0.777229
					8316-36		0.168244	0.0866109	1.94253	0.169757	0.338002	-0.00151336	292	0.0515691	0.731494	0.855274
Mitogen-activated protein kinase 12	MK12	P53778	6300	MAPK12	5005-4	SL007281	0.258697	0.13298	1.94539	0.26064	0.519337	-0.00194339	292	0.051661	0.312578	0.559087
Interleukin-12 receptor subunit beta-1	IL-12 Rb1	P42701	3594	IL12RB1	2632-5	SL004148	-0.253577	0.130522	-1.9428	0.255823	0.00224521	-0.5094	292	0.0516965	0.380427	0.616788
Vesicle-trafficking protein SEC22a	SC22A	Q96IW7		SEC22A	13713-164	SL020224	0.275427	0.141972	1.94002	0.278264	0.553692	-0.002837	292	0.0518166	0.255771	0.505738
Transmembrane protein 132D	T132D	Q14C87		TMEM132D	13416-8	SL020086	0.209422	0.107836	1.94205	0.211358	0.42078	-0.00193554	292	0.0518392	0.574856	0.758193
Arfaptin-1	ARFP1	P53367	27236	ARFIP1	13488-3	SL020128	0.28586	0.147224	1.94166	0.28856	0.57442	-0.00269973	292	0.0519737	0.168024	0.409907
Integral membrane protein 2A	ITM2A	O43736	9452	ITM2A	7765-15	SL000672	-0.266669	0.137484	-1.93964	0.269468	0.0027986	-0.536137	292	0.0519776	0.204612	0.452341
Thioredoxin	Thioredoxin	P10599	7295	TXN	8813-160	SL000585	0.204503	0.105254	1.94296	0.206297	0.4108	-0.00179368	292	0.0520131	0.608696	0.780189
TATA-box-binding protein	TBP	P20226	6908	TBP	2875-15	SL006923	-0.25177	0.129631	-1.94221	0.254076	0.00230654	-0.505846	292	0.0520958	0.397942	0.630826
Proteasome subunit alpha type-1	PSA1	P25786	5682	PSMA1	3859-50	SL010973	0.267495	0.137913	1.93959	0.27031	0.537805	-0.00281531	292	0.0521109	0.291804	0.540189
Transmembrane protein 132B	T132B	Q14DG7	114795	TMEM132B	8890-9	SL018697	0.20869	0.10749	1.94148	0.21068	0.41937	-0.0019906	292	0.0521555	0.5949	0.771298
AP-2 complex subunit alpha-2	AP2A2	O94973	161	AP2A2	13621-31	SL020199	0.305767	0.157533	1.94097	0.308765	0.614533	-0.00299795	292	0.0521795	0.0460522	0.214598
Inorganic pyrophosphatase	PPase	Q15181	5464	PPA1	5021-13	SL004914	0.278472	0.143694	1.93795	0.28164	0.560112	-0.00316774	292	0.0522168	0.214048	0.462653
Histone-lysine N-methyltransferase SETMAR	SETMR	Q53H47		SETMAR	12462-20	SL019733	-0.205945	0.106273	-1.93789	0.208294	0.00234972	-0.414239	292	0.0522404	0.606417	0.778728
Serpin B13	SPB13	Q9UIV8	5275	SERPINB13	18841-1	SL008432	0.22823	0.117526	1.94196	0.230351	0.458581	-0.00212065	292	0.0522688	0.47484	0.689086
Protocadherin beta-10	PCDBA	Q9UN67	56126	PCDHB10	9963-19	SL019221	0.20364	0.105134	1.93696	0.206063	0.409703	-0.00242279	292	0.0523247	0.585212	0.764991
Transmembrane protein 106A	T106A	Q96A25	113277	TMEM106A	10499-1	SL008733	0.242356	0.125136	1.93674	0.245268	0.487624	-0.00291125	292	0.0524974	0.402694	0.634581
No protein	No Protein				2057-6	SL011608	-0.257291	0.132724	-1.93854	0.26014	0.00284877	-0.517431	292	0.0525596	0.306125	0.553286
ADP-ribosyl cyclase/cyclic ADP-ribose hydrolase 1	CD38	P28907	952	CD38	11513-92	SL002722	0.223145	0.115278	1.93571	0.225945	0.449089	-0.00280004	292	0.0526379	0.534918	0.731381
UBX domain-containing protein 4	UBXN4	Q92575	23190	UBXN4	9997-12	SL019215	0.300647	0.155419	1.93443	0.304621	0.605268	-0.00397388	292	0.0526908	0.0754284	0.274642
Vitrin	VITRN	Q6UXI7	5212	VIT	6234-74	SL012611	0.20579	0.10642	1.93375	0.208583	0.414373	-0.00279352	292	0.0527938	0.429313	0.65522
Beta-1,4-galactosyltransferase 6	B4GT6	Q9UBX8	9331	B4GALT6	10832-24	SL018597	0.20114	0.10422	1.92997	0.204271	0.405411	-0.00313019	292	0.0530873	0.548758	0.740782
GTP-binding protein GEM	GEM	P55040		GEM	12817-1	SL019954	-0.18786	0.0971323	-1.93407	0.190379	0.00251881	-0.37824	292	0.0532105	0.588805	0.767336
Bone marrow stromal antigen 2	BST-2	Q10589	684	BST2	8832-55	SL001906	0.22543	0.116721	1.93136	0.228773	0.454202	-0.00334297	292	0.0533262	0.525929	0.72521
Amyloid beta A4 precursor protein-binding family B member 2	APBB2	Q92870	323	APBB2	12761-12	SL007583	0.191367	0.0991503	1.93007	0.194335	0.385702	-0.00296773	292	0.0537406	0.653867	0.80862
Low-density lipoprotein receptor-related protein 4	LRP4	O75096	4038	LRP4	19558-10	SL007029	0.19306	0.100012	1.93038	0.196023	0.389083	-0.00296276	292	0.053746	0.620688	0.787837
Eukaryotic translation initiation factor 3 subunit G	EIF3G	O75821	8666	EIF3G	11454-87	SL012996	0.30014	0.155882	1.92543	0.305529	0.605669	-0.00538856	292	0.0539299	0.0788979	0.280888
Transcription factor A, mitochondrial	TFAM	Q00059	7019	TFAM	9952-57	SL016054	0.292005	0.151779	1.92389	0.297486	0.589492	-0.00548089	292	0.0539553	0.117572	0.342888
UDP-glucuronosyltransferase 1-1	UGT 1A1	P22309	54658	UGT1A1	17702-53	SL000606	0.254335	0.132211	1.9237	0.259134	0.51347	-0.00479906	292	0.0539824	0.295559	0.543654
Apolipoprotein L1	Apo L1	O14791	8542	APOL1	9506-10	SL005699	0.166382	0.0865469	1.92245	0.169632	0.336014	-0.0032502	292	0.0541183	0.712701	0.844216
Phosphatidylethanolamine-binding protein 1	prostatic binding protein	P30086	5037	PEBP1	4276-10	SL005358	0.294791	0.153162	1.9247	0.300197	0.594989	-0.00540587	292	0.0541358	0.151952	0.38981
Sulfotransferase 1C2	ST1C2	O00338	6819	SULT1C2	17811-78	SL014570	-0.23639	0.122989	-1.92205	0.241058	0.00466804	-0.477448	292	0.0541616	0.416697	0.645521
VIP36-like protein	LMA2L	Q9H0V9	81562	LMAN2L	8013-9	SL016518	0.282729	0.147072	1.92238	0.288261	0.57099	-0.00553213	292	0.05423	0.189564	0.435389
DnaJ homolog subfamily C member 11	DJC11	Q9NVH1	55735	DNAJC11	9783-75	SL019128	-0.212737	0.110508	-1.92509	0.216595	0.0038581	-0.429332	292	0.0543651	0.57536	0.758525
Osteocrin	OSTN	P61366	344901	OSTN	7265-32	SL008892	0.225854	0.117446	1.92304	0.230195	0.456048	-0.00434121	292	0.0543655	0.524913	0.724509
Thiamin pyrophosphokinase 1	TPK1	Q9H3S4		TPK1	12018-84	SL019230	0.259243	0.134887	1.92193	0.264378	0.523621	-0.00513506	292	0.0543683	0.321503	0.567012
Proto-oncogene tyrosine-protein kinase Src	p60-Src	P12931	6714	SRC	15433-4	SL005268	0.290733	0.151427	1.91995	0.296797	0.58753	-0.00606435	292	0.0544548	0.117541	0.342843
Semaphorin-4B	SEM4B	Q9NPR2	10509	SEMA4B	9805-51	SL009047	0.214512	0.111732	1.91988	0.218994	0.433506	-0.00448273	292	0.0545429	0.39316	0.627025
Lumican	Lumican	P51884	4060	LUM	13114-50	SL006230	0.205544	0.106838	1.92389	0.209402	0.414945	-0.00385822	292	0.054592	0.518713	0.720217
Activator of apoptosis harakiri	HRK	O00198	8739	HRK	8008-28	SL006958	-0.247087	0.128619	-1.92108	0.252093	0.00500579	-0.499181	292	0.0546215	0.360823	0.600686
Acetylcholinesterase	ACES	P22303	43	ACHE	15553-22	SL007155	0.206918	0.107781	1.9198	0.211251	0.418169	-0.00433295	292	0.0546885	0.598034	0.773326
Calcium uptake protein 2, mitochondrial	EFHA1	Q8IYU8	221154	EFHA1	6226-69	SL017253	0.289402	0.150894	1.91792	0.295752	0.585154	-0.00634912	292	0.0547159	0.135338	0.367883
MAX gene-associated protein	MGAP	Q8IWI9		MGA	11587-5	SL019521	-0.224891	0.116986	-1.92237	0.229293	0.00440265	-0.454184	292	0.0548129	0.414512	0.643826
Thioredoxin-dependent peroxide reductase, mitochondrial	Peroxiredoxin-3	P30048	10935	PRDX3	8358-30	SL005000	0.290646	0.151623	1.9169	0.297181	0.587827	-0.00653463	292	0.0548808	0.126644	0.35587
Beta-1,3-glucosyltransferase	B3GLT	Q6Y288	145173	B3GALTL	5727-35	SL017109	0.260492	0.135707	1.91952	0.265985	0.526478	-0.00549311	292	0.0549541	0.273498	0.52297
Maspardin	SPG21	Q9NZD8		SPG21	11122-97	SL019337	0.292825	0.152774	1.91672	0.299437	0.592262	-0.0066117	292	0.0550492	0.134042	0.366117
Oligophrenin-1	Oligophrenin-1	O60890	4983	OPHN1	12591-27	SL002050	0.284364	0.148552	1.91424	0.291161	0.575525	-0.00679731	292	0.055078	0.17895	0.423025
BRISC complex subunit Abro1	F175B	Q15018	23172	FAM175B	8945-7	SL018680	0.265109	0.138471	1.91454	0.271403	0.536512	-0.00629463	292	0.0551453	0.264473	0.514269
Medium-chain specific acyl-CoA dehydrogenase, mitochondrial	ACADM	P11310	34	ACADM	17333-20	SL008026	0.280716	0.14662	1.91459	0.287374	0.56809	-0.00665873	292	0.0552169	0.180855	0.42527
Immunoglobulin superfamily member 3	IGSF3	O75054	3321	IGSF3	9715-15	SL019112	-0.228713	0.119591	-1.91247	0.234398	0.00568449	-0.463111	292	0.0554571	0.492405	0.701716
Dihydropyrimidinase-related protein 3	DPYL3	Q14195	1809	DPYSL3	12707-26	SL008196	0.287342	0.150318	1.91156	0.294624	0.581966	-0.00728197	292	0.0555745	0.127995	0.357764
Ubiquitin-conjugating enzyme E2 R1	UB2R1	P49427	997	CDC34	12532-28	SL013788	0.216708	0.113077	1.91646	0.221631	0.438339	-0.00492373	292	0.0558125	0.532903	0.730002
Protein disulfide-isomerase A3	Protein disulfide isomerase A3	P30101	2923	PDIA3	4719-58	SL003524	0.283552	0.148669	1.90727	0.291391	0.574943	-0.00783951	292	0.0560089	0.140989	0.375485
CMRF35-like molecule 6	CLM6	Q08708	10871	CD300C	5066-134	SL014270	-0.124518	0.0653002	-1.90685	0.127988	0.00347069	-0.252506	292	0.0561934	0.859981	0.927352
Tubulin--tyrosine ligase	TTL	Q8NG68		TTL	13973-62	SL020271	0.289881	0.152007	1.90702	0.297934	0.587816	-0.00805297	292	0.0562139	0.137516	0.370832
Dipeptidyl peptidase 2	DPP2	Q9UHL4	29952	DPP7	8346-9	SL008916	0.258756	0.135814	1.90523	0.266195	0.524951	-0.00743912	292	0.0564249	0.289332	0.537896
Transmembrane protein 70, mitochondrial	TMM70	Q9BUB7	54968	TMEM70	8074-32	SL018405	0.12263	0.0643566	1.90548	0.126139	0.248769	-0.00350873	292	0.0565148	0.871619	0.933605
DNA dC->dU-editing enzyme APOBEC-3G	ABC3G	Q9HC16	60489	APOBEC3G	13930-3	SL007678	0.286196	0.150343	1.90361	0.294673	0.580869	-0.00847712	292	0.0566011	0.137974	0.371448
Sodium- and chloride-dependent neutral and basic amino acid transporter B(0+)	S6A14	Q9UN76	11254	SLC6A14	13053-6	SL015342	-0.244279	0.128279	-1.90428	0.251427	0.00714801	-0.495707	292	0.0566839	0.30669	0.553796
Guanylate cyclase activator 2B	GUC2B	Q16661	2981	GUCA2B	6223-5	SL008392	0.21372	0.111844	1.91087	0.219215	0.432935	-0.00549486	292	0.056684	0.514864	0.71754
Sulfatase-modifying factor 2	SUMF2	Q8NBJ7	25870	SUMF2	6069-71	SL012703	-0.23434	0.123085	-1.90389	0.241246	0.00690612	-0.475587	292	0.0567095	0.419187	0.647446
Carbonic anhydrase 5A, mitochondrial	Carbonic Anhydrase VA	P35218	763	CA5A	8791-151	SL010448	0.206644	0.108599	1.90281	0.212855	0.419498	-0.00621081	292	0.0568361	0.5932	0.770195
A disintegrin and metalloproteinase with thrombospondin motifs 15	ATS15	Q8TE58	170689	ADAMTS15	4533-76	SL012740	-0.267841	0.140773	-1.90265	0.275915	0.0080737	-0.543756	292	0.0568635	0.250613	0.500613
Mitogen-activated protein kinase 14	MAPK14	Q16539	1432	MAPK14	5007-1	SL006920	0.288199	0.151628	1.90069	0.297192	0.58539	-0.00899296	292	0.0569536	0.0965862	0.310783
Peptidyl-tRNA hydrolase 2, mitochondrial	PTH2	Q9Y3E5		PTRH2	16887-29	SL017474	0.250949	0.132171	1.89866	0.259056	0.510004	-0.00810717	292	0.0570086	0.381012	0.617262
Synaptotagmin-2	SYT2	Q8N9I0	127833	SYT2	9577-26	SL019020	-0.183658	0.0967496	-1.89828	0.189629	0.00597107	-0.373287	292	0.0571358	0.659823	0.812295
Protein FAM24B	FA24B	Q8N5W8	196792	FAM24B	8775-61	SL018676	-0.219862	0.115603	-1.90188	0.226582	0.00671924	-0.446444	292	0.0571785	0.470219	0.685725
Uncharacterized protein C1orf43	CA043	Q9BWL3	25912	C1orf43	6937-251	SL017975	0.217842	0.114771	1.89806	0.22495	0.442792	-0.00710854	292	0.0575282	0.557122	0.746406
Neuferricin	NEUFC	Q8WUJ1	124936	CYB5D2	10924-258	SL018077	0.199209	0.105007	1.8971	0.205814	0.405024	-0.00660515	292	0.0575782	0.588556	0.767174
Insulin gene enhancer protein ISL-1	ISL1	P61371	3670	ISL1	11549-6	SL007314	0.23426	0.123437	1.89782	0.241936	0.476196	-0.00767553	292	0.0577639	0.444537	0.666736
Platelet basic protein	PBP	P02775	5473	PPBP	16765-52	SL004294	0.241971	0.127719	1.89456	0.250329	0.4923	-0.00835767	292	0.0578654	0.419709	0.647849
Cell division control protein 42 homolog	Cdc42Hs	P60953	998	CDC42	9840-2	SL000350	0.290595	0.153467	1.89353	0.300796	0.591391	-0.0102004	292	0.0579003	0.110341	0.332176
Carbonic anhydrase 1	Carbonic anhydrase I	P00915	759	CA1	4969-2	SL004866	0.229321	0.12093	1.89631	0.237022	0.466343	-0.00770151	292	0.0579055	0.160712	0.40089
Dual specificity phosphatase 28	DUS28	Q4G0W2	285193	DUSP28	9940-35	SL019220	0.267566	0.141359	1.89281	0.277063	0.544629	-0.00949749	292	0.0580921	0.18634	0.431672
Conserved oligomeric Golgi complex subunit 8	COG8	Q96MW5	84342	COG8	9543-131	SL019061	0.192339	0.10136	1.89757	0.198666	0.391005	-0.00632759	292	0.0581119	0.650593	0.806594
Peroxisomal membrane protein PEX14	PEX14	O75381	5195	PEX14	8300-82	SL018446	0.266607	0.140887	1.89234	0.276138	0.542745	-0.00953171	292	0.0582566	0.253367	0.503356
B-cell lymphoma 6 protein	BCL6	P41182	604	BCL6	13111-79	SL007223	0.206216	0.109025	1.89144	0.21369	0.419905	-0.0074744	292	0.0583818	0.508068	0.712789
Torsin-1A-interacting protein 2	TOIP2	Q8NFQ8	163590	TOR1AIP2	10553-8	SL017988	0.268478	0.141917	1.89179	0.278158	0.546636	-0.00967959	292	0.0583936	0.244053	0.494017
Small nuclear ribonucleoprotein G	RUXG	P62308	6637	SNRPG	19276-124	SL013061	0.292419	0.154684	1.89043	0.303181	0.5956	-0.0107618	292	0.0586509	0.101797	0.319056
Ectonucleotide pyrophosphatase/phosphodiesterase family member 6	ENPP6	Q6UWR7	133121	ENPP6	15579-26	SL008780	-0.182249	0.0965188	-1.88823	0.189177	0.0069274	-0.371426	292	0.0586969	0.660835	0.812918
Cyclin-A1	CCNA1	P78396	8900	CCNA1	15319-226	SL013808	-0.242318	0.128244	-1.8895	0.251359	0.00904142	-0.493677	292	0.0588427	0.433381	0.658317
Translocon-associated protein subunit alpha	SSRA	P43307	6745	SSR1	8106-15	SL015513	-0.177266	0.0938752	-1.88831	0.183995	0.00672968	-0.361261	292	0.0588803	0.578347	0.760491
Triggering receptor expressed on myeloid cells 1	sTREM-1	Q9NP99	54210	TREM1	9266-1	SL004968	0.18091	0.0955956	1.89245	0.187367	0.368278	-0.00645729	292	0.0590104	0.597436	0.77294
Neural cell adhesion molecule 2	NCAM2	O15394	4685	NCAM2	6507-16	SL006401	0.230347	0.122254	1.88417	0.239618	0.469965	-0.00927063	292	0.0592916	0.416354	0.645255
Leukemia inhibitory factor receptor	LIF sR	P42702	3977	LIFR	5837-49	SL004714	-0.233271	0.12381	-1.88411	0.242667	0.00939634	-0.475939	292	0.0593619	0.424405	0.651464
Ras-related protein Rab-18	RAB18	Q9NP72	22931	RAB18	12945-33	SL013869	0.247503	0.13121	1.88631	0.257172	0.504675	-0.0096692	292	0.0595077	0.301333	0.548938
Lactoperoxidase	PERL	P22079	4025	LPO	4801-13	SL007153	-0.193302	0.102665	-1.88285	0.201223	0.00792101	-0.394525	292	0.0595426	0.663181	0.814359
Zinc finger protein 415	ZN415	Q09FC8		ZNF415	12811-55	SL019912	-0.207046	0.110102	-1.8805	0.215799	0.00875362	-0.422845	292	0.0598066	0.490851	0.700607
Carnitine O-acetyltransferase	CACP	P43155		CRAT	12637-7	SL019832	0.285923	0.15217	1.87897	0.298254	0.584177	-0.012331	292	0.0598125	0.10767	0.328131
					9373-405		-0.232922	0.12386	-1.88052	0.242766	0.00984396	-0.475689	292	0.0598857	0.39462	0.628188
Glucose-6-phosphate 1-dehydrogenase	G6PD	P11413	2539	G6PD	19297-4	SL007111	0.287701	0.153129	1.87881	0.300134	0.587834	-0.0124331	292	0.0599241	0.106844	0.32687
O-phosphoseryl-tRNA(Sec) selenium transferase	SPCS	Q9HD40	51091	SEPSECS	17357-33	SL020889	0.236447	0.125989	1.87673	0.246938	0.483385	-0.0104906	292	0.0599475	0.423596	0.650843
Ephrin-B2	EFNB2	P52799	1948	EFNB2	14131-37	SL007274	0.220248	0.116902	1.88404	0.229129	0.449377	-0.00888017	292	0.0600018	0.445568	0.667509
IgLON family member 5	IGLO5	A6NGN9	402665	IGLON5	6478-2	SL017460	0.215759	0.114872	1.87826	0.225148	0.440907	-0.00938923	292	0.0600604	0.505377	0.710899
Eukaryotic translation initiation factor 3 subunit J	EIF3J	O75822		EIF3J	13497-34	SL020138	0.282194	0.150379	1.87655	0.294743	0.576937	-0.0125491	292	0.0602537	0.144467	0.380089
Mitochondrial coiled-coil domain protein 1	MCCD1	P59942	401250	MCCD1	8032-23	SL018377	0.224957	0.119806	1.87768	0.23482	0.459777	-0.00986294	292	0.0603679	0.515259	0.717816
SWI/SNF complex subunit SMARCC1	SMRC1	Q92922		SMARCC1	11180-17	SL019318	0.198617	0.105725	1.87861	0.207222	0.405838	-0.00860546	292	0.0605483	0.607677	0.779537
Plastin-1	PLSI	Q14651	5357	PLS1	12737-12	SL015520	0.22509	0.120206	1.87254	0.235603	0.460694	-0.010513	292	0.0605817	0.479716	0.692616
Testican-3	TICN3	Q9BQ16	50859	SPOCK3	9906-21	SL012805	0.211707	0.112694	1.87861	0.220879	0.432587	-0.00917215	292	0.0606945	0.554858	0.744888
Laminin subunit alpha-4	LAMA4	Q16363	3910	LAMA4	6577-64	SL008212	0.241648	0.128805	1.87607	0.252458	0.494107	-0.0108103	292	0.0607786	0.374839	0.612241
Tolloid-like protein 1	TLL1	O43897	7092	TLL1	6383-90	SL012368	-0.223281	0.119303	-1.87155	0.233834	0.0105527	-0.457115	292	0.060806	0.404578	0.636065
BMP and activin membrane-bound inhibitor homolog	BAMBI	Q13145	25805	BAMBI	8811-24	SL007393	0.170798	0.0909572	1.87778	0.178276	0.349074	-0.00747843	292	0.0608516	0.641325	0.800828
Acyl-coenzyme A thioesterase 8	ACOT8	O14734	10005	ACOT8	17400-71	SL019729	0.258312	0.137952	1.87248	0.270386	0.528698	-0.0120742	292	0.0608572	0.29434	0.542532
Serum amyloid A-1 protein	SAA	P0DJI8	6288	SAA1	15515-2	SL000572	-0.216157	0.115428	-1.87266	0.226238	0.0100816	-0.442395	292	0.0612218	0.484908	0.696353
					8029-35		-0.21012	0.112597	-1.86613	0.220689	0.0105692	-0.43081	292	0.0612506	0.504906	0.710567
Interferon lambda receptor 1	CRF2-12	Q8IU57	163702	IFNLR1	7192-37	SL004524	-0.213086	0.113978	-1.86954	0.223397	0.0103105	-0.436483	292	0.0613922	0.565705	0.752133
Cob(I)yrinic acid a,c-diamide adenosyltransferase, mitochondrial	MMAB	Q96EY8	326625	MMAB	17783-9	SL020955	0.263934	0.14137	1.86698	0.277085	0.541019	-0.0131509	292	0.0614479	0.213497	0.462057
TBC1 domain family member 5	TBCD5	Q92609	9779	TBC1D5	9960-2	SL019203	0.285321	0.152813	1.86712	0.299514	0.584835	-0.0141939	292	0.0615238	0.100895	0.31764
V-set and immunoglobulin domain-containing protein 2	VSIG2	Q96IQ7	23584	VSIG2	8018-43	SL018397	0.201924	0.108069	1.86848	0.211814	0.413738	-0.00989063	292	0.061543	0.568345	0.753886
SHC-transforming protein 1	SHC1	P29353	6464	SHC1	16043-30	SL014469	0.286882	0.153714	1.86633	0.30128	0.588162	-0.0143983	292	0.0616304	0.119135	0.34516
					8078-15		0.160118	0.0856733	1.86894	0.16792	0.328037	-0.00780181	292	0.0616978	0.741952	0.861366
Rho guanine nucleotide exchange factor 2	ARHG2	Q92974	9181	ARHGEF2	12848-9	SL019951	-0.235796	0.126056	-1.87057	0.247069	0.0112728	-0.482865	292	0.0617509	0.320308	0.565958
					10962-46		0.187079	0.100289	1.8654	0.196567	0.383646	-0.00948778	292	0.0617691	0.630985	0.794346
Rho GTPase-activating protein 5	RHG05	Q13017		ARHGAP5	14748-31	SL020313	0.276128	0.148073	1.8648	0.290224	0.566352	-0.0140961	292	0.0617783	0.156751	0.395917
Transcription regulator protein BACH1	BACH1	O14867		BACH1	12451-62	SL018858	0.250624	0.134374	1.86513	0.263372	0.513997	-0.0127476	292	0.0620748	0.373936	0.611503
Caspase recruitment domain-containing protein 19	BINCA	Q96LW7	84270	C9orf89	7778-104	SL018264	-0.241699	0.12958	-1.86525	0.253978	0.0122781	-0.495677	292	0.0621399	0.346674	0.58879
Apolipoprotein M	ApoM	O95445	55937	APOM	10445-20	SL004747	0.206311	0.11036	1.86944	0.216305	0.422616	-0.00999472	292	0.062207	0.49337	0.702403
C3a anaphylatoxin	C3a	P01024	718	C3	4900-8	SL000313	0.235345	0.126328	1.86296	0.247604	0.482948	-0.012259	292	0.0622405	0.146137	0.382278
Quinone oxidoreductase-like protein 1	QORL1	O95825	9946	CRYZL1	9207-60	SL018887	-0.199372	0.107124	-1.86113	0.209963	0.0105911	-0.409335	292	0.0622474	0.556371	0.745903
Lymphocyte antigen 6 complex locus protein G6d	LY66D	O95868	58530	LY6G6D	6469-62	SL012398	-0.183216	0.0983245	-1.86338	0.192716	0.00950016	-0.375932	292	0.0624188	0.626465	0.791496
Netrin-1	NET1	O95631	9423	NTN1	6649-51	SL012395	-0.154885	0.0832702	-1.86003	0.16321	0.00832416	-0.318095	292	0.0625656	0.63493	0.796825
Cytosolic purine 5'-nucleotidase	5NTC	P49902	22978	NT5C2	11288-26	SL019349	0.296016	0.159326	1.85793	0.312278	0.608294	-0.0162624	292	0.0628915	0.0782152	0.27967
Integrin beta-7	Integrin beta-7	P26010	3695	ITGB7	11205-10	SL004571	-0.196057	0.10565	-1.85572	0.207074	0.0110171	-0.403131	292	0.0629131	0.606551	0.778814
Interferon regulatory factor 4	IRF4	Q15306	3662	IRF4	19564-61	SL007438	0.177436	0.0956204	1.85563	0.187416	0.364852	-0.00998027	292	0.0629345	0.602394	0.77614
Serpin H1	Collagen-binding protein	P50454	871	SERPINH1	10800-15	SL003668	0.257851	0.138901	1.85637	0.272246	0.530097	-0.0143941	292	0.0630006	0.185013	0.430131
Keratin, type I cytoskeletal 20	Keratin 20	P35900	54474	KRT20	12975-11	SL002694	-0.198624	0.107167	-1.85341	0.210047	0.011423	-0.408671	292	0.0630251	0.530345	0.728248
High affinity cGMP-specific 3',5'-cyclic phosphodiesterase 9A	PDE9A	O76083	5152	PDE9A	5201-50	SL016554	0.182284	0.0981811	1.85661	0.192435	0.374719	-0.0101512	292	0.0633462	0.65035	0.806443
Calcium-activated chloride channel regulator 1	CaCC	A8K7I4	1179	CLCA1	10496-11	SL009322	0.188218	0.101516	1.85407	0.198971	0.387188	-0.0107531	292	0.0635157	0.64918	0.805717
Focal adhesion kinase 1	FAK1	Q05397	5747	PTK2	4986-59	SL012248	-0.219721	0.118835	-1.84896	0.232916	0.0131951	-0.452637	292	0.0639168	0.474841	0.689087
Leukotriene A-4 hydrolase	LKHA4	P09960	4048	LTA4H	3204-2	SL007100	0.245302	0.132492	1.85144	0.259684	0.504986	-0.0143827	292	0.0639267	0.279178	0.528373
V-type immunoglobulin domain-containing suppressor of T-cell activation	GI24	Q9H7M9		C10orf54	11531-24	SL017424	0.260022	0.140537	1.85021	0.275453	0.535475	-0.0154302	292	0.0640451	0.242059	0.491995
Prostaglandin reductase 3	ZADH2	Q8N4Q0		ZADH2	17345-12	SL020272	0.282358	0.152778	1.84817	0.299444	0.581802	-0.0170857	292	0.0640802	0.105454	0.324737
Alpha-1B-glycoprotein	Alpha-1B-glycoprotein	P04217	1	A1BG	16561-9	SL005720	-0.189437	0.10246	-1.84889	0.200822	0.0113846	-0.390259	292	0.0640894	0.581591	0.762621
Tumor necrosis factor ligand superfamily member 8	CD30 Ligand	P32971	944	TNFSF8	3421-54	SL004635	-0.179216	0.0969349	-1.84883	0.189992	0.0107761	-0.369209	292	0.0641173	0.685989	0.828244
cAMP-dependent protein kinase type I-beta regulatory subunit	KAP1	P31321	5575	PRKAR1B	12479-50	SL014768	0.222034	0.120083	1.84901	0.235362	0.457396	-0.0133283	292	0.0643594	0.500128	0.707197
Beta-1-syntrophin	SNTB1	Q13884	6641	SNTB1	9078-207	SL011219	0.279219	0.151214	1.84652	0.296379	0.575598	-0.0171595	292	0.0643951	0.11048	0.332385
Hexokinase-3	HXK3	P52790	3101	HK3	19518-12	SL007273	0.229739	0.124275	1.84863	0.24358	0.473319	-0.0138408	292	0.0645298	0.433308	0.658262
Neuromedin-U	NMU	P48645	10874	NMU	8754-5	SL007247	-0.205755	0.11124	-1.84964	0.218031	0.0122766	-0.423786	292	0.0645631	0.567873	0.753573
Calreticulin	calreticulin	P27797	811	CALR	5264-65	SL003520	0.199346	0.108132	1.84355	0.211938	0.411285	-0.0125918	292	0.0645803	0.612843	0.782843
Cyclin-dependent kinase 2:Cyclin-A2 complex	CDK2/cyclin A	P24941 P20248	1017 890	CDK2 CCNA2	3357-67	SL010495	-0.231992	0.125726	-1.84523	0.246422	0.0144302	-0.478415	292	0.0648399	0.455248	0.674721
Fructose-bisphosphate aldolase A	aldolase A	P04075	226	ALDOA	5864-10	SL004910	0.286214	0.155232	1.84379	0.304254	0.590468	-0.0180399	292	0.0648775	0.0724662	0.269195
Transgelin	TAGL	Q01995	6876	TAGLN	15640-54	SL008169	0.206373	0.1119	1.84427	0.219324	0.425697	-0.0129506	292	0.0649156	0.32927	0.57382
Cardiotrophin-1	Cardiotrophin-1	Q16619	1489	CTF1	2889-37	SL002783	0.241321	0.131026	1.84178	0.256812	0.498133	-0.0154905	292	0.0653966	0.354316	0.595244
Protein tyrosine phosphatase type IVA 1	TP4A1	Q93096	7803	PTP4A1	17812-2	SL015125	0.183915	0.0998653	1.84163	0.195736	0.379651	-0.0118213	292	0.0656088	0.63974	0.799837
14-3-3 protein theta	14-3-3 protein theta	P27348	10971	YWHAQ	7625-27	SL008071	0.266487	0.145137	1.83611	0.284468	0.550955	-0.0179805	292	0.0656408	0.196426	0.4432
Sodium/potassium-transporting ATPase subunit beta-1	AT1B1	P05026	481	ATP1B1	13392-13	SL008814	-0.212884	0.115345	-1.84563	0.226076	0.0131923	-0.438961	292	0.0658302	0.50228	0.708717
gp41 C34 peptide, HIV	C34 gp41 HIV Fragment	Q70626		Human-virus	4792-51	SL016148	0.200355	0.10906	1.8371	0.213758	0.414114	-0.0134032	292	0.0658672	0.577183	0.759726
Apoptosis regulator Bcl-2	Bcl-2	P10415	596	BCL2	3412-7	SL000104	0.292826	0.159544	1.83539	0.312707	0.605533	-0.0198812	292	0.0658993	0.0854253	0.292276
Heat shock 70 kDa protein 1A	HSP 70	P0DMV8	3303	HSPA1A	6563-78	SL000451	-0.20572	0.112	-1.83678	0.219521	0.0138005	-0.425241	292	0.065913	0.57004	0.75501
Protachykinin-1	TKN1	P20366	6863	TAC1	9337-43	SL012423	0.176447	0.0960114	1.83777	0.188182	0.364629	-0.0117355	292	0.066024	0.661765	0.813489
Diphosphomevalonate decarboxylase	ERG19	P53602	4597	MVD	18422-41	SL013390	0.23323	0.126789	1.83951	0.248507	0.481737	-0.0152769	292	0.0661338	0.407639	0.638466
Sin3 histone deacetylase corepressor complex component SDS3	SDS3	Q9H7L9	64426	SUDS3	10703-203	SL006737	-0.203115	0.110528	-1.83768	0.216634	0.0135193	-0.419749	292	0.0661367	0.560979	0.748985
Cysteine--tRNA ligase, cytoplasmic	SYCC	P49589		CARS	14098-28	SL020309	0.278097	0.151519	1.83539	0.296977	0.575074	-0.0188802	292	0.0662515	0.153661	0.391996
Melanocortin-2 receptor accessory protein 2	MRAP2	Q96G30	112609	MRAP2	10889-2	SL017998	0.264252	0.144158	1.83307	0.282549	0.546801	-0.0182975	292	0.0663959	0.202365	0.44985
Keratin, type II cytoskeletal 1	Keratin-1	P04264	3848	KRT1	9931-20	SL005851	-0.214924	0.117323	-1.83191	0.229952	0.0150284	-0.444876	292	0.0666983	0.440212	0.663485
Interferon regulatory factor 1	IRF1	P10914	3659	IRF1	17462-19	SL007108	-0.219854	0.119983	-1.83237	0.235167	0.015313	-0.455021	292	0.0669956	0.464316	0.681407
Cyclin-dependent kinases regulatory subunit 1	CKS-1	P61024	1163	CKS1B	12530-14	SL005032	0.256822	0.140344	1.82994	0.275075	0.531897	-0.0182526	292	0.0670576	0.257735	0.507676
Down syndrome cell adhesion molecule	DSCAM	O60469	1826	DSCAM	9175-48	SL018891	-0.180868	0.0991253	-1.82464	0.194286	0.0134179	-0.375153	292	0.0673604	0.658598	0.81154
Ubiquitin carboxyl-terminal hydrolase 28	UBP28	Q96RU2	57646	USP28	19562-8	SL021216	0.211684	0.115986	1.82509	0.227332	0.439015	-0.015648	292	0.0674778	0.515541	0.718012
HLA class II histocompatibility antigen gamma chain	HG2A	P04233	972	CD74	8748-45	SL007076	0.233712	0.12802	1.82559	0.250919	0.484631	-0.017207	292	0.0677008	0.296174	0.544218
Protein max	MAX	P61244		MAX	12411-60	SL019679	0.288184	0.157926	1.8248	0.309535	0.597719	-0.0213512	292	0.0677273	0.0607257	0.246426
Syntaxin-12	STX12	Q86Y82	23673	STX12	10418-36	SL011111	0.270439	0.1482	1.82483	0.290472	0.560912	-0.0200327	292	0.0677508	0.157569	0.396949
Inositol-trisphosphate 3-kinase C	IP3KC	Q96DU7		ITPKC	12507-16	SL019723	-0.188087	0.10282	-1.82927	0.201528	0.0134412	-0.389615	292	0.0678767	0.611481	0.781973
Cold shock domain-containing protein C2	CSDC2	Q9Y534		CSDC2	12754-14	SL019899	0.196825	0.10797	1.82295	0.211622	0.408447	-0.0147968	292	0.0679567	0.566332	0.75255
3-phosphoinositide-dependent protein kinase 1	PDPK1	O15530	5170	PDPK1	4460-8	SL006998	0.279467	0.1534	1.82182	0.300664	0.580131	-0.0211976	292	0.067998	0.0987284	0.314211
Tudor-interacting repair regulator protein	SDOS	Q9BRJ7	84309	NUDT16L1	12497-29	SL015180	0.263412	0.144616	1.82146	0.283447	0.54686	-0.020035	292	0.0681333	0.168359	0.410316
GRB2-related adapter protein 2	GRB2-related adapter protein 2	O75791	9402	GRAP2	16074-12	SL005725	0.25443	0.13957	1.82296	0.273557	0.527987	-0.0191263	292	0.0681477	0.287779	0.53645
RAB6-interacting golgin	GORAB	Q5T7V8	92344	GORAB	7247-1	SL018123	0.214689	0.117512	1.82695	0.230324	0.445012	-0.0156351	292	0.0682103	0.50014	0.707206
Left-right determination factor 2	Lefty-A	O00292	7044	LEFTY2	15503-20	SL004647	0.167601	0.0921182	1.81941	0.180552	0.348152	-0.0129509	292	0.0683629	0.707455	0.841104
BTB/POZ domain-containing protein KCTD5	KCTD5	Q9NXV2	54442	KCTD5	12473-48	SL015285	-0.241989	0.133182	-1.81698	0.261038	0.0190482	-0.503027	292	0.068528	0.396759	0.629888
Mitochondrial import inner membrane translocase subunit TIM14	DnaJ homolog	Q96DA6	131118	DNAJC19	4545-53	SL006197	0.27236	0.149888	1.81709	0.293781	0.566141	-0.0214206	292	0.0685459	0.177136	0.420875
Ras-related protein Rab-22A	RB22A	Q9UL26	57403	RAB22A	12408-333	SL015330	0.271682	0.149354	1.81905	0.292734	0.564416	-0.0210519	292	0.0685717	0.135848	0.368575
N-lysine methyltransferase SMYD2	SMYD2	Q9NRG4		SMYD2	12636-113	SL019827	0.1991	0.10935	1.82076	0.214326	0.413427	-0.0152262	292	0.0686993	0.593484	0.770379
Leucine-rich repeat, immunoglobulin-like domain and transmembrane domain-containing protein 2	LRIT2	A6NDA9		LRIT2	11716-28	SL019575	0.172617	0.0949524	1.81794	0.186107	0.358724	-0.0134894	292	0.0687052	0.667264	0.816862
Myosin regulatory light chain 12B	ML12B	O14950	103910	MYL12B	19122-47	SL016370	0.271975	0.149748	1.81622	0.293506	0.565481	-0.0215309	292	0.0687846	0.138058	0.371561
Beta-crystallin B1	CRBB1	P53674	1414	CRYBB1	17751-68	SL020925	0.256477	0.141075	1.81801	0.276508	0.532984	-0.0200312	292	0.0689537	0.233919	0.483652
DnaJ homolog subfamily C member 4	DNJC4	Q9NNZ3	3338	DNAJC4	8653-132	SL018376	-0.243566	0.134272	-1.81397	0.263174	0.0196077	-0.50674	292	0.0691099	0.279115	0.528314
Peroxisomal carnitine O-octanoyltransferase	OCTC	Q9UKG9	54677	CROT	13929-27	SL020289	0.259978	0.143196	1.81554	0.280664	0.540642	-0.0206866	292	0.0691426	0.188589	0.434268
					12915-26		0.111786	0.0616194	1.81413	0.120774	0.23256	-0.00898833	292	0.0692504	0.845161	0.919327
KDEL motif-containing protein 2	KDEL2	Q7Z4H8	143888	KDELC2	8296-117	SL018458	0.261303	0.143847	1.81653	0.28194	0.543243	-0.0206371	292	0.0692802	0.208139	0.456223
Appetite-regulating hormone	ghrelin	Q9UBU3	51738	GHRL	6518-85	SL004269	0.272823	0.150501	1.81276	0.294983	0.567806	-0.0221598	292	0.0692928	0.142186	0.377076
Fragile X mental retardation syndrome-related protein 1	FXR1	P51114		FXR1	13076-4	SL018149	0.263149	0.145238	1.81185	0.284667	0.547816	-0.0215174	292	0.0693945	0.20918	0.457362
Prefoldin subunit 2	PFD2	Q9UHV9	5202	PFDN2	19243-2	SL011692	0.261203	0.144272	1.81049	0.282773	0.543975	-0.0215703	292	0.0695584	0.243098	0.49305
Secreted frizzled-related protein 1	SARP-2	Q8N474	6422	SFRP1	3221-54	SL003770	0.226614	0.124938	1.81381	0.244879	0.471493	-0.0182644	292	0.0696327	0.449942	0.670777
MAM domain-containing protein 2	MAMC2	Q7Z304	256691	MAMDC2	6119-14	SL012631	-0.255872	0.14126	-1.81135	0.27687	0.0209983	-0.532741	292	0.0697078	0.206793	0.454745
Histidine triad nucleotide-binding protein 2, mitochondrial	HINT2	Q9BX68	84681	HINT2	5612-16	SL016512	0.266819	0.147408	1.81007	0.28892	0.555739	-0.0221007	292	0.0697651	0.172273	0.415058
Coagulation factor XIII	Coagulation factor XIII	P00488, P05160	2162 2165	F13A1 F13B	16927-9	SL003003	-0.235857	0.130453	-1.80798	0.255689	0.0198314	-0.491546	292	0.0699313	0.226931	0.476372
A disintegrin and metalloproteinase with thrombospondin motifs 1	ATS1	Q9UHI8	9510	ADAMTS1	3174-2	SL008421	0.255536	0.141494	1.80598	0.277329	0.532865	-0.0217934	292	0.0701297	0.305332	0.552568
Proteasome subunit alpha type-6	PSA6	P60900	5687	PSMA6	3860-7	SL005630	0.286277	0.158268	1.80881	0.310206	0.596483	-0.0239291	292	0.0701459	0.0861157	0.293455
Cystatin-like 1	CST1L	Q9H114	128817	CSTL1	6368-9	SL012826	0.276924	0.153059	1.80926	0.299995	0.576919	-0.0230714	292	0.0701511	0.14104	0.375553
Adenylate kinase 4, mitochondrial	KAD4	P27144	205	AK4	17432-25	SL020885	0.204434	0.112837	1.81176	0.22116	0.425594	-0.0167264	292	0.0701646	0.538872	0.734079
Homer protein homolog 2	HOME2	Q9NSB8		HOMER2	12685-57	SL019790	0.248279	0.137501	1.80565	0.269501	0.51778	-0.0212225	292	0.0702393	0.28289	0.531874
Transmembrane protein 9	TMEM9	Q9P0T7	252839	TMEM9	8597-1	SL015300	-0.206273	0.113813	-1.81239	0.223073	0.0168004	-0.429346	292	0.0703224	0.512523	0.715907
Signal recognition particle 14 kDa protein	SRP14	P37108	6727	SRP14	17510-7	SL013036	0.227453	0.1258	1.80805	0.246569	0.474022	-0.0191157	292	0.0703442	0.429867	0.655643
Corticoliberin	CRH	P06850	1392	CRH	5614-44	SL003526	-0.185468	0.102588	-1.80789	0.201073	0.0156047	-0.386541	292	0.0703701	0.643911	0.802441
Casein kinase II subunit alpha'	CSK22	P19784	1459	CSNK2A2	13681-173	SL013751	0.238399	0.131906	1.80735	0.258535	0.496934	-0.0201359	292	0.0705611	0.367306	0.606058
Growth/differentiation factor 5	BMP-14	P43026	8200	GDF5	2752-62	SL004329	0.225687	0.125075	1.80442	0.245146	0.470833	-0.0194596	292	0.0706036	0.413034	0.642677
Kremen protein 2	KREM2	Q8NCW0	79412	KREMEN2	3202-28	SL010393	0.287498	0.159295	1.80482	0.312217	0.599716	-0.0247188	292	0.070614	0.0838679	0.2896
Death-inducer obliterator 1	DIDO1	Q9BTC0	11083	DIDO1	14329-4	SL011624	0.207134	0.114812	1.80411	0.225032	0.432166	-0.0178982	292	0.0706338	0.551483	0.742619
Caspase-2	Caspase-2	P42575	835	CASP2	4904-7	SL003710	0.216933	0.120331	1.8028	0.235849	0.452782	-0.0189164	292	0.0707052	0.462671	0.680199
DNA (cytosine-5)-methyltransferase 3-like	DNM3L	Q9UJW3		DNMT3L	19142-39	SL018889	-0.157854	0.0873616	-1.80691	0.171229	0.0133745	-0.329083	292	0.0708476	0.705107	0.839706
Prokineticin-1	EG-VEGF	P58294	84432	PROK1	2247-20	SL004332	-0.250502	0.138489	-1.80882	0.271439	0.0209364	-0.521941	292	0.0710181	0.362143	0.601783
Transmembrane protein 87B	TM87B	Q96K49		TMEM87B	13485-20	SL020165	0.241306	0.133778	1.80377	0.262206	0.503512	-0.0209	292	0.0710613	0.222058	0.47123
Casein kinase I isoform gamma-2	CSNK1G2	P78368	1455	CSNK1G2	12653-13	SL010497	0.270983	0.150529	1.8002	0.295037	0.56602	-0.0240541	292	0.0710845	0.132895	0.364547
Growth/differentiation factor 8	Myostatin	O14793	2660	MSTN	14583-49	SL004357	0.255465	0.141911	1.80017	0.278146	0.533611	-0.0226814	292	0.0711788	0.279716	0.528882
Mesencephalic astrocyte-derived neurotrophic factor	ARMET	P55145	7873	MANF	9223-11	SL011204	0.269614	0.149847	1.79926	0.2937	0.563315	-0.0240862	292	0.0713943	0.133212	0.364982
UPF0606 protein KIAA1549L	K154L	Q6ZVL6		KIAA1549L	11145-72	SL019333	-0.144428	0.0800872	-1.80338	0.156971	0.0125432	-0.301399	292	0.0714803	0.780105	0.883236
Glutathione S-transferase kappa 1	GSTK1	Q9Y2Q3	373156	GSTK1	13474-40	SL011317	0.273777	0.152415	1.79626	0.298733	0.57251	-0.0249563	292	0.0719078	0.112576	0.335524
Serpin A12	Vaspin	Q8IW75	145264	SERPINA12	6551-94	SL011969	0.1633	0.0908544	1.79738	0.178075	0.341374	-0.0147747	292	0.071912	0.69121	0.83139
Clathrin interactor 1	EPN4	Q14677	9685	CLINT1	11659-31	SL011224	0.26754	0.149041	1.79508	0.29212	0.55966	-0.0245796	292	0.0719882	0.104877	0.323847
					8770-136		0.148874	0.0829044	1.79574	0.162493	0.311367	-0.0136183	292	0.072057	0.763144	0.873581
					8377-87		0.260177	0.14503	1.79395	0.28426	0.544436	-0.0240826	292	0.072104	0.24621	0.496196
Beta-1,3-galactosyl-O-glycosyl-glycoprotein beta-1,6-N-acetylglucosaminyltransferase 4	GCNT4	Q9P109	51301	GCNT4	10842-7	SL018620	0.210301	0.11698	1.79775	0.229281	0.439582	-0.0189805	292	0.0721731	0.47659	0.690355
ATPase WRNIP1	WRIP1	Q96S55		WRNIP1	12528-40	SL019761	-0.195836	0.109126	-1.7946	0.213886	0.0180497	-0.409723	292	0.0721766	0.551939	0.742926
Gigaxonin	GAN	Q9H2C0	8139	GAN	10054-3	SL019232	0.20001	0.111533	1.79328	0.218605	0.418616	-0.0185953	292	0.0726378	0.509386	0.713713
Synaptojanin-2-binding protein	SYJ2B	P57105		SYNJ2BP	17348-5	SL018443	0.225218	0.125675	1.79206	0.246323	0.471541	-0.0211053	292	0.0726493	0.408424	0.63908
Angiopoietin-related protein 4	ANGL4	Q9BY76	51129	ANGPTL4	3796-79	SL007642	-0.249305	0.138734	-1.797	0.271918	0.0226131	-0.521222	292	0.0726694	0.23627	0.486076
Rac GTPase-activating protein 1	RGAP1	Q9H0H5	29127	RACGAP1	13587-10	SL005989	0.193029	0.107786	1.79085	0.211261	0.40429	-0.018232	292	0.0727163	0.495477	0.703901
Thrombospondin-type laminin G domain and EAR repeat-containing protein	TSEAR	Q8WU66	54084	TSPEAR	10546-2	SL012744	0.201344	0.112271	1.79338	0.220052	0.421396	-0.0187072	292	0.0731662	0.541663	0.735978
Alpha-actinin-1	ACTN1	P12814	87	ACTN1	9843-5	SL008029	0.268701	0.150325	1.78747	0.294636	0.563337	-0.0259354	292	0.0731817	0.110976	0.333131
RAF proto-oncogene serine/threonine-protein kinase	c-Raf	P04049	5894	RAF1	10001-7	SL002564	0.279146	0.156266	1.78636	0.306281	0.585427	-0.0271343	292	0.0732238	0.0920434	0.303387
CDK5 and ABL1 enzyme substrate 2	CABL2	Q9BTV7	81928	CABLES2	7105-7	SL018130	0.243888	0.136577	1.78572	0.26769	0.511578	-0.0238027	292	0.0733757	0.325271	0.570326
Roundabout homolog 4	ROBO4	Q8WZ75	54538	ROBO4	16297-14	SL008763	0.164376	0.091966	1.78736	0.180253	0.34463	-0.0158773	292	0.073434	0.705897	0.840177
Ribonucleoside-diphosphate reductase large subunit	RRM1	P23921	6240	RRM1	11360-39	SL009588	0.190262	0.106235	1.79096	0.20822	0.398482	-0.0179574	292	0.0734366	0.328052	0.572758
Protein APCDD1	APCD1	Q8J025	147495	APCDD1	6599-5	SL017118	-0.20925	0.117051	-1.78768	0.22942	0.0201699	-0.43867	292	0.0736082	0.443133	0.665682
Uncharacterized protein KIAA0040	KIAA0040	J3QR46		KIAA0040	14603-51	SL020082	0.267883	0.149916	1.78689	0.293835	0.561718	-0.0259523	292	0.0736134	0.154517	0.393086
Complement factor H-related protein 5	complement factor H-related 5	Q9BXR6	81494	CFHR5	16055-3	SL006830	0.224372	0.125761	1.78411	0.246492	0.470864	-0.0221198	292	0.0736375	0.425428	0.652248
Tyrosine-protein kinase JAK2	JAK2	O60674	3717	JAK2	11816-84	SL007025	0.273218	0.153015	1.78556	0.299909	0.573127	-0.0266919	292	0.0737807	0.0971715	0.311723
Serine--tRNA ligase, mitochondrial	SYSM	Q9NP81		SARS2	12348-46	SL019681	0.25994	0.145713	1.78392	0.285597	0.545537	-0.025657	292	0.0738207	0.172322	0.415117
Solute carrier organic anion transporter family member 5A1	SO5A1	Q9H2Y9		SLCO5A1	11669-39	SL019571	0.174374	0.0976146	1.78635	0.191325	0.365699	-0.0169507	292	0.0739691	0.64274	0.801711
Neurensin-1	NRSN1	Q8IZ57		NRSN1	11654-77	SL019578	-0.204343	0.114664	-1.78211	0.224741	0.0203978	-0.429084	292	0.0740016	0.545924	0.738867
Aspartoacylase	ACY2	P45381	443	ASPA	18187-16	SL020921	-0.208465	0.116978	-1.78209	0.229276	0.0208109	-0.437741	292	0.0741595	0.514488	0.717278
Uncharacterized protein C7orf73	CG073	E0CX11	647087	C7orf73	8927-6	SL018723	0.191462	0.107417	1.78243	0.210537	0.401999	-0.0190742	292	0.0742284	0.591753	0.769255
Low-density lipoprotein receptor-related protein 8	LRP8	Q14114	7804	LRP8	3323-37	SL004610	0.164125	0.0921567	1.78094	0.180627	0.344753	-0.0165016	292	0.0742449	0.699836	0.836562
Prolyl 4-hydroxylase subunit alpha-1	P4HA1	P13674	5033	P4HA1	11645-9	SL012417	-0.223581	0.125297	-1.78441	0.245582	0.022001	-0.469164	292	0.0743154	0.448576	0.669758
Homeobox protein DLX-3	DLX3	O60479		DLX3	11422-2	SL019446	0.244277	0.137278	1.77943	0.269066	0.513343	-0.0247886	292	0.0745235	0.284584	0.533464
Complement factor D	Factor D	P00746	1675	CFD	2946-52	SL003327	0.19885	0.111524	1.78302	0.218588	0.417438	-0.0197373	292	0.0748122	0.366656	0.605521
Enoyl-CoA delta isomerase 2, mitochondrial	PECI	O75521	10455	ECI2	12859-33	SL007038	0.2556	0.143897	1.77627	0.282037	0.537637	-0.0264376	292	0.0749961	0.213262	0.461803
Voltage-dependent L-type calcium channel subunit beta-4	CACB4	O00305		CACNB4	11130-158	SL019338	0.261563	0.14707	1.7785	0.288257	0.54982	-0.0266936	292	0.0750521	0.168989	0.411082
PDZ domain-containing protein 7	PDZD7	Q9H5P4		PDZD7	12391-27	SL019695	-0.242158	0.136563	-1.77323	0.267664	0.0255056	-0.509823	292	0.0753345	0.352853	0.594015
Epidermal growth factor receptor substrate 15-like 1	EP15R	Q9UBC2	58513	EPS15L1	4212-5	SL012188	0.262048	0.148011	1.77046	0.290102	0.55215	-0.0280535	292	0.0759533	0.137668	0.371036
Phosphoglucomutase-2	PGM2	Q96G03	55276	PGM2	18330-7	SL010957	0.24714	0.139376	1.77319	0.273176	0.520317	-0.0260361	292	0.0759653	0.275769	0.525137
Fibulin-5	fibulin 5	Q9UBX5	10516	FBLN5	15585-304	SL004460	-0.248302	0.140069	-1.77271	0.274535	0.0262335	-0.522837	292	0.0760169	0.167373	0.409113
					8613-97		0.245367	0.138931	1.76611	0.272305	0.517672	-0.0269373	292	0.0765455	0.299179	0.546973
Cytohesin-4	CYH4	Q9UIA0		CYTH4	12746-4	SL019898	0.246035	0.139344	1.76567	0.273115	0.51915	-0.0270794	292	0.0765751	0.283687	0.532623
Dolichyl-diphosphooligosaccharide--protein glycosyltransferase 48 kDa subunit	OST48	P39656	1650	DDOST	17161-1	SL016423	0.270184	0.152944	1.76655	0.29977	0.569955	-0.0295864	292	0.0766765	0.125707	0.354552
Atrial natriuretic factor	ANP	P01160	4878	NPPA	5443-62	SL002505	-0.233717	0.131831	-1.77285	0.258389	0.024672	-0.492106	292	0.0768699	0.393813	0.627545
NAD(P)H-hydrate epimerase	AIBP	Q8NCW5	128240	APOA1BP	16621-77	SL012584	0.257244	0.145723	1.76529	0.285618	0.542862	-0.0283733	292	0.0769215	0.214635	0.463287
Cerberus	CER1	O95813	9350	CER1	6230-56	SL007062	-0.20492	0.115616	-1.77241	0.226608	0.0216885	-0.431528	292	0.0769608	0.55369	0.744104
Cathepsin E	CATE	P14091	1510	CTSE	15376-134	SL007121	-0.205557	0.116431	-1.76548	0.228205	0.0226484	-0.433762	292	0.0770144	0.511391	0.715116
Leukocyte surface antigen CD47	CD47	Q08722	961	CD47	6653-58	SL004838	0.260675	0.147764	1.76413	0.289618	0.550293	-0.0289423	292	0.0771138	0.203163	0.450736
E3 ubiquitin-protein ligase DTX3L	DTX3L	Q8TDB6		DTX3L	11643-73	SL019554	0.270333	0.153273	1.76374	0.300415	0.570749	-0.0300819	292	0.0773036	0.114886	0.338948
Nucleolysin TIAR	TIAR	Q01085	7073	TIAL1	19131-184	SL014895	0.247892	0.140531	1.76397	0.275441	0.523334	-0.0275488	292	0.0773124	0.212613	0.4611
Collagen alpha-1(XIII) chain	CODA1	Q5TAT6	1305	COL13A1	6570-1	SL017501	0.233125	0.132233	1.76298	0.259177	0.492302	-0.0260519	292	0.0773243	0.365583	0.604635
Dynein light chain roadblock-type 1	DLRB1	Q9NP97	83658	DYNLRB1	3845-51	SL011530	0.251924	0.14295	1.76232	0.280182	0.532106	-0.0282582	292	0.0774624	0.205372	0.45318
Beta-1,4-galactosyltransferase 7	B4GT7	Q9UBV7	11285	B4GALT7	7806-33	SL018246	0.216762	0.12288	1.76402	0.240845	0.457607	-0.0240823	292	0.0775273	0.488783	0.69913
Contactin-2	CNTN2	Q02246	6900	CNTN2	3296-92	SL008623	-0.158174	0.089687	-1.76362	0.175787	0.0176123	-0.333961	292	0.077757	0.700828	0.837155
Microfibrillar-associated protein 3-like	MFA3L	O75121	9848	MFAP3L	8837-8	SL018675	0.241471	0.13716	1.76051	0.268833	0.510304	-0.0273615	292	0.077787	0.273233	0.522717
Rho GTPase-activating protein 36	RHG36	Q6ZRI8	158763	ARHGAP36	6289-78	SL017400	-0.246128	0.139587	-1.76326	0.27359	0.0274621	-0.519717	292	0.077789	0.281095	0.530184
Apolipoprotein B	Apo B	P04114	338	APOB	2797-56	SL000020	0.202141	0.114837	1.76024	0.22508	0.427221	-0.0229395	292	0.078028	0.473178	0.687879
DNA polymerase iota	POLI	Q9UNA4		POLI	13536-56	SL020124	0.222439	0.126489	1.75856	0.247918	0.470357	-0.0254797	292	0.078118	0.447681	0.66909
Fatty acid synthase	Fatty acid synthase	P49327	2194	FASN	8403-18	SL000073	0.272474	0.155114	1.75661	0.304023	0.576497	-0.0315489	292	0.0782641	0.101028	0.317848
Dual specificity protein phosphatase 15	DUS15	Q9H1R2		DUSP15	12838-28	SL019935	0.19971	0.113475	1.75994	0.222412	0.422122	-0.0227014	292	0.0786544	0.556388	0.745914
3-hydroxyacyl-CoA dehydrogenase type-2	ERAB	Q99714	3028	HSD17B10	4217-49	SL004795	0.264861	0.150939	1.75475	0.29584	0.560701	-0.0309795	292	0.0786908	0.127523	0.357104
Insulin-like growth factor-binding protein 6	IGFBP-6	P24592	3489	IGFBP6	14088-38	SL005172	0.211158	0.120178	1.75705	0.235548	0.446707	-0.02439	292	0.0786975	0.367284	0.60604
Forkhead box protein M1	FOXM1	Q08050	2305	FOXM1	10056-5	SL007372	0.276694	0.157711	1.75444	0.309113	0.585808	-0.0324193	292	0.0788518	0.0856791	0.29271
E3 ubiquitin-protein ligase CHIP	CHIP	Q9UNE7	10273	STUB1	11350-30	SL019100	0.256598	0.146265	1.75434	0.286679	0.543278	-0.0300811	292	0.0788533	0.159	0.398748
Complement C3b, inactivated	iC3b	P01024	718	C3	2683-1	SL000456	-0.241036	0.137588	-1.75187	0.269672	0.0286364	-0.510708	292	0.0789205	0.202165	0.449628
Tyrosine-protein phosphatase non-receptor type 9	PTN9	P43378		PTPN9	12633-3	SL019812	0.250974	0.143037	1.75461	0.280353	0.531327	-0.0293787	292	0.0792051	0.25644	0.506399
Phospholipase D3	PLD3	Q8IV08	23646	PLD3	10948-14	SL008958	0.254022	0.145004	1.75183	0.284208	0.53823	-0.0301856	292	0.0792383	0.200667	0.447959
E3 ubiquitin-protein ligase DTX1	DTX1	Q86Y01	1840	DTX1	11430-49	SL007518	-0.241383	0.137848	-1.75108	0.270182	0.0287998	-0.511565	292	0.0792728	0.273342	0.522821
Fibrinogen C domain-containing protein 1	FBCD1	Q8N539	84929	FIBCD1	9378-6	SL017513	0.201082	0.114669	1.75359	0.224751	0.425833	-0.0236691	292	0.0792772	0.550207	0.741759
WNT1-inducible-signaling pathway protein 1	WISP-1	O95388	8840	WISP1	13692-154	SL004689	0.156663	0.0892643	1.75505	0.174958	0.331621	-0.0182949	292	0.0793142	0.73202	0.855582
Tubulointerstitial nephritis antigen-like	TINAL	Q9GZM7	64129	TINAGL1	11192-168	SL008302	0.220461	0.125603	1.75522	0.246181	0.466642	-0.0257203	292	0.0793627	0.361857	0.601546
					8868-4		-0.199617	0.114135	-1.74895	0.223705	0.0240883	-0.423322	292	0.0795045	0.540257	0.735022
Protocadherin alpha-C1	PCDC1	Q9H158	56135	PCDHAC1	7193-98	SL018124	0.255299	0.146042	1.74812	0.286242	0.541541	-0.0309427	292	0.0795744	0.216964	0.465794
Butyrophilin-like protein 8	BTNL8	Q6UX41	79908	BTNL8	9026-40	SL018801	0.220184	0.125925	1.74853	0.246813	0.466997	-0.0266294	292	0.0797346	0.446277	0.668039
Serine dehydratase-like	SDSL	Q96GA7	113675	SDSL	17777-31	SL020957	0.209802	0.11992	1.74952	0.235042	0.444844	-0.0252407	292	0.0797396	0.484518	0.696073
3-hydroxy-3-methylglutaryl-coenzyme A reductase	HMGR	P04035	3156	HMGCR	5230-99	SL016557	-0.195259	0.111452	-1.75195	0.218447	0.0231877	-0.413706	292	0.0798181	0.574021	0.757642
AH receptor-interacting protein	AIP	O00170	9049	AIP	3839-60	SL011629	0.257714	0.147407	1.74831	0.288919	0.546633	-0.0312044	292	0.0798314	0.1331	0.364828
Beta-defensin 128	DB128	Q7Z7B8	245939	DEFB128	6360-7	SL012642	-0.222358	0.127324	-1.74639	0.249556	0.0271974	-0.471914	292	0.0799516	0.350365	0.591916
N-acetylneuraminate lyase	NPL	Q9BXD5	80896	NPL	19496-1	SL008297	0.219828	0.125936	1.74555	0.246835	0.466664	-0.0270071	292	0.0801209	0.388745	0.623494
Protein TSSC4	TSSC4	Q9Y5U2	10078	TSSC4	18181-2	SL021024	0.265821	0.152322	1.74513	0.298551	0.564371	-0.0327301	292	0.0803679	0.129723	0.360171
					7817-36		-0.207948	0.118951	-1.74817	0.233145	0.0251969	-0.441093	292	0.0803766	0.479138	0.692198
Pre-mRNA-splicing factor ATP-dependent RNA helicase PRP16	PRP16	Q92620		DHX38	13645-14	SL020202	0.194777	0.111458	1.74753	0.218459	0.413236	-0.0236811	292	0.0804347	0.56396	0.750973
Lamin-B1	Lamin-B1	P20700	4001	LMNB1	3889-64	SL006132	0.25378	0.145652	1.74238	0.285477	0.539258	-0.0316968	292	0.0806067	0.260532	0.510423
Inter-alpha-trypsin inhibitor heavy chain H4	ITI heavy chain H4	Q14624	3700	ITIH4	4811-33	SL004739	-0.212359	0.121773	-1.7439	0.238674	0.0263155	-0.451033	292	0.0806134	0.427717	0.654
Myotubularin-related protein 6	MTMR6	Q9Y217		MTMR6	12536-46	SL019758	0.224806	0.128909	1.7439	0.252663	0.477468	-0.0278567	292	0.0806982	0.375791	0.613018
Acyl-CoA-binding domain-containing protein 6	ACBD6	Q9BR61	84320	ACBD6	10075-75	SL019254	0.270391	0.155109	1.74323	0.304014	0.574404	-0.0336232	292	0.0807991	0.0845601	0.290792
Glucagon-like peptide 1 receptor	GLP1R	P43220	2740	GLP1R	13085-18	SL007231	-0.219417	0.125899	-1.7428	0.246762	0.0273452	-0.466179	292	0.0810633	0.389192	0.623852
Probable ATP-dependent RNA helicase DDX46	DDX46	Q7L014		DDX46	14216-35	SL019957	0.211308	0.120963	1.74688	0.237088	0.448396	-0.0257802	292	0.0811142	0.471129	0.686388
Heterogeneous nuclear ribonucleoprotein A/B	hnRNP A/B	Q99729	3182	HNRNPAB	8894-80	SL009791	0.280237	0.160912	1.74156	0.315387	0.595625	-0.0351502	292	0.0811828	0.0890516	0.298415
Syntaxin-7	Syntaxin-7	O15400	8417	STX7	8274-64	SL006066	0.262536	0.150893	1.73988	0.295749	0.558285	-0.0332139	292	0.0812681	0.160055	0.400069
Ras-related protein Rab-32	RAB32	Q13637	10981	RAB32	17778-19	SL016450	0.265403	0.15262	1.73898	0.299134	0.564537	-0.0337318	292	0.0813735	0.121798	0.348995
Interferon alpha-10	IFN10	P01566	3446	IFNA10	14128-121	SL017106	0.200409	0.115143	1.74051	0.225681	0.426089	-0.0252723	292	0.081412	0.541436	0.735824
SAGA-associated factor 29 homolog	SGF29	Q96ES7		CCDC101	12788-6	SL019859	-0.185441	0.106401	-1.74284	0.208547	0.0231061	-0.393987	292	0.0814888	0.582303	0.763088
Egl nine homolog 1	EGLN1	Q9GZT9	54583	EGLN1	9901-28	SL007650	-0.227483	0.131028	-1.73614	0.256814	0.0293316	-0.484297	292	0.0815975	0.350993	0.592446
Stress-induced-phosphoprotein 1	Stress-induced-phosphoprotein 1	P31948	10963	STIP1	5489-18	SL010250	0.268903	0.154788	1.73723	0.303385	0.572288	-0.0344817	292	0.0816041	0.101705	0.318912
Retinoblastoma-like protein 2	p130	Q08999	5934	RBL2	13565-2	SL003760	-0.161769	0.0930455	-1.7386	0.182369	0.0206005	-0.344138	292	0.0817085	0.648352	0.805203
Cystatin-SN	CYTN	P01037	1469	CST1	5459-33	SL010456	0.140104	0.0805631	1.73906	0.157904	0.298008	-0.0177997	292	0.0817323	0.754677	0.868721
Glypican-6	GPC6	Q9Y625	10082	GPC6	5350-14	SL012881	0.225994	0.130308	1.73431	0.255403	0.481398	-0.0294088	292	0.0818682	0.385114	0.620576
Mitogen-activated protein kinase 10	MK10	P53779	5602	MAPK10	15418-25	SL007282	0.258549	0.148914	1.73623	0.291872	0.55042	-0.033323	292	0.0819328	0.119315	0.34542
Tumor necrosis factor alpha-induced protein 3	TNFAIP3	P21580	7128	TNFAIP3	14009-65	SL005721	0.24963	0.143754	1.7365	0.281758	0.531388	-0.0321286	292	0.0819407	0.238166	0.488022
Immunoglobulin G	IgG	P01857	3500 3501 3502 3503 50802 3535	IGHG1 IGHG2 IGHG3 IGHG4 IGK@ IGL@	2744-57	SL000467	0.207559	0.119499	1.73691	0.234219	0.441778	-0.0266594	292	0.081964	0.434041	0.658818
T-box transcription factor TBX3	Tbx3	O15119	6926	TBX3	13978-122	SL004696	0.180754	0.104172	1.73516	0.204177	0.384931	-0.0234225	292	0.0822753	0.609022	0.780399
Ras-related protein R-Ras2	RRAS2	P62070	22800	RRAS2	12361-102	SL008513	0.192439	0.111001	1.73367	0.217561	0.41	-0.0251227	292	0.0824592	0.587424	0.766436
Vascular endothelial growth factor receptor 3	VEGF sR3	P35916	2324	FLT4	16035-8	SL003322	0.211583	0.12212	1.73258	0.239356	0.450939	-0.0277725	292	0.0828198	0.318893	0.564706
Protein HEXIM1	HEXI1	O94992		HEXIM1	15596-7	SL020142	0.275126	0.158972	1.73065	0.311585	0.586711	-0.0364595	292	0.0828544	0.0551724	0.234888
Transducin beta-like protein 2	TBL2	Q9Y4P3		TBL2	11227-31	SL019356	0.256644	0.14838	1.72964	0.290825	0.547469	-0.0341805	292	0.0830033	0.160887	0.401107
Receptor-type tyrosine-protein kinase FLT3	Flt-3	P36888	2322	FLT3	3437-80	SL004636	0.252359	0.14587	1.73003	0.285905	0.538264	-0.0335455	292	0.0832867	0.201364	0.448736
Immunoglobulin J chain	IgJ	P01591	3512	IGJ	15306-20	SL005375	0.209314	0.120791	1.73286	0.236751	0.446065	-0.0274372	292	0.0833351	0.488498	0.698927
Aprataxin	APTX	Q7Z2E3	54840	APTX	17736-105	SL020973	-0.202803	0.11741	-1.7273	0.230124	0.0273208	-0.432928	292	0.083433	0.490097	0.700069
Membrane-associated progesterone receptor component 2	PGRC2	O15173	10424	PGRMC2	8681-93	SL007962	-0.221068	0.128075	-1.72609	0.251027	0.0299582	-0.472095	292	0.0835244	0.418673	0.64705
Alpha-hemoglobin-stabilizing protein	AHSP	Q9NZD4	51327	AHSP	9025-5	SL010892	0.236687	0.13659	1.73284	0.267716	0.504403	-0.0310281	292	0.0835455	0.307777	0.554777
Rho GTPase-activating protein 25	RHG25	P42331	9938	ARHGAP25	11333-82	SL006485	0.275858	0.159578	1.72867	0.312774	0.588631	-0.0369157	292	0.0836038	0.0567644	0.238253
Cyclin-dependent kinase 4 inhibitor C	CDN2C	P42773	1031	CDKN2C	12521-3	SL007230	0.213991	0.123755	1.72915	0.24256	0.456551	-0.0285692	292	0.0837573	0.48133	0.693779
Platelet-derived growth factor receptor-like protein	PGFRL	Q15198	5157	PDGFRL	9713-67	SL012503	0.156747	0.0907128	1.72795	0.177797	0.334544	-0.0210503	292	0.0837943	0.624978	0.790555
Dickkopf-related protein 4	Dkk-4	Q9UBT3	27121	DKK4	3365-7	SL010612	0.216166	0.12514	1.72739	0.245274	0.46144	-0.0291086	292	0.0837944	0.457591	0.676454
Nodulation protein H_NOH4	NOH4_RHIML	P06237		nodH	3721-5	SL004319	0.235357	0.136386	1.72567	0.267316	0.502673	-0.0319595	292	0.0838066	0.354689	0.595558
Ribosomal protein S6 kinase beta-1	KS6B1	P23443	6198	RPS6KB1	15608-5	SL018792	0.261622	0.151778	1.72371	0.297486	0.559108	-0.0358631	292	0.0840731	0.136272	0.36915
Integral membrane protein 2B	ITM2B	Q9Y287	9445	ITM2B	8086-49	SL008714	0.183723	0.106548	1.72433	0.208833	0.392556	-0.0251105	292	0.0841004	0.579699	0.76138
[truncated: 2,603 more rows]

## Sheet: ST3
Supplementary Table 3 - Linear mixed model results for the effect of timepoint on protein levels in the By-Band-Sleeve bariatric surgery trial. Intervention beta coefficient is the estimate for the difference in protein levels at endpoint compared to baseline.
OlinkID	UniProt	Assay	Intervention beta coefficient	Intervention standard error	Intervention t statistic	P value	N	Beta coefficient 95% CI	Beta coefficient lower 95% CI	Beta coefficient upper 95% CI	Percentage of samples < LOD
oid20325	P18065	IGFBP2	1.0032	0.0763049	13.1472	4.34468e-25	236	0.149558	0.853641	1.15276	0
oid20182	Q8WTU2	SSC4D	-0.744423	0.0645993	-11.5237	3.0672e-21	236	0.126615	-0.871038	-0.617809	0
oid20246	P08833	IGFBP1	0.773438	0.0742847	10.4118	1.41329e-18	236	0.145598	0.62784	0.919036	0
oid21101	Q02747	GUCA2A	0.810855	0.0863355	9.39191	3.87584e-16	236	0.169218	0.641638	0.980073	0
oid20723	Q96PL1	SCGB3A2	0.621787	0.0677496	9.17772	1.25131e-15	236	0.132789	0.488998	0.754576	0
oid20916	P11464	PSG1	0.55284	0.0607135	9.10572	1.85405e-15	236	0.118998	0.433841	0.671838	0.028
oid21282	Q9BYE9	CDHR2	-0.685174	0.0766434	-8.93976	4.5803e-15	236	0.150221	-0.835395	-0.534953	0
oid20415	P05451	REG1A	0.778468	0.0871735	8.9301	4.82747e-15	236	0.17086	0.607608	0.949328	0
oid20896	O95994	AGR2	0.870191	0.0982614	8.85587	6.53713e-15	236	0.192592	0.677598	1.06278	0.1
oid20700	P18510	IL1RN	-0.855988	0.0965818	-8.86283	6.95927e-15	236	0.1893	-1.04529	-0.666688	0
oid20758	Q9NQ30	ESM1	0.72705	0.0822114	8.84367	7.72265e-15	236	0.161134	0.565916	0.888185	0
oid20637	P20273	CD22	-0.575147	0.065134	-8.83021	8.30857e-15	236	0.127663	-0.702809	-0.447484	0
oid20258	Q06141	REG3A	0.674772	0.0777458	8.6792	1.884e-14	236	0.152382	0.52239	0.827153	0
oid20490	P12034	FGF5	0.633367	0.0737907	8.58328	3.16463e-14	236	0.14463	0.488737	0.777997	0
oid20596	P08727	KRT19	0.706676	0.0851088	8.3032	1.42891e-13	236	0.166813	0.539862	0.873489	0
oid20575	P28845	HSD11B1	0.756336	0.092128	8.20963	2.35848e-13	236	0.180571	0.575766	0.936907	0
oid21529	P15328	FCN2	0.687859	0.0838372	8.2047	2.4215e-13	236	0.164321	0.523538	0.85218	0
oid20457	O76038	SCGN	0.761912	0.0929391	8.19797	2.51021e-13	236	0.182161	0.579751	0.944073	0.12
oid20254	Q14767	LTBP2	0.550164	0.0678279	8.11118	3.98986e-13	236	0.132943	0.417222	0.683107	0
oid20187	P41159	LEP	-0.695698	0.0863148	-8.06001	5.24034e-13	236	0.169177	-0.864875	-0.526521	0
oid21391	Q9Y5K2	KLK4	0.529739	0.0662679	7.99391	7.44771e-13	236	0.129885	0.399854	0.659624	0
oid20652	Q13478	IL18R1	-0.548209	0.0697198	-7.86303	1.49032e-12	236	0.136651	-0.68486	-0.411558	0
oid20276	P07858	CTSB	0.649971	0.0826799	7.86129	1.50415e-12	236	0.162053	0.487918	0.812023	0
oid20266	P48304	REG1B	0.739551	0.0947771	7.80306	2.04588e-12	236	0.185763	0.553788	0.925314	0
oid20662	O43915	VEGFD	0.595562	0.0768873	7.74591	2.76512e-12	236	0.150699	0.444863	0.746261	0
oid20166	P08263	GSTA1	-0.644257	0.0835482	-7.7112	3.31924e-12	236	0.163754	-0.808011	-0.480502	0
oid20179	P27352	CBLIF	-0.806908	0.104903	-7.69192	3.67327e-12	236	0.205611	-1.01252	-0.601298	0
oid20784	Q9BYZ8	REG4	0.701903	0.0922582	7.60803	5.7041e-12	236	0.180826	0.521077	0.882729	0
oid20245	P15090	FABP4	-0.641606	0.0846917	-7.57578	6.75302e-12	236	0.165996	-0.807601	-0.47561	0
oid21276	P05231	IL6	-0.693911	0.0944286	-7.34853	2.2042e-11	236	0.18508	-0.878992	-0.508831	0
oid20785	Q8TEU8	WFIKKN2	0.510797	0.0698656	7.31113	2.67489e-11	236	0.136937	0.37386	0.647733	0
oid20290	P16581	SELE	-0.547045	0.0749919	-7.29472	2.91168e-11	236	0.146984	-0.694029	-0.400061	0
oid20117	P08319	ADH4	-0.618588	0.0848104	-7.29378	2.92588e-11	236	0.166228	-0.784817	-0.45236	0
oid20743	P16422	EPCAM	0.654987	0.091629	7.14824	6.18969e-11	236	0.179593	0.475394	0.83458	0
oid20911	P05231	IL6	-0.665176	0.0931904	-7.13782	6.5297e-11	236	0.182653	-0.847829	-0.482523	0
oid21384	Q16653	MOG	0.493208	0.0693644	7.11039	7.51489e-11	236	0.135954	0.357254	0.629163	0
oid20481	Q8TAD2	IL17D	0.625541	0.0881849	7.09351	8.193e-11	236	0.172842	0.452698	0.798383	0
oid20264	Q9UBP4	DKK3	0.579447	0.083058	6.97642	1.48875e-10	236	0.162794	0.416654	0.742241	0
oid20725	Q99983	OMD	0.560466	0.0818791	6.84505	2.89658e-10	236	0.160483	0.399983	0.720949	0
oid20807	P45452	MMP13	0.640587	0.0939802	6.81619	3.35051e-10	236	0.184201	0.456386	0.824788	0.24
oid20460	O14904	WNT9A	0.570322	0.0839022	6.79746	3.6819e-10	236	0.164448	0.405874	0.73477	0.044
oid20215	P20711	DDC	0.674915	0.101333	6.66035	7.322e-10	236	0.198613	0.476302	0.873528	0
oid20563	P05231	IL6	-0.631029	0.0953759	-6.61623	9.12348e-10	236	0.186937	-0.817966	-0.444092	0.016
oid21346	P07949	RET	-0.592446	0.0898167	-6.59617	1.00812e-09	236	0.176041	-0.768487	-0.416406	0
oid20996	Q9NR71	ASAH2	-0.484975	0.0735695	-6.59207	1.02891e-09	236	0.144196	-0.629171	-0.340779	0
oid20101	P05231	IL6	-0.615324	0.093385	-6.58911	1.04416e-09	236	0.183035	-0.798359	-0.432289	0
oid21121	Q99972	MYOC	0.513821	0.0782985	6.56234	1.19264e-09	236	0.153465	0.360356	0.667286	0
oid21372	P58499	FAM3B	0.557112	0.0850659	6.54918	1.27307e-09	236	0.166729	0.390382	0.723841	0
oid21038	P05060	CHGB	0.472481	0.0723003	6.53498	1.3659e-09	236	0.141709	0.330772	0.614189	0
oid20360	Q86VB7	CD163	-0.545106	0.0834154	-6.53483	1.36686e-09	236	0.163494	-0.7086	-0.381611	0
oid21440	P13726	F3	0.560097	0.0857593	6.53103	1.39283e-09	236	0.168088	0.392009	0.728185	0
oid21388	P01303	NPY	0.626891	0.0967993	6.47619	1.82661e-09	236	0.189727	0.437164	0.816618	0
oid20674	O15444	CCL25	0.516868	0.0806942	6.40526	2.58833e-09	236	0.158161	0.358707	0.675028	0
oid20715	O95750	FGF19	0.585897	0.092269	6.34987	3.39775e-09	236	0.180847	0.405049	0.766744	0
oid20509	O60575	SPINK4	0.543643	0.0857998	6.33618	3.63307e-09	236	0.168168	0.375475	0.71181	0.012
oid21514	P09958	FURIN	-0.651895	0.103132	-6.32099	3.91283e-09	236	0.202138	-0.854033	-0.449757	0
oid21075	P19440	GGT1	-0.554908	0.0880637	-6.30121	4.30932e-09	236	0.172605	-0.727513	-0.382303	0
oid21369	P82980	RBP5	-0.586435	0.0931842	-6.29329	4.47887e-09	236	0.182641	-0.769076	-0.403794	0
oid20777	Q15166	PON3	0.494715	0.0787323	6.2835	4.69767e-09	236	0.154315	0.340399	0.64903	0
oid21002	O15496	PLA2G10	0.486048	0.0773781	6.28147	4.74444e-09	236	0.151661	0.334387	0.637709	0
oid21242	Q16772	GSTA3	-0.601056	0.0965191	-6.22733	6.172e-09	236	0.189177	-0.790233	-0.411879	0.216
oid20756	Q15109	AGER	0.490864	0.0788549	6.2249	6.24517e-09	236	0.154556	0.336308	0.645419	0
oid20585	Q9NRM6	IL17RB	0.444135	0.0721348	6.15701	8.67245e-09	236	0.141384	0.30275	0.585519	0
oid20220	P01241	GH1	0.62867	0.102832	6.11358	1.06903e-08	236	0.20155	0.427119	0.83022	0
oid20603	P41217	CD200	0.550323	0.0900543	6.11101	1.0823e-08	236	0.176506	0.373816	0.726829	0
oid21055	O14594	NCAN	0.459449	0.0758621	6.05637	1.40665e-08	236	0.14869	0.310759	0.608138	0
oid20106	P07585	DCN	0.518571	0.0858042	6.04366	1.49484e-08	236	0.168176	0.350395	0.686747	0
oid21312	O75054	IGSF3	-0.566897	0.096691	-5.86298	3.52475e-08	236	0.189514	-0.756412	-0.377383	0
oid20676	Q92484	SMPDL3A	0.451289	0.0772847	5.8393	3.94032e-08	236	0.151478	0.299811	0.602767	0
oid20668	P51671	CCL11	0.510083	0.088512	5.76287	5.63774e-08	236	0.173483	0.3366	0.683567	0
oid20375	Q96H15	TIMD4	-0.406929	0.0707601	-5.75082	5.96408e-08	236	0.13869	-0.545619	-0.268239	0
oid21401	Q9ULX7	CA14	0.460765	0.0802292	5.74311	6.18266e-08	236	0.157249	0.303516	0.618014	0
oid20322	P10451	SPP1	0.535137	0.093607	5.71685	6.98705e-08	236	0.18347	0.351668	0.718607	0
oid20979	O15232	MATN3	0.54022	0.0945569	5.71317	7.10774e-08	236	0.185332	0.354888	0.725551	0
oid20781	O00182	LGALS9	-0.533915	0.0939646	-5.68209	8.21153e-08	236	0.184171	-0.718086	-0.349745	0
oid21043	Q01469	FABP5	-0.553151	0.0975553	-5.67012	8.67987e-08	236	0.191208	-0.744359	-0.361942	0
oid21464	Q9Y5W5	WIF1	0.559934	0.0988548	5.66421	8.92105e-08	236	0.193755	0.366179	0.753689	0
oid20240	P01130	LDLR	-0.499916	0.0885419	-5.6461	9.70076e-08	236	0.173542	-0.673459	-0.326374	0
oid21516	P01298	PPY	0.358328	0.0639117	5.60662	1.16391e-07	236	0.125267	0.233062	0.483595	0.02
oid20615	P37235	HPCAL1	-0.551285	0.0983916	-5.60297	1.18365e-07	236	0.192848	-0.744133	-0.358437	0
oid21026	P13611	VCAN	0.512528	0.0916436	5.59262	1.24137e-07	236	0.179621	0.332907	0.692149	0
oid20912	Q92932	PTPRN2	0.477146	0.0856928	5.5681	1.38945e-07	236	0.167958	0.309188	0.645104	0
oid20308	Q8TDL5	BPIFB1	0.36142	0.0649518	5.56443	1.41305e-07	236	0.127306	0.234114	0.488725	0
oid21400	P13521	SCG2	0.514403	0.092579	5.55637	1.46621e-07	236	0.181455	0.332949	0.695858	0
oid20094	Q9H5Y7	SLITRK6	0.536407	0.0969347	5.53369	1.6267e-07	236	0.189992	0.346415	0.726399	0
oid21063	P21757	MSR1	-0.420376	0.0759697	-5.53347	1.62837e-07	236	0.148901	-0.569277	-0.271475	0
oid21307	P08473	MME	-0.419212	0.0758712	-5.52531	1.69027e-07	236	0.148707	-0.567919	-0.270504	0
oid21111	Q96RD9	FCRL5	-0.373906	0.0677309	-5.52046	1.72813e-07	236	0.132753	-0.506658	-0.241153	0
oid21128	P00352	ALDH1A1	-0.51952	0.0943104	-5.50861	1.82419e-07	236	0.184848	-0.704368	-0.334671	0
oid20145	Q9UMF0	ICAM5	0.397976	0.0726061	5.4813	2.06598e-07	236	0.142308	0.255668	0.540284	0
oid21447	P09758	TACSTD2	0.412842	0.0754969	5.46834	2.19149e-07	236	0.147974	0.264868	0.560816	0
oid21505	Q14508	WFDC2	0.456461	0.084209	5.42057	2.72155e-07	236	0.16505	0.291411	0.621511	0
oid21097	P00995	SPINK1	0.443493	0.0819241	5.41346	2.81052e-07	236	0.160571	0.282921	0.604064	0
oid20382	Q15485	FCN2	-0.425171	0.0786047	-5.40898	2.86798e-07	236	0.154065	-0.579237	-0.271106	0
oid20839	P30039	PBLD	-0.467878	0.0867897	-5.39094	3.11136e-07	236	0.170108	-0.637986	-0.29777	0.08
oid21152	Q8N149	LILRA2	-0.378261	0.0701874	-5.38931	3.13436e-07	236	0.137567	-0.515829	-0.240694	0
oid21153	Q6UXH9	PAMR1	-0.523696	0.0972178	-5.38683	3.16951e-07	236	0.190547	-0.714243	-0.333149	0
oid21139	P08648	ITGA5	-0.608663	0.113568	-5.35947	3.58509e-07	236	0.222593	-0.831255	-0.38607	0
oid20346	Q13508	ART3	0.444763	0.0838307	5.30549	4.56693e-07	236	0.164308	0.280454	0.609071	0
oid20159	P16112	ACAN	0.488847	0.0922499	5.29916	4.69794e-07	236	0.18081	0.308037	0.669656	0
oid20970	Q6UX15	LAYN	0.45748	0.0869238	5.263	5.52015e-07	236	0.170371	0.287109	0.62785	0
oid21500	Q9UBX1	CTSF	0.46582	0.0885723	5.25921	5.61401e-07	236	0.173602	0.292219	0.639422	0
oid21427	Q9UBG3	CRNN	0.378185	0.0720681	5.24761	5.91129e-07	236	0.141254	0.236932	0.519439	0
oid20133	P16234	PDGFRA	0.480134	0.0919181	5.2235	6.5788e-07	236	0.18016	0.299975	0.660294	0
oid20680	Q5ZPR3	CD276	0.396535	0.0760835	5.21184	6.92755e-07	236	0.149124	0.247411	0.545659	0
oid21060	P48052	CPA2	0.474496	0.0912133	5.20205	7.23427e-07	236	0.178778	0.295718	0.653274	0
oid20947	Q9H3S3	TMPRSS5	0.337163	0.0654186	5.15394	8.94474e-07	236	0.12822	0.208943	0.465383	0
oid21154	P04155	TFF1	0.406198	0.0788274	5.153	8.98151e-07	236	0.154502	0.251696	0.560699	0
oid21116	P14778	IL1R1	0.499169	0.0971532	5.13796	9.5956e-07	236	0.19042	0.308749	0.68959	0
oid20878	Q96FQ6	S100A16	0.517897	0.100932	5.13115	9.88655e-07	236	0.197827	0.320071	0.715724	0.264
oid20395	P55774	CCL18	-0.451803	0.0880594	-5.13066	9.90803e-07	236	0.172596	-0.624399	-0.279206	0
oid20886	Q9UJ72	ANXA10	0.501304	0.0977392	5.12899	9.98088e-07	236	0.191569	0.309735	0.692872	0.28
oid21454	O00292	LEFTY2	0.365715	0.0714367	5.11943	1.04083e-06	236	0.140016	0.225699	0.505731	0
oid20244	P23141	CES1	-0.392962	0.0775197	-5.06918	1.29641e-06	236	0.151939	-0.5449	-0.241023	0
oid20835	O60240	PLIN1	-0.52982	0.104665	-5.06204	1.33739e-06	236	0.205144	-0.734964	-0.324676	0.024
oid20333	P04746	AMY2A	0.38905	0.0770657	5.04829	1.41983e-06	236	0.151049	0.238001	0.540099	0
oid21498	P21589	NT5E	-0.439233	0.0871167	-5.04189	1.45988e-06	236	0.170749	-0.609982	-0.268484	0
oid20368	P35443	THBS4	-0.443877	0.088198	-5.03274	1.51908e-06	236	0.172868	-0.616745	-0.271009	0
oid20491	P09919	CSF3	-0.495526	0.0989107	-5.00983	1.67762e-06	236	0.193865	-0.689391	-0.301661	0
oid20998	Q96GW7	BCAN	0.353968	0.0708155	4.99845	1.76227e-06	236	0.138798	0.215169	0.492766	0
oid21453	Q00796	SORD	-0.495163	0.0993788	-4.98258	1.88728e-06	236	0.194782	-0.689945	-0.300381	0
oid20852	Q15043	SLC39A14	0.519383	0.104591	4.96582	2.02867e-06	236	0.204999	0.314384	0.724382	0
oid20238	P55058	PLTP	0.424264	0.0858699	4.94077	2.25941e-06	236	0.168305	0.255959	0.592569	0
oid20690	Q9BZZ2	SIGLEC1	-0.41699	0.0844027	-4.94048	2.26221e-06	236	0.165429	-0.582419	-0.251561	0
oid20303	P35590	TIE1	-0.493565	0.100257	-4.92299	2.43841e-06	236	0.196504	-0.690069	-0.297061	0
oid21147	Q99727	TIMP4	0.394703	0.0804775	4.90451	2.63912e-06	236	0.157736	0.236967	0.552439	0
oid20315	P05107	ITGB2	-0.438949	0.0895148	-4.90365	2.64884e-06	236	0.175449	-0.614398	-0.2635	0
oid20658	O00253	AGRP	0.476197	0.0974022	4.88897	2.82024e-06	236	0.190908	0.285288	0.667105	0
oid20694	Q14116	IL18	-0.372414	0.0768502	-4.84598	3.38645e-06	236	0.150626	-0.523041	-0.221788	0
oid21130	Q6UXG3	CD300LG	0.307788	0.0636575	4.83506	3.54693e-06	236	0.124769	0.183019	0.432557	0
oid21424	Q9BZR6	RTN4R	-0.435803	0.0903029	-4.82601	3.68562e-06	236	0.176994	-0.612796	-0.258809	0
oid21458	P62166	NCS1	0.416094	0.0867365	4.79722	4.16251e-06	236	0.170004	0.246091	0.586098	0
oid21507	Q14512	FGFBP1	0.354573	0.0744294	4.76388	4.78971e-06	236	0.145882	0.208691	0.500454	0
oid20687	P09238	MMP10	0.461903	0.0969765	4.76304	4.80679e-06	236	0.190074	0.271829	0.651976	0
oid20728	Q8WXD2	SCG3	0.346595	0.0727987	4.76101	4.84791e-06	236	0.142686	0.20391	0.489281	0
oid20275	P08118	MSMB	0.220272	0.0462837	4.75917	4.88546e-06	236	0.0907161	0.129556	0.310988	0
oid20940	Q9H5V8	CDCP1	-0.376455	0.0794914	-4.7358	5.3884e-06	236	0.155803	-0.532258	-0.220652	0
oid21491	P35916	FLT4	-0.416938	0.0884209	-4.71537	5.8688e-06	236	0.173305	-0.590243	-0.243633	0
oid20224	Q01973	ROR1	0.432606	0.0919559	4.7045	6.14121e-06	236	0.180233	0.252373	0.61284	0
oid20504	O43736	ITM2A	0.31346	0.066899	4.68556	6.64513e-06	236	0.131122	0.182338	0.444582	0
oid21333	Q8N386	LRRC25	-0.404708	0.0864128	-4.68343	6.70426e-06	236	0.169369	-0.574077	-0.235339	0
oid21488	Q9BYH1	SEZ6L	0.421245	0.0900354	4.67865	6.83874e-06	236	0.176469	0.244775	0.597714	0
oid20090	P55259	GP2	0.327676	0.0700525	4.67757	6.8696e-06	236	0.137303	0.190373	0.464979	0
oid20210	Q9UEW3	MARCO	-0.391869	0.0842695	-4.65018	7.69605e-06	236	0.165168	-0.557037	-0.2267	0
oid20734	Q9Y6N7	ROBO1	-0.421137	0.0907785	-4.63917	8.05477e-06	236	0.177926	-0.599063	-0.243211	0
oid21518	Q9UBX7	KLK11	0.405811	0.0877618	4.62401	8.5753e-06	236	0.172013	0.233798	0.577824	0
oid20847	Q03393	PTS	-0.435578	0.0945186	-4.60838	9.14564e-06	236	0.185256	-0.620834	-0.250321	0
oid20288	Q13822	ENPP2	-0.401182	0.0876823	-4.57541	1.04724e-05	236	0.171857	-0.573039	-0.229325	0
oid20255	Q03167	TGFBR3	0.412981	0.0903415	4.57133	1.06486e-05	236	0.177069	0.235912	0.590051	0
oid20511	O60542	PSPN	-0.214474	0.0469719	-4.566	1.08838e-05	236	0.092065	-0.306539	-0.122409	0
oid21376	Q99795	GPA33	0.365907	0.0801827	4.56342	1.09993e-05	236	0.157158	0.208749	0.523065	0
oid20871	P07196	NEFL	0.40349	0.088985	4.53436	1.23853e-05	236	0.174411	0.22908	0.577901	0.012
oid21250	Q9UQB8	BAIAP2	-0.442544	0.097671	-4.53097	1.25579e-05	236	0.191435	-0.633979	-0.251109	0.056
oid20493	P18564	ITGB6	0.418563	0.0925558	4.52228	1.30102e-05	236	0.181409	0.237153	0.599972	0
oid20191	O95502	NPTXR	0.423123	0.0936351	4.51885	1.31929e-05	236	0.183525	0.239598	0.606648	0
oid21095	O15394	NCAM2	0.381848	0.085157	4.48405	1.51936e-05	236	0.166908	0.21494	0.548756	0
oid20669	Q16719	KYNU	-0.389988	0.087069	-4.47906	1.55032e-05	236	0.170655	-0.560643	-0.219332	0
oid20294	P04080	CSTB	-0.359946	0.0805608	-4.468	1.62124e-05	236	0.157899	-0.517845	-0.202046	0
oid21257	P06850	CRH	0.374144	0.083786	4.46547	1.63784e-05	236	0.164221	0.209924	0.538365	0
oid20208	P02462	COL4A1	0.441595	0.0993345	4.44554	1.77493e-05	236	0.194696	0.246899	0.63629	0
oid21126	Q9NPH3	IL1RAP	0.29504	0.0663768	4.44492	1.77935e-05	236	0.130099	0.164941	0.425138	0
oid21343	Q9BSG5	RTBDN	0.401948	0.0906034	4.43634	1.84181e-05	236	0.177583	0.224365	0.57953	0
oid20168	Q16820	MEP1B	-0.26605	0.0601706	-4.4216	1.95418e-05	236	0.117934	-0.383985	-0.148116	0.036
oid21390	Q9Y336	SIGLEC9	-0.323438	0.0731888	-4.41922	1.97287e-05	236	0.14345	-0.466888	-0.179988	0
oid21098	Q9UGT4	SUSD2	0.346851	0.0787504	4.40444	2.09324e-05	236	0.154351	0.192501	0.501202	0
oid20416	Q92820	GGH	-0.389369	0.0884695	-4.40117	2.12079e-05	236	0.1734	-0.56277	-0.215969	0
oid20274	P14555	PLA2G2A	-0.430606	0.0978675	-4.39989	2.13171e-05	236	0.19182	-0.622426	-0.238786	0
oid20256	P04275	VWF	-0.351554	0.0799323	-4.39815	2.14659e-05	236	0.156667	-0.508221	-0.194887	0
oid20748	P56470	LGALS4	0.395267	0.0903793	4.37342	2.36925e-05	236	0.177143	0.218123	0.57241	0
oid20595	Q8TD46	CD200R1	-0.30269	0.0692586	-4.37042	2.39773e-05	236	0.135747	-0.438436	-0.166943	0
oid20111	P22004	BMP6	0.370519	0.0848664	4.3659	2.44128e-05	236	0.166338	0.20418	0.536857	0
oid20714	P34896	SHMT1	-0.386945	0.0887739	-4.35877	2.51156e-05	236	0.173997	-0.560942	-0.212948	0
oid20987	P56279	TCL1A	-0.346532	0.0795204	-4.35778	2.52146e-05	236	0.15586	-0.502392	-0.190672	0
oid21520	P04626	ERBB2	-0.427474	0.0981589	-4.35492	2.55027e-05	236	0.192391	-0.619866	-0.235083	0
oid21526	Q92876	KLK6	0.374025	0.0860789	4.34515	2.65119e-05	236	0.168715	0.205311	0.54274	0
oid20766	P51888	PRELP	0.37572	0.086722	4.33247	2.78782e-05	236	0.169975	0.205745	0.545696	0
oid20759	Q9HCB6	SPON1	0.382562	0.0884786	4.32378	2.8854e-05	236	0.173418	0.209144	0.55598	0
oid20193	Q9HBB8	CDHR5	-0.410348	0.0957271	-4.28664	3.34057e-05	236	0.187625	-0.597973	-0.222723	0
oid20155	Q8WX77	IGFBPL1	0.391548	0.0920132	4.25534	3.77712e-05	236	0.180346	0.211202	0.571894	0
oid20134	Q12864	CDH17	0.395792	0.0932926	4.24248	3.97208e-05	236	0.182853	0.212938	0.578645	0
oid20954	P48740	MASP1	-0.420166	0.0993639	-4.22856	4.19384e-05	236	0.194753	-0.614919	-0.225413	0
oid20247	P00750	PLAT	-0.406471	0.0962204	-4.22437	4.26285e-05	236	0.188592	-0.595062	-0.217879	0
oid20459	Q03426	MVK	-0.360702	0.0857769	-4.20512	4.59449e-05	236	0.168123	-0.528824	-0.192579	0.02
oid20128	P48357	LEPR	0.465638	0.111235	4.18607	4.94673e-05	236	0.21802	0.247617	0.683658	0
oid20253	Q9UM47	NOTCH3	0.313689	0.0752173	4.17043	5.25528e-05	236	0.147426	0.166263	0.461115	0
oid21262	Q96PQ0	SORCS2	0.351312	0.0843218	4.16633	5.33929e-05	236	0.165271	0.186042	0.516583	0
oid21171	P06731	CEACAM5	0.301647	0.0725	4.16064	5.45779e-05	236	0.1421	0.159547	0.443747	0.256
oid20688	P11684	SCGB1A1	0.28499	0.068552	4.15729	5.52889e-05	236	0.134362	0.150628	0.419352	0
oid20340	P19961	AMY2B	0.314021	0.0756118	4.15307	5.61951e-05	236	0.148199	0.165822	0.46222	0
oid20727	P22466	GAL	0.31873	0.0768772	4.14597	5.77533e-05	236	0.150679	0.168051	0.46941	0
oid20366	O00533	CHL1	0.346636	0.0836696	4.14291	5.84362e-05	236	0.163992	0.182643	0.510628	0
oid20976	P78423	CX3CL1	0.382341	0.0926694	4.12586	6.23933e-05	236	0.181632	0.200709	0.563973	0
oid21096	P23280	CA6	0.217238	0.0527925	4.11494	6.5061e-05	236	0.103473	0.113765	0.320711	0
oid21247	P14136	GFAP	0.377491	0.0918275	4.11086	6.60845e-05	236	0.179982	0.197509	0.557472	0.156
oid20464	P48061	CXCL12	0.374592	0.0912289	4.10607	6.73076e-05	236	0.178809	0.195784	0.553401	0
oid20301	Q8N423	LILRB2	-0.278541	0.0678958	-4.10248	6.82376e-05	236	0.133076	-0.411617	-0.145466	0
oid21365	P50120	RBP2	0.419069	0.102172	4.1016	6.84694e-05	236	0.200258	0.218812	0.619327	0
oid20209	A6NI73	LILRA5	-0.333361	0.0816394	-4.08334	7.34117e-05	236	0.160013	-0.493374	-0.173348	0
oid21123	P20774	OGN	0.332855	0.0815674	4.08074	7.41422e-05	236	0.159872	0.172983	0.492727	0
oid21057	Q16288	NTRK3	0.39062	0.0958844	4.07386	7.61093e-05	236	0.187933	0.202686	0.578553	0
oid20612	O15455	TLR3	-0.216869	0.0533901	-4.06197	7.96278e-05	236	0.104645	-0.321514	-0.112225	0
oid21395	Q9UJM8	HAO1	-0.324703	0.0801962	-4.04886	8.36878e-05	236	0.157184	-0.481888	-0.167519	0
oid20371	Q07654	TFF3	0.391377	0.0969279	4.03781	8.72634e-05	236	0.189979	0.201398	0.581356	0
oid20352	Q06033	ITIH3	0.349802	0.0872246	4.01037	9.67897e-05	236	0.17096	0.178842	0.520763	0
oid20649	P30203	CD6	-0.252233	0.0630327	-4.00163	0.000100025	236	0.123544	-0.375777	-0.128689	0
oid20355	P18428	LBP	-0.409785	0.102584	-3.99463	0.000102689	236	0.201065	-0.61085	-0.208721	0
oid21383	P05187	ALPP	0.223801	0.056126	3.98747	0.000105487	236	0.110007	0.113794	0.333808	0
oid20873	Q6UWL6	KIRREL2	0.412022	0.103461	3.9824	0.000107512	236	0.202783	0.209239	0.614806	0.004
oid21490	Q96NY8	NECTIN4	0.355251	0.089644	3.96291	0.000115648	236	0.175702	0.179549	0.530954	0
oid20933	O60609	GFRA3	0.349279	0.0884282	3.94986	0.00012142	236	0.173319	0.17596	0.522599	0
oid21429	Q96JA1	LRIG1	-0.288862	0.0735014	-3.93002	0.000130728	236	0.144063	-0.432925	-0.144799	0
oid20411	P05362	ICAM1	-0.378824	0.0964908	-3.92601	0.000132689	236	0.189122	-0.567946	-0.189702	0
oid21389	Q14213_Q8NEV9	EBI3_IL27	0.289323	0.07431	3.89345	0.000149687	236	0.145648	0.143675	0.43497	0
oid20198	Q15846	CLUL1	0.262095	0.0673251	3.89298	0.00014995	236	0.131957	0.130138	0.394052	0
oid20948	Q53H47	SETMAR	-0.376336	0.0968219	-3.88689	0.000153356	236	0.189771	-0.566107	-0.186565	0
oid20399	P36222	CHI3L1	0.326309	0.0839634	3.88632	0.000153682	236	0.164568	0.16174	0.490877	0
oid20196	P21583	KITLG	0.377418	0.0973996	3.87495	0.000160255	236	0.190903	0.186515	0.568322	0
oid20578	Q14773	ICAM4	0.276884	0.0715402	3.87033	0.000163002	236	0.140219	0.136665	0.417103	0
oid21362	Q9UBM4	OPTC	0.307163	0.0794835	3.86449	0.000166539	236	0.155788	0.151376	0.462951	0
oid21092	Q9P232	CNTN3	-0.34318	0.0888923	-3.86063	0.00016892	236	0.174229	-0.517409	-0.168951	0
oid20808	Q96JP9	CDHR1	-0.348249	0.0903684	-3.85367	0.000173288	236	0.177122	-0.525371	-0.171128	0
oid21504	P78552	IL13RA1	-0.403103	0.105271	-3.82919	0.000189527	236	0.206331	-0.609434	-0.196771	0
oid20971	O76070	SNCG	-0.249606	0.0652099	-3.82773	0.000190541	236	0.127811	-0.377417	-0.121794	0
oid20137	Q03154	ACY1	-0.34483	0.0906038	-3.80591	0.000206305	236	0.177583	-0.522413	-0.167246	0
oid20826	P20936	RASA1	0.455436	0.120555	3.77783	0.000228427	236	0.236288	0.219148	0.691723	0.924
oid20902	P63098	PPP3R1	-0.352061	0.0932054	-3.77725	0.0002289	236	0.182683	-0.534743	-0.169378	0
oid20834	P29474	NOS3	-0.382729	0.101668	-3.7645	0.000239695	236	0.199269	-0.581998	-0.18346	0.04
oid20374	O95445	APOM	0.383496	0.101879	3.76424	0.000239921	236	0.199682	0.183814	0.583179	0
oid21306	P05937	CALB1	0.307641	0.0823355	3.73643	0.000265189	236	0.161377	0.146263	0.469018	0
oid20804	Q9NSK7	C19orf12	-0.363954	0.0974914	-3.73319	0.000268294	236	0.191083	-0.555037	-0.17287	0.056
oid21083	P08254	MMP3	0.279699	0.07503	3.72783	0.000273496	236	0.147059	0.132641	0.426758	0
oid20354	P13591	NCAM1	0.329109	0.0883048	3.72696	0.00027435	236	0.173077	0.156031	0.502186	0
oid21113	Q14126	DSG2	0.323483	0.0868333	3.72534	0.000275954	236	0.170193	0.15329	0.493676	0
oid20347	Q96KN2	CNDP1	-0.368319	0.0989375	-3.72274	0.00027853	236	0.193918	-0.562237	-0.174402	0
oid21267	Q13145	BAMBI	0.381116	0.102611	3.71418	0.000287198	236	0.201117	0.179998	0.582233	0.964
oid21407	Q9P0G3	KLK14	0.279713	0.0756308	3.6984	0.000303849	236	0.148236	0.131477	0.42795	0
oid20906	Q86WV1	SKAP1	-0.313666	0.0850508	-3.68798	0.000315344	236	0.1667	-0.480365	-0.146966	0.024
oid21456	P16562	CRISP2	0.147185	0.0399903	3.68053	0.00032381	236	0.078381	0.0688045	0.225566	0
oid21364	P98073	TMPRSS15	-0.323729	0.088317	-3.66554	0.000341508	236	0.173101	-0.496831	-0.150628	0.008
oid21486	P41271	NBL1	0.323785	0.0885255	3.65753	0.000351335	236	0.17351	0.150275	0.497295	0
oid20323	Q8NHL6	LILRB1	-0.297591	0.0817886	-3.63853	0.000375723	236	0.160306	-0.457896	-0.137285	0
oid20732	Q8WU39	MZB1	-0.29369	0.0810904	-3.62177	0.000398574	236	0.158937	-0.452628	-0.134753	0
oid21148	Q9NQ38	SPINK5	0.30134	0.0832587	3.61931	0.000402023	236	0.163187	0.138152	0.464527	0
oid20364	P07478	PRSS2	0.359295	0.0993506	3.61644	0.000406109	236	0.194727	0.164568	0.554022	0
oid20656	P14210	HGF	-0.307782	0.0851765	-3.61347	0.000410366	236	0.166946	-0.474728	-0.140836	0
oid21054	P14384	CPM	-0.3366	0.0935153	-3.59941	0.000431088	236	0.18329	-0.51989	-0.15331	0
oid21497	P35968	KDR	-0.352413	0.0979339	-3.59848	0.000432495	236	0.19195	-0.544364	-0.160463	0
oid20201	P00797	REN	-0.29816	0.082894	-3.59689	0.000434915	236	0.162472	-0.460633	-0.135688	0
oid21446	Q9NS68	TNFRSF19	0.322383	0.0897153	3.5934	0.00044025	236	0.175842	0.146541	0.498225	0
oid20269	P08581	MET	0.356485	0.0994658	3.584	0.000454952	236	0.194953	0.161532	0.551438	0
oid20726	Q9UKU9	ANGPTL2	-0.325491	0.0909472	-3.57891	0.000463106	236	0.178257	-0.503748	-0.147235	0
oid21357	P15514	AREG	0.354689	0.099244	3.57391	0.000471237	236	0.194518	0.160171	0.549207	0
oid20281	Q86U17	SERPINA11	0.287873	0.0805941	3.57189	0.000474575	236	0.157964	0.129908	0.445837	0
oid21235	Q9Y639	NPTN	0.342188	0.096028	3.56342	0.000488767	236	0.188215	0.153973	0.530403	0.332
oid21415	Q9BXY4	RSPO3	0.338162	0.0949544	3.56131	0.000492351	236	0.186111	0.152052	0.524273	0
oid20337	P42785	PRCP	-0.33247	0.0938284	-3.54339	0.000523945	236	0.183904	-0.516374	-0.148567	0
oid20217	P09601	HMOX1	0.323409	0.0915182	3.53382	0.000541579	236	0.179376	0.144033	0.502784	0
oid20887	P30519	HMOX2	0.392029	0.111148	3.52709	0.000554314	236	0.21785	0.174179	0.609879	0
oid21409	Q9H156	SLITRK2	-0.261206	0.0741771	-3.52138	0.000565343	236	0.145387	-0.406593	-0.115819	0
oid20164	P51693	APLP1	0.38178	0.108487	3.51913	0.000569749	236	0.212635	0.169145	0.594415	0
oid21158	P22692	IGFBP4	0.317694	0.0903897	3.51472	0.000578474	236	0.177164	0.14053	0.494858	0
oid20387	O75015	FCGR3B	-0.218935	0.0623973	-3.50872	0.00059053	236	0.122299	-0.341234	-0.0966361	0
oid20242	P54760	EPHB4	0.337275	0.0962568	3.50391	0.000600378	236	0.188663	0.148612	0.525938	0
oid21494	Q92832	NELL1	-0.275078	0.0785116	-3.50366	0.000600892	236	0.153883	-0.428961	-0.121195	0
oid21298	Q9UJ71	CD207	0.29736	0.0849316	3.50117	0.000606064	236	0.166466	0.130894	0.463826	0
oid21380	Q13421	MSLN	0.24314	0.0694982	3.49851	0.000611626	236	0.136216	0.106923	0.379356	0
oid21064	P57087	JAM2	0.303448	0.0869213	3.49107	0.000627434	236	0.170366	0.133082	0.473814	0
oid21028	P17405	SMPD1	0.317953	0.0911939	3.48656	0.000637196	236	0.17874	0.139213	0.496693	0
oid20200	P12104	FABP2	0.364424	0.104749	3.47901	0.000653866	236	0.205308	0.159115	0.569732	0
oid20605	P24001	IL32	0.320646	0.0921899	3.4781	0.000655905	236	0.180692	0.139954	0.501338	0
oid21296	P05783	KRT18	-0.313562	0.0901935	-3.47655	0.000659393	236	0.176779	-0.490341	-0.136783	0
oid21093	P55103	INHBC	-0.34442	0.0992437	-3.47045	0.000673276	236	0.194518	-0.538938	-0.149903	0
oid21480	Q7Z4W1	DCXR	-0.318495	0.0922073	-3.45412	0.000711802	236	0.180726	-0.499221	-0.137769	0
oid21048	Q96GP6	SCARF2	0.277344	0.0803562	3.45143	0.000718361	236	0.157498	0.119845	0.434842	0
oid20233	Q92520	FAM3C	0.35545	0.103466	3.43543	0.000758439	236	0.202793	0.152657	0.558243	0
oid21474	Q96PD2	DCBLD2	0.310851	0.0905122	3.43436	0.000761219	236	0.177404	0.133447	0.488255	0
oid21425	Q96I15	SCLY	-0.327335	0.095504	-3.42745	0.000779238	236	0.187188	-0.514523	-0.140147	0
oid20720	O43291	SPINT2	0.336	0.0983574	3.41611	0.00080968	236	0.19278	0.143219	0.52878	0
oid20289	P15086	CPB1	0.324682	0.0950753	3.415	0.000812721	236	0.186348	0.138334	0.51103	0
oid21074	Q15818	NPTX1	0.229551	0.0672753	3.41212	0.000820658	236	0.131859	0.0976916	0.361411	0
oid20353	P12830	CDH1	0.360808	0.105845	3.40885	0.000829762	236	0.207455	0.153353	0.568264	0
oid21071	P11215	ITGAM	-0.323477	0.0950285	-3.404	0.000843422	236	0.186256	-0.509733	-0.137221	0
oid20125	NTproBNP	NTproBNP	0.282814	0.083357	3.3928	0.000875816	236	0.16338	0.119434	0.446193	0.308
oid20939	Q96NZ8	WFIKKN1	-0.261731	0.0772118	-3.38978	0.000884731	236	0.151335	-0.413067	-0.110396	0
oid21094	Q96FE7	PIK3IP1	0.294254	0.0868586	3.38773	0.000890843	236	0.170243	0.124011	0.464496	0
oid20153	P10145	CXCL8	0.371016	0.110105	3.36967	0.00094643	236	0.215805	0.155211	0.58682	0
oid20448	Q969V3	NCLN	0.28503	0.0845982	3.36921	0.000947861	236	0.165812	0.119217	0.450842	0.82
oid20328	Q16663	CCL15	0.268093	0.0796695	3.36507	0.000961092	236	0.156152	0.111941	0.424246	0
oid21044	Q6P4E1	GOLM2	-0.34331	0.10208	-3.36316	0.000967236	236	0.200076	-0.543386	-0.143234	0
oid20593	Q29980_Q29983	MICB_MICA	-0.173083	0.0516107	-3.35362	0.000998503	236	0.101157	-0.27424	-0.071926	0.024
oid20404	Q9UGM5	FETUB	-0.326645	0.0975929	-3.34702	0.00102073	236	0.191282	-0.517927	-0.135363	0
oid20856	Q07812	BAX	0.355135	0.106321	3.34022	0.00104407	236	0.208389	0.146746	0.563524	0.176
oid20888	Q86Z14	KLB	0.253696	0.0760024	3.338	0.00105178	236	0.148965	0.104731	0.402661	0.052
oid20105	Q9BYF1	ACE2	-0.273839	0.0825695	-3.31647	0.0011296	236	0.161836	-0.435675	-0.112003	0.004
oid20623	Q9Y266	NUDC	-0.36515	0.110379	-3.30814	0.0011611	236	0.216343	-0.581494	-0.148807	0
oid20330	Q12884	FAP	-0.319569	0.0967288	-3.30376	0.00117802	236	0.189588	-0.509157	-0.12998	0
oid20410	P06681	C2	-0.342612	0.103886	-3.29795	0.00120079	236	0.203617	-0.54623	-0.138995	0
oid20393	P20023	CR2	-0.24477	0.0746227	-3.28011	0.00127336	236	0.14626	-0.391031	-0.0985098	0
oid21340	Q6UWW8	CES3	-0.30126	0.0919184	-3.27747	0.0012844	236	0.18016	-0.48142	-0.1211	0.084
oid20631	P10145	CXCL8	0.349688	0.10675	3.27577	0.0012916	236	0.20923	0.140458	0.558918	0
oid20096	P20718	GZMH	-0.20948	0.0642142	-3.26221	0.00135022	236	0.12586	-0.33534	-0.0836205	0
oid20369	P02786	TFRC	-0.328183	0.100603	-3.26217	0.00135042	236	0.197182	-0.525365	-0.131002	0
oid20351	A1L4H1	SSC5D	-0.267986	0.082316	-3.25558	0.0013798	236	0.161339	-0.429326	-0.106647	0
oid20280	P15085	CPA1	0.307667	0.0946236	3.25149	0.00139835	236	0.185462	0.122205	0.49313	0
oid20775	P54317	PNLIPRP2	0.179158	0.055117	3.2505	0.00140287	236	0.108029	0.0711283	0.287187	0.112
oid20170	P19022	CDH2	-0.342252	0.105701	-3.23792	0.00146153	236	0.207174	-0.549426	-0.135077	0
oid20488	P01583	IL1A	0.388734	0.120181	3.23458	0.00147749	236	0.235554	0.153179	0.624288	0.804
oid21069	P01215	CGA	0.229048	0.0711699	3.21833	0.00155746	236	0.139493	0.0895549	0.368541	0
oid20174	P09417	QDPR	-0.347378	0.108018	-3.21592	0.00156964	236	0.211716	-0.559094	-0.135662	0
oid20222	Q92692	NECTIN2	0.316922	0.0985665	3.21531	0.00157273	236	0.19319	0.123732	0.510113	0
oid20562	P40933	IL15	0.327455	0.102334	3.19987	0.00165316	236	0.200574	0.126881	0.528029	0
oid20765	O00626	CCL22	-0.334212	0.104517	-3.19769	0.00166482	236	0.204852	-0.539064	-0.129359	0
oid20618	P68106	FKBP1B	0.378233	0.118376	3.19518	0.00167838	236	0.232017	0.146216	0.61025	0.992
oid20241	P22748	CA4	0.311442	0.0975722	3.19191	0.00169613	236	0.191241	0.1202	0.502683	0
oid21327	P29459_P29460	IL12A_IL12B	-0.248093	0.0778567	-3.18653	0.00172573	236	0.152599	-0.400692	-0.0954938	0
oid20513	O43521-2	BCL2L11	0.33492	0.105234	3.18263	0.00174751	236	0.206258	0.128662	0.541178	0
oid20367	Q9BXJ1	C1QTNF1	-0.335755	0.105717	-3.17597	0.00178531	236	0.207206	-0.542961	-0.128549	0
oid20528	P23229	ITGA6	0.354375	0.111676	3.17325	0.00180091	236	0.218884	0.135491	0.573259	0.192
oid21197	Q9Y243	AKT3	0.373659	0.117933	3.16841	0.0018291	236	0.231148	0.142511	0.604807	0.948
oid20978	P02771	AFP	0.228004	0.0720483	3.1646	0.00185155	236	0.141215	0.0867891	0.369219	0
oid21045	Q6NW40	RGMB	0.310977	0.0983068	3.16333	0.00185908	236	0.192681	0.118295	0.503658	0
oid20917	Q8NBI3	DRAXIN	0.266392	0.0845741	3.1498	0.00194114	236	0.165765	0.100627	0.432157	0
oid20574	P13725	OSM	-0.273527	0.0868909	-3.14794	0.00195271	236	0.170306	-0.443834	-0.103221	0
oid20067	Q96N03	VSTM2L	-0.343212	0.109394	-3.13739	0.00201942	236	0.214412	-0.557624	-0.128799	0.768
oid20622	Q6UXB2	CXCL17	0.194476	0.0620515	3.1341	0.00204068	236	0.121621	0.0728545	0.316097	0
oid20194	P52888	THOP1	-0.330314	0.105665	-3.12604	0.00209358	236	0.207104	-0.537418	-0.12321	0
oid20974	O60242	ADGRB3	0.247998	0.0794425	3.12173	0.0021224	236	0.155707	0.0922905	0.403705	0
oid20561	P78310	CXADR	0.270493	0.0867779	3.11708	0.00215388	236	0.170085	0.100409	0.440578	0
oid20541	P12872	MLN	0.161696	0.0518808	3.11668	0.00215657	236	0.101686	0.0600098	0.263383	0
oid20272	Q9Y275	TNFSF13B	-0.272266	0.0875376	-3.11027	0.00220075	236	0.171574	-0.44384	-0.100692	0
oid21430	P10145	CXCL8	0.343223	0.110637	3.10224	0.00225732	236	0.216849	0.126374	0.560072	0
oid20523	P80098	CCL7	-0.279317	0.0902812	-3.09386	0.00231772	236	0.176951	-0.456268	-0.102366	0
oid20296	P08236	GUSB	-0.253883	0.0820674	-3.09359	0.00231971	236	0.160852	-0.414735	-0.0930307	0
oid21487	Q9NZ53	PODXL2	0.290548	0.0941161	3.08713	0.00236736	236	0.184468	0.106081	0.475016	0
oid21392	P16870	CPE	0.295787	0.0959716	3.08202	0.00240563	236	0.188104	0.107682	0.483891	0
oid20938	Q2MKA7	RSPO1	0.315165	0.102395	3.07792	0.00243683	236	0.200695	0.11447	0.51586	0
oid21037	P06733	ENO1	-0.345786	0.113023	-3.05945	0.00258194	236	0.221524	-0.56731	-0.124262	0
oid20104	O75356	ENTPD5	0.295958	0.0967424	3.05924	0.00258364	236	0.189615	0.106343	0.485573	0
oid21007	Q9HCK4	ROBO2	-0.312198	0.102282	-3.05233	0.0026399	236	0.200472	-0.51267	-0.111726	0
oid20610	P10147	CCL3	-0.293101	0.096259	-3.04492	0.00270164	236	0.188668	-0.481768	-0.104433	0
oid20391	P12318	FCGR2A	-0.228176	0.0751735	-3.03532	0.00278349	236	0.14734	-0.375516	-0.0808358	0
oid21368	O00622	CCN1	0.31187	0.102989	3.0282	0.00284575	236	0.201858	0.110012	0.513728	0
oid20997	P10145	CXCL8	0.337172	0.111511	3.02366	0.00288608	236	0.218562	0.11861	0.555735	0
oid21439	P39900	MMP12	0.245792	0.0813079	3.02297	0.0028922	236	0.159363	0.0864282	0.405155	0
oid21441	O60243	HS6ST1	0.317256	0.105168	3.01664	0.00294947	236	0.20613	0.111125	0.523386	0
oid20731	Q9NZC2	TREM2	-0.258405	0.0858167	-3.01112	0.00300022	236	0.168201	-0.426605	-0.0902038	0
oid20754	Q4KMG0	CDON	-0.292971	0.0973496	-3.00948	0.00301551	236	0.190805	-0.483777	-0.102166	0
oid20076	P51161	FABP6	0.277704	0.0930959	2.98299	0.00327172	236	0.182468	0.095236	0.460172	0.092
oid20880	Q13308	PTK7	0.374274	0.12554	2.9813	0.00328867	236	0.246059	0.128215	0.620334	0.348
oid20592	O14788	TNFSF11	-0.275772	0.092545	-2.97987	0.00330322	236	0.181388	-0.45716	-0.0943835	0
oid20881	P23276	KEL	-0.247639	0.0835006	-2.96572	0.00344941	236	0.163661	-0.411301	-0.0839783	0.028
oid21168	P01242	GH2	-0.221402	0.0751872	-2.94468	0.0036779	236	0.147367	-0.368769	-0.0740354	0.528
oid21406	P47929	LGALS7_LGALS7B	0.239626	0.0815707	2.93764	0.00375738	236	0.159878	0.0797471	0.399504	0
oid20664	Q9H4D0	CLSTN2	0.250837	0.0856031	2.93023	0.00384288	236	0.167782	0.0830545	0.418619	0
oid21136	P16871	IL7R	0.206431	0.070576	2.92494	0.00390487	236	0.138329	0.0681018	0.34476	0
oid20667	Q15517	CDSN	0.193986	0.0664739	2.91823	0.00398499	236	0.130289	0.063697	0.324275	0
oid20994	P12644	BMP4	0.308225	0.105644	2.91758	0.00399283	236	0.207063	0.101162	0.515288	0
oid20079	P62736	ACTA2	0.22706	0.0779821	2.9117	0.00406434	236	0.152845	0.0742153	0.379905	0.044
oid20901	P52943	CRIP2	0.262009	0.0899871	2.91162	0.00406524	236	0.176375	0.0856338	0.438383	0
oid21423	Q10471	GALNT2	0.212624	0.0730636	2.91012	0.00408367	236	0.143205	0.0694195	0.355829	0
oid20735	O00300	TNFRSF11B	0.248688	0.0855524	2.90685	0.00412419	236	0.167683	0.0810051	0.416371	0
oid20075	P35218	CA5A	-0.242923	0.0843401	-2.88028	0.00446682	236	0.165307	-0.408229	-0.0776161	0.004
oid20576	P24394	IL4R	0.268246	0.0932959	2.87522	0.00453496	236	0.18286	0.0853858	0.451106	0
oid21106	Q15155	NOMO1	-0.298374	0.10384	-2.87339	0.00455972	236	0.203527	-0.5019	-0.0948469	0
oid21386	Q9NTU7	CBLN4	-0.235626	0.0821272	-2.86904	0.00461943	236	0.160969	-0.396595	-0.0746567	0
oid20172	Q96LA6	FCRL1	-0.256176	0.0894195	-2.86488	0.00467709	236	0.175262	-0.431439	-0.080914	0
oid20551	Q9HD26	GOPC	-0.310684	0.108725	-2.85751	0.00478087	236	0.213102	-0.523786	-0.0975825	0.656
oid21050	P04216	THY1	-0.246908	0.0865058	-2.85423	0.00482777	236	0.169551	-0.416459	-0.0773564	0
oid21350	P07948	LYN	-0.352844	0.124187	-2.84122	0.00501794	236	0.243407	-0.596252	-0.109437	0.008
oid20689	Q6UWV6	ENPP7	-0.189286	0.0666578	-2.83966	0.00504123	236	0.130649	-0.319935	-0.0586363	0
oid20319	P00533	EGFR	-0.323526	0.114034	-2.8371	0.00507969	236	0.223507	-0.547033	-0.100019	0
oid21287	O95831	AIFM1	-0.294693	0.104016	-2.83314	0.00513946	236	0.203872	-0.498564	-0.090821	0.396
oid20211	O95841	ANGPTL1	0.295772	0.104456	2.83156	0.00516363	236	0.204733	0.0910392	0.500506	0
oid20570	P26022	PTX3	0.292559	0.103434	2.82847	0.00521103	236	0.20273	0.0898289	0.49529	0
oid20152	Q99674	CGREF1	0.235426	0.0835948	2.81627	0.00540192	236	0.163846	0.07158	0.399271	0
oid21345	P49441	INPP1	-0.306316	0.109212	-2.80478	0.00558769	236	0.214056	-0.520372	-0.0922603	0.384
oid20704	O76096	CST7	-0.168349	0.0601254	-2.79996	0.00566737	236	0.117846	-0.286194	-0.0505028	0
oid20757	P27930	IL1R2	-0.300036	0.107384	-2.79404	0.00576647	236	0.210473	-0.510508	-0.0895631	0
oid21047	P01178	OXT	-0.203086	0.0727623	-2.79108	0.00581669	236	0.142614	-0.3457	-0.0604716	0
oid21508	O43895	XPNPEP2	0.0939171	0.0337075	2.78624	0.00589979	236	0.0660668	0.0278504	0.159984	0
oid20699	O75462	CRLF1	-0.282961	0.101617	-2.78458	0.00592848	236	0.19917	-0.48213	-0.083791	0
oid20407	Q9Y5C1	ANGPTL3	0.271891	0.0979296	2.7764	0.00607175	236	0.191942	0.0799493	0.463833	0
oid20458	O95715	CXCL14	0.262371	0.0946352	2.77244	0.00614211	236	0.185485	0.0768858	0.447856	0.412
oid21030	Q99731	CCL19	-0.255762	0.0923453	-2.76963	0.00619267	236	0.180997	-0.436759	-0.0747654	0
oid20335	P02452	COL1A1	0.294496	0.106657	2.76115	0.00634726	236	0.209048	0.0854484	0.503544	0
oid20119	P34913	EPHX2	-0.228367	0.082871	-2.75569	0.00644872	236	0.162427	-0.390794	-0.0659394	0.828
oid20990	P07306	ASGR1	-0.252518	0.0916795	-2.75435	0.00647373	236	0.179692	-0.43221	-0.0728259	0
oid21029	Q10589	BST2	-0.227062	0.0827434	-2.74417	0.00666757	236	0.162177	-0.389239	-0.0648846	0
oid20801	P22676	CALB2	-0.302231	0.110485	-2.73549	0.00683676	236	0.21655	-0.518781	-0.0856802	0.036
oid20324	O75023	LILRB5	-0.142472	0.0521265	-2.7332	0.00688206	236	0.102168	-0.24464	-0.0403044	0
oid21342	P29317	EPHA2	0.276582	0.10151	2.72467	0.00705344	236	0.19896	0.0776215	0.475542	0
oid20770	P19883	FST	-0.290612	0.106683	-2.72407	0.00706557	236	0.209099	-0.499711	-0.0815132	0
oid20810	P08758	ANXA5	0.325034	0.120719	2.69248	0.00773504	236	0.23661	0.088424	0.561644	0.7
oid21191	Q9NS15	LTBP3	-0.199998	0.0744331	-2.68694	0.00785798	236	0.145889	-0.345886	-0.0541088	0
oid21177	P49788	RARRES1	0.244764	0.0912817	2.68142	0.00798265	236	0.178912	0.0658521	0.423676	0.368
oid20477	Q9P0M4	IL17C	0.27243	0.101731	2.67796	0.00806152	236	0.199392	0.0730384	0.471822	0
oid21418	Q496F6	CD300E	-0.226737	0.0846896	-2.67727	0.00807743	236	0.165992	-0.392728	-0.0607449	0
oid21523	O43240	KLK10	0.222118	0.0830682	2.67393	0.00815441	236	0.162814	0.0593046	0.384932	0
oid20733	O75888	TNFSF13	0.250253	0.0936845	2.67123	0.00821701	236	0.183622	0.0666314	0.433875	0
oid21012	Q8NBS9	TXNDC5	0.280495	0.105122	2.66827	0.00828633	236	0.20604	0.0744551	0.486535	0.008
oid20771	Q9BU40	CHRDL1	0.242756	0.0909917	2.66789	0.00829529	236	0.178344	0.064412	0.421099	0
oid20660	P43234	CTSO	-0.264628	0.0993543	-2.66347	0.00839976	236	0.194734	-0.459362	-0.069893	0
oid20273	Q13740	ALCAM	-0.262056	0.0984418	-2.66204	0.00843395	236	0.192946	-0.455002	-0.0691098	0
oid20349	P00740	F9	-0.284356	0.107157	-2.65364	0.00863647	236	0.210027	-0.494383	-0.0743287	0
oid21025	P28906	CD34	0.264998	0.100216	2.64427	0.00886785	236	0.196423	0.0685748	0.461421	0
oid20816	P13385	TDGF1	0.125411	0.0474958	2.64047	0.00896327	236	0.0930919	0.0323195	0.218503	0.176
oid20823	Q9BXS1	IDI2	0.24807	0.0941554	2.63468	0.00911036	236	0.184545	0.0635249	0.432614	0.872
oid20259	P55808	XG	0.189963	0.0722573	2.62898	0.00925745	236	0.141624	0.0483385	0.331587	0
oid20952	P40222	TXLNA	-0.267122	0.101767	-2.62485	0.00936525	236	0.199463	-0.466585	-0.0676594	0
oid21527	P26842	CD27	0.222778	0.0849137	2.62358	0.00939862	236	0.166431	0.0563469	0.389208	0
oid20199	P23526	AHCY	-0.312745	0.119256	-2.62247	0.00942794	236	0.233742	-0.546487	-0.0790032	0.332
oid21318	Q49AH0	CDNF	0.251416	0.0960223	2.6183	0.00953845	236	0.188204	0.0632118	0.439619	0
oid20285	Q9H1U4	MEGF9	-0.272244	0.104285	-2.61057	0.0097467	236	0.204399	-0.476643	-0.0678453	0
oid21437	P50579	METAP2	-0.270135	0.103484	-2.6104	0.00975155	236	0.202829	-0.472965	-0.0673058	0
oid20577	Q9NWZ3	IRAK4	-0.298755	0.114528	-2.60857	0.00980144	236	0.224476	-0.523231	-0.0742794	0.016
oid21035	P13473	LAMP2	-0.266163	0.102138	-2.60593	0.0098738	236	0.20019	-0.466353	-0.0659737	0
oid21201	Q9UKR0	KLK12	0.131051	0.0504433	2.59799	0.0100946	236	0.0988689	0.0321824	0.22992	0.38
oid20931	Q02083	NAAA	0.223866	0.086576	2.58577	0.0104429	236	0.169689	0.054177	0.393555	0
oid20768	P36941	LTBR	0.226148	0.0877852	2.57615	0.010725	236	0.172059	0.0540889	0.398207	0
oid21482	Q9NP84	TNFRSF12A	0.241092	0.0937457	2.57176	0.0108558	236	0.183742	0.0573502	0.424833	0
oid21143	P07108	DBI	-0.245233	0.09542	-2.57003	0.0109077	236	0.187023	-0.432256	-0.0582095	0
oid20761	O75563	SKAP2	0.285042	0.111057	2.56662	0.0110109	236	0.217672	0.06737	0.502714	0
oid20317	O15031	PLXNB2	-0.221668	0.0864462	-2.56423	0.0110838	236	0.169435	-0.391103	-0.0522333	0
oid21151	Q9Y624	F11R	0.2739	0.107116	2.55705	0.011305	236	0.209947	0.0639536	0.483847	0
oid21294	Q9Y653	ADGRG1	-0.122032	0.0479224	-2.54646	0.0116388	236	0.0939279	-0.21596	-0.0281045	0
oid21086	P12081	HARS1	-0.320262	0.125848	-2.54483	0.0116909	236	0.246663	-0.566925	-0.0735999	0.004
oid20787	Q03403	TFF2	-0.220133	0.0868328	-2.53514	0.0120052	236	0.170192	-0.390326	-0.049941	0
oid20506	Q8IU57	IFNLR1	-0.246127	0.0971159	-2.53436	0.0120307	236	0.190347	-0.436474	-0.0557799	0
oid20986	Q9H477	RBKS	-0.238574	0.0941477	-2.53404	0.0120414	236	0.184529	-0.423103	-0.0540444	0
oid20959	Q8WV92	MITD1	-0.262799	0.103717	-2.53382	0.0120486	236	0.203285	-0.466084	-0.0595147	0
oid20666	P29460	IL12B	-0.199153	0.0786891	-2.53089	0.0121456	236	0.154231	-0.353384	-0.0449225	0
oid20672	P03956	MMP1	0.172339	0.0683438	2.52165	0.0124555	236	0.133954	0.0383851	0.306293	0
oid21410	Q9C005	DPY30	-0.232136	0.0922149	-2.51734	0.0126025	236	0.180741	-0.412877	-0.0513946	0
oid21110	P14209	CD99	0.22641	0.0901761	2.51075	0.0128302	236	0.176745	0.0496643	0.403155	0
oid20703	Q9BY76	ANGPTL4	-0.269364	0.1074	-2.50804	0.0129248	236	0.210504	-0.479868	-0.0588597	0
oid20103	P25815	S100P	0.280609	0.111995	2.50555	0.0130123	236	0.21951	0.0610993	0.500119	0
oid20934	Q9UBT3	DKK4	0.21313	0.0852555	2.49989	0.0132135	236	0.167101	0.0460287	0.38023	0
oid20590	Q6UXB4	CLEC4G	-0.223704	0.0897748	-2.49183	0.0135047	236	0.175959	-0.399662	-0.0477449	0
oid20657	Q12866	MERTK	0.245443	0.0985984	2.48932	0.0135964	236	0.193253	0.0521903	0.438696	0
oid21379	Q02742	GCNT1	-0.252215	0.101504	-2.48478	0.0137638	236	0.198948	-0.451163	-0.0532676	0
oid20302	P15907	ST6GAL1	-0.258682	0.104765	-2.46917	0.0143541	236	0.205338	-0.46402	-0.0533431	0
oid20926	O00308	WWP2	-0.238008	0.0965183	-2.46593	0.0144793	236	0.189176	-0.427184	-0.0488318	0
oid20126	Q05315	CLC	0.215558	0.0881903	2.44424	0.0153435	236	0.172853	0.0427054	0.388412	0.004
oid21417	Q16790	CA9	0.231184	0.0945985	2.44384	0.0153599	236	0.185413	0.0457708	0.416597	0
oid21492	Q9H8J5	MANSC1	0.214956	0.08822	2.43659	0.0156593	236	0.172911	0.0420446	0.387867	0
oid21360	Q9NZT2	OGFR	-0.25862	0.106618	-2.42567	0.0161199	236	0.208972	-0.467592	-0.0496484	0
oid21199	P35070	BTC	0.27449	0.113294	2.42281	0.0162422	236	0.222056	0.0524336	0.496546	0.124
oid20651	O75077	ADAM23	0.234781	0.0970107	2.42015	0.0163569	236	0.190141	0.0446398	0.424922	0
oid20722	Q9Y3D6	FIS1	0.249923	0.103373	2.41767	0.0164645	236	0.202611	0.0473112	0.452534	0
oid20588	P16455	MGMT	-0.211827	0.0877749	-2.4133	0.0166559	236	0.172039	-0.383866	-0.0397883	0.02
oid20221	Q9BUD6	SPON2	0.254098	0.105574	2.40683	0.0169426	236	0.206924	0.0471733	0.461022	0
oid20915	P15509	CSF2RA	-0.133651	0.0556916	-2.39983	0.0172575	236	0.109156	-0.242806	-0.0244951	0
oid20724	P25942	CD40	0.238233	0.0994078	2.39652	0.0174083	236	0.194839	0.0433939	0.433073	0
oid20849	P58417	NXPH1	0.250922	0.104753	2.39536	0.0174618	236	0.205317	0.0456051	0.456238	0.124
oid20883	Q8WUW1	BRK1	0.233964	0.0977688	2.39303	0.0175687	236	0.191627	0.0423369	0.425591	0.008
oid20115	O14793	MSTN	-0.210781	0.0881055	-2.39237	0.0175993	236	0.172687	-0.383468	-0.0380942	0
oid20800	P02533	KRT14	0.305999	0.1287	2.37762	0.0176193	236	0.252251	0.0537475	0.55825	0.916
oid20550	P20849	COL9A1	0.181188	0.0757872	2.39074	0.0176745	236	0.148543	0.0326448	0.329731	0.012
oid21499	P06870	KLK1	0.111705	0.0467631	2.38875	0.0177672	236	0.0916557	0.0200497	0.203361	0
oid20566	O76036	NCR1	0.208108	0.087161	2.38763	0.0178193	236	0.170836	0.0372728	0.378944	0
oid21355	Q8NEZ2	VPS37A	-0.279499	0.117292	-2.38293	0.0180402	236	0.229893	-0.509393	-0.049606	0.072
oid21133	P06734	FCER2	-0.181367	0.0761137	-2.38284	0.0180442	236	0.149183	-0.33055	-0.032184	0
oid20127	Q6PJW8	CNST	-0.294783	0.12378	-2.38151	0.0181073	236	0.242609	-0.537391	-0.0521741	0.216
oid21039	P78325	ADAM8	-0.224863	0.0947943	-2.37211	0.0185571	236	0.185797	-0.41066	-0.0390661	0
oid20167	Q969P0	IGSF8	0.233815	0.0988926	2.36433	0.0189373	236	0.193829	0.0399854	0.427644	0
oid21291	Q9UKR3	KLK13	0.175154	0.0743369	2.35622	0.0193407	236	0.1457	0.0294538	0.320854	0
oid21310	O95498	VNN2	-0.181322	0.0775008	-2.33961	0.0201908	236	0.151902	-0.333223	-0.0294202	0
oid21056	P25774	CTSS	-0.224391	0.0961295	-2.33426	0.0204716	236	0.188414	-0.412805	-0.0359776	0
oid20165	Q9NY25	CLEC5A	0.230537	0.0991064	2.32616	0.0209034	236	0.194249	0.0362887	0.424786	0
oid20581	Q9UKX5	ITGA11	0.206629	0.0888591	2.32535	0.0209469	236	0.174164	0.0324647	0.380793	0
oid20449	Q8N6P7	IL22RA1	0.253632	0.109082	2.32515	0.0209578	236	0.213801	0.0398311	0.467433	0.288
oid21127	O43505	B4GAT1	0.228102	0.0981516	2.32397	0.0210212	236	0.192377	0.0357246	0.420479	0
oid20678	P15260	IFNGR1	0.225689	0.097138	2.32338	0.0210532	236	0.190391	0.0352981	0.416079	0
oid20121	Q9Y4X3	CCL27	0.235306	0.101321	2.32239	0.0211068	236	0.198588	0.0367178	0.433894	0
oid21215	P31994	FCGR2B	-0.276734	0.119196	-2.32167	0.0211463	236	0.233625	-0.510359	-0.0431092	0.032
oid20907	P29218	IMPA1	-0.264042	0.113771	-2.32081	0.0211927	236	0.222992	-0.487034	-0.0410502	0.16
oid21358	O00592	PODXL	-0.25968	0.111936	-2.31989	0.0212428	236	0.219395	-0.479075	-0.040285	0
oid21084	P23381	WARS	-0.232475	0.100238	-2.31923	0.0212787	236	0.196466	-0.428941	-0.0360089	0
oid20597	Q9HCM2	PLXNA4	0.258146	0.111384	2.31763	0.0213667	236	0.218312	0.0398338	0.476457	0
oid21118	P63313	TMSB10	-0.227843	0.0984108	-2.31523	0.0214987	236	0.192885	-0.420728	-0.0349581	0
oid20589	O94992	HEXIM1	-0.243998	0.105525	-2.31223	0.0216642	236	0.206829	-0.450827	-0.0371696	0
oid21265	P10747	CD28	-0.244881	0.106109	-2.30783	0.0219099	236	0.207973	-0.452854	-0.0369078	0
oid20646	Q9Y6Q6	TNFRSF11A	-0.192698	0.0835212	-2.30717	0.0219467	236	0.163702	-0.3564	-0.0289963	0
oid20747	P24387	CRHBP	-0.224604	0.0976829	-2.29932	0.0223918	236	0.191459	-0.416062	-0.0331454	0
oid21451	Q9HAV5	EDA2R	0.15187	0.0661061	2.29737	0.0225032	236	0.129568	0.0223022	0.281438	0
oid20675	Q07325	CXCL9	0.222428	0.0969844	2.29344	0.0227297	236	0.190089	0.0323386	0.412517	0
oid20160	Q9ULL4	PLXNB3	0.245177	0.107036	2.29061	0.0228944	236	0.20979	0.0353868	0.454967	0
oid20922	Q8TCT1	PHOSPHO1	-0.181314	0.0792987	-2.28647	0.0231363	236	0.155425	-0.33674	-0.0258889	0
oid21135	Q16881	TXNRD1	-0.252607	0.110509	-2.28585	0.0231732	236	0.216598	-0.469205	-0.0360091	0
oid21277	P51692	STAT5B	-0.263673	0.115921	-2.2746	0.023844	236	0.227204	-0.490877	-0.0364686	0
oid21412	O43827	ANGPTL7	0.200498	0.0881655	2.27411	0.0238737	236	0.172804	0.0276934	0.373302	0
oid20110	P40818	USP8	-0.210101	0.092578	-2.26945	0.0241566	236	0.181453	-0.391554	-0.0286485	0.044
oid20139	P21549	AGXT	-0.19801	0.0880474	-2.24891	0.0254405	236	0.172573	-0.370583	-0.0254377	0
oid21288	P34949	MPI	-0.264533	0.117741	-2.24673	0.0255802	236	0.230773	-0.495306	-0.0337599	0.564
oid21062	P14207	FOLR2	-0.208975	0.0930312	-2.24629	0.0256083	236	0.182341	-0.391316	-0.0266341	0
oid20487	Q9HB29	IL1RL2	0.192383	0.0857578	2.24333	0.025799	236	0.168085	0.0242982	0.360469	0
oid20252	P04054	PLA2G1B	0.216847	0.0968619	2.23873	0.0260987	236	0.189849	0.0269981	0.406697	0
oid21011	P15151	PVR	0.223886	0.100083	2.23701	0.0262109	236	0.196162	0.0277243	0.420048	0
oid21321	Q7Z5A7	TAFA5	0.193706	0.0866328	2.23594	0.0262813	236	0.1698	0.0239056	0.363506	0
oid20161	Q06418	TYRO3	-0.252071	0.113223	-2.22632	0.0269206	236	0.221917	-0.473989	-0.0301541	0
oid21124	P00749	PLAU	-0.212229	0.0954926	-2.22246	0.0271813	236	0.187166	-0.399394	-0.025063	0
oid21023	P35237	SERPINB6	0.224142	0.100973	2.21983	0.02736	236	0.197907	0.0262356	0.422049	0
oid20779	O95866	MPIG6B	0.249746	0.11252	2.21958	0.027377	236	0.220538	0.0292077	0.470285	0
oid20435	O43707	ACTN4	0.27323	0.123172	2.21828	0.027466	236	0.241417	0.0318123	0.514647	0.876
oid20318	Q14393	GAS6	-0.218021	0.0983126	-2.21763	0.02751	236	0.192693	-0.410714	-0.0253285	0
oid20628	Q9BZW8	CD244	-0.195444	0.0881866	-2.21625	0.0276046	236	0.172846	-0.368289	-0.022598	0
oid20633	Q14005	IL16	-0.212274	0.0958454	-2.21475	0.0277079	236	0.187857	-0.40013	-0.0244166	0
oid20234	P19971	TYMP	-0.205056	0.0927327	-2.21126	0.0279491	236	0.181756	-0.386812	-0.0233001	0
oid21137	Q8TDQ0	HAVCR2	-0.183111	0.0831124	-2.20317	0.0285153	236	0.1629	-0.346011	-0.0202108	0
oid21297	P10606	COX5B	-0.252883	0.114875	-2.20138	0.0286424	236	0.225155	-0.478037	-0.0277282	0.24
oid20049	P16860	NPPB	0.248877	0.113227	2.19804	0.0288803	236	0.221925	0.0269521	0.470803	0.872
oid21470	Q16543	CDC37	-0.260909	0.118971	-2.19304	0.0292388	236	0.233184	-0.494092	-0.0277254	0.504
oid20429	Q8NHJ6	LILRB4	-0.176415	0.0804848	-2.19191	0.0293207	236	0.15775	-0.334166	-0.0186651	0
oid20475	O43597	SPRY2	0.250877	0.114656	2.18809	0.0295982	236	0.224725	0.0261518	0.475602	0.076
oid20645	P00813	ADA	-0.159654	0.0729824	-2.18756	0.0296367	236	0.143046	-0.302699	-0.0166081	0
oid20900	O95256	IL18RAP	-0.0990014	0.0454352	-2.17896	0.030271	236	0.089053	-0.188054	-0.00994842	0
oid20363	P30530	AXL	-0.201379	0.0925542	-2.1758	0.0305072	236	0.181406	-0.382785	-0.0199728	0
oid21021	O14737	PDCD5	-0.246701	0.113503	-2.17352	0.0306782	236	0.222466	-0.469168	-0.024235	0
oid20982	O15197	EPHB6	0.207686	0.0955729	2.17307	0.0307121	236	0.187323	0.0203635	0.395009	0
oid21485	P41439	FOLR3	-0.168424	0.0776989	-2.16765	0.0311226	236	0.15229	-0.320714	-0.0161343	0
oid21233	Q06787	FMR1	0.276698	0.127782	2.16539	0.0311872	236	0.250453	0.0262449	0.527151	0.98
oid21104	P35442	THBS2	-0.201811	0.0937609	-2.1524	0.0323041	236	0.183771	-0.385582	-0.0180396	0
oid20426	P05112	IL4	0.236526	0.110411	2.14224	0.0331127	236	0.216405	0.0201211	0.452931	0.644
oid20638	Q9UQV4	LAMP3	0.168292	0.0786767	2.13904	0.0333712	236	0.154206	0.0140859	0.322499	0
oid20485	P51617	IRAK1	0.238644	0.111804	2.13449	0.0337413	236	0.219135	0.0195082	0.457779	0.008
oid20598	P28827	PTPRM	-0.223964	0.104948	-2.13405	0.0337774	236	0.205699	-0.429663	-0.0182658	0
oid20439	Q9HCU5	PREB	0.26727	0.125278	2.1334	0.0338298	236	0.245546	0.0217239	0.512815	0.876
oid20606	P42702	LIFR	0.221075	0.10415	2.12266	0.0347201	236	0.204134	0.0169411	0.425209	0
oid21313	Q9UK85	DKKL1	0.0990567	0.0467609	2.11837	0.0350818	236	0.0916514	0.00740532	0.190708	0
oid21218	Q8IWL1	SFTPA2	0.164149	0.0775938	2.11549	0.0353255	236	0.152084	0.0120651	0.316233	0.068
oid20422	Q9UHF4	IL20RA	0.215471	0.102169	2.10896	0.0358849	236	0.200252	0.0152191	0.415723	0.652
oid20870	Q15633	TARBP2	-0.255462	0.121267	-2.10661	0.0360877	236	0.237683	-0.493144	-0.0177794	0.012
oid21408	O14558	HSPB6	-0.182846	0.087117	-2.09885	0.0367655	236	0.170749	-0.353595	-0.0120965	0
oid21472	P20138	CD33	-0.0982132	0.0468896	-2.09456	0.0371448	236	0.0919035	-0.190117	-0.00630969	0
oid21521	P12931	SRC	0.245361	0.117163	2.09419	0.0371784	236	0.229639	0.0157217	0.475	0
oid20099	Q8NC01	CLEC1A	0.196834	0.0943337	2.08657	0.037861	236	0.184894	0.0119397	0.381728	0
oid20882	Q9UPY6	WASF3	0.268498	0.1294	2.07494	0.0380517	236	0.253625	0.0148732	0.522123	0.964
oid21178	O75787	ATP6AP2	0.217662	0.104529	2.08231	0.0382474	236	0.204877	0.0127849	0.422539	0.68
oid21252	Q9UHF1	EGFL7	0.192005	0.0922301	2.08181	0.038293	236	0.180771	0.0112345	0.372777	0
oid21305	Q9H4A9	DPEP2	-0.225214	0.108421	-2.07722	0.0387137	236	0.212505	-0.437719	-0.0127088	0
oid21339	Q96I82	KAZALD1	0.181331	0.0874889	2.07262	0.0391388	236	0.171478	0.00985308	0.352809	0
oid20783	Q92956	TNFRSF14	0.221334	0.106871	2.07103	0.0392866	236	0.209468	0.0118662	0.430801	0
oid20980	Q9NPH6	OBP2B	0.130916	0.0633206	2.06752	0.0396157	236	0.124108	0.00680794	0.255025	0
oid21077	P31948	STIP1	-0.253086	0.123349	-2.05179	0.0411165	236	0.241765	-0.494851	-0.0113218	0.012
oid20564	P24071	FCAR	-0.151657	0.074095	-2.04679	0.0416036	236	0.145226	-0.296883	-0.00643048	0
oid20398	P17936	IGFBP3	-0.155393	0.0762276	-2.03854	0.0424177	236	0.149406	-0.304799	-0.00598712	0
oid21213	Q9UKS7	IKZF2	0.189474	0.0930469	2.03632	0.0426391	236	0.182372	0.00710169	0.371846	0.808
oid20686	O00585	CCL21	-0.195329	0.0961481	-2.03154	0.0431198	236	0.18845	-0.383779	-0.00687851	0
oid20821	Q8N2G4	LYPD1	0.207527	0.102361	2.02741	0.0435391	236	0.200627	0.00689966	0.408155	0.664
oid20705	P21860	ERBB3	-0.203621	0.100523	-2.02561	0.043722	236	0.197025	-0.400646	-0.00659555	0
oid20632	Q13241	KLRD1	-0.129816	0.0642099	-2.02175	0.044118	236	0.125851	-0.255668	-0.00396506	0
oid20062	P17516	AKR1C4	-0.225779	0.111726	-2.02082	0.0442138	236	0.218984	-0.444763	-0.00679545	0.6
oid20540	P78410	BTN3A2	0.180915	0.0895745	2.01972	0.0443277	236	0.175566	0.00534935	0.356481	0
oid21432	Q9NPH0	ACP6	0.109071	0.0542159	2.01179	0.0451536	236	0.106263	0.00280806	0.215334	0.012
oid20190	Q9Y286	SIGLEC7	-0.193101	0.0960287	-2.01086	0.0452515	236	0.188216	-0.381317	-0.0048843	0
oid21150	P17538	CTRB1	0.181835	0.0905693	2.00769	0.0455866	236	0.177516	0.00431909	0.359351	0
oid20746	Q96KG7	MEGF10	0.154635	0.0770446	2.00709	0.04565	236	0.151007	0.00362807	0.305643	0
oid20663	P12544	GZMA	-0.14829	0.0739458	-2.00538	0.0458311	236	0.144934	-0.293224	-0.00335599	0
oid21003	Q9BS40	LXN	-0.228951	0.114237	-2.00417	0.0459604	236	0.223905	-0.452856	-0.00504592	0
oid21496	Q02763	TEK	-0.201948	0.101039	-1.99873	0.0465442	236	0.198036	-0.399984	-0.00391277	0
oid20861	P39905	GDNF	0.196893	0.0986538	1.9958	0.0468603	236	0.193361	0.00353196	0.390255	0.232
oid21243	Q8TD06	AGR3	0.202281	0.101486	1.9932	0.0471436	236	0.198912	0.00336882	0.401193	0.516
oid20498	Q13261	IL15RA	0.18832	0.0945697	1.99133	0.0473467	236	0.185357	0.00296325	0.373676	0.188
oid20370	P10721	KIT	0.181538	0.0912069	1.9904	0.0474488	236	0.178766	0.00277282	0.360304	0
oid21008	P22223	CDH3	0.162801	0.081821	1.98973	0.0475229	236	0.160369	0.00243219	0.32317	0
oid21349	Q8N9I9	DTX3	0.199483	0.100312	1.98862	0.0476443	236	0.196612	0.00287095	0.396094	0
oid20792	Q92597	NDRG1	0.195306	0.0983891	1.98504	0.0480393	236	0.192843	0.00246373	0.388149	0.016
oid20377	P08174	CD55	0.184973	0.0932226	1.9842	0.048132	236	0.182716	0.00225637	0.367689	0
oid20995	P28325	CST5	0.151556	0.0764423	1.98263	0.0483074	236	0.149827	0.00172952	0.301383	0
oid20975	P50135	HNMT	-0.187394	0.0945397	-1.98217	0.0483582	236	0.185298	-0.372691	-0.00209584	0
oid20307	Q12860	CNTN1	0.166686	0.0841115	1.98173	0.0484074	236	0.164858	0.00182749	0.331544	0
oid20386	P00441	SOD1	-0.231037	0.11722	-1.97098	0.0496179	236	0.22975	-0.460788	-0.00128701	0.004
oid20993	Q99426	TBCB	-0.210809	0.107128	-1.96782	0.0499788	236	0.209972	-0.420781	-0.000837543	0
oid20142	Q9UHL4	DPP7	0.176933	0.0899753	1.96646	0.0501341	236	0.176352	0.000581608	0.353285	0
oid20372	P08709	F7	-0.169945	0.0869094	-1.95543	0.0514147	236	0.170342	-0.340288	0.000397192	0
oid20539	Q6ZMH5	SLC39A5	0.181522	0.0930512	1.95078	0.0519631	236	0.18238	-0.000858336	0.363903	0
oid20163	O75340	PDCD6	0.143032	0.0736869	1.94108	0.0531218	236	0.144426	-0.00139432	0.287458	0.024
oid20525	Q9UNE0	EDAR	0.171638	0.0886396	1.93635	0.053694	236	0.173734	-0.00209592	0.345371	0
oid20522	P01588	EPO	-0.17486	0.0905321	-1.93147	0.0542913	236	0.177443	-0.352303	0.00258294	0.012
oid20406	P27487	DPP4	-0.166823	0.0864486	-1.92974	0.0545039	236	0.169439	-0.336263	0.00261586	0
oid21090	Q86T13	CLEC14A	0.173169	0.089749	1.92948	0.0545361	236	0.175908	-0.00273911	0.349077	0
oid21173	A4D1B5	GSAP	0.171763	0.0891203	1.92732	0.054803	236	0.174676	-0.00291248	0.346439	0.424
oid21471	O43464	HTRA2	0.179276	0.0930282	1.92711	0.0548288	236	0.182335	-0.00305956	0.361611	0
oid20331	P23284	PPIB	0.163785	0.0850492	1.92576	0.0549959	236	0.166697	-0.00291171	0.330481	0
oid20385	P08887	IL6R	-0.135662	0.0707103	-1.91856	0.0558973	236	0.138592	-0.274254	0.00293057	0
oid20243	P33151	CDH5	-0.196159	0.102254	-1.91836	0.0559224	236	0.200417	-0.396577	0.00425826	0
oid20903	P14868	DARS1	-0.221334	0.115585	-1.91491	0.0563578	236	0.226546	-0.447881	0.00521174	0.12
oid20673	P49763	PGF	0.187473	0.0984105	1.90501	0.0576252	236	0.192885	-0.00541203	0.380357	0
oid21513	Q9UJ68	MSRA	-0.210135	0.11088	-1.89516	0.0589092	236	0.217324	-0.427459	0.00718979	0
oid20444	Q9Y478	PRKAB1	0.1884	0.0998466	1.88689	0.060005	236	0.195699	-0.00729944	0.384099	0.368
oid21517	O60259	KLK8	0.156773	0.0831104	1.88632	0.0600814	236	0.162896	-0.00612339	0.319669	0
oid20202	Q9UK05	GDF2	0.191106	0.101331	1.88594	0.0601319	236	0.19861	-0.00750411	0.389715	0
oid21398	P47992	XCL1	0.122185	0.0648771	1.88332	0.0604836	236	0.127159	-0.00497452	0.249344	0
oid20437	Q9NP70	AMBN	0.209224	0.11128	1.88015	0.0609115	236	0.21811	-0.00888542	0.427334	0.02
oid21467	P35318	ADM	-0.133637	0.0712517	-1.87557	0.0615349	236	0.139653	-0.273291	0.00601605	0
oid20186	Q13275	SEMA3F	-0.178713	0.0957462	-1.86653	0.0627793	236	0.187662	-0.366375	0.00894984	0
oid20149	Q6GTS8	PM20D1	-0.0939584	0.0503478	-1.86619	0.0628262	236	0.0986817	-0.19264	0.00472327	0.1
oid20206	Q07108	CD69	0.206774	0.111177	1.85986	0.0637103	236	0.217907	-0.0111334	0.424681	0
oid21304	O00233	PSMD9	-0.23462	0.127331	-1.84259	0.0661758	236	0.249569	-0.484189	0.0149499	0
oid21489	P21741	MDK	0.184472	0.100517	1.83523	0.0672513	236	0.197014	-0.012542	0.381486	0
oid21214	Q9P0V8	SLAMF8	-0.140196	0.0764993	-1.83265	0.067631	236	0.149939	-0.290135	0.00974228	0.016
oid20450	P14784	IL2RB	0.205703	0.112438	1.82948	0.0681004	236	0.220378	-0.0146754	0.426081	0.776
oid21382	Q99536	VAT1	-0.197091	0.107941	-1.82592	0.0686315	236	0.211564	-0.408655	0.0144731	0
oid20695	P13236	CCL4	-0.15138	0.0829236	-1.82554	0.0686886	236	0.16253	-0.31391	0.0111503	0
oid20616	P29965	CD40LG	0.199138	0.1091	1.82529	0.0687252	236	0.213835	-0.0146968	0.412973	0
oid21420	P20472	PVALB	0.155429	0.0851718	1.82489	0.0687858	236	0.166937	-0.0115079	0.322366	0
oid21114	P04179	SOD2	-0.173727	0.0952039	-1.82479	0.0688006	236	0.1866	-0.360326	0.0128728	0
oid20469	Q16552	IL17A	0.176463	0.0967744	1.82345	0.0690013	236	0.189678	-0.0132146	0.366141	0.564
oid21279	Q9UHD8	SEPTIN9	-0.233497	0.128737	-1.81375	0.0695035	236	0.252324	-0.485821	0.0188275	0.48
oid21322	Q11201	ST3GAL1	0.158062	0.0869939	1.81693	0.0699857	236	0.170508	-0.0124459	0.32857	0
oid20394	Q9NZK5	ADA2	-0.124688	0.0688028	-1.81225	0.0707008	236	0.134854	-0.259541	0.0101658	0
oid20081	O43854	EDIL3	0.182496	0.101376	1.8002	0.072568	236	0.198696	-0.0162003	0.381192	0
oid20396	P19320	VCAM1	0.167906	0.0933387	1.79889	0.0727733	236	0.182944	-0.0150381	0.35085	0
oid20607	Q9UIB8	CD84	0.193805	0.107836	1.79722	0.0730358	236	0.211359	-0.0175539	0.405163	0
oid20967	O00220	TNFRSF10A	0.151967	0.0847162	1.79383	0.0735703	236	0.166044	-0.0140771	0.31801	0
oid20180	Q9GZM7	TINAGL1	0.191664	0.106963	1.79187	0.0738809	236	0.209648	-0.0179832	0.401312	0
oid21370	Q86SJ2	AMIGO2	-0.192819	0.108174	-1.78249	0.0753855	236	0.212021	-0.40484	0.0192022	0
oid20670	Q9HBG7	LY9	-0.136896	0.0768273	-1.78187	0.0754861	236	0.150581	-0.287477	0.0136856	0
oid20087	P09237	MMP7	0.163952	0.0921993	1.77824	0.076075	236	0.180711	-0.0167583	0.344663	0
oid20480	Q96RJ3	TNFRSF13C	0.173154	0.0974669	1.77654	0.0763522	236	0.191035	-0.0178814	0.364189	0.036
oid20341	P20062	TCN2	-0.157567	0.0888007	-1.77439	0.0767041	236	0.174049	-0.331616	0.0164825	0
oid20171	Q8NI22	MCFD2	0.190712	0.107653	1.77155	0.0771709	236	0.211	-0.0202874	0.401712	0
oid20866	Q9H3R2	MUC13	0.154309	0.0872305	1.76898	0.0775946	236	0.170972	-0.0166625	0.325281	0
oid20100	O75354	ENTPD6	0.171886	0.0975391	1.76222	0.0787204	236	0.191177	-0.0192911	0.363062	0
oid20762	P09341	CXCL1	0.158934	0.0902961	1.76015	0.0790688	236	0.17698	-0.0180461	0.335915	0
oid21157	O76061	STC2	-0.174623	0.0992725	-1.75902	0.0792577	236	0.194574	-0.369197	0.0199515	0
oid20949	P16278	GLB1	0.172095	0.0981954	1.75258	0.0803498	236	0.192463	-0.0203681	0.364558	0
oid20497	Q8N8S7	ENAH	-0.177354	0.101232	-1.75196	0.0804552	236	0.198414	-0.375768	0.0210604	0
oid21337	Q14241	ELOA	-0.196207	0.112646	-1.7418	0.0822031	236	0.220787	-0.416994	0.0245795	0
oid20131	Q9H7M9	VSIR	0.184892	0.106399	1.73772	0.0829134	236	0.208543	-0.0236503	0.393435	0
oid20295	P80370	DLK1	-0.121347	0.069897	-1.73608	0.0832012	236	0.136998	-0.258345	0.0156515	0
oid21359	Q7Z5R6	APBB1IP	-0.170997	0.0985118	-1.7358	0.0832496	236	0.193083	-0.36408	0.0220862	0
oid20753	Q9NQ76	MEPE	0.172296	0.0994546	1.73241	0.083846	236	0.194931	-0.0226348	0.367227	0
oid20402	P04070	PROC	-0.18388	0.107008	-1.71839	0.0863502	236	0.209735	-0.393615	0.0258544	0
oid20708	Q14210	LY6D	0.140484	0.0819195	1.7149	0.086982	236	0.160562	-0.0200784	0.301046	0
oid21061	Q9P126	CLEC1B	0.166505	0.097221	1.71264	0.0873936	236	0.190553	-0.0240484	0.357058	0
oid20345	Q6EMK4	VASN	-0.176791	0.103269	-1.71195	0.0875207	236	0.202407	-0.379198	0.0256163	0
oid21195	O75493	CA11	0.168208	0.0984009	1.70942	0.0879837	236	0.192866	-0.0246575	0.361074	0
oid20118	P09496	CLTA	-0.16985	0.0998012	-1.70188	0.0893754	236	0.19561	-0.36546	0.0257604	0.812
oid20265	O14798	TNFRSF10C	-0.10792	0.0635484	-1.69823	0.0900566	236	0.124555	-0.232475	0.0166351	0
oid20831	Q9HAW4	CLSPN	0.197008	0.116702	1.68813	0.0919616	236	0.228736	-0.0317277	0.425744	0.84
oid20999	P37023	ACVRL1	0.177489	0.105161	1.68777	0.0920298	236	0.206117	-0.0286279	0.383605	0
oid20819	O96013	PAK4	0.190682	0.113185	1.68469	0.0926177	236	0.221842	-0.0311607	0.412524	0.888
oid21371	Q86SR1	GALNT10	-0.172112	0.102472	-1.67961	0.0935945	236	0.200844	-0.372956	0.0287322	0
oid20405	P49747	COMP	-0.137966	0.0825718	-1.67086	0.095295	236	0.161841	-0.299807	0.0238746	0
oid20586	P01374	LTA	-0.157361	0.094578	-1.66382	0.0966813	236	0.185373	-0.342734	0.0280117	0
oid20547	Q8WTT0	CLEC4C	-0.0972483	0.0585439	-1.66112	0.0972188	236	0.114746	-0.211994	0.0174978	0
oid20231	P07204	THBD	0.166006	0.0999901	1.66023	0.0973962	236	0.195981	-0.0299744	0.361987	0
oid20924	Q08629	SPOCK1	0.171624	0.1035	1.65821	0.0977986	236	0.202859	-0.031235	0.374483	0
oid20431	P22301	IL10	0.18272	0.110493	1.65368	0.0987084	236	0.216566	-0.0338463	0.399286	0.104
oid20989	Q9UL46	PSME2	-0.180617	0.109735	-1.64594	0.100277	236	0.21508	-0.395697	0.0344632	0
oid21311	Q9BTE6	AARSD1	-0.179252	0.10905	-1.64376	0.100724	236	0.213738	-0.392991	0.0344864	0
oid20602	Q9NQ25	SLAMF7	0.116377	0.0708065	1.6436	0.100757	236	0.138781	-0.0224034	0.255158	0
oid20089	Q8TE57	ADAMTS16	0.140843	0.0857469	1.64255	0.100972	236	0.168064	-0.0272205	0.308907	0
oid21032	Q8NBJ7	SUMF2	0.142816	0.0869742	1.64205	0.101073	236	0.170469	-0.027653	0.313286	0
oid20604	P10144	GZMB	-0.145514	0.0886484	-1.64148	0.101192	236	0.173751	-0.319265	0.0282367	0
oid20644	P30044	PRDX5	-0.168283	0.10257	-1.64067	0.101358	236	0.201037	-0.36932	0.0327535	0
oid21522	P18084	ITGB5	0.155098	0.0946675	1.63835	0.101837	236	0.185548	-0.0304499	0.340647	0
oid20635	P40259	CD79B	-0.138658	0.0847756	-1.63559	0.102408	236	0.16616	-0.304818	0.0275019	0
oid20237	P07911	UMOD	0.101034	0.0619247	1.63156	0.103246	236	0.121372	-0.0203383	0.222407	0
oid21301	P17948	FLT1	-0.18888	0.116024	-1.62793	0.104007	236	0.227408	-0.416287	0.0385279	0
oid20492	Q9BXJ7	AMN	-0.137441	0.0845251	-1.62604	0.104406	236	0.165669	-0.30311	0.028228	0.096
oid20432	P27540	ARNT	0.150666	0.0926752	1.62575	0.104468	236	0.181643	-0.030977	0.33231	0.916
oid20795	Q8IU54	IFNL1	0.198186	0.121914	1.62562	0.104494	236	0.238951	-0.0407651	0.437137	0.736
oid21435	Q9H3G5	CPVL	-0.128522	0.0791991	-1.62277	0.105098	236	0.15523	-0.283752	0.0267087	0
oid21531	Q16674	MIA	0.135466	0.0834784	1.62276	0.105099	236	0.163618	-0.028152	0.299083	0
oid20098	P40225	THPO	0.179179	0.110616	1.61983	0.105721	236	0.216806	-0.0376279	0.395985	0
oid20859	Q9Y2V2	CARHSP1	0.183287	0.113483	1.6151	0.106733	236	0.222428	-0.0391407	0.405714	0.004
oid21146	P11717	IGF2R	-0.159108	0.0985922	-1.6138	0.107013	236	0.193241	-0.352348	0.034133	0
oid21361	Q13576	IQGAP2	-0.189818	0.117941	-1.60943	0.107955	236	0.231164	-0.420982	0.0413468	0.028
oid21107	P22105	TNXB	-0.152335	0.0946518	-1.60942	0.107957	236	0.185518	-0.337852	0.0331829	0
oid20828	P09769	FGR	-0.16397	0.102467	-1.60022	0.109965	236	0.200836	-0.364807	0.036866	0.076
oid21367	O60763	USO1	-0.185616	0.116076	-1.59909	0.110213	236	0.22751	-0.413126	0.0418934	0.436
oid20573	Q9UMR7	CLEC4A	0.146859	0.0920046	1.59621	0.110848	236	0.180329	-0.0334702	0.327188	0
oid21502	Q9UP79	ADAMTS8	0.138975	0.0870705	1.59612	0.110869	236	0.170658	-0.0316833	0.309633	0
oid20091	Q92558	WASF1	0.18989	0.119506	1.58896	0.112461	236	0.234232	-0.0443413	0.424122	0.752
oid20373	Q99969	RARRES2	-0.160734	0.101336	-1.58614	0.113093	236	0.198619	-0.359352	0.037885	0
oid20229	Q92823	NRCAM	-0.169809	0.107181	-1.58433	0.113502	236	0.210074	-0.379883	0.040265	0
oid21144	Q9Y279	VSIG4	-0.134113	0.0846914	-1.58355	0.113677	236	0.165995	-0.300108	0.031882	0
oid20185	Q86VZ4	LRP11	0.168054	0.106202	1.5824	0.113936	236	0.208156	-0.0401015	0.37621	0
oid21005	P55291	CDH15	0.0905264	0.057298	1.57992	0.114498	236	0.112304	-0.0217778	0.202831	0
oid20569	Q9NRJ3	CCL28	0.159696	0.10113	1.57912	0.11468	236	0.198215	-0.0385184	0.357911	0.004
oid20719	P09603	CSF1	-0.164114	0.103969	-1.57849	0.114824	236	0.20378	-0.367894	0.0396656	0
oid20537	Q96LC7	SIGLEC10	-0.138172	0.0875608	-1.57801	0.114933	236	0.171619	-0.309791	0.0334474	0
oid20697	P02778	CXCL10	-0.153651	0.0979407	-1.56882	0.11704	236	0.191964	-0.345615	0.0383122	0
oid20957	Q92752	TNR	0.125159	0.079927	1.56591	0.117713	236	0.156657	-0.0314981	0.281816	0
oid21049	P28908	TNFRSF8	0.150266	0.0967402	1.55329	0.120672	236	0.189611	-0.0393452	0.339876	0
oid20698	P01133	EGF	0.184211	0.118766	1.55104	0.121205	236	0.232781	-0.0485703	0.416992	0
oid20270	Q96AP7	ESAM	0.163964	0.105773	1.55014	0.121418	236	0.207316	-0.0433519	0.371279	0
oid21450	Q6UWN8	SPINK6	0.153638	0.0992231	1.54841	0.121831	236	0.194477	-0.0408392	0.348115	0
oid20424	P05412	JUN	0.158852	0.102651	1.54749	0.12205	236	0.201197	-0.0423444	0.360049	0.564
oid20884	O95466	FMNL1	-0.145978	0.0943936	-1.54648	0.122291	236	0.185011	-0.33099	0.0390332	0.064
oid20709	P29279	CCN2	0.152161	0.0989472	1.5378	0.124381	236	0.193937	-0.0417752	0.346098	0
oid20617	Q07065	CKAP4	0.139362	0.0906371	1.53758	0.124435	236	0.177649	-0.0382868	0.317011	0
oid21452	P09960	LTA4H	-0.139148	0.0906397	-1.53518	0.125018	236	0.177654	-0.316802	0.0385055	0.86
oid20470	Q12968	NFATC3	0.122213	0.0796714	1.53396	0.125315	236	0.156156	-0.0339432	0.278369	0.64
oid21270	P51580	TPMT	-0.157439	0.102718	-1.53272	0.125617	236	0.201328	-0.358767	0.0438891	0.136
oid20718	P0DMV8	HSPA1A	-0.15669	0.102236	-1.53263	0.125641	236	0.200383	-0.357073	0.0436931	0
oid20634	O94856	NFASC	-0.103775	0.0677898	-1.53083	0.12608	236	0.132868	-0.236643	0.0290931	0
oid20260	P48960	ADGRE5	-0.130599	0.0853124	-1.53083	0.12608	236	0.167212	-0.297811	0.0366134	0
oid21131	P16284	PECAM1	-0.137514	0.0901366	-1.52561	0.127364	236	0.176668	-0.314181	0.0391541	0
oid20189	Q8IZP9	ADGRG2	0.154851	0.101571	1.52456	0.127623	236	0.199079	-0.0442278	0.353931	0
oid20609	Q8WXI8	CLEC4D	-0.113173	0.0742955	-1.52328	0.127941	236	0.145619	-0.258792	0.0324462	0
oid20812	Q6ZMC9	SIGLEC15	-0.137835	0.0904987	-1.52306	0.127997	236	0.177377	-0.315212	0.0395428	0.536
oid21167	Q92982	NINJ1	0.144568	0.0949539	1.52251	0.128132	236	0.18611	-0.0415414	0.330678	0.264
oid21402	Q9NSA1	FGF21	0.137089	0.0904105	1.5163	0.12968	236	0.177205	-0.0401152	0.314294	0
oid21509	P07237	P4HB	-0.152233	0.100699	-1.51176	0.130823	236	0.197371	-0.349603	0.0451379	0
oid21315	P18627	LAG3	-0.122363	0.0811019	-1.50875	0.131582	236	0.15896	-0.281322	0.0365972	0
oid20968	Q92765	FRZB	-0.154813	0.102854	-1.50517	0.132491	236	0.201594	-0.356406	0.0467808	0
oid21033	P01236	PRL	0.136476	0.0909481	1.50059	0.133662	236	0.178258	-0.0417822	0.314734	0
oid20790	Q86VW0	SESTD1	0.162349	0.108291	1.49919	0.134022	236	0.21225	-0.0499012	0.374599	0.856
oid20521	Q92609	TBC1D5	0.168673	0.112569	1.4984	0.134226	236	0.220634	-0.0519619	0.389307	0
oid20549	Q9BT73	PSMG3	-0.163388	0.109829	-1.48765	0.137014	236	0.215265	-0.378653	0.0518777	0
oid21354	P42658	DPP6	0.128742	0.0866551	1.48568	0.137529	236	0.169844	-0.0411018	0.298586	0
oid20071	O95183	VAMP5	0.167065	0.112695	1.48245	0.138379	236	0.220882	-0.0538172	0.387947	0.432
oid20298	P09093	CELA3A	0.131457	0.088714	1.48181	0.13855	236	0.173879	-0.0424225	0.305336	0
oid21014	P52823	STC1	-0.129428	0.087356	-1.48162	0.138599	236	0.171218	-0.300646	0.0417896	0
oid21284	Q86WD7	SERPINA9	0.133094	0.0898899	1.48063	0.13886	236	0.176184	-0.0430903	0.309278	0
oid21091	Q9HCN6	GP6	0.15663	0.105879	1.47933	0.139205	236	0.207524	-0.0508932	0.364154	0
oid21278	Q15427	SF3B4	-0.170784	0.115462	-1.47914	0.139256	236	0.226306	-0.39709	0.0555217	0.076
oid20092	Q99549	MPHOSPH8	-0.171278	0.116137	-1.47478	0.140412	236	0.227629	-0.398907	0.0563516	0.748
oid20527	Q8N608	DPP10	0.137271	0.0930863	1.47467	0.140443	236	0.182449	-0.0451779	0.319721	0
oid20239	Q13361	MFAP5	-0.140294	0.0951541	-1.47439	0.140518	236	0.186502	-0.326796	0.0462079	0
oid20419	P60568	IL2	0.171604	0.116643	1.47119	0.141372	236	0.22862	-0.0570161	0.400225	0.992
oid20077	Q15831	STK11	-0.183897	0.125099	-1.47001	0.141688	236	0.245193	-0.42909	0.0612968	0.148
oid21466	P80075	CCL8	0.115372	0.0786752	1.46643	0.142653	236	0.154203	-0.0388317	0.269575	0
oid21292	Q9GZY6	LAT2	-0.162536	0.110908	-1.4655	0.142905	236	0.21738	-0.379916	0.0548444	0.016
oid20591	P20783	NTF3	0.16861	0.11543	1.4607	0.144205	236	0.226244	-0.057634	0.394853	0
oid20763	Q16651	PRSS8	0.129617	0.0895181	1.44794	0.147712	236	0.175455	-0.0458389	0.305072	0
oid20267	P01589	IL2RA	-0.123375	0.0855106	-1.44281	0.14914	236	0.167601	-0.290976	0.0442254	0
oid20064	P36952	SERPINB5	0.186904	0.129758	1.44041	0.149794	236	0.254325	-0.0674211	0.44123	0.692
oid20086	P21964	COMT	-0.150263	0.104503	-1.43788	0.150522	236	0.204826	-0.355089	0.0545635	0
oid21419	Q9H6B4	CLMP	0.109256	0.0760837	1.43599	0.151053	236	0.149124	-0.0398685	0.25838	0
oid21272	P36888	FLT3	0.164879	0.114918	1.43476	0.151402	236	0.225238	-0.0603595	0.390117	0
oid21261	P0CG37	CFC1	-0.134333	0.09376	-1.43273	0.151976	236	0.18377	-0.318102	0.0494371	0
oid21281	Q5VIR6	VPS53	-0.168555	0.117987	-1.42859	0.153153	236	0.231255	-0.39981	0.0626996	0.58
oid20941	P38484	IFNGR2	-0.116672	0.0817697	-1.42684	0.153654	236	0.160269	-0.27694	0.0435967	0
oid21217	Q13490	BIRC2	0.161393	0.11344	1.42272	0.154834	236	0.222343	-0.0609497	0.383737	0.924
oid20413	P24592	IGFBP6	0.133555	0.0943182	1.416	0.156774	236	0.184864	-0.0513087	0.318419	0
oid21393	P26010	ITGB7	-0.111825	0.0791464	-1.41288	0.157682	236	0.155127	-0.266952	0.0433024	0
oid20559	Q9UDT6	CLIP2	-0.153883	0.108925	-1.41275	0.157722	236	0.213493	-0.367376	0.0596096	0.216
oid20942	Q15814	TBCC	-0.148704	0.105546	-1.4089	0.158847	236	0.206871	-0.355575	0.0581667	0
oid20985	Q07011	TNFRSF9	0.132636	0.09427	1.40698	0.15941	236	0.184769	-0.0521329	0.317405	0
oid20693	P55773	CCL23	0.122158	0.0869559	1.40482	0.160045	236	0.170434	-0.0482757	0.292591	0
oid20329	P24158	PRTN3	-0.129131	0.0921518	-1.40129	0.161091	236	0.180618	-0.309749	0.0514863	0
oid21469	Q8TDQ1	CD300LF	0.0889109	0.063647	1.39694	0.162384	236	0.124748	-0.0358372	0.213659	0
oid20740	Q15389	ANGPT1	0.135358	0.0970325	1.39497	0.162971	236	0.190184	-0.0548259	0.325541	0
oid20945	Q9Y6Y9	LY96	-0.120474	0.0863634	-1.39496	0.162975	236	0.169272	-0.289746	0.0487987	0
oid21224	O75380	NDUFS6	-0.144553	0.104001	-1.38992	0.164487	236	0.203842	-0.348395	0.0592886	0.32
oid20729	Q9NR12	PDLIM7	0.161623	0.116811	1.38362	0.166394	236	0.228951	-0.0673279	0.390573	0
oid21293	Q07954	LRP1	0.130823	0.0949035	1.37848	0.16796	236	0.186011	-0.0551882	0.316834	0
oid20749	Q9H008	LHPP	-0.152402	0.1108	-1.37547	0.168883	236	0.217168	-0.36957	0.0647659	0
oid20554	Q9NZN5	ARHGEF12	0.161373	0.117335	1.37532	0.16893	236	0.229976	-0.0686032	0.391348	0.172
oid20138	O60496	DOK2	0.167695	0.122036	1.37415	0.16929	236	0.23919	-0.0714951	0.406886	0.352
oid21176	Q9P0J1	PDP1	0.141274	0.103147	1.36964	0.170683	236	0.202168	-0.060894	0.343442	0.76
oid21528	P13688	CEACAM1	-0.156978	0.114788	-1.36754	0.171333	236	0.224985	-0.381963	0.0680072	0
oid21041	O00214	LGALS8	-0.118439	0.0870822	-1.36008	0.173664	236	0.170681	-0.28912	0.0522426	0
oid20630	P50452	SERPINB8	-0.119043	0.0875354	-1.35994	0.173707	236	0.171569	-0.290612	0.0525265	0
oid20874	O94985	CLSTN1	0.157591	0.115998	1.35857	0.174139	236	0.227356	-0.0697653	0.384947	0.084
oid20277	P32942	ICAM3	-0.120829	0.0891625	-1.35516	0.175214	236	0.174759	-0.295588	0.0539294	0
oid20425	Q96AX2	RAB37	0.118968	0.088075	1.35076	0.176609	236	0.172627	-0.0536592	0.291595	0.548
oid20716	P19256	CD58	0.129749	0.0961193	1.34987	0.17689	236	0.188394	-0.0586452	0.318143	0
oid21180	Q15797	SMAD1	0.150856	0.111858	1.34864	0.17728	236	0.219241	-0.0683847	0.370097	0.68
oid20286	P31146	CORO1A	0.162	0.120206	1.34768	0.177587	236	0.235604	-0.0736044	0.397604	0
oid20361	Q14515	SPARCL1	0.132678	0.0985538	1.34624	0.178047	236	0.193165	-0.0604879	0.325843	0
oid20557	P45984	MAPK9	0.141916	0.105587	1.34406	0.178746	236	0.206951	-0.0650354	0.348867	0
oid20223	Q6WN34	CHRDL2	0.133558	0.0998058	1.33818	0.180641	236	0.195619	-0.0620616	0.329177	0
oid21122	Q8TCZ2	CD99L2	-0.132679	0.099163	-1.33799	0.180703	236	0.19436	-0.327038	0.0616808	0
oid20969	Q06323	PSME1	-0.154629	0.115836	-1.3349	0.181704	236	0.227038	-0.381667	0.0724093	0
oid21356	O60825	PFKFB2	0.123831	0.0928532	1.33363	0.182117	236	0.181992	-0.0581609	0.305824	0
oid20427	P01584	IL1B	-0.171297	0.12909	-1.32695	0.184256	236	0.253017	-0.424314	0.0817202	0.292
oid21375	Q8IXJ6	SIRT2	-0.161868	0.121993	-1.32686	0.184327	236	0.239107	-0.400975	0.0772383	0
[truncated: 700 more rows]

## Sheet: ST4
Supplementary Table 4 - Merged linear mixed model results for the effect of timepoint on protein levels in the Diabetes Remission Clinical Trial (DiRECT) and the By-Band-Sleeve trial. Published correlation coefficients of proteins across Olink and SomaLogic shown in blue are merged from Haslam et al. (https://doi.org:10.1002/pmic.202100170)
[truncated: 990 more rows]

[truncated: 2 more sheets: ST5, ST6]
